# Supplementary material for: EMC-dependent membrane insertion of IER3IP1 sustains efficient ER-to-Golgi trafficking
Source: Research Square preprint supplement (doi:10.21203/rs.3.rs-8560191/v1), 2026-02-11
Supplement: Supplementary file 1 [file 04cf109402b866b2efd5bc0e.xlsx]

## Sheet: MP & SP (Coverage>5%)
Accession	Protein Description	q_value	Coverage (%)	Peptides	Unique Peptides	Amino Acids	Abundance Ratio (log2): DEMC/WT	Abundance Ratio Adj. P-Value (-log10): DEMC/WT	Abundance WT	Abundance DEMC
P37268	Squalene synthase OS=Homo sapiens OX=9606 GN=FDFT1 PE=1 SV=1	0	32	10	10	417	-0.680774	0.800025	120.1	79.9
P00167	Cytochrome b5 OS=Homo sapiens OX=9606 GN=CYB5A PE=1 SV=2	0	33	3	3	134	-0.688852	0.764569	123.2	76.8
P06276	Cholinesterase OS=Homo sapiens OX=9606 GN=BCHE PE=1 SV=1	0	10	4	4	602	-0.698663	0.818795	123.2	76.8
Q13740	CD166 antigen OS=Homo sapiens OX=9606 GN=ALCAM PE=1 SV=2	0	5	2	2	583	-0.70044	0.612985	125.4	74.6
E7EPA6	Laminin subunit beta-1 OS=Homo sapiens OX=9606 GN=LAMB1 PE=1 SV=1	0	36	16	1	850	-0.719841	0.505099	124.9	75.1
Q6NSJ5	Volume-regulated anion channel subunit LRRC8E OS=Homo sapiens OX=9606 GN=LRRC8E PE=1 SV=2	0	26	14	14	796	-0.738119	0.864979	115.8	84.2
Q9BWS9-3	Isoform 3 of Chitinase domain-containing protein 1 OS=Homo sapiens OX=9606 GN=CHID1	0	38	10	1	362	-0.761285	0.582178	125.8	74.2
Q8WUF8	Cotranscriptional regulator FAM172A OS=Homo sapiens OX=9606 GN=FAM172A PE=2 SV=1	0	6	2	2	416	-0.792439	0.693728	127.1	72.9
P01033	Metalloproteinase inhibitor 1 OS=Homo sapiens OX=9606 GN=TIMP1 PE=1 SV=1	0.006	6	1	1	207	-0.807355	1.18576	127.3	72.7
Q8N766	ER membrane protein complex subunit 1 OS=Homo sapiens OX=9606 GN=EMC1 PE=1 SV=1	0	38	26	26	993	-0.903038	1.8145	130.3	69.7
Q8NI22	Multiple coagulation factor deficiency protein 2 OS=Homo sapiens OX=9606 GN=MCFD2 PE=1 SV=1	0.001	12	1	1	146	-0.952334	1.09464	131.9	68.1
Q7Z3D4	LysM and putative peptidoglycan-binding domain-containing protein 3 OS=Homo sapiens OX=9606 GN=LYSMD3 PE=1 SV=2	0	20	3	3	306	-0.992043	1.87883	135.5	64.5
Q9NPA0	ER membrane protein complex subunit 7 OS=Homo sapiens OX=9606 GN=EMC7 PE=1 SV=1	0	40	6	6	242	-1.02006	2.09887	131	69
P12763	Alpha-2-HS-glycoprotein OS=Bos taurus GN=AHSG PE=1 SV=2	0	9	2	2	359	-1.12631	1.59595	73.7	126.3
M0R2A0	ER membrane protein complex subunit 10 OS=Homo sapiens OX=9606 GN=EMC10 PE=1 SV=1	0	8	3	3	371	-1.29572	4.2213	144.1	55.9
Q9BV81	ER membrane protein complex subunit 6 OS=Homo sapiens OX=9606 GN=EMC6 PE=1 SV=1	0	12	2	2	110	-1.50843	5.38558	147.6	52.4
Q9P0I2	ER membrane protein complex subunit 3 OS=Homo sapiens OX=9606 GN=EMC3 PE=1 SV=3	0	47	8	8	261	-1.83188	8.37521	159.1	40.9
Q5J8M3	ER membrane protein complex subunit 4 OS=Homo sapiens OX=9606 GN=EMC4 PE=1 SV=2	0	34	4	4	183	-1.89336	8.17904	159.4	40.6
Q8N4V1-2	Isoform 2 of Membrane magnesium transporter 1 OS=Homo sapiens OX=9606 GN=MMGT1	0	12	1	1	196	-2.2966	13.6682	166.2	33.8
Q9Y5U9	Immediate early response 3-interacting protein 1 OS=Homo sapiens OX=9606 GN=IER3IP1 PE=1 SV=1	0	24	1	1	82	-9.96578	15.3133	200
H0Y2P9	Phosphatidylinositol-glycan biosynthesis class X protein OS=Homo sapiens OX=9606 GN=PIGX PE=1 SV=1	0.002	7	1	1	276	-9.96578	15.3133	200
O60512	Beta-1,4-galactosyltransferase 3 OS=Homo sapiens OX=9606 GN=B4GALT3 PE=1 SV=2	0.001	6	1	1	393	-9.96578	15.3133	200
