# Supplementary material for: EMC-dependent membrane insertion of IER3IP1 sustains efficient ER-to-Golgi trafficking
Source: Research Square preprint supplement (doi:10.21203/rs.3.rs-8560191/v1), 2026-02-11
Supplement: Supplementary file 2 [file 0c290c56710a7b83560547eb.xlsx]

## Sheet: Raw (coverage>5%)
Accession	Protein Description	q_value	Coverage (%)	Peptides	Unique Peptides	Amino Acids	Abundance Ratio (log2): DEMC/WT	Abundance Ratio Adj. P-Value (-log10): DEMC/WT	Abundance WT	Abundance DEMC
Q9Y5U9	Immediate early response 3-interacting protein 1 OS=Homo sapiens OX=9606 GN=IER3IP1 PE=1 SV=1	0	24	1	1	82	-9.96578	15.3133	200
Q9Y3B6	ER membrane protein complex subunit 9 OS=Homo sapiens OX=9606 GN=EMC9 PE=1 SV=3	0	11	2	2	208	-9.96578	15.3133	200
Q96HH9-3	Isoform 3 of GRAM domain-containing protein 2B OS=Homo sapiens OX=9606 GN=GRAMD2B	0	6	1	1	447	-9.96578	15.3133	200
O60512	Beta-1,4-galactosyltransferase 3 OS=Homo sapiens OX=9606 GN=B4GALT3 PE=1 SV=2	0.001	6	1	1	393	-9.96578	15.3133	200
H0Y2P9	Phosphatidylinositol-glycan biosynthesis class X protein OS=Homo sapiens OX=9606 GN=PIGX PE=1 SV=1	0.002	7	1	1	276	-9.96578	15.3133	200
A0A2R8Y6G6	Alpha-enolase OS=Homo sapiens OX=9606 GN=ENO1 PE=1 SV=1	0	8	2	2	434	-9.96578	15.3133	200
O43402	ER membrane protein complex subunit 8 OS=Homo sapiens OX=9606 GN=EMC8 PE=1 SV=1	0	42	6	6	210	-2.30276	11.9604	168.8	31.2
Q8N4V1-2	Isoform 2 of Membrane magnesium transporter 1 OS=Homo sapiens OX=9606 GN=MMGT1	0	12	1	1	196	-2.2966	13.6682	166.2	33.8
Q15006	ER membrane protein complex subunit 2 OS=Homo sapiens OX=9606 GN=EMC2 PE=1 SV=1	0	33	8	8	297	-1.90997	9.03927	158.3	41.7
Q5J8M3	ER membrane protein complex subunit 4 OS=Homo sapiens OX=9606 GN=EMC4 PE=1 SV=2	0	34	4	4	183	-1.89336	8.17904	159.4	40.6
Q9P0I2	ER membrane protein complex subunit 3 OS=Homo sapiens OX=9606 GN=EMC3 PE=1 SV=3	0	47	8	8	261	-1.83188	8.37521	159.1	40.9
Q9BV81	ER membrane protein complex subunit 6 OS=Homo sapiens OX=9606 GN=EMC6 PE=1 SV=1	0	12	2	2	110	-1.50843	5.38558	147.6	52.4
M0R2A0	ER membrane protein complex subunit 10 OS=Homo sapiens OX=9606 GN=EMC10 PE=1 SV=1	0	8	3	3	371	-1.29572	4.2213	144.1	55.9
P12763	Alpha-2-HS-glycoprotein OS=Bos taurus GN=AHSG PE=1 SV=2	0	9	2	2	359	-1.12631	1.59595	73.7	126.3
Q9NPA0	ER membrane protein complex subunit 7 OS=Homo sapiens OX=9606 GN=EMC7 PE=1 SV=1	0	40	6	6	242	-1.02006	2.09887	131	69
Q7Z3D4	LysM and putative peptidoglycan-binding domain-containing protein 3 OS=Homo sapiens OX=9606 GN=LYSMD3 PE=1 SV=2	0	20	3	3	306	-0.992043	1.87883	135.5	64.5
Q8NI22	Multiple coagulation factor deficiency protein 2 OS=Homo sapiens OX=9606 GN=MCFD2 PE=1 SV=1	0.001	12	1	1	146	-0.952334	1.09464	131.9	68.1
Q8N766	ER membrane protein complex subunit 1 OS=Homo sapiens OX=9606 GN=EMC1 PE=1 SV=1	0	38	26	26	993	-0.903038	1.8145	130.3	69.7
O43829	Zinc finger and BTB domain-containing protein 14 OS=Homo sapiens OX=9606 GN=ZBTB14 PE=1 SV=2	0	15	4	4	449	-0.889863	1.73103	129.7	70.3
Q7L3S4	Zinc finger protein 771 OS=Homo sapiens OX=9606 GN=ZNF771 PE=1 SV=1	0	8	1	1	317	-0.88049	1.51099	107.9	92.1
P58317	Zinc finger protein 121 OS=Homo sapiens OX=9606 GN=ZNF121 PE=3 SV=2	0	9	2	2	390	-0.868687	1.20124	127.1	72.9
P29084	Transcription initiation factor IIE subunit beta OS=Homo sapiens OX=9606 GN=GTF2E2 PE=1 SV=1	0	13	3	3	291	-0.84559	0.655912	128.5	71.5
Q969F1	General transcription factor 3C polypeptide 6 OS=Homo sapiens OX=9606 GN=GTF3C6 PE=1 SV=1	0.003	7	1	1	213	-0.83996	0.872487	128.3	71.7
P51161-2	Isoform 2 of Gastrotropin OS=Homo sapiens OX=9606 GN=FABP6	0	18	2	2	177	-0.827819	1.27117	109.5	90.5
Q16666	Gamma-interferon-inducible protein 16 OS=Homo sapiens OX=9606 GN=IFI16 PE=1 SV=3	0	7	3	3	785	-0.817214	1.02029	134.1	65.9
P01033	Metalloproteinase inhibitor 1 OS=Homo sapiens OX=9606 GN=TIMP1 PE=1 SV=1	0.006	6	1	1	207	-0.807355	1.18576	127.3	72.7
Q8WUF8	Cotranscriptional regulator FAM172A OS=Homo sapiens OX=9606 GN=FAM172A PE=2 SV=1	0	6	2	2	416	-0.792439	0.693728	127.1	72.9
Q9BWS9-3	Isoform 3 of Chitinase domain-containing protein 1 OS=Homo sapiens OX=9606 GN=CHID1	0	38	10	1	362	-0.761285	0.582178	125.8	74.2
Q6NSJ5	Volume-regulated anion channel subunit LRRC8E OS=Homo sapiens OX=9606 GN=LRRC8E PE=1 SV=2	0	26	14	14	796	-0.738119	0.864979	115.8	84.2
E7EPA6	Laminin subunit beta-1 OS=Homo sapiens OX=9606 GN=LAMB1 PE=1 SV=1	0	36	16	1	850	-0.719841	0.505099	124.9	75.1
Q7Z6B7	SLIT-ROBO Rho GTPase-activating protein 1 OS=Homo sapiens OX=9606 GN=SRGAP1 PE=1 SV=1	0	7	5	4	1085	-0.711935	0.734855	133.9	66.1
Q13740	CD166 antigen OS=Homo sapiens OX=9606 GN=ALCAM PE=1 SV=2	0	5	2	2	583	-0.70044	0.612985	125.4	74.6
Q9P031	Thyroid transcription factor 1-associated protein 26 OS=Homo sapiens OX=9606 GN=CCDC59 PE=1 SV=2	0	14	3	3	241	-0.698663	0.799424	123.1	76.9
P06276	Cholinesterase OS=Homo sapiens OX=9606 GN=BCHE PE=1 SV=1	0	10	4	4	602	-0.698663	0.818795	123.2	76.8
A0A0A0MQS1	Pyrroline-5-carboxylate reductase OS=Homo sapiens OX=9606 GN=PYCR3 PE=1 SV=1	0	27	5	5	286	-0.690641	0.804771	124.2	75.8
P00167	Cytochrome b5 OS=Homo sapiens OX=9606 GN=CYB5A PE=1 SV=2	0	33	3	3	134	-0.688852	0.764569	123.2	76.8
Q6NXH9	Keratin, type II cytoskeletal 73 OS=Mus musculus GN=Krt73 PE=1 SV=1	0	12	5	1	539	-0.685267	0.386916	121.5	78.5
P37268	Squalene synthase OS=Homo sapiens OX=9606 GN=FDFT1 PE=1 SV=1	0	32	10	10	417	-0.680774	0.800025	120.1	79.9
Q9H6F5	Coiled-coil domain-containing protein 86 OS=Homo sapiens OX=9606 GN=CCDC86 PE=1 SV=1	0.002	8	2	2	360	-0.667211	0.457344	122.7	77.3
Q9H116	GDNF-inducible zinc finger protein 1 OS=Homo sapiens OX=9606 GN=GZF1 PE=1 SV=1	0	8	4	4	711	-0.639695	0.631064	118.4	81.6
Q9H497	Torsin-3A OS=Homo sapiens OX=9606 GN=TOR3A PE=1 SV=1	0	30	10	10	397	-0.632268	0.64773	117.7	82.3
P58166	Inhibin beta E chain OS=Homo sapiens OX=9606 GN=INHBE PE=1 SV=1	0	12	3	3	350	-0.608809	0.551519	123.7	76.3
O75461	Transcription factor E2F6 OS=Homo sapiens OX=9606 GN=E2F6 PE=1 SV=1	0.001	5	1	1	281	-0.60502	0.504565	120.8	79.2
Q9H2C2	Protein ARV1 OS=Homo sapiens OX=9606 GN=ARV1 PE=1 SV=1	0	11	2	2	271	-0.602172	0.457686	153.9	46.1
Q9UBS3	DnaJ homolog subfamily B member 9 OS=Homo sapiens OX=9606 GN=DNAJB9 PE=1 SV=1	0	28	4	4	223	-0.601221	0.585492	119.1	80.9
Q92626	Peroxidasin homolog OS=Homo sapiens OX=9606 GN=PXDN PE=1 SV=2	0	12	12	12	1479	-0.599318	0.6333	120.7	79.3
O75973	C1q-related factor OS=Homo sapiens OX=9606 GN=C1QL1 PE=1 SV=1	0.006	7	1	1	258	-0.596458	0.289651	120.4	79.6
Q9UGY1	Nucleolar protein 12 OS=Homo sapiens OX=9606 GN=NOL12 PE=1 SV=1	0	23	3	3	213	-0.592636	0.54681	137.3	62.7
Q13085	Acetyl-CoA carboxylase 1 OS=Homo sapiens OX=9606 GN=ACACA PE=1 SV=2	0	52	87	87	2346	-0.592636	0.593025	120.3	79.7
O95625	Zinc finger and BTB domain-containing protein 11 OS=Homo sapiens OX=9606 GN=ZBTB11 PE=1 SV=2	0	8	7	7	1053	-0.590722	0.615621	135.2	64.8
Q96S66	Chloride channel CLIC-like protein 1 OS=Homo sapiens OX=9606 GN=CLCC1 PE=1 SV=1	0	18	8	8	551	-0.588805	0.584714	116.9	83.1
P10620	Microsomal glutathione S-transferase 1 OS=Homo sapiens OX=9606 GN=MGST1 PE=1 SV=1	0	26	3	3	155	-0.588805	0.513861	119.5	80.5
Q9H0M0	NEDD4-like E3 ubiquitin-protein ligase WWP1 OS=Homo sapiens OX=9606 GN=WWP1 PE=1 SV=1	0	5	3	2	922	-0.587845	0.354526	115.1	84.9
P01040	Cystatin-A OS=Homo sapiens OX=9606 GN=CSTA PE=1 SV=1	0.001	18	1	1	98	-0.584	0.258105	117.5	82.5
Q6SJ93	Protein FAM111B OS=Homo sapiens OX=9606 GN=FAM111B PE=1 SV=1	0	35	18	18	734	-0.569491	0.532291	118.9	81.1
Q9HBL7	Plasminogen receptor (KT) OS=Homo sapiens OX=9606 GN=PLGRKT PE=1 SV=1	0	12	2	2	147	-0.568519	0.559554	119.1	80.9
O43159	Ribosomal RNA-processing protein 8 OS=Homo sapiens OX=9606 GN=RRP8 PE=1 SV=2	0	20	6	6	456	-0.565597	0.530553	119.7	80.3
Q99615	DnaJ homolog subfamily C member 7 OS=Homo sapiens OX=9606 GN=DNAJC7 PE=1 SV=2	0	10	4	4	494	-0.563646	0.445012	119.6	80.4
Q6PK81	Zinc finger protein 773 OS=Homo sapiens OX=9606 GN=ZNF773 PE=2 SV=1	0	5	2	1	442	-0.56267	0.376799	119.3	80.7
P45877	Peptidyl-prolyl cis-trans isomerase C OS=Homo sapiens OX=9606 GN=PPIC PE=1 SV=1	0	10	2	2	212	-0.555816	0.550012	111	89
Q92611	ER degradation-enhancing alpha-mannosidase-like protein 1 OS=Homo sapiens OX=9606 GN=EDEM1 PE=1 SV=1	0	9	5	5	657	-0.547943	0.41617	132.9	67.1
Q9HD20	Manganese-transporting ATPase 13A1 OS=Homo sapiens OX=9606 GN=ATP13A1 PE=1 SV=2	0	5	5	5	1204	-0.54201	0.417326	116	84
A0A1B0GU06	Acid ceramidase OS=Homo sapiens OX=9606 GN=ASAH1 PE=1 SV=1	0	28	4	1	191	-0.54201	0.349285	118.9	81.1
Q9Y2X9	Zinc finger protein 281 OS=Homo sapiens OX=9606 GN=ZNF281 PE=1 SV=1	0	24	11	11	895	-0.539035	0.460734	119.4	80.6
O43615	Mitochondrial import inner membrane translocase subunit TIM44 OS=Homo sapiens OX=9606 GN=TIMM44 PE=1 SV=2	0	23	8	8	452	-0.535058	0.437648	117.3	82.7
Q5JRA6	Transport and Golgi organization protein 1 homolog OS=Homo sapiens OX=9606 GN=MIA3 PE=1 SV=1	0	48	64	64	1907	-0.530071	0.441099	119	81
O15173-2	Isoform 2 of Membrane-associated progesterone receptor component 2 OS=Homo sapiens OX=9606 GN=PGRMC2	0	37	10	9	247	-0.530071	0.438369	123.7	76.3
A0A087WVF4	Chromodomain-helicase-DNA-binding protein 1 (Fragment) OS=Homo sapiens OX=9606 GN=CHD1 PE=1 SV=1	0	19	3	1	272	-0.528071	0.201865	122.7	77.3
Q9Y680	Peptidyl-prolyl cis-trans isomerase FKBP7 OS=Homo sapiens OX=9606 GN=FKBP7 PE=1 SV=2	0	28	6	6	222	-0.525067	0.432425	116.4	83.6
Q6IQ21	Zinc finger protein 770 OS=Homo sapiens OX=9606 GN=ZNF770 PE=1 SV=1	0	11	6	6	691	-0.521051	0.441136	117.7	82.3
Q6ZXV5	Protein O-mannosyl-transferase TMTC3 OS=Homo sapiens OX=9606 GN=TMTC3 PE=1 SV=2	0	33	23	22	915	-0.520045	0.418988	117.3	82.7
Q96BU1	S100P-binding protein OS=Homo sapiens OX=9606 GN=S100PBP PE=1 SV=1	0	6	2	2	408	-0.516015	0.220486	125.8	74.2
Q9C005	Protein dpy-30 homolog OS=Homo sapiens OX=9606 GN=DPY30 PE=1 SV=1	0	25	2	2	99	-0.512985	0.340602	117.8	82.2
P26022	Pentraxin-related protein PTX3 OS=Homo sapiens OX=9606 GN=PTX3 PE=1 SV=3	0	10	3	3	381	-0.512985	0.332688	114.9	85.1
Q9HB21	Pleckstrin homology domain-containing family A member 1 OS=Homo sapiens OX=9606 GN=PLEKHA1 PE=1 SV=2	0	5	2	2	404	-0.509949	0.246358	154.6	45.4
F5H872	Mediator of RNA polymerase II transcription subunit 21 OS=Homo sapiens OX=9606 GN=MED21 PE=1 SV=1	0	20	2	2	159	-0.509949	0.367874	119.7	80.3
Q8NCW5	NAD(P)H-hydrate epimerase OS=Homo sapiens OX=9606 GN=NAXE PE=1 SV=2	0	26	5	5	288	-0.505891	0.366843	117.6	82.4
Q16600	Zinc finger protein 239 OS=Homo sapiens OX=9606 GN=ZNF239 PE=1 SV=3	0	6	2	2	458	-0.505891	0.22532	113.5	86.5
O00303	Eukaryotic translation initiation factor 3 subunit F OS=Homo sapiens OX=9606 GN=EIF3F PE=1 SV=1	0	8	2	2	357	-0.500802	0.204099	117.2	82.8
E9PCX5	Transmembrane protein 161B OS=Homo sapiens OX=9606 GN=TMEM161B PE=1 SV=1	0	7	3	3	502	-0.499782	0.337317	118.4	81.6
Q8TA86	Retinitis pigmentosa 9 protein OS=Homo sapiens OX=9606 GN=RP9 PE=1 SV=2	0	28	5	5	221	-0.498761	0.349285	114.5	85.5
J3KTH2	HCG38478, isoform CRA_a OS=Homo sapiens OX=9606 GN=TAF4B PE=1 SV=1	0	6	4	3	867	-0.498761	0.193628	168.8	31.2
Q8NDX5-7	Isoform 7 of Polyhomeotic-like protein 3 OS=Homo sapiens OX=9606 GN=PHC3	0	9	5	4	995	-0.49774	0.309443	119.7	80.3
Q8TEQ8	GPI ethanolamine phosphate transferase 3 OS=Homo sapiens OX=9606 GN=PIGO PE=1 SV=3	0	21	18	17	1089	-0.495695	0.361328	116	84
Q9HAT2	Sialate O-acetylesterase OS=Homo sapiens OX=9606 GN=SIAE PE=1 SV=1	0	10	4	4	523	-0.493647	0.281505	102.3	97.7
Q9HDC5	Junctophilin-1 OS=Homo sapiens OX=9606 GN=JPH1 PE=1 SV=2	0	17	7	7	661	-0.492622	0.339978	111.5	88.5
P49748-3	Isoform 3 of Very long-chain specific acyl-CoA dehydrogenase, mitochondrial OS=Homo sapiens OX=9606 GN=ACADVL	0	6	3	3	678	-0.491597	0.144494	116.9	83.1
H7BXT3	Proprotein convertase subtilisin/kexin type 6 OS=Homo sapiens OX=9606 GN=PCSK6 PE=1 SV=2	0	33	13	1	664	-0.49057	0.185834	117.2	82.8
Q9BVP2	Guanine nucleotide-binding protein-like 3 OS=Homo sapiens OX=9606 GN=GNL3 PE=1 SV=2	0	36	15	15	549	-0.485427	0.339978	115.9	84.1
Q13257	Mitotic spindle assembly checkpoint protein MAD2A OS=Homo sapiens OX=9606 GN=MAD2L1 PE=1 SV=1	0	8	1	1	205	-0.485427	0.17933	116.7	83.3
Q5VV89	Microsomal glutathione S-transferase 3 OS=Homo sapiens OX=9606 GN=MGST3 PE=1 SV=1	0	16	2	2	166	-0.483364	0.306153	117.4	82.6
Q9Y3A4	Ribosomal RNA-processing protein 7 homolog A OS=Homo sapiens OX=9606 GN=RRP7A PE=1 SV=2	0	19	3	3	280	-0.482332	0.302257	109.1	90.9
Q9Y3E0	Vesicle transport protein GOT1B OS=Homo sapiens OX=9606 GN=GOLT1B PE=1 SV=1	0.004	10	1	1	138	-0.480265	0.129299	113.6	86.4
Q9BRU9	rRNA-processing protein UTP23 homolog OS=Homo sapiens OX=9606 GN=UTP23 PE=1 SV=2	0	12	2	2	249	-0.480265	0.254201	138.8	61.2
Q9H1B5	Xylosyltransferase 2 OS=Homo sapiens OX=9606 GN=XYLT2 PE=1 SV=2	0	9	6	6	865	-0.479231	0.25913	116.3	83.7
Q969J2	Zinc finger protein with KRAB and SCAN domains 4 OS=Homo sapiens OX=9606 GN=ZKSCAN4 PE=1 SV=1	0	10	4	4	545	-0.478195	0.264904	105.7	94.3
O60858-3	Isoform 3 of E3 ubiquitin-protein ligase TRIM13 OS=Homo sapiens OX=9606 GN=TRIM13	0	6	2	2	410	-0.477159	0.193628	118.2	81.8
Q8ND56	Protein LSM14 homolog A OS=Homo sapiens OX=9606 GN=LSM14A PE=1 SV=3	0	7	3	3	463	-0.471968	0.271308	116.3	83.7
Q12923-3	Isoform 3 of Tyrosine-protein phosphatase non-receptor type 13 OS=Homo sapiens OX=9606 GN=PTPN13	0	36	65	65	2466	-0.471968	0.311941	113.6	86.4
Q86WZ6	Zinc finger protein 227 OS=Homo sapiens OX=9606 GN=ZNF227 PE=1 SV=1	0	10	6	6	799	-0.467801	0.328451	114.6	85.4
Q8TDD1-2	Isoform 2 of ATP-dependent RNA helicase DDX54 OS=Homo sapiens OX=9606 GN=DDX54	0	41	28	27	882	-0.465713	0.296194	108.9	91.1
Q8IVF7	Formin-like protein 3 OS=Homo sapiens OX=9606 GN=FMNL3 PE=1 SV=3	0	15	14	9	1028	-0.465713	0.28222	115.4	84.6
Q8WY36	HMG box transcription factor BBX OS=Homo sapiens OX=9606 GN=BBX PE=1 SV=1	0	26	14	14	941	-0.459432	0.274185	116.3	83.7
Q8N0Z3	Spindle and centriole-associated protein 1 OS=Homo sapiens OX=9606 GN=SPICE1 PE=1 SV=1	0	7	5	5	855	-0.45628	0.245322	115.7	84.3
Q9P206-2	Isoform 2 of Uncharacterized protein KIAA1522 OS=Homo sapiens OX=9606 GN=KIAA1522	0	16	10	10	1094	-0.455229	0.24041	116.4	83.6
Q8WTV1-3	Isoform 2 of THAP domain-containing protein 3 OS=Homo sapiens OX=9606 GN=THAP3	0.003	11	2	2	238	-0.449957	0.104578	116.8	83.2
O00767	Acyl-CoA desaturase OS=Homo sapiens OX=9606 GN=SCD PE=1 SV=2	0	11	3	3	359	-0.449957	0.230039	118.8	81.2
A0A3B3IUB5	Minor histocompatibility antigen H13 OS=Homo sapiens OX=9606 GN=HM13 PE=1 SV=1	0	14	5	5	420	-0.447844	0.216464	115.4	84.6
F8W031	DUF3456 domain-containing protein (Fragment) OS=Homo sapiens OX=9606 PE=1 SV=1	0	10	2	2	263	-0.446786	0.204558	112.5	87.5
Q6UX07	Dehydrogenase/reductase SDR family member 13 OS=Homo sapiens OX=9606 GN=DHRS13 PE=2 SV=1	0	9	3	3	377	-0.441483	0.150933	131.4	68.6
Q9HB58-7	Isoform 7 of Sp110 nuclear body protein OS=Homo sapiens OX=9606 GN=SP110	0	17	7	7	555	-0.440421	0.218782	117.4	82.6
Q9BVS4	Serine/threonine-protein kinase RIO2 OS=Homo sapiens OX=9606 GN=RIOK2 PE=1 SV=2	0	18	6	6	552	-0.440421	0.214638	113.2	86.8
Q86YL7-3	Isoform 3 of Podoplanin OS=Homo sapiens OX=9606 GN=PDPN	0.003	14	1	1	238	-0.439357	0.195655	115.1	84.9
P07355	Annexin A2 OS=Homo sapiens OX=9606 GN=ANXA2 PE=1 SV=2	0	35	12	12	339	-0.436162	0.22195	113.9	86.1
G3V2S9	SRA stem-loop-interacting RNA-binding protein, mitochondrial OS=Homo sapiens OX=9606 GN=SLIRP PE=1 SV=1	0	28	3	3	124	-0.432959	0.21212	107.7	92.3
K7EJ20	Glutathione peroxidase OS=Homo sapiens OX=9606 GN=GPX4 PE=1 SV=3	0.01	6	1	1	242	-0.43082	0.0955932	115	85
Q8TF39	Zinc finger protein 483 OS=Homo sapiens OX=9606 GN=ZNF483 PE=1 SV=3	0	15	9	9	744	-0.42975	0.197649	114.4	85.6
Q9BXY0	Protein MAK16 homolog OS=Homo sapiens OX=9606 GN=MAK16 PE=1 SV=2	0.001	5	1	1	300	-0.428678	0.129976	116.8	83.2
Q96HD1-2	Isoform 2 of Protein disulfide isomerase CRELD1 OS=Homo sapiens OX=9606 GN=CRELD1	0	18	4	4	422	-0.428678	0.193036	117	83
O14786	Neuropilin-1 OS=Homo sapiens OX=9606 GN=NRP1 PE=1 SV=3	0	6	4	4	923	-0.428678	0.202318	130.4	69.6
O00257	E3 SUMO-protein ligase CBX4 OS=Homo sapiens OX=9606 GN=CBX4 PE=1 SV=3	0	12	4	4	560	-0.428678	0.193776	113.7	86.3
Q96RQ3	Methylcrotonoyl-CoA carboxylase subunit alpha, mitochondrial OS=Homo sapiens OX=9606 GN=MCCC1 PE=1 SV=3	0	54	24	24	725	-0.427606	0.219566	115	85
Q86XR7-2	Isoform 2 of TIR domain-containing adapter molecule 2 OS=Homo sapiens OX=9606 GN=TICAM2	0	5	2	2	404	-0.422233	0.188061	108.3	91.7
Q9GZP9	Derlin-2 OS=Homo sapiens OX=9606 GN=DERL2 PE=1 SV=1	0.001	5	1	1	239	-0.421156	0.210496	114.2	85.8
Q99741	Cell division control protein 6 homolog OS=Homo sapiens OX=9606 GN=CDC6 PE=1 SV=1	0	7	3	3	560	-0.421156	0.193776	114.4	85.6
Q5T8D3-3	Isoform 3 of Acyl-CoA-binding domain-containing protein 5 OS=Homo sapiens OX=9606 GN=ACBD5	0	18	7	7	525	-0.420078	0.21212	112.2	87.8
Q8N2A8	Mitochondrial cardiolipin hydrolase OS=Homo sapiens OX=9606 GN=PLD6 PE=1 SV=1	0.001	5	1	1	252	-0.418999	0.0903073	112	88
Q9ULK5	Vang-like protein 2 OS=Homo sapiens OX=9606 GN=VANGL2 PE=1 SV=2	0	10	4	4	521	-0.41684	0.201451	114.7	85.3
P00367	Glutamate dehydrogenase 1, mitochondrial OS=Homo sapiens OX=9606 GN=GLUD1 PE=1 SV=2	0	33	13	13	558	-0.413594	0.193628	112	88
O43663-4	Isoform 4 of Protein regulator of cytokinesis 1 OS=Homo sapiens OX=9606 GN=PRC1	0	36	17	1	606	-0.413594	0.193628	114.3	85.7
Q9BVX2	Transmembrane protein 106C OS=Homo sapiens OX=9606 GN=TMEM106C PE=1 SV=1	0	20	2	2	250	-0.412511	0.193628	114.3	85.7
Q3KQU3	MAP7 domain-containing protein 1 OS=Homo sapiens OX=9606 GN=MAP7D1 PE=1 SV=1	0	20	10	10	841	-0.412511	0.199747	114	86
Q3KP31	Zinc finger protein 791 OS=Homo sapiens OX=9606 GN=ZNF791 PE=2 SV=1	0	7	4	3	576	-0.411426	0.118563	107.6	92.4
Q7L804-2	Isoform 2 of Rab11 family-interacting protein 2 OS=Homo sapiens OX=9606 GN=RAB11FIP2	0	15	6	5	532	-0.408168	0.17299	111.6	88.4
Q16533	snRNA-activating protein complex subunit 1 OS=Homo sapiens OX=9606 GN=SNAPC1 PE=1 SV=1	0	8	3	3	368	-0.408168	0.107226	115.7	84.3
P00750	Tissue-type plasminogen activator OS=Homo sapiens OX=9606 GN=PLAT PE=1 SV=1	0	11	4	4	562	-0.408168	0.177148	112.9	87.1
J3KQR7	Centrosomal protein of 170 kDa protein B OS=Homo sapiens OX=9606 GN=CEP170B PE=1 SV=1	0	9	10	9	1590	-0.408168	0.18169	101.1	98.9
Q2NL82	Pre-rRNA-processing protein TSR1 homolog OS=Homo sapiens OX=9606 GN=TSR1 PE=1 SV=1	0	35	19	19	804	-0.403813	0.191371	114	86
O75190	DnaJ homolog subfamily B member 6 OS=Homo sapiens OX=9606 GN=DNAJB6 PE=1 SV=2	0	17	4	4	326	-0.402722	0.168483	113	87
Q03468	DNA excision repair protein ERCC-6 OS=Homo sapiens OX=9606 GN=ERCC6 PE=1 SV=1	0	23	21	15	1493	-0.40163	0.195655	112.3	87.7
Q9NWT8	Aurora kinase A-interacting protein OS=Homo sapiens OX=9606 GN=AURKAIP1 PE=1 SV=1	0	21	3	3	199	-0.400538	0.0763048	113.8	86.2
Q96NY9	Crossover junction endonuclease MUS81 OS=Homo sapiens OX=9606 GN=MUS81 PE=1 SV=3	0	18	7	7	551	-0.400538	0.147927	112.9	87.1
Q8WY91	THAP domain-containing protein 4 OS=Homo sapiens OX=9606 GN=THAP4 PE=1 SV=2	0	13	5	5	577	-0.400538	0.160209	112.7	87.3
Q15907	Ras-related protein Rab-11B OS=Homo sapiens OX=9606 GN=RAB11B PE=1 SV=4	0	47	9	9	218	-0.397255	0.156857	112.6	87.4
O60524	Nuclear export mediator factor NEMF OS=Homo sapiens OX=9606 GN=NEMF PE=1 SV=4	0	8	7	7	1076	-0.397255	0.177873	105.9	94.1
O43169	Cytochrome b5 type B OS=Homo sapiens OX=9606 GN=CYB5B PE=1 SV=3	0	49	4	4	150	-0.397255	0.163702	115.5	84.5
Q9NT22	EMILIN-3 OS=Homo sapiens OX=9606 GN=EMILIN3 PE=1 SV=2	0	5	2	2	766	-0.392867	0.0970969	114.7	85.3
Q9Y320	Thioredoxin-related transmembrane protein 2 OS=Homo sapiens OX=9606 GN=TMX2 PE=1 SV=1	0	11	3	3	296	-0.391768	0.154078	112.9	87.1
P51946	Cyclin-H OS=Homo sapiens OX=9606 GN=CCNH PE=1 SV=1	0	17	4	4	323	-0.391768	0.171861	111.7	88.3
E9PEB5	Far upstream element-binding protein 1 OS=Homo sapiens OX=9606 GN=FUBP1 PE=1 SV=1	0	13	7	5	655	-0.391768	0.178059	113.4	86.6
Q9P0V3	SH3 domain-binding protein 4 OS=Homo sapiens OX=9606 GN=SH3BP4 PE=1 SV=1	0	29	20	20	963	-0.387363	0.163702	111.2	88.8
Q9UGN5	Poly [ADP-ribose] polymerase 2 OS=Homo sapiens OX=9606 GN=PARP2 PE=1 SV=2	0	14	6	6	583	-0.386259	0.143781	146.6	53.4
Q96EK4	THAP domain-containing protein 11 OS=Homo sapiens OX=9606 GN=THAP11 PE=1 SV=2	0	11	3	3	314	-0.381837	0.161302	112.6	87.4
P51572-2	Isoform 2 of B-cell receptor-associated protein 31 OS=Homo sapiens OX=9606 GN=BCAP31	0	5	1	1	313	-0.381837	0.13164	105.9	94.1
Q13232	Nucleoside diphosphate kinase 3 OS=Homo sapiens OX=9606 GN=NME3 PE=1 SV=2	0	44	5	5	169	-0.380729	0.147596	113.3	86.7
O75460	Serine/threonine-protein kinase/endoribonuclease IRE1 OS=Homo sapiens OX=9606 GN=ERN1 PE=1 SV=2	0	29	18	18	977	-0.379621	0.156831	116.1	83.9
Q5VWQ0	Lysine-specific demethylase 9 OS=Homo sapiens OX=9606 GN=RSBN1 PE=1 SV=2	0	20	10	10	802	-0.378512	0.147901	111.7	88.3
A6XMV9	Protease serine 2 preproprotein OS=Homo sapiens OX=9606 GN=PRSS2 PE=1 SV=1	0.001	8	1	1	261	-0.37629	0.142427	113	87
Q00535	Cyclin-dependent-like kinase 5 OS=Homo sapiens OX=9606 GN=CDK5 PE=1 SV=3	0	28	7	6	292	-0.375178	0.142198	112.7	87.3
P49757	Protein numb homolog OS=Homo sapiens OX=9606 GN=NUMB PE=1 SV=2	0	12	5	5	651	-0.375178	0.16375	128	72
O15258	Protein RER1 OS=Homo sapiens OX=9606 GN=RER1 PE=1 SV=1	0	30	4	4	196	-0.375178	0.131077	112.6	87.4
Q9Y3B9	RRP15-like protein OS=Homo sapiens OX=9606 GN=RRP15 PE=1 SV=2	0	19	4	4	282	-0.372952	0.13724	113.5	86.5
Q9HC52	Chromobox protein homolog 8 OS=Homo sapiens OX=9606 GN=CBX8 PE=1 SV=3	0	13	3	3	389	-0.372952	0.102048	139.6	60.4
P56730	Neurotrypsin OS=Homo sapiens OX=9606 GN=PRSS12 PE=2 SV=2	0	10	7	7	875	-0.372952	0.123116	112.5	87.5
Q9BRK5	45 kDa calcium-binding protein OS=Homo sapiens OX=9606 GN=SDF4 PE=1 SV=1	0	27	6	6	362	-0.371838	0.140389	112	88
Q96P47-4	Isoform 4 of Arf-GAP with GTPase, ANK repeat and PH domain-containing protein 3 OS=Homo sapiens OX=9606 GN=AGAP3	0	9	6	5	911	-0.371838	0.156325	98.5	101.5
P78348-1	Isoform 1 of Acid-sensing ion channel 1 OS=Homo sapiens OX=9606 GN=ASIC1	0	11	5	5	574	-0.370722	0.126608	109.2	90.8
P52789	Hexokinase-2 OS=Homo sapiens OX=9606 GN=HK2 PE=1 SV=2	0	25	18	14	917	-0.370722	0.140331	111	89
Q9UL54-2	Isoform 2 of Serine/threonine-protein kinase TAO2 OS=Homo sapiens OX=9606 GN=TAOK2	0	21	16	5	1049	-0.367371	0.121002	112.8	87.2
P56159	GDNF family receptor alpha-1 OS=Homo sapiens OX=9606 GN=GFRA1 PE=1 SV=2	0	9	3	3	465	-0.367371	0.116444	111.7	88.3
Q96PC5	Melanoma inhibitory activity protein 2 OS=Homo sapiens OX=9606 GN=MIA2 PE=1 SV=4	0	28	32	32	1412	-0.366252	0.134825	104.8	95.2
Q8WVC6	Dephospho-CoA kinase domain-containing protein OS=Homo sapiens OX=9606 GN=DCAKD PE=1 SV=1	0	19	5	5	231	-0.364012	0.120873	114.4	85.6
Q9BVK6	Transmembrane emp24 domain-containing protein 9 OS=Homo sapiens OX=9606 GN=TMED9 PE=1 SV=2	0	26	5	4	235	-0.362891	0.129639	113.5	86.5
Q6MZW2	Follistatin-related protein 4 OS=Homo sapiens OX=9606 GN=FSTL4 PE=2 SV=3	0	5	3	3	842	-0.362891	0.115465	122.5	77.5
Q3YEC7	Rab-like protein 6 OS=Homo sapiens OX=9606 GN=RABL6 PE=1 SV=2	0	22	12	12	729	-0.362891	0.122068	113.4	86.6
F8WA39	Myotubularin-related protein 1 OS=Homo sapiens OX=9606 GN=MTMR1 PE=1 SV=1	0	21	10	9	673	-0.362891	0.127339	109.8	90.2
P18031	Tyrosine-protein phosphatase non-receptor type 1 OS=Homo sapiens OX=9606 GN=PTPN1 PE=1 SV=1	0	26	9	9	435	-0.361768	0.116444	114.5	85.5
Q8N6G5	Chondroitin sulfate N-acetylgalactosaminyltransferase 2 OS=Homo sapiens OX=9606 GN=CSGALNACT2 PE=1 SV=1	0	5	2	2	542	-0.359521	0.0903073	110.2	89.8
Q14119	Vascular endothelial zinc finger 1 OS=Homo sapiens OX=9606 GN=VEZF1 PE=1 SV=2	0.001	6	2	2	521	-0.359521	0.112022	109.1	90.9
Q9HCM4	Band 4.1-like protein 5 OS=Homo sapiens OX=9606 GN=EPB41L5 PE=1 SV=3	0	21	9	9	733	-0.35727	0.112475	111.2	88.8
Q96CP6	Protein Aster-A OS=Homo sapiens OX=9606 GN=GRAMD1A PE=1 SV=2	0	42	22	21	724	-0.35727	0.123116	112.1	87.9
Q8IXK0-5	Isoform 5 of Polyhomeotic-like protein 2 OS=Homo sapiens OX=9606 GN=PHC2	0	12	8	7	859	-0.356144	0.115465	111.2	88.8
Q49MG5	Microtubule-associated protein 9 OS=Homo sapiens OX=9606 GN=MAP9 PE=1 SV=3	0	11	6	6	647	-0.356144	0.145234	114.9	85.1
Q96AQ6	Pre-B-cell leukemia transcription factor-interacting protein 1 OS=Homo sapiens OX=9606 GN=PBXIP1 PE=1 SV=1	0	18	11	11	731	-0.355016	0.147927	110.2	89.8
P81605-2	Isoform 2 of Dermcidin OS=Homo sapiens OX=9606 GN=DCD	0.001	9	1	1	121	-0.355016	0.118929	112.2	87.8
P17706	Tyrosine-protein phosphatase non-receptor type 2 OS=Homo sapiens OX=9606 GN=PTPN2 PE=1 SV=2	0	6	2	2	415	-0.355016	0.0763048	109.8	90.2
O75683	Surfeit locus protein 6 OS=Homo sapiens OX=9606 GN=SURF6 PE=1 SV=3	0	25	6	6	361	-0.350497	0.12065	108.2	91.8
Q9BZF9	Uveal autoantigen with coiled-coil domains and ankyrin repeats OS=Homo sapiens OX=9606 GN=UACA PE=1 SV=2	0	5	7	7	1416	-0.348232	0.0970969	109.5	90.5
Q6P9A2	Polypeptide N-acetylgalactosaminyltransferase 18 OS=Homo sapiens OX=9606 GN=GALNT18 PE=2 SV=2	0	6	3	3	607	-0.348232	0.0999002	112.3	87.7
P0DP25	Calmodulin-3 OS=Homo sapiens OX=9606 GN=CALM3 PE=1 SV=1	0	29	4	4	149	-0.347099	0.10542	107.6	92.4
Q16560-2	Isoform 2 of U11/U12 small nuclear ribonucleoprotein 35 kDa protein OS=Homo sapiens OX=9606 GN=SNRNP35	0	16	4	4	251	-0.344828	0.0929804	103.9	96.1
O95248-4	Isoform 4 of Myotubularin-related protein 5 OS=Homo sapiens OX=9606 GN=SBF1	0	20	27	26	1894	-0.344828	0.13358	110.1	89.9
Q96IZ7	Serine/Arginine-related protein 53 OS=Homo sapiens OX=9606 GN=RSRC1 PE=1 SV=1	0	26	6	6	334	-0.343692	0.110135	108	92
Q8TBX8	Phosphatidylinositol 5-phosphate 4-kinase type-2 gamma OS=Homo sapiens OX=9606 GN=PIP4K2C PE=1 SV=3	0	11	3	3	421	-0.343692	0.0970969	111	89
P35625	Metalloproteinase inhibitor 3 OS=Homo sapiens OX=9606 GN=TIMP3 PE=1 SV=2	0	32	6	6	211	-0.343692	0.112475	113.6	86.4
P49257	Protein ERGIC-53 OS=Homo sapiens OX=9606 GN=LMAN1 PE=1 SV=2	0	34	11	11	510	-0.342555	0.120546	117.3	82.7
P30532	Neuronal acetylcholine receptor subunit alpha-5 OS=Homo sapiens OX=9606 GN=CHRNA5 PE=1 SV=2	0	6	2	2	468	-0.342555	0.0953722	111.1	88.9
O15269	Serine palmitoyltransferase 1 OS=Homo sapiens OX=9606 GN=SPTLC1 PE=1 SV=1	0	10	3	3	473	-0.342555	0.0968316	109	91
A0A087WU53	Magnesium transporter protein 1 OS=Homo sapiens OX=9606 GN=MAGT1 PE=1 SV=1	0	9	3	3	367	-0.342555	0.0999002	111.3	88.7
Q8N5F7	NF-kappa-B-activating protein OS=Homo sapiens OX=9606 GN=NKAP PE=1 SV=1	0	13	4	4	415	-0.341417	0.116865	111.6	88.4
Q9ULH0	Kinase D-interacting substrate of 220 kDa OS=Homo sapiens OX=9606 GN=KIDINS220 PE=1 SV=3	0	14	20	20	1771	-0.337996	0.0992351	108.4	91.6
Q9P2W9	Syntaxin-18 OS=Homo sapiens OX=9606 GN=STX18 PE=1 SV=1	0.004	5	1	1	335	-0.336855	0.0545145	116.8	83.2
Q9H6E4	Coiled-coil domain-containing protein 134 OS=Homo sapiens OX=9606 GN=CCDC134 PE=1 SV=1	0	31	5	5	229	-0.336855	0.0992351	110.5	89.5
Q96A65	Exocyst complex component 4 OS=Homo sapiens OX=9606 GN=EXOC4 PE=1 SV=1	0	10	7	7	974	-0.336855	0.0970969	110.9	89.1
P10253	Lysosomal alpha-glucosidase OS=Homo sapiens OX=9606 GN=GAA PE=1 SV=4	0	17	9	9	952	-0.335712	0.110283	126.2	73.8
Q8WY22	BRI3-binding protein OS=Homo sapiens OX=9606 GN=BRI3BP PE=1 SV=1	0	8	1	1	251	-0.334568	0.0910299	113.6	86.4
Q86YS7-3	Isoform 3 of C2 domain-containing protein 5 OS=Homo sapiens OX=9606 GN=C2CD5	0	30	19	19	1051	-0.333424	0.0990929	112.6	87.4
O60220	Mitochondrial import inner membrane translocase subunit Tim8 A OS=Homo sapiens OX=9606 GN=TIMM8A PE=1 SV=1	0	23	2	2	97	-0.333424	0.108499	111.2	88.8
O43167	Zinc finger and BTB domain-containing protein 24 OS=Homo sapiens OX=9606 GN=ZBTB24 PE=1 SV=2	0	5	3	3	697	-0.333424	0.088841	109.3	90.7
Q9BWS9-2	Isoform 2 of Chitinase domain-containing protein 1 OS=Homo sapiens OX=9606 GN=CHID1	0	36	10	1	418	-0.332278	0.120938	106.8	93.2
Q6ZWJ1	Syntaxin-binding protein 4 OS=Homo sapiens OX=9606 GN=STXBP4 PE=1 SV=2	0	13	6	6	553	-0.332278	0.0883075	110	90
A0A4W8VYG7	Cell growth regulator with EF hand domain protein 1 OS=Homo sapiens OX=9606 GN=CGREF1 PE=1 SV=1	0.003	6	1	1	301	-0.332278	0.048413	111.5	88.5
Q8IVL5	Prolyl 3-hydroxylase 2 OS=Homo sapiens OX=9606 GN=P3H2 PE=1 SV=1	0	12	7	7	708	-0.331132	0.0824291	111.6	88.4
Q9H3G5	Probable serine carboxypeptidase CPVL OS=Homo sapiens OX=9606 GN=CPVL PE=1 SV=2	0	32	12	12	476	-0.329985	0.117063	110.5	89.5
Q8IVC4	Zinc finger protein 584 OS=Homo sapiens OX=9606 GN=ZNF584 PE=2 SV=1	0	9	3	3	421	-0.328836	0.0545145	102.6	97.4
Q9UJF2-2	Isoform 2 of Ras GTPase-activating protein nGAP OS=Homo sapiens OX=9606 GN=RASAL2	0	20	17	17	1280	-0.327687	0.0945718	113.1	86.9
A0A2R8Y7A4	Centrosomal protein of 78 kDa OS=Homo sapiens OX=9606 GN=CEP78 PE=1 SV=1	0	15	7	7	727	-0.327687	0.0824291	112.5	87.5
Q15363	Transmembrane emp24 domain-containing protein 2 OS=Homo sapiens OX=9606 GN=TMED2 PE=1 SV=1	0	14	2	2	201	-0.326537	0.0929804	110.2	89.8
F2Z2W7	tRNA (uracil-5-)-methyltransferase homolog A OS=Homo sapiens OX=9606 GN=TRMT2A PE=1 SV=1	0	35	19	19	643	-0.326537	0.0927312	110.9	89.1
Q9Y4B5	Microtubule cross-linking factor 1 OS=Homo sapiens OX=9606 GN=MTCL1 PE=1 SV=5	0	5	6	6	1905	-0.325386	0.0720924	110.9	89.1
Q9P1Y6	PHD and RING finger domain-containing protein 1 OS=Homo sapiens OX=9606 GN=PHRF1 PE=1 SV=3	0	22	20	20	1649	-0.325386	0.0970969	112.8	87.2
Q32Q12	Nucleoside diphosphate kinase OS=Homo sapiens OX=9606 GN=NME1-NME2 PE=1 SV=1	0	54	9	9	292	-0.325386	0.0904381	109.2	90.8
Q15629	Translocating chain-associated membrane protein 1 OS=Homo sapiens OX=9606 GN=TRAM1 PE=1 SV=3	0	16	5	5	374	-0.324235	0.0869703	110.6	89.4
Q86US8	Telomerase-binding protein EST1A OS=Homo sapiens OX=9606 GN=SMG6 PE=1 SV=2	0	10	11	11	1419	-0.324235	0.0946927	107.1	92.9
Q14157-5	Isoform 5 of Ubiquitin-associated protein 2-like OS=Homo sapiens OX=9606 GN=UBAP2L	0	6	4	4	1104	-0.323082	0.0639518	106.4	93.6
Q5SVZ6	Zinc finger MYM-type protein 1 OS=Homo sapiens OX=9606 GN=ZMYM1 PE=1 SV=1	0	13	13	13	1142	-0.321928	0.0872839	111	89
Q03167	Transforming growth factor beta receptor type 3 OS=Homo sapiens OX=9606 GN=TGFBR3 PE=1 SV=3	0	6	3	3	851	-0.321928	0.0763048	105.2	94.8
A0A075B7G6	Zinc finger protein 100 OS=Homo sapiens OX=9606 GN=ZNF100 PE=1 SV=2	0	7	3	3	566	-0.321928	0.0766082	102.3	97.7
Q12860	Contactin-1 OS=Homo sapiens OX=9606 GN=CNTN1 PE=1 SV=1	0	5	3	3	1018	-0.319618	0.0545145	113.8	86.2
Q9UHR4	Brain-specific angiogenesis inhibitor 1-associated protein 2-like protein 1 OS=Homo sapiens OX=9606 GN=BAIAP2L1 PE=1 SV=2	0	31	12	12	511	-0.318461	0.08303	111.7	88.3
Q96GC9	Vacuole membrane protein 1 OS=Homo sapiens OX=9606 GN=VMP1 PE=1 SV=1	0	9	2	2	406	-0.317304	0.0612914	110.4	89.6
P21796	Voltage-dependent anion-selective channel protein 1 OS=Homo sapiens OX=9606 GN=VDAC1 PE=1 SV=2	0	75	15	14	283	-0.317304	0.0824291	111	89
O94919	Endonuclease domain-containing 1 protein OS=Homo sapiens OX=9606 GN=ENDOD1 PE=1 SV=2	0	28	11	11	500	-0.317304	0.085525	113.5	86.5
Q5SZK8	FRAS1-related extracellular matrix protein 2 OS=Homo sapiens OX=9606 GN=FREM2 PE=1 SV=2	0	7	13	13	3169	-0.316146	0.0714542	110.5	89.5
P45880-1	Isoform 1 of Voltage-dependent anion-selective channel protein 2 OS=Homo sapiens OX=9606 GN=VDAC2	0	54	11	11	309	-0.316146	0.0824291	109.9	90.1
O15042	U2 snRNP-associated SURP motif-containing protein OS=Homo sapiens OX=9606 GN=U2SURP PE=1 SV=2	0	44	32	30	1029	-0.316146	0.0824291	111.5	88.5
Q9H4Z2	Zinc finger protein 335 OS=Homo sapiens OX=9606 GN=ZNF335 PE=1 SV=1	0	6	5	5	1342	-0.314986	0.0682566	98.6	101.4
Q9BWC9	Coiled-coil domain-containing protein 106 OS=Homo sapiens OX=9606 GN=CCDC106 PE=1 SV=1	0	10	2	2	280	-0.314986	0.0545145	106.9	93.1
Q8NCL4	Polypeptide N-acetylgalactosaminyltransferase 6 OS=Homo sapiens OX=9606 GN=GALNT6 PE=2 SV=2	0	6	3	3	622	-0.314986	0.0766082	113	87
Q9NXE8	Pre-mRNA-splicing factor CWC25 homolog OS=Homo sapiens OX=9606 GN=CWC25 PE=1 SV=1	0	10	4	4	425	-0.313826	0.0708293	106.9	93.1
Q9BZI7	Regulator of nonsense transcripts 3B OS=Homo sapiens OX=9606 GN=UPF3B PE=1 SV=1	0	33	13	13	483	-0.313826	0.0802673	111.5	88.5
Q15649	Zinc finger HIT domain-containing protein 3 OS=Homo sapiens OX=9606 GN=ZNHIT3 PE=1 SV=2	0	20	3	3	155	-0.313826	0.0780569	109.9	90.1
Q96AY2-2	Isoform 2 of Crossover junction endonuclease EME1 OS=Homo sapiens OX=9606 GN=EME1	0	9	5	5	583	-0.312665	0.0708293	121.5	78.5
Q6PK18	2-oxoglutarate and iron-dependent oxygenase domain-containing protein 3 OS=Homo sapiens OX=9606 GN=OGFOD3 PE=1 SV=2	0	16	3	3	319	-0.311503	0.0638904	80.1	119.9
Q9Y385	Ubiquitin-conjugating enzyme E2 J1 OS=Homo sapiens OX=9606 GN=UBE2J1 PE=1 SV=2	0	31	7	7	318	-0.31034	0.0767395	123.7	76.3
Q96EP5	DAZ-associated protein 1 OS=Homo sapiens OX=9606 GN=DAZAP1 PE=1 SV=1	0	12	3	3	407	-0.31034	0.0720924	112.1	87.9
Q13425	Beta-2-syntrophin OS=Homo sapiens OX=9606 GN=SNTB2 PE=1 SV=1	0	8	4	4	540	-0.309176	0.0748357	105.8	94.2
P61289-2	Isoform 2 of Proteasome activator complex subunit 3 OS=Homo sapiens OX=9606 GN=PSME3	0	17	4	4	267	-0.308011	0.0682566	109.8	90.2
O60934	Nibrin OS=Homo sapiens OX=9606 GN=NBN PE=1 SV=1	0	33	17	17	754	-0.306846	0.0761161	109.3	90.7
I3L0U5	Coiled-coil domain-containing protein 137 (Fragment) OS=Homo sapiens OX=9606 GN=CCDC137 PE=1 SV=1	0	17	4	4	292	-0.305679	0.0817834	113.8	86.2
Q9NS86	LanC-like protein 2 OS=Homo sapiens OX=9606 GN=LANCL2 PE=1 SV=1	0	20	7	7	450	-0.304511	0.0767395	109.4	90.6
Q13438	Protein OS-9 OS=Homo sapiens OX=9606 GN=OS9 PE=1 SV=1	0	43	23	23	667	-0.304511	0.0720924	108.9	91.1
Q01813	ATP-dependent 6-phosphofructokinase, platelet type OS=Homo sapiens OX=9606 GN=PFKP PE=1 SV=2	0	16	9	9	784	-0.303342	0.0582376	118.7	81.3
O60293	Zinc finger C3H1 domain-containing protein OS=Homo sapiens OX=9606 GN=ZFC3H1 PE=1 SV=3	0	24	33	33	1989	-0.302173	0.0708293	102.5	97.5
A0A494C0W0	Poly(A)-specific ribonuclease PARN OS=Homo sapiens OX=9606 GN=PARN PE=1 SV=1	0	17	10	10	664	-0.302173	0.0824291	108.1	91.9
Q8TC12	Retinol dehydrogenase 11 OS=Homo sapiens OX=9606 GN=RDH11 PE=1 SV=2	0	24	5	5	318	-0.301002	0.0605344	111.1	88.9
Q5T4B2	Inactive glycosyltransferase 25 family member 3 OS=Homo sapiens OX=9606 GN=CERCAM PE=1 SV=1	0	13	5	5	595	-0.301002	0.0570828	114.3	85.7
Q14318-2	Isoform 2 of Peptidyl-prolyl cis-trans isomerase FKBP8 OS=Homo sapiens OX=9606 GN=FKBP8	0	22	6	6	413	-0.298658	0.0720924	109.7	90.3
Q9UPQ3	Arf-GAP with GTPase, ANK repeat and PH domain-containing protein 1 OS=Homo sapiens OX=9606 GN=AGAP1 PE=1 SV=4	0	8	5	4	857	-0.297485	0.0766082	84	116
Q6NYC1-3	Isoform 3 of Bifunctional arginine demethylase and lysyl-hydroxylase JMJD6 OS=Homo sapiens OX=9606 GN=JMJD6	0	12	3	3	414	-0.296311	0.0517523	112.1	87.9
Q9H5J8	TATA box-binding protein-associated factor RNA polymerase I subunit D OS=Homo sapiens OX=9606 GN=TAF1D PE=1 SV=1	0	15	3	3	278	-0.295135	0.0514495	110.1	89.9
Q969L2	Protein MAL2 OS=Homo sapiens OX=9606 GN=MAL2 PE=1 SV=1	0.001	6	1	1	176	-0.295135	0.0486671	109.3	90.7
Q8TD26	Chromodomain-helicase-DNA-binding protein 6 OS=Homo sapiens OX=9606 GN=CHD6 PE=1 SV=4	0	19	39	30	2715	-0.295135	0.0840486	111.4	88.6
Q8NCS4	Transmembrane protein 35B OS=Homo sapiens OX=9606 GN=TMEM35B PE=1 SV=1	0.004	8	1	1	154	-0.295135	0.0519828	103.8	96.2
P78549	Endonuclease III-like protein 1 OS=Homo sapiens OX=9606 GN=NTHL1 PE=1 SV=2	0	29	6	6	312	-0.295135	0.0698428	110.8	89.2
P48357	Leptin receptor OS=Homo sapiens OX=9606 GN=LEPR PE=1 SV=2	0	10	7	7	1165	-0.295135	0.0763298	119.8	80.2
Q9Y618	Nuclear receptor corepressor 2 OS=Homo sapiens OX=9606 GN=NCOR2 PE=1 SV=3	0	5	9	9	2514	-0.293959	0.062566	108	92
Q9BYG4	Partitioning defective 6 homolog gamma OS=Homo sapiens OX=9606 GN=PARD6G PE=1 SV=1	0	11	3	3	376	-0.293959	0.0398683	111.2	88.8
Q14244-7	Isoform 7 of Ensconsin OS=Homo sapiens OX=9606 GN=MAP7	0	18	13	13	771	-0.293959	0.0698428	107.1	92.9
P80303	Nucleobindin-2 OS=Homo sapiens OX=9606 GN=NUCB2 PE=1 SV=3	0	31	9	9	420	-0.293959	0.0639518	110.5	89.5
Q9UNE7	E3 ubiquitin-protein ligase CHIP OS=Homo sapiens OX=9606 GN=STUB1 PE=1 SV=2	0	15	4	4	303	-0.292782	0.0612914	98.9	101.1
Q8IX12	Cell division cycle and apoptosis regulator protein 1 OS=Homo sapiens OX=9606 GN=CCAR1 PE=1 SV=2	0	19	15	15	1150	-0.292782	0.0684008	108.9	91.1
A0A0C4DFZ2	Arylsulfatase A OS=Homo sapiens OX=9606 GN=ARSA PE=1 SV=1	0	11	3	3	509	-0.292782	0.0545145	115.8	84.2
P05165	Propionyl-CoA carboxylase alpha chain, mitochondrial OS=Homo sapiens OX=9606 GN=PCCA PE=1 SV=4	0	53	28	28	728	-0.291604	0.062962	112.1	87.9
Q9HCU5	Prolactin regulatory element-binding protein OS=Homo sapiens OX=9606 GN=PREB PE=1 SV=2	0	58	15	15	417	-0.290424	0.0621437	111.3	88.7
Q8TDN4	CDK5 and ABL1 enzyme substrate 1 OS=Homo sapiens OX=9606 GN=CABLES1 PE=1 SV=2	0	16	8	8	633	-0.290424	0.0556471	104.3	95.7
Q09328	Alpha-1,6-mannosylglycoprotein 6-beta-N-acetylglucosaminyltransferase A OS=Homo sapiens OX=9606 GN=MGAT5 PE=1 SV=1	0	7	4	4	741	-0.290424	0.0621437	108.2	91.8
P17050	Alpha-N-acetylgalactosaminidase OS=Homo sapiens OX=9606 GN=NAGA PE=1 SV=2	0	12	3	3	411	-0.290424	0.0545145	109.4	90.6
H7BY58	Protein-L-isoaspartate O-methyltransferase OS=Homo sapiens OX=9606 GN=PCMT1 PE=1 SV=1	0	19	4	4	286	-0.290424	0.0605344	108.8	91.2
Q9H0X9	Oxysterol-binding protein-related protein 5 OS=Homo sapiens OX=9606 GN=OSBPL5 PE=1 SV=1	0	8	6	4	879	-0.289244	0.0570828	108.4	91.6
Q9UPS8	Ankyrin repeat domain-containing protein 26 OS=Homo sapiens OX=9606 GN=ANKRD26 PE=1 SV=4	0	27	34	34	1710	-0.288063	0.0605344	108.7	91.3
Q7L2Z9	Centromere protein Q OS=Homo sapiens OX=9606 GN=CENPQ PE=1 SV=1	0	32	6	6	268	-0.288063	0.0556471	112.6	87.4
O95503	Chromobox protein homolog 6 OS=Homo sapiens OX=9606 GN=CBX6 PE=1 SV=1	0	17	4	4	412	-0.288063	0.0682155	113.3	86.7
O75400-3	Isoform 3 of Pre-mRNA-processing factor 40 homolog A OS=Homo sapiens OX=9606 GN=PRPF40A	0	25	21	3	939	-0.288063	0.0556471	111.1	88.9
P19367-3	Isoform 3 of Hexokinase-1 OS=Homo sapiens OX=9606 GN=HK1	0	33	25	21	921	-0.286881	0.0598213	109	91
A0A1C7CYX1	ELM2 and SANT domain-containing protein 1 OS=Homo sapiens OX=9606 GN=ELMSAN1 PE=1 SV=1	0	17	14	14	1099	-0.286881	0.0621928	112	88
Q9HCB6	Spondin-1 OS=Homo sapiens OX=9606 GN=SPON1 PE=1 SV=2	0	10	4	4	807	-0.285698	0.0545145	114.6	85.4
O95214-2	Isoform 2 of Leptin receptor overlapping transcript-like 1 OS=Homo sapiens OX=9606 GN=LEPROTL1	0.001	8	1	1	169	-0.285698	0.0545145	109.9	90.1
Q9UBS9	SUN domain-containing ossification factor OS=Homo sapiens OX=9606 GN=SUCO PE=1 SV=1	0	24	21	21	1254	-0.284514	0.0570828	110.3	89.7
Q9BUI4	DNA-directed RNA polymerase III subunit RPC3 OS=Homo sapiens OX=9606 GN=POLR3C PE=1 SV=1	0	8	3	3	534	-0.283329	0.0545145	109.4	90.6
Q8WV22	Non-structural maintenance of chromosomes element 1 homolog OS=Homo sapiens OX=9606 GN=NSMCE1 PE=1 SV=5	0	18	3	3	266	-0.283329	0.0545145	106	94
Q7L945	Zinc finger protein 627 OS=Homo sapiens OX=9606 GN=ZNF627 PE=1 SV=1	0	8	3	2	461	-0.283329	0.0457104	112.9	87.1
Q63HQ2-2	Isoform 2 of Pikachurin OS=Homo sapiens OX=9606 GN=EGFLAM	0	5	4	4	1009	-0.283329	0.0545145	111.2	88.8
P04066	Tissue alpha-L-fucosidase OS=Homo sapiens OX=9606 GN=FUCA1 PE=1 SV=4	0	5	2	2	466	-0.283329	0.0347121	109.8	90.2
Q9NWM8	Peptidyl-prolyl cis-trans isomerase FKBP14 OS=Homo sapiens OX=9606 GN=FKBP14 PE=1 SV=1	0	12	2	2	211	-0.282143	0.052337	108.1	91.9
Q9BQ39	ATP-dependent RNA helicase DDX50 OS=Homo sapiens OX=9606 GN=DDX50 PE=1 SV=1	0	44	22	20	737	-0.282143	0.0556471	104.6	95.4
A0A140T8X7	Lysosomal thioesterase PPT2 OS=Homo sapiens OX=9606 GN=PPT2 PE=1 SV=1	0	20	4	4	308	-0.280956	0.0545145	136.5	63.5
Q9P0M9	39S ribosomal protein L27, mitochondrial OS=Homo sapiens OX=9606 GN=MRPL27 PE=1 SV=1	0	17	2	2	148	-0.279768	0.052337	109.6	90.4
Q99575	Ribonucleases P/MRP protein subunit POP1 OS=Homo sapiens OX=9606 GN=POP1 PE=1 SV=2	0	23	16	16	1024	-0.279768	0.0586878	110.2	89.8
H0Y3D0	Ectonucleoside triphosphate diphosphohydrolase 6 (Fragment) OS=Homo sapiens OX=9606 GN=ENTPD6 PE=1 SV=1	0	32	5	2	295	-0.279768	0.0605344	110.6	89.4
Q8IY92	Structure-specific endonuclease subunit SLX4 OS=Homo sapiens OX=9606 GN=SLX4 PE=1 SV=3	0	15	18	18	1834	-0.27858	0.0545145	110.2	89.8
Q6UWY0	Arylsulfatase K OS=Homo sapiens OX=9606 GN=ARSK PE=1 SV=1	0	10	4	4	536	-0.27858	0.0545145	108.5	91.5
H0Y9X1	Translation machinery-associated protein 16 (Fragment) OS=Homo sapiens OX=9606 GN=TMA16 PE=1 SV=1	0	22	4	4	242	-0.27858	0.0545145	102.1	97.9
A0A0G2JH66	HLA class I histocompatibility antigen, alpha chain F OS=Homo sapiens OX=9606 GN=HLA-F PE=1 SV=1	0	24	8	7	442	-0.27858	0.0545145	108.1	91.9
P54289	Voltage-dependent calcium channel subunit alpha-2/delta-1 OS=Homo sapiens OX=9606 GN=CACNA2D1 PE=1 SV=3	0	18	15	14	1103	-0.27739	0.0570828	105.5	94.5
A0A499FJK2	Transforming growth factor beta OS=Homo sapiens OX=9606 GN=TGFB1 PE=1 SV=1	0	23	6	6	390	-0.27739	0.0556471	110.1	89.9
Q9NV64	Transmembrane protein 39A OS=Homo sapiens OX=9606 GN=TMEM39A PE=2 SV=1	0	13	3	3	488	-0.275007	0.0545145	120.2	79.8
Q13889	General transcription factor IIH subunit 3 OS=Homo sapiens OX=9606 GN=GTF2H3 PE=1 SV=2	0	22	4	4	308	-0.275007	0.0545145	103.2	96.8
P13611	Versican core protein OS=Homo sapiens OX=9606 GN=VCAN PE=1 SV=3	0	6	15	15	3396	-0.275007	0.0559804	112.1	87.9
Q9P2J8	Zinc finger protein 624 OS=Homo sapiens OX=9606 GN=ZNF624 PE=1 SV=3	0	5	3	2	865	-0.273814	0.0383955	107.1	92.9
Q92878-2	Isoform 2 of DNA repair protein RAD50 OS=Homo sapiens OX=9606 GN=RAD50	0	26	28	28	1318	-0.271426	0.0545145	105.6	94.4
Q8WW35	Tctex1 domain-containing protein 2 OS=Homo sapiens OX=9606 GN=TCTEX1D2 PE=1 SV=2	0.003	13	1	1	142	-0.271426	0.0463006	109.4	90.6
Q96AY3	Peptidyl-prolyl cis-trans isomerase FKBP10 OS=Homo sapiens OX=9606 GN=FKBP10 PE=1 SV=1	0	30	13	13	582	-0.27023	0.0545145	105.4	94.6
O75487	Glypican-4 OS=Homo sapiens OX=9606 GN=GPC4 PE=1 SV=4	0	30	11	10	556	-0.269033	0.0621437	108.2	91.8
O43909	Exostosin-like 3 OS=Homo sapiens OX=9606 GN=EXTL3 PE=1 SV=1	0	19	13	13	919	-0.269033	0.0545145	110.1	89.9
Q9Y277	Voltage-dependent anion-selective channel protein 3 OS=Homo sapiens OX=9606 GN=VDAC3 PE=1 SV=1	0	57	11	10	283	-0.267835	0.0545145	112.3	87.7
Q99941	Cyclic AMP-dependent transcription factor ATF-6 beta OS=Homo sapiens OX=9606 GN=ATF6B PE=1 SV=2	0	27	13	13	703	-0.267835	0.0550855	110.9	89.1
Q96NU0	Contactin-associated protein-like 3B OS=Homo sapiens OX=9606 GN=CNTNAP3B PE=2 SV=3	0	6	6	6	1288	-0.267835	0.052337	116.5	83.5
Q96EU6	Ribosomal RNA processing protein 36 homolog OS=Homo sapiens OX=9606 GN=RRP36 PE=1 SV=1	0	12	3	3	259	-0.267835	0.0476221	110.3	89.7
A8MTZ4	HCG96198, isoform CRA_d OS=Homo sapiens OX=9606 GN=TNRC18 PE=4 SV=2	0.006	16	1	1	130	-0.267835	0.0545145	109.3	90.7
Q6PCB5	Lysine-specific demethylase RSBN1L OS=Homo sapiens OX=9606 GN=RSBN1L PE=1 SV=2	0	22	14	14	846	-0.266637	0.0545145	113.4	86.6
P18084	Integrin beta-5 OS=Homo sapiens OX=9606 GN=ITGB5 PE=1 SV=1	0	18	9	9	799	-0.266637	0.0545145	107	93
Q9ULS5	Transmembrane and coiled-coil domain protein 3 OS=Homo sapiens OX=9606 GN=TMCC3 PE=1 SV=3	0	23	8	8	477	-0.265437	0.0539907	109.7	90.3
Q6P4F1-2	Isoform 2 of Alpha-(1,3)-fucosyltransferase 10 OS=Homo sapiens OX=9606 GN=FUT10	0	7	3	3	520	-0.265437	0.0442058	109.9	90.1
Q5VYS8	Terminal uridylyltransferase 7 OS=Homo sapiens OX=9606 GN=TUT7 PE=1 SV=1	0	11	11	11	1495	-0.265437	0.0545145	116.1	83.9
P15291	Beta-1,4-galactosyltransferase 1 OS=Homo sapiens OX=9606 GN=B4GALT1 PE=1 SV=5	0	7	2	2	398	-0.265437	0.0323539	106.9	93.1
E7ESP4	Integrin alpha-2 OS=Homo sapiens OX=9606 GN=ITGA2 PE=1 SV=1	0	15	10	10	942	-0.265437	0.0545145	109.6	90.4
Q6UVY6	DBH-like monooxygenase protein 1 OS=Homo sapiens OX=9606 GN=MOXD1 PE=1 SV=1	0	15	7	7	613	-0.264236	0.0545145	107.2	92.8
P28300	Protein-lysine 6-oxidase OS=Homo sapiens OX=9606 GN=LOX PE=1 SV=2	0	5	2	2	417	-0.264236	0.0347121	110.6	89.4
Q86Y91	Kinesin-like protein KIF18B OS=Homo sapiens OX=9606 GN=KIF18B PE=1 SV=4	0	7	5	5	852	-0.263034	0.0472743	105.3	94.7
E9PN30	Selenoprotein S (Fragment) OS=Homo sapiens OX=9606 GN=SELENOS PE=1 SV=1	0	11	2	2	218	-0.263034	0.0528581	109.7	90.3
A8K878	Mesencephalic astrocyte-derived neurotrophic factor OS=Homo sapiens OX=9606 GN=MANF PE=1 SV=1	0	37	6	6	185	-0.261832	0.0545145	107.7	92.3
Q9H4W6	Transcription factor COE3 OS=Homo sapiens OX=9606 GN=EBF3 PE=1 SV=2	0	6	3	3	596	-0.260628	0.052337	109.2	90.8
Q49A26	Putative oxidoreductase GLYR1 OS=Homo sapiens OX=9606 GN=GLYR1 PE=1 SV=4	0	9	4	4	553	-0.260628	0.0536632	108.2	91.8
O95568	Histidine protein methyltransferase 1 homolog OS=Homo sapiens OX=9606 GN=METTL18 PE=1 SV=1	0.001	5	1	1	372	-0.260628	0.0321813	109	91
Q9UDY2	Tight junction protein ZO-2 OS=Homo sapiens OX=9606 GN=TJP2 PE=1 SV=2	0	24	19	19	1190	-0.258217	0.0545145	111.7	88.3
Q9BXW7	Haloacid dehalogenase-like hydrolase domain-containing 5 OS=Homo sapiens OX=9606 GN=HDHD5 PE=1 SV=1	0.003	5	2	2	423	-0.258217	0.032823	118.4	81.6
Q9BX10	GTP-binding protein 2 OS=Homo sapiens OX=9606 GN=GTPBP2 PE=1 SV=1	0	17	8	8	602	-0.258217	0.052337	103	97
Q96JJ7	Protein disulfide-isomerase TMX3 OS=Homo sapiens OX=9606 GN=TMX3 PE=1 SV=2	0	26	11	11	454	-0.258217	0.0545145	110	90
Q96I25	Splicing factor 45 OS=Homo sapiens OX=9606 GN=RBM17 PE=1 SV=1	0	56	19	18	401	-0.257011	0.052337	109.1	90.9
Q6PJP8	DNA cross-link repair 1A protein OS=Homo sapiens OX=9606 GN=DCLRE1A PE=1 SV=3	0	6	4	4	1040	-0.257011	0.052337	125.1	74.9
Q8IV48	3'-5' exoribonuclease 1 OS=Homo sapiens OX=9606 GN=ERI1 PE=1 SV=3	0	11	3	3	349	-0.255803	0.0545145	107.9	92.1
P27348	14-3-3 protein theta OS=Homo sapiens OX=9606 GN=YWHAQ PE=1 SV=1	0	19	3	2	245	-0.255803	0.052337	109.9	90.1
P00761	Trypsin OS=Sus scrofa PE=1 SV=1	0	21	3	3	231	-0.255803	0.052337	107.8	92.2
Q9NUU6	Inactive ubiquitin thioesterase OTULINL OS=Homo sapiens OX=9606 GN=OTULINL PE=1 SV=1	0	5	2	2	356	-0.254594	0.0323539	108.8	91.2
Q8N2K0-2	Isoform 2 of Lysophosphatidylserine lipase ABHD12 OS=Homo sapiens OX=9606 GN=ABHD12	0	27	8	8	404	-0.254594	0.0545145	107.7	92.3
M0R0K9	Transcription intermediary factor 1-beta (Fragment) OS=Homo sapiens OX=9606 GN=TRIM28 PE=1 SV=1	0	53	13	1	460	-0.253384	0.0457104	103.3	96.7
B3KNS4	Endogenous retrovirus group K3 member 1 OS=Homo sapiens OX=9606 GN=ERVK3-1 PE=1 SV=1	0	50	3	3	109	-0.253384	0.0292754	82.9	117.1
Q99735	Microsomal glutathione S-transferase 2 OS=Homo sapiens OX=9606 GN=MGST2 PE=1 SV=1	0.001	10	1	1	147	-0.252173	0.0472743	108.7	91.3
Q95460	Major histocompatibility complex class I-related gene protein OS=Homo sapiens OX=9606 GN=MR1 PE=1 SV=1	0	17	3	3	341	-0.252173	0.0517523	102.2	97.8
A0A499FI48	Protein disulfide-isomerase OS=Homo sapiens OX=9606 GN=PDIA4 PE=1 SV=1	0	31	15	15	646	-0.252173	0.0511589	109.3	90.7
P33908	Mannosyl-oligosaccharide 1,2-alpha-mannosidase IA OS=Homo sapiens OX=9606 GN=MAN1A1 PE=1 SV=3	0	11	5	5	653	-0.250962	0.0495456	108.7	91.3
Q9NW13	RNA-binding protein 28 OS=Homo sapiens OX=9606 GN=RBM28 PE=1 SV=3	0	17	10	10	759	-0.249749	0.052337	110.6	89.4
Q5BJH7	Protein YIF1B OS=Homo sapiens OX=9606 GN=YIF1B PE=1 SV=1	0	17	3	3	314	-0.249749	0.0472743	109.2	90.8
Q16540	39S ribosomal protein L23, mitochondrial OS=Homo sapiens OX=9606 GN=MRPL23 PE=1 SV=1	0	42	4	4	153	-0.249749	0.0545145	105.7	94.3
Q9BWG6	Sodium channel modifier 1 OS=Homo sapiens OX=9606 GN=SCNM1 PE=1 SV=1	0.004	8	1	1	230	-0.248535	0.027673	113.9	86.1
O75071	EF-hand calcium-binding domain-containing protein 14 OS=Homo sapiens OX=9606 GN=EFCAB14 PE=1 SV=1	0	12	4	4	495	-0.248535	0.0442946	109.9	90.1
Q8IZA0	Dyslexia-associated protein KIAA0319-like protein OS=Homo sapiens OX=9606 GN=KIAA0319L PE=1 SV=2	0	7	5	5	1049	-0.24732	0.0492905	92.3	107.7
Q86XN6	Zinc finger protein 761 OS=Homo sapiens OX=9606 GN=ZNF761 PE=1 SV=3	0	5	4	2	746	-0.24732	0.0463451	109.2	90.8
Q5SU54	HLA class II histocompatibility antigen, DQ beta 1 chain OS=Homo sapiens OX=9606 GN=HLA-DQB1 PE=1 SV=1	0	26	6	6	269	-0.24732	0.0492233	98.2	101.8
Q05519	Serine/arginine-rich splicing factor 11 OS=Homo sapiens OX=9606 GN=SRSF11 PE=1 SV=1	0	19	8	8	484	-0.24732	0.0486671	115.1	84.9
P06213	Insulin receptor OS=Homo sapiens OX=9606 GN=INSR PE=1 SV=4	0	11	12	9	1382	-0.24732	0.052337	108.5	91.5
Q6UB99	Ankyrin repeat domain-containing protein 11 OS=Homo sapiens OX=9606 GN=ANKRD11 PE=1 SV=3	0	11	20	20	2663	-0.246104	0.0496435	105.5	94.5
P27797	Calreticulin OS=Homo sapiens OX=9606 GN=CALR PE=1 SV=1	0	48	10	10	417	-0.246104	0.0480043	109.4	90.6
P11021	Endoplasmic reticulum chaperone BiP OS=Homo sapiens OX=9606 GN=HSPA5 PE=1 SV=2	0	50	30	28	654	-0.246104	0.0480385	108.7	91.3
H7C0J3	Chromodomain-helicase-DNA-binding protein 3 (Fragment) OS=Homo sapiens OX=9606 GN=CHD3 PE=1 SV=1	0	37	7	2	383	-0.246104	0.0407228	111.4	88.6
Q9NV70	Exocyst complex component 1 OS=Homo sapiens OX=9606 GN=EXOC1 PE=1 SV=4	0	6	3	3	894	-0.244887	0.0321813	107.4	92.6
Q96DY7	Mdm2-binding protein OS=Homo sapiens OX=9606 GN=MTBP PE=1 SV=1	0	9	5	5	904	-0.244887	0.0463006	108.4	91.6
O43347	RNA-binding protein Musashi homolog 1 OS=Homo sapiens OX=9606 GN=MSI1 PE=1 SV=1	0	23	6	5	362	-0.244887	0.0517523	108.3	91.7
Q7Z2Z1	Treslin OS=Homo sapiens OX=9606 GN=TICRR PE=1 SV=2	0	13	18	18	1910	-0.243669	0.0545041	109.4	90.6
Q14684	Ribosomal RNA processing protein 1 homolog B OS=Homo sapiens OX=9606 GN=RRP1B PE=1 SV=3	0	36	17	17	758	-0.243669	0.0472743	107.1	92.9
P49959	Double-strand break repair protein MRE11 OS=Homo sapiens OX=9606 GN=MRE11 PE=1 SV=3	0	22	12	12	708	-0.243669	0.0545145	109	91
P05423	DNA-directed RNA polymerase III subunit RPC4 OS=Homo sapiens OX=9606 GN=POLR3D PE=1 SV=2	0	13	3	3	398	-0.243669	0.0472743	99.8	100.2
A0A087WVA1	Selenoprotein T OS=Homo sapiens OX=9606 GN=SELENOT PE=1 SV=1	0	26	4	4	195	-0.243669	0.052337	107	93
O75581	Low-density lipoprotein receptor-related protein 6 OS=Homo sapiens OX=9606 GN=LRP6 PE=1 SV=2	0	18	22	19	1613	-0.24245	0.0480043	104.7	95.3
Q86SF2	N-acetylgalactosaminyltransferase 7 OS=Homo sapiens OX=9606 GN=GALNT7 PE=1 SV=1	0	30	14	14	657	-0.24123	0.0486671	113.8	86.2
Q9H8K7	ATPase PAAT OS=Homo sapiens OX=9606 GN=PAAT PE=1 SV=2	0	13	4	4	445	-0.240009	0.0399793	111.1	88.9
Q15637-6	Isoform 6 of Splicing factor 1 OS=Homo sapiens OX=9606 GN=SF1	0	29	10	4	571	-0.240009	0.0534834	108.9	91.1
P11498	Pyruvate carboxylase, mitochondrial OS=Homo sapiens OX=9606 GN=PC PE=1 SV=2	0	54	40	40	1178	-0.240009	0.0463451	108.7	91.3
A0A0G2JIW1	Heat shock 70 kDa protein 1B OS=Homo sapiens OX=9606 GN=HSPA1B PE=1 SV=1	0	53	23	17	642	-0.240009	0.0463006	104.3	95.7
P18075	Bone morphogenetic protein 7 OS=Homo sapiens OX=9606 GN=BMP7 PE=1 SV=1	0	8	3	3	431	-0.238787	0.0486671	107.3	92.7
O95470	Sphingosine-1-phosphate lyase 1 OS=Homo sapiens OX=9606 GN=SGPL1 PE=1 SV=3	0	32	13	13	568	-0.238787	0.0457104	106.9	93.1
F8WAJ0	RNA helicase OS=Homo sapiens OX=9606 GN=DDX31 PE=1 SV=2	0	20	12	12	746	-0.238787	0.0484764	106.3	93.7
Q6YHK3	CD109 antigen OS=Homo sapiens OX=9606 GN=CD109 PE=1 SV=2	0	9	9	9	1445	-0.237564	0.0457104	107.3	92.7
O00566	U3 small nucleolar ribonucleoprotein protein MPP10 OS=Homo sapiens OX=9606 GN=MPHOSPH10 PE=1 SV=2	0	11	5	5	681	-0.237564	0.0486671	108.5	91.5
Q9H5H4	Zinc finger protein 768 OS=Homo sapiens OX=9606 GN=ZNF768 PE=1 SV=2	0	18	8	8	540	-0.23634	0.0472743	114.3	85.7
Q7Z7C8-2	Isoform 2 of Transcription initiation factor TFIID subunit 8 OS=Homo sapiens OX=9606 GN=TAF8	0	10	2	2	311	-0.23634	0.040204	106	94
A0A2U3TZE7	Cochlin OS=Homo sapiens OX=9606 GN=COCH PE=1 SV=1	0	12	7	7	615	-0.23634	0.0463451	107.4	92.6
A0A087X0I6	Non-specific serine/threonine protein kinase OS=Homo sapiens OX=9606 GN=MARK1 PE=1 SV=1	0	5	3	3	796	-0.23634	0.0457104	107.8	92.2
Q5C9Z4	Nucleolar MIF4G domain-containing protein 1 OS=Homo sapiens OX=9606 GN=NOM1 PE=1 SV=1	0	27	17	17	860	-0.235114	0.0452304	104.7	95.3
P52848	Bifunctional heparan sulfate N-deacetylase/N-sulfotransferase 1 OS=Homo sapiens OX=9606 GN=NDST1 PE=1 SV=1	0	6	4	4	882	-0.235114	0.0457104	105.6	94.4
G3XAI2	Laminin subunit beta-1 OS=Homo sapiens OX=9606 GN=LAMB1 PE=1 SV=1	0	39	41	26	1810	-0.235114	0.0452304	107.9	92.1
Q5JTH9	RRP12-like protein OS=Homo sapiens OX=9606 GN=RRP12 PE=1 SV=2	0	37	33	33	1297	-0.233888	0.0438867	107	93
Q14112	Nidogen-2 OS=Homo sapiens OX=9606 GN=NID2 PE=1 SV=3	0	11	11	10	1375	-0.233888	0.0383955	107.1	92.9
P10909-2	Isoform 2 of Clusterin OS=Homo sapiens OX=9606 GN=CLU	0	21	7	7	501	-0.233888	0.052337	107.7	92.3
Q9BVA0	Katanin p80 WD40 repeat-containing subunit B1 OS=Homo sapiens OX=9606 GN=KATNB1 PE=1 SV=1	0	15	7	7	655	-0.232661	0.0457104	110.7	89.3
Q96AE7-2	Isoform 2 of Tetratricopeptide repeat protein 17 OS=Homo sapiens OX=9606 GN=TTC17	0	25	18	2	956	-0.232661	0.0452304	109.1	90.9
Q562F6	Shugoshin 2 OS=Homo sapiens OX=9606 GN=SGO2 PE=1 SV=2	0	20	17	17	1265	-0.232661	0.0457104	109.7	90.3
A0A1B0GUD6	Protein Aster-B OS=Homo sapiens OX=9606 GN=GRAMD1B PE=1 SV=1	0	7	5	4	877	-0.232661	0.0347121	110.1	89.9
Q8IUC8	Polypeptide N-acetylgalactosaminyltransferase 13 OS=Homo sapiens OX=9606 GN=GALNT13 PE=2 SV=2	0	16	9	5	556	-0.231432	0.0472743	106.8	93.2
Q7Z6K5-2	Isoform C15orf38-AP3S2 of Arpin OS=Homo sapiens OX=9606 GN=ARPIN	0	5	2	2	394	-0.231432	0.0323539	104.2	95.8
O43427	Acidic fibroblast growth factor intracellular-binding protein OS=Homo sapiens OX=9606 GN=FIBP PE=1 SV=3	0	41	11	11	364	-0.231432	0.0517523	104.9	95.1
Q9Y5X1	Sorting nexin-9 OS=Homo sapiens OX=9606 GN=SNX9 PE=1 SV=1	0	25	10	10	595	-0.230203	0.0472743	105.1	94.9
Q9H0V9-2	Isoform 2 of VIP36-like protein OS=Homo sapiens OX=9606 GN=LMAN2L	0	37	11	11	359	-0.230203	0.0410038	103.7	96.3
Q8N4Q1-2	Isoform 2 of Mitochondrial intermembrane space import and assembly protein 40 OS=Homo sapiens OX=9606 GN=CHCHD4	0	23	2	2	155	-0.230203	0.0290889	106.5	93.5
Q71F23	Centromere protein U OS=Homo sapiens OX=9606 GN=CENPU PE=1 SV=1	0	29	8	8	418	-0.230203	0.0457104	105.4	94.6
O95831	Apoptosis-inducing factor 1, mitochondrial OS=Homo sapiens OX=9606 GN=AIFM1 PE=1 SV=1	0	15	7	7	613	-0.230203	0.0463451	108.2	91.8
A0A1B0GTL5	Rab11 family-interacting protein 5 OS=Homo sapiens OX=9606 GN=RAB11FIP5 PE=1 SV=1	0	18	14	14	1324	-0.230203	0.0393709	104.8	95.2
P49711	Transcriptional repressor CTCF OS=Homo sapiens OX=9606 GN=CTCF PE=1 SV=1	0	6	3	3	727	-0.228973	0.0321813	105.4	94.6
Q8NBJ4	Golgi membrane protein 1 OS=Homo sapiens OX=9606 GN=GOLM1 PE=1 SV=1	0	31	10	10	401	-0.227741	0.0389748	108.2	91.8
Q6L9W6	Beta-1,4-N-acetylgalactosaminyltransferase 3 OS=Homo sapiens OX=9606 GN=B4GALNT3 PE=1 SV=2	0	8	6	6	998	-0.227741	0.0382669	100.9	99.1
A0A087WXF8	Nucleolar protein of 40 kDa OS=Homo sapiens OX=9606 GN=ZCCHC17 PE=1 SV=1	0	21	4	4	263	-0.227741	0.0517523	108	92
Q9UHI8	A disintegrin and metalloproteinase with thrombospondin motifs 1 OS=Homo sapiens OX=9606 GN=ADAMTS1 PE=1 SV=4	0	25	13	13	967	-0.226509	0.0486671	110.9	89.1
O76031	ATP-dependent Clp protease ATP-binding subunit clpX-like, mitochondrial OS=Homo sapiens OX=9606 GN=CLPX PE=1 SV=2	0	22	10	10	633	-0.225275	0.0457104	107.8	92.2
Q9H5Z1	Probable ATP-dependent RNA helicase DHX35 OS=Homo sapiens OX=9606 GN=DHX35 PE=1 SV=2	0	38	22	22	703	-0.22404	0.0372179	106.2	93.8
Q8TEW0	Partitioning defective 3 homolog OS=Homo sapiens OX=9606 GN=PARD3 PE=1 SV=2	0	19	19	19	1356	-0.22404	0.0398285	101.9	98.1
Q14588	Zinc finger protein 234 OS=Homo sapiens OX=9606 GN=ZNF234 PE=2 SV=3	0	8	4	4	700	-0.22404	0.0323539	105.7	94.3
P51948	CDK-activating kinase assembly factor MAT1 OS=Homo sapiens OX=9606 GN=MNAT1 PE=1 SV=1	0	21	4	4	309	-0.22404	0.0416052	106.8	93.2
Q9NUM4	Transmembrane protein 106B OS=Homo sapiens OX=9606 GN=TMEM106B PE=1 SV=2	0	11	2	2	274	-0.222805	0.0331959	106.9	93.1
Q8TAA9	Vang-like protein 1 OS=Homo sapiens OX=9606 GN=VANGL1 PE=1 SV=1	0	36	14	14	524	-0.221568	0.0347121	104.1	95.9
Q9UHB7	AF4/FMR2 family member 4 OS=Homo sapiens OX=9606 GN=AFF4 PE=1 SV=1	0	19	18	18	1163	-0.22033	0.0347121	101.9	98.1
Q96CB9	5-methylcytosine rRNA methyltransferase NSUN4 OS=Homo sapiens OX=9606 GN=NSUN4 PE=1 SV=2	0	16	3	3	384	-0.22033	0.0309062	106.5	93.5
Q8IYU8	Calcium uptake protein 2, mitochondrial OS=Homo sapiens OX=9606 GN=MICU2 PE=1 SV=2	0	40	13	13	434	-0.22033	0.0347121	108.2	91.8
P78345	Ribonuclease P protein subunit p38 OS=Homo sapiens OX=9606 GN=RPP38 PE=1 SV=2	0	24	6	6	283	-0.22033	0.0411183	106.6	93.4
P32780	General transcription factor IIH subunit 1 OS=Homo sapiens OX=9606 GN=GTF2H1 PE=1 SV=1	0	26	9	9	548	-0.22033	0.0323539	104.3	95.7
O43529	Carbohydrate sulfotransferase 10 OS=Homo sapiens OX=9606 GN=CHST10 PE=1 SV=1	0	10	3	3	356	-0.22033	0.0383955	108.3	91.7
A0A2R8YEC9	Beta-mannosidase OS=Homo sapiens OX=9606 GN=MANBA PE=1 SV=1	0	16	12	12	925	-0.22033	0.0463451	110.3	89.7
Q7L311	Armadillo repeat-containing X-linked protein 2 OS=Homo sapiens OX=9606 GN=ARMCX2 PE=2 SV=1	0	5	2	2	632	-0.219091	0.0273183	107.6	92.4
Q96G21	U3 small nucleolar ribonucleoprotein protein IMP4 OS=Homo sapiens OX=9606 GN=IMP4 PE=1 SV=1	0	11	3	3	291	-0.217851	0.0321813	109.5	90.5
Q5VUD6	Divergent protein kinase domain 1B OS=Homo sapiens OX=9606 GN=DIPK1B PE=1 SV=3	0	11	4	3	431	-0.217851	0.0347121	105.7	94.3
Q14571	Inositol 1,4,5-trisphosphate receptor type 2 OS=Homo sapiens OX=9606 GN=ITPR2 PE=1 SV=2	0	31	62	53	2701	-0.217851	0.0331959	102.9	97.1
O15027-5	Isoform 5 of Protein transport protein Sec16A OS=Homo sapiens OX=9606 GN=SEC16A	0	15	22	22	2379	-0.217851	0.045604	106	94
P78371	T-complex protein 1 subunit beta OS=Homo sapiens OX=9606 GN=CCT2 PE=1 SV=4	0	35	12	12	535	-0.21661	0.04319	107.9	92.1
Q9NVH1	DnaJ homolog subfamily C member 11 OS=Homo sapiens OX=9606 GN=DNAJC11 PE=1 SV=2	0	23	8	8	559	-0.215368	0.0363048	110	90
Q9UHK0	Nuclear fragile X mental retardation-interacting protein 1 OS=Homo sapiens OX=9606 GN=NUFIP1 PE=1 SV=2	0	36	12	12	495	-0.214125	0.0450381	111.2	88.8
Q9NS56	E3 ubiquitin-protein ligase Topors OS=Homo sapiens OX=9606 GN=TOPORS PE=1 SV=1	0	8	7	7	1045	-0.212881	0.032823	110.2	89.8
Q9BX67	Junctional adhesion molecule C OS=Homo sapiens OX=9606 GN=JAM3 PE=1 SV=1	0.004	5	1	1	310	-0.212881	0.0273183	115.4	84.6
Q14692	Ribosome biogenesis protein BMS1 homolog OS=Homo sapiens OX=9606 GN=BMS1 PE=1 SV=1	0	23	19	19	1282	-0.212881	0.033944	107.7	92.3
O00411	DNA-directed RNA polymerase, mitochondrial OS=Homo sapiens OX=9606 GN=POLRMT PE=1 SV=2	0	42	32	32	1230	-0.212881	0.0323539	109	91
Q9Y6M9	NADH dehydrogenase [ubiquinone] 1 beta subcomplex subunit 9 OS=Homo sapiens OX=9606 GN=NDUFB9 PE=1 SV=3	0	44	6	6	179	-0.211635	0.032823	105.6	94.4
Q99519	Sialidase-1 OS=Homo sapiens OX=9606 GN=NEU1 PE=1 SV=1	0	7	3	3	415	-0.211635	0.0321813	106.9	93.1
Q15361	Transcription termination factor 1 OS=Homo sapiens OX=9606 GN=TTF1 PE=1 SV=3	0	9	5	5	905	-0.211635	0.0323539	105.5	94.5
P52849	Bifunctional heparan sulfate N-deacetylase/N-sulfotransferase 2 OS=Homo sapiens OX=9606 GN=NDST2 PE=1 SV=1	0	12	9	9	883	-0.210389	0.0302496	106.4	93.6
J3KPP4	Cisplatin resistance-associated overexpressed protein, isoform CRA_b OS=Homo sapiens OX=9606 GN=LUC7L3 PE=1 SV=1	0	22	7	7	489	-0.210389	0.0321813	109	91
Q9BRX9	WD repeat domain-containing protein 83 OS=Homo sapiens OX=9606 GN=WDR83 PE=1 SV=1	0	40	9	9	315	-0.209141	0.0321813	106.1	93.9
Q9BRR8	G patch domain-containing protein 1 OS=Homo sapiens OX=9606 GN=GPATCH1 PE=1 SV=1	0	42	29	29	931	-0.209141	0.0321813	104.2	95.8
Q99653	Calcineurin B homologous protein 1 OS=Homo sapiens OX=9606 GN=CHP1 PE=1 SV=3	0	18	3	3	195	-0.209141	0.0323095	109	91
P18065	Insulin-like growth factor-binding protein 2 OS=Homo sapiens OX=9606 GN=IGFBP2 PE=1 SV=2	0	25	6	6	325	-0.209141	0.0324259	110.1	89.9
Q9UM22	Mammalian ependymin-related protein 1 OS=Homo sapiens OX=9606 GN=EPDR1 PE=1 SV=2	0	18	3	3	224	-0.207893	0.0321813	115.2	84.8
Q14573	Inositol 1,4,5-trisphosphate receptor type 3 OS=Homo sapiens OX=9606 GN=ITPR3 PE=1 SV=2	0	37	67	61	2671	-0.207893	0.0321813	107.9	92.1
O15460	Prolyl 4-hydroxylase subunit alpha-2 OS=Homo sapiens OX=9606 GN=P4HA2 PE=1 SV=1	0	28	12	12	535	-0.207893	0.0411183	105.1	94.9
Q9UGU5	HMG domain-containing protein 4 OS=Homo sapiens OX=9606 GN=HMGXB4 PE=1 SV=2	0	26	8	8	601	-0.206643	0.032823	106.1	93.9
Q9NQZ2	Something about silencing protein 10 OS=Homo sapiens OX=9606 GN=UTP3 PE=1 SV=1	0	16	4	4	479	-0.206643	0.0292754	112.8	87.2
Q5VYV7	Protein SLX4IP OS=Homo sapiens OX=9606 GN=SLX4IP PE=1 SV=1	0	15	5	5	408	-0.206643	0.0321813	105	95
F5H1S1	Mannosyltransferase OS=Homo sapiens OX=9606 GN=PIGB PE=1 SV=2	0	18	7	7	555	-0.206643	0.0321813	108	92
Q9UQ84	Exonuclease 1 OS=Homo sapiens OX=9606 GN=EXO1 PE=1 SV=2	0	18	10	10	846	-0.205393	0.0347121	105.2	94.8
Q9UFG5-2	Isoform 2 of UPF0449 protein C19orf25 OS=Homo sapiens OX=9606 GN=C19orf25	0.001	26	2	2	161	-0.205393	0.0273183	107.9	92.1
Q9UBP9	PTB domain-containing engulfment adapter protein 1 OS=Homo sapiens OX=9606 GN=GULP1 PE=1 SV=1	0	29	6	6	304	-0.205393	0.0325077	110.1	89.9
Q9H2G4	Testis-specific Y-encoded-like protein 2 OS=Homo sapiens OX=9606 GN=TSPYL2 PE=1 SV=1	0	13	7	7	693	-0.205393	0.0323539	105.2	94.8
Q8N5Y2	Male-specific lethal 3 homolog OS=Homo sapiens OX=9606 GN=MSL3 PE=1 SV=1	0	9	4	4	521	-0.205393	0.0323539	102.1	97.9
P08581-2	Isoform 2 of Hepatocyte growth factor receptor OS=Homo sapiens OX=9606 GN=MET	0	13	14	14	1408	-0.205393	0.0321813	104.1	95.9
O43663	Protein regulator of cytokinesis 1 OS=Homo sapiens OX=9606 GN=PRC1 PE=1 SV=2	0	37	18	2	620	-0.205393	0.0321813	105.5	94.5
X6R4W8	BUB3-interacting and GLEBS motif-containing protein ZNF207 OS=Homo sapiens OX=9606 GN=ZNF207 PE=1 SV=1	0	13	5	5	497	-0.204141	0.0321813	64.4	135.6
Q9UJV9	Probable ATP-dependent RNA helicase DDX41 OS=Homo sapiens OX=9606 GN=DDX41 PE=1 SV=2	0	55	29	29	622	-0.204141	0.0321813	106.1	93.9
Q9P2K2	Thioredoxin domain-containing protein 16 OS=Homo sapiens OX=9606 GN=TXNDC16 PE=1 SV=4	0	22	15	15	825	-0.204141	0.0321813	106	94
Q99832	T-complex protein 1 subunit eta OS=Homo sapiens OX=9606 GN=CCT7 PE=1 SV=2	0	26	12	12	543	-0.204141	0.0347121	106.4	93.6
Q7Z333-4	Isoform 4 of Probable helicase senataxin OS=Homo sapiens OX=9606 GN=SETX	0	21	42	42	2706	-0.204141	0.0321813	106.2	93.8
Q14554	Protein disulfide-isomerase A5 OS=Homo sapiens OX=9606 GN=PDIA5 PE=1 SV=1	0	19	8	8	519	-0.204141	0.0321813	113.5	86.5
P17029	Zinc finger protein with KRAB and SCAN domains 1 OS=Homo sapiens OX=9606 GN=ZKSCAN1 PE=1 SV=3	0	16	6	6	563	-0.204141	0.0323539	110.2	89.8
P08236	Beta-glucuronidase OS=Homo sapiens OX=9606 GN=GUSB PE=1 SV=2	0	27	14	14	651	-0.204141	0.0321813	107.4	92.6
P02751-1	Isoform 1 of Fibronectin OS=Homo sapiens OX=9606 GN=FN1	0	10	15	15	2386	-0.204141	0.0338608	104.8	95.2
Q5T3I0-3	Isoform 3 of G patch domain-containing protein 4 OS=Homo sapiens OX=9606 GN=GPATCH4	0	24	9	9	451	-0.202888	0.0323539	112.8	87.2
Q5BKT4	Dol-P-Glc:Glc(2)Man(9)GlcNAc(2)-PP-Dol alpha-1,2-glucosyltransferase OS=Homo sapiens OX=9606 GN=ALG10 PE=2 SV=1	0	5	2	2	473	-0.202888	0.027673	109	91
Q56NI9	N-acetyltransferase ESCO2 OS=Homo sapiens OX=9606 GN=ESCO2 PE=1 SV=1	0	21	8	8	601	-0.202888	0.0302496	106.6	93.4
Q10469	Alpha-1,6-mannosyl-glycoprotein 2-beta-N-acetylglucosaminyltransferase OS=Homo sapiens OX=9606 GN=MGAT2 PE=1 SV=1	0	13	5	5	447	-0.202888	0.0321813	105.1	94.9
O75072	Fukutin OS=Homo sapiens OX=9606 GN=FKTN PE=1 SV=2	0	7	3	3	461	-0.202888	0.0321813	109.1	90.9
O75044	SLIT-ROBO Rho GTPase-activating protein 2 OS=Homo sapiens OX=9606 GN=SRGAP2 PE=1 SV=3	0	23	17	16	1071	-0.202888	0.0321813	108.2	91.8
O60613	Selenoprotein F OS=Homo sapiens OX=9606 GN=SELENOF PE=1 SV=4	0	23	3	3	165	-0.202888	0.0317297	108	92
A0A0B4J1V8	HCG2039996 OS=Homo sapiens OX=9606 GN=PPAN-P2RY11 PE=3 SV=1	0	15	8	8	794	-0.202888	0.0323539	107.4	92.6
Q9BT22	Chitobiosyldiphosphodolichol beta-mannosyltransferase OS=Homo sapiens OX=9606 GN=ALG1 PE=1 SV=2	0	8	2	2	464	-0.201634	0.0273183	111.5	88.5
Q13308-6	Isoform 6 of Inactive tyrosine-protein kinase 7 OS=Homo sapiens OX=9606 GN=PTK7	0	21	16	16	1078	-0.201634	0.0321813	105	95
P55899	IgG receptor FcRn large subunit p51 OS=Homo sapiens OX=9606 GN=FCGRT PE=1 SV=1	0	8	2	2	365	-0.201634	0.0273183	104.6	95.4
O15031	Plexin-B2 OS=Homo sapiens OX=9606 GN=PLXNB2 PE=1 SV=3	0	23	30	30	1838	-0.201634	0.0302496	107.5	92.5
Q9P265	Disco-interacting protein 2 homolog B OS=Homo sapiens OX=9606 GN=DIP2B PE=1 SV=3	0	13	14	12	1576	-0.200379	0.0323539	106.9	93.1
Q9NV31	U3 small nucleolar ribonucleoprotein protein IMP3 OS=Homo sapiens OX=9606 GN=IMP3 PE=1 SV=1	0	29	4	4	184	-0.200379	0.0321813	109.7	90.3
Q9H9S5	Fukutin-related protein OS=Homo sapiens OX=9606 GN=FKRP PE=1 SV=1	0	8	4	4	495	-0.200379	0.0301574	108.9	91.1
Q92667	A-kinase anchor protein 1, mitochondrial OS=Homo sapiens OX=9606 GN=AKAP1 PE=1 SV=1	0	13	8	8	903	-0.200379	0.0323539	107.3	92.7
P20933	N(4)-(beta-N-acetylglucosaminyl)-L-asparaginase OS=Homo sapiens OX=9606 GN=AGA PE=1 SV=2	0	10	2	2	346	-0.200379	0.0273183	106.9	93.1
Q7Z7L1	Schlafen family member 11 OS=Homo sapiens OX=9606 GN=SLFN11 PE=1 SV=2	0	11	8	8	901	-0.199123	0.0321813	110.1	89.9
Q10472	Polypeptide N-acetylgalactosaminyltransferase 1 OS=Homo sapiens OX=9606 GN=GALNT1 PE=1 SV=1	0	16	8	4	559	-0.199123	0.0292754	101.1	98.9
P05556	Integrin beta-1 OS=Homo sapiens OX=9606 GN=ITGB1 PE=1 SV=2	0	25	14	14	798	-0.199123	0.0296628	106.8	93.2
P05023	Sodium/potassium-transporting ATPase subunit alpha-1 OS=Homo sapiens OX=9606 GN=ATP1A1 PE=1 SV=1	0	21	15	15	1023	-0.199123	0.0323539	106.6	93.4
Q9Y5Z0	Beta-secretase 2 OS=Homo sapiens OX=9606 GN=BACE2 PE=1 SV=1	0	7	3	3	518	-0.197865	0.0292754	104.1	95.9
Q9UHX1-2	Isoform 2 of Poly(U)-binding-splicing factor PUF60 OS=Homo sapiens OX=9606 GN=PUF60	0	54	21	2	542	-0.197865	0.0296628	108.6	91.4
Q96MW7	Tigger transposable element-derived protein 1 OS=Homo sapiens OX=9606 GN=TIGD1 PE=1 SV=1	0	17	6	6	591	-0.197865	0.0298009	106.4	93.6
Q6P087	Mitochondrial mRNA pseudouridine synthase RPUSD3 OS=Homo sapiens OX=9606 GN=RPUSD3 PE=1 SV=3	0	42	11	11	351	-0.197865	0.0381357	106	94
Q5VT25-6	Isoform 6 of Serine/threonine-protein kinase MRCK alpha OS=Homo sapiens OX=9606 GN=CDC42BPA	0	17	23	20	1781	-0.197865	0.032823	106.1	93.9
A0A087WXK8	Chromosome 20 open reading frame 129 OS=Homo sapiens OX=9606 GN=FAM83D PE=1 SV=1	0	18	9	9	615	-0.197865	0.0321813	110	90
Q14498-2	Isoform 2 of RNA-binding protein 39 OS=Homo sapiens OX=9606 GN=RBM39	0	55	20	18	524	-0.196607	0.0292754	105.4	94.6
P54274	Telomeric repeat-binding factor 1 OS=Homo sapiens OX=9606 GN=TERF1 PE=1 SV=3	0	9	4	4	439	-0.196607	0.027673	130.2	69.8
O94876	Transmembrane and coiled-coil domains protein 1 OS=Homo sapiens OX=9606 GN=TMCC1 PE=1 SV=3	0	17	6	5	653	-0.196607	0.027673	95.1	104.9
E3W994	CLIP-associating protein 2 OS=Homo sapiens OX=9606 GN=CLASP2 PE=1 SV=2	0	23	20	16	1273	-0.196607	0.0321813	113.2	86.8
Q9NY93	Probable ATP-dependent RNA helicase DDX56 OS=Homo sapiens OX=9606 GN=DDX56 PE=1 SV=1	0	50	19	19	547	-0.195348	0.0292754	98.6	101.4
Q9H8V3	Protein ECT2 OS=Homo sapiens OX=9606 GN=ECT2 PE=1 SV=4	0	12	8	8	914	-0.195348	0.0321813	109.6	90.4
Q5VZY9	Serine/threonine-protein kinase DCLK1 OS=Homo sapiens OX=9606 GN=DCLK1 PE=1 SV=1	0	24	7	7	363	-0.195348	0.0273183	106.4	93.6
Q5VV42	Threonylcarbamoyladenosine tRNA methylthiotransferase OS=Homo sapiens OX=9606 GN=CDKAL1 PE=1 SV=1	0	16	7	7	579	-0.195348	0.0321813	107.1	92.9
O95402	Mediator of RNA polymerase II transcription subunit 26 OS=Homo sapiens OX=9606 GN=MED26 PE=1 SV=2	0	28	11	11	600	-0.195348	0.0321813	106.4	93.6
A0A0D9SEY1	Mitogen-activated protein kinase kinase kinase kinase 4 OS=Homo sapiens OX=9606 GN=MAP4K4 PE=1 SV=1	0	18	17	11	1320	-0.194087	0.0321813	110.1	89.9
Q9Y6V7	Probable ATP-dependent RNA helicase DDX49 OS=Homo sapiens OX=9606 GN=DDX49 PE=1 SV=1	0	23	8	8	483	-0.192825	0.0321813	168.9	31.1
Q5QPI9	Ectonucleoside triphosphate diphosphohydrolase 6 OS=Homo sapiens OX=9606 GN=ENTPD6 PE=1 SV=2	0	27	7	4	437	-0.192825	0.0321813	108.3	91.7
Q06481	Amyloid-like protein 2 OS=Homo sapiens OX=9606 GN=APLP2 PE=1 SV=2	0	22	11	2	763	-0.192825	0.0321813	101.3	98.7
A0A0J9YXF2	Paraoxonase 2, isoform CRA_a OS=Homo sapiens OX=9606 GN=PON2 PE=1 SV=1	0	13	2	2	375	-0.192825	0.0273183	111.5	88.5
Q9UL15-2	Isoform 2 of BAG family molecular chaperone regulator 5 OS=Homo sapiens OX=9606 GN=BAG5	0	8	3	3	488	-0.191563	0.0292754	108.1	91.9
Q9P273	Teneurin-3 OS=Homo sapiens OX=9606 GN=TENM3 PE=2 SV=3	0	11	21	21	2699	-0.191563	0.0307229	110	90
Q9NUQ2	1-acyl-sn-glycerol-3-phosphate acyltransferase epsilon OS=Homo sapiens OX=9606 GN=AGPAT5 PE=1 SV=3	0	18	5	5	364	-0.191563	0.0321813	107.2	92.8
Q9NQC3	Reticulon-4 OS=Homo sapiens OX=9606 GN=RTN4 PE=1 SV=2	0	6	4	4	1192	-0.191563	0.0321813	109.2	90.8
Q99538	Legumain OS=Homo sapiens OX=9606 GN=LGMN PE=1 SV=1	0	17	4	4	433	-0.191563	0.0318684	108.1	91.9
Q92945	Far upstream element-binding protein 2 OS=Homo sapiens OX=9606 GN=KHSRP PE=1 SV=4	0	45	21	20	711	-0.191563	0.0278303	105.8	94.2
Q96DH6	RNA-binding protein Musashi homolog 2 OS=Homo sapiens OX=9606 GN=MSI2 PE=1 SV=1	0	20	5	4	328	-0.190299	0.0292754	106.3	93.7
P82912	28S ribosomal protein S11, mitochondrial OS=Homo sapiens OX=9606 GN=MRPS11 PE=1 SV=2	0	9	2	2	194	-0.190299	0.0273183	97.2	102.8
Q9ULG6-5	Isoform 5 of Cell cycle progression protein 1 OS=Homo sapiens OX=9606 GN=CCPG1	0	14	9	1	807	-0.189034	0.027673	104	96
Q9UIQ6	Leucyl-cystinyl aminopeptidase OS=Homo sapiens OX=9606 GN=LNPEP PE=1 SV=3	0	20	17	17	1025	-0.189034	0.0292754	104.7	95.3
Q9UHF1	Epidermal growth factor-like protein 7 OS=Homo sapiens OX=9606 GN=EGFL7 PE=1 SV=3	0	24	4	4	273	-0.189034	0.0273183	104.9	95.1
Q969X5	Endoplasmic reticulum-Golgi intermediate compartment protein 1 OS=Homo sapiens OX=9606 GN=ERGIC1 PE=1 SV=1	0	17	5	5	290	-0.189034	0.0277561	103.4	96.6
Q8IWU5	Extracellular sulfatase Sulf-2 OS=Homo sapiens OX=9606 GN=SULF2 PE=1 SV=1	0	12	6	6	870	-0.189034	0.0297082	106.6	93.4
Q15836	Vesicle-associated membrane protein 3 OS=Homo sapiens OX=9606 GN=VAMP3 PE=1 SV=3	0	33	2	2	100	-0.189034	0.0273183	106.8	93.2
A0A3B3ITU8	Inositol 1,4,5-trisphosphate receptor type 1 OS=Homo sapiens OX=9606 GN=ITPR1 PE=1 SV=1	0	22	46	37	2744	-0.189034	0.027673	105.6	94.4
Q86WX3	Active regulator of SIRT1 OS=Homo sapiens OX=9606 GN=RPS19BP1 PE=1 SV=1	0	28	3	3	136	-0.187768	0.027745	105.7	94.3
Q5SW79	Centrosomal protein of 170 kDa OS=Homo sapiens OX=9606 GN=CEP170 PE=1 SV=1	0	28	33	32	1584	-0.187768	0.027673	102	98
Q15545	Transcription initiation factor TFIID subunit 7 OS=Homo sapiens OX=9606 GN=TAF7 PE=1 SV=1	0	26	6	6	349	-0.187768	0.0299607	105	95
P11047	Laminin subunit gamma-1 OS=Homo sapiens OX=9606 GN=LAMC1 PE=1 SV=3	0	37	43	43	1609	-0.187768	0.027673	104.9	95.1
Q9NZ43	Vesicle transport protein USE1 OS=Homo sapiens OX=9606 GN=USE1 PE=1 SV=2	0	10	2	2	259	-0.186501	0.0273183	109.3	90.7
Q68DK7	Male-specific lethal 1 homolog OS=Homo sapiens OX=9606 GN=MSL1 PE=1 SV=3	0	20	6	6	614	-0.185232	0.0292754	102.9	97.1
I3L504	Eukaryotic translation initiation factor 5A-1 OS=Homo sapiens OX=9606 GN=EIF5A PE=1 SV=1	0	22	2	2	186	-0.185232	0.0273183	106.2	93.8
Q9UBC1	NF-kappa-B inhibitor-like protein 1 OS=Homo sapiens OX=9606 GN=NFKBIL1 PE=1 SV=1	0	33	8	8	381	-0.183963	0.0295687	108.1	91.9
Q9GZR1	Sentrin-specific protease 6 OS=Homo sapiens OX=9606 GN=SENP6 PE=1 SV=2	0	6	4	4	1112	-0.183963	0.027673	109.6	90.4
Q8IWC1	MAP7 domain-containing protein 3 OS=Homo sapiens OX=9606 GN=MAP7D3 PE=1 SV=2	0	25	17	17	876	-0.183963	0.027745	104.7	95.3
Q5TDF0	Cancer-related nucleoside-triphosphatase OS=Homo sapiens OX=9606 GN=NTPCR PE=1 SV=1	0	34	6	6	228	-0.183963	0.0311764	107.7	92.3
Q15084-2	Isoform 2 of Protein disulfide-isomerase A6 OS=Homo sapiens OX=9606 GN=PDIA6	0	29	12	12	492	-0.183963	0.0273183	105.3	94.7
O95490-6	Isoform 6 of Adhesion G protein-coupled receptor L2 OS=Homo sapiens OX=9606 GN=ADGRL2	0	17	17	17	1474	-0.183963	0.027673	104.6	95.4
Q9NYQ6	Cadherin EGF LAG seven-pass G-type receptor 1 OS=Homo sapiens OX=9606 GN=CELSR1 PE=1 SV=1	0	5	10	9	3014	-0.182692	0.027745	107.3	92.7
Q9H0L4	Cleavage stimulation factor subunit 2 tau variant OS=Homo sapiens OX=9606 GN=CSTF2T PE=1 SV=1	0	22	8	3	616	-0.182692	0.0273183	104.2	95.8
Q9BYG3	MKI67 FHA domain-interacting nucleolar phosphoprotein OS=Homo sapiens OX=9606 GN=NIFK PE=1 SV=1	0	28	5	5	293	-0.182692	0.0283476	104	96
Q8WUQ7-2	Isoform 2 of Cactin OS=Homo sapiens OX=9606 GN=CACTIN	0	25	17	17	935	-0.182692	0.0273183	103.3	96.7
Q8TDR2	Serine/threonine-protein kinase 35 OS=Homo sapiens OX=9606 GN=STK35 PE=1 SV=2	0	9	3	3	534	-0.182692	0.0273183	100.8	99.2
P50991	T-complex protein 1 subunit delta OS=Homo sapiens OX=9606 GN=CCT4 PE=1 SV=4	0	35	13	12	539	-0.182692	0.0297082	107	93
E7EX59	Propionyl-CoA carboxylase beta chain, mitochondrial OS=Homo sapiens OX=9606 GN=PCCB PE=1 SV=1	0	51	21	21	570	-0.182692	0.0273183	100.6	99.4
Q9UK58	Cyclin-L1 OS=Homo sapiens OX=9606 GN=CCNL1 PE=1 SV=1	0	19	8	7	526	-0.181421	0.0321813	111.6	88.4
Q9UHR5	SAP30-binding protein OS=Homo sapiens OX=9606 GN=SAP30BP PE=1 SV=1	0	42	8	8	308	-0.181421	0.0273183	107	93
Q9NVU0	DNA-directed RNA polymerase III subunit RPC5 OS=Homo sapiens OX=9606 GN=POLR3E PE=1 SV=1	0	6	3	3	708	-0.181421	0.0273183	104.9	95.1
Q53EP0	Fibronectin type III domain-containing protein 3B OS=Homo sapiens OX=9606 GN=FNDC3B PE=1 SV=2	0	15	13	13	1204	-0.181421	0.0290889	102.7	97.3
Q13443	Disintegrin and metalloproteinase domain-containing protein 9 OS=Homo sapiens OX=9606 GN=ADAM9 PE=1 SV=1	0	10	7	7	819	-0.181421	0.0279032	103.3	96.7
P22830-2	Isoform 2 of Ferrochelatase, mitochondrial OS=Homo sapiens OX=9606 GN=FECH	0	18	6	6	429	-0.181421	0.027673	115.4	84.6
H0Y6T6	Nurim (Fragment) OS=Homo sapiens OX=9606 GN=NRM PE=1 SV=1	0	6	2	2	262	-0.181421	0.0292754	106.8	93.2
A0A2R8YG02	DNA mismatch repair protein OS=Homo sapiens OX=9606 GN=MSH2 PE=1 SV=1	0	8	6	6	938	-0.181421	0.027673	104.9	95.1
Q9GZX9	Twisted gastrulation protein homolog 1 OS=Homo sapiens OX=9606 GN=TWSG1 PE=1 SV=1	0	7	1	1	223	-0.180148	0.0273183	106.2	93.8
Q9BRZ2	E3 ubiquitin-protein ligase TRIM56 OS=Homo sapiens OX=9606 GN=TRIM56 PE=1 SV=3	0	18	9	9	755	-0.180148	0.027745	114.9	85.1
Q8TEK3-1	Isoform 2 of Histone-lysine N-methyltransferase, H3 lysine-79 specific OS=Homo sapiens OX=9606 GN=DOT1L	0	6	7	7	1739	-0.180148	0.0273183	109.2	90.8
Q5VW26	Nuclear factor 1 OS=Homo sapiens OX=9606 GN=NFIB PE=1 SV=1	0	6	3	1	570	-0.180148	0.0273183	104.9	95.1
O75078	Disintegrin and metalloproteinase domain-containing protein 11 OS=Homo sapiens OX=9606 GN=ADAM11 PE=2 SV=3	0	5	2	2	769	-0.180148	0.0273183	98.6	101.4
P54802	Alpha-N-acetylglucosaminidase OS=Homo sapiens OX=9606 GN=NAGLU PE=1 SV=2	0	38	19	18	743	-0.178874	0.0273183	105.6	94.4
O94761	ATP-dependent DNA helicase Q4 OS=Homo sapiens OX=9606 GN=RECQL4 PE=1 SV=2	0	7	5	5	1208	-0.178874	0.0273183	116	84
Q9GZR7	ATP-dependent RNA helicase DDX24 OS=Homo sapiens OX=9606 GN=DDX24 PE=1 SV=1	0	28	18	18	859	-0.177599	0.0273183	103.4	96.6
Q15011	Homocysteine-responsive endoplasmic reticulum-resident ubiquitin-like domain member 1 protein OS=Homo sapiens OX=9606 GN=HERPUD1 PE=1 SV=1	0	6	2	2	391	-0.177599	0.0273183	105.9	94.1
P49641	Alpha-mannosidase 2x OS=Homo sapiens OX=9606 GN=MAN2A2 PE=2 SV=3	0	11	11	10	1150	-0.177599	0.027745	106.5	93.5
P31323	cAMP-dependent protein kinase type II-beta regulatory subunit OS=Homo sapiens OX=9606 GN=PRKAR2B PE=1 SV=3	0	20	5	3	418	-0.177599	0.0273183	106.6	93.4
P0DP91	Chimeric ERCC6-PGBD3 protein OS=Homo sapiens OX=9606 GN=ERCC6 PE=1 SV=1	0	14	10	4	1061	-0.177599	0.0273183	97.4	102.6
Q99523	Sortilin OS=Homo sapiens OX=9606 GN=SORT1 PE=1 SV=3	0	9	5	5	831	-0.176323	0.0273183	107.9	92.1
Q92889	DNA repair endonuclease XPF OS=Homo sapiens OX=9606 GN=ERCC4 PE=1 SV=3	0	26	16	16	916	-0.176323	0.027736	107.3	92.7
P49756	RNA-binding protein 25 OS=Homo sapiens OX=9606 GN=RBM25 PE=1 SV=3	0	32	22	22	843	-0.176323	0.0273183	103	97
P35579	Myosin-9 OS=Homo sapiens OX=9606 GN=MYH9 PE=1 SV=4	0	38	56	46	1960	-0.176323	0.0273183	105.7	94.3
A6H8Y1-7	Isoform 7 of Transcription factor TFIIIB component B'' homolog OS=Homo sapiens OX=9606 GN=BDP1	0	9	16	16	2552	-0.176323	0.027673	112.3	87.7
Q96HV5	Transmembrane protein 41A OS=Homo sapiens OX=9606 GN=TMEM41A PE=1 SV=1	0.006	5	1	1	264	-0.175045	0.0273183	103	97
Q5QPR3	Cyclin-dependent kinase 11A OS=Homo sapiens OX=9606 GN=CDK11A PE=1 SV=1	0	38	27	2	779	-0.175045	0.0273183	103.9	96.1
P19021-5	Isoform 5 of Peptidyl-glycine alpha-amidating monooxygenase OS=Homo sapiens OX=9606 GN=PAM	0	12	8	8	974	-0.175045	0.0273183	108.5	91.5
O95201	Zinc finger protein 205 OS=Homo sapiens OX=9606 GN=ZNF205 PE=1 SV=2	0	12	5	5	554	-0.175045	0.0273183	92.9	107.1
O94923	D-glucuronyl C5-epimerase OS=Homo sapiens OX=9606 GN=GLCE PE=1 SV=3	0	16	7	7	617	-0.175045	0.027673	105	95
Q03135	Caveolin-1 OS=Homo sapiens OX=9606 GN=CAV1 PE=1 SV=4	0	20	2	2	178	-0.173767	0.027673	104.5	95.5
A0A0J9YW64	Dedicator of cytokinesis protein 11 (Fragment) OS=Homo sapiens OX=9606 GN=DOCK11 PE=1 SV=1	0	15	23	1	1902	-0.173767	0.0269078	106	94
Q9Y6N5	Sulfide:quinone oxidoreductase, mitochondrial OS=Homo sapiens OX=9606 GN=SQOR PE=1 SV=1	0	15	5	5	450	-0.172488	0.0273183	104.7	95.3
Q8IY81	pre-rRNA 2'-O-ribose RNA methyltransferase FTSJ3 OS=Homo sapiens OX=9606 GN=FTSJ3 PE=1 SV=2	0	35	18	18	847	-0.172488	0.0273183	107.3	92.7
Q8NBI6	Xyloside xylosyltransferase 1 OS=Homo sapiens OX=9606 GN=XXYLT1 PE=1 SV=1	0	16	5	5	393	-0.171207	0.0273183	103.8	96.2
Q15910-2	Isoform 2 of Histone-lysine N-methyltransferase EZH2 OS=Homo sapiens OX=9606 GN=EZH2	0	8	5	5	751	-0.171207	0.0273183	109.2	90.8
O00541	Pescadillo homolog OS=Homo sapiens OX=9606 GN=PES1 PE=1 SV=1	0	32	14	14	588	-0.171207	0.0273183	106.9	93.1
Q9HAU0-6	Isoform 6 of Pleckstrin homology domain-containing family A member 5 OS=Homo sapiens OX=9606 GN=PLEKHA5	0	29	24	24	1282	-0.169925	0.0273183	105.4	94.6
Q9H173	Nucleotide exchange factor SIL1 OS=Homo sapiens OX=9606 GN=SIL1 PE=1 SV=1	0	32	11	11	461	-0.169925	0.0273183	103.8	96.2
Q15366	Poly(rC)-binding protein 2 OS=Homo sapiens OX=9606 GN=PCBP2 PE=1 SV=1	0	53	10	8	365	-0.169925	0.0273183	104.6	95.4
Q12873-3	Isoform 3 of Chromodomain-helicase-DNA-binding protein 3 OS=Homo sapiens OX=9606 GN=CHD3	0	36	50	32	2059	-0.169925	0.0273183	104.7	95.3
J3QS41	Probable helicase with zinc finger domain OS=Homo sapiens OX=9606 GN=HELZ PE=1 SV=1	0	25	34	34	1943	-0.169925	0.0273183	105.5	94.5
E7ETY2	Treacle protein OS=Homo sapiens OX=9606 GN=TCOF1 PE=1 SV=1	0	47	40	3	1488	-0.169925	0.0273183	100.7	99.3
Q9UJ14	Glutathione hydrolase 7 OS=Homo sapiens OX=9606 GN=GGT7 PE=1 SV=2	0	10	5	5	662	-0.168642	0.0273183	106.2	93.8
Q96LT4	Sphingomyelin synthase-related protein 1 OS=Homo sapiens OX=9606 GN=SAMD8 PE=1 SV=2	0	7	2	2	415	-0.168642	0.0273183	105.6	94.4
Q8WVS4	WD repeat-containing protein 60 OS=Homo sapiens OX=9606 GN=WDR60 PE=1 SV=3	0	10	8	8	1066	-0.168642	0.0273183	108.2	91.8
Q96ST8	Centrosomal protein of 89 kDa OS=Homo sapiens OX=9606 GN=CEP89 PE=1 SV=3	0	5	3	3	783	-0.167358	0.0273183	111.2	88.8
Q96DZ1	Endoplasmic reticulum lectin 1 OS=Homo sapiens OX=9606 GN=ERLEC1 PE=1 SV=1	0	35	14	14	483	-0.167358	0.0273183	105.3	94.7
Q5T7M9	Divergent protein kinase domain 1A OS=Homo sapiens OX=9606 GN=DIPK1A PE=2 SV=1	0	11	4	3	428	-0.167358	0.0273183	105.6	94.4
O43251-8	Isoform 8 of RNA binding protein fox-1 homolog 2 OS=Homo sapiens OX=9606 GN=RBFOX2	0	14	4	4	451	-0.167358	0.0273183	77.4	122.6
Q9UN30	Sex comb on midleg-like protein 1 OS=Homo sapiens OX=9606 GN=SCML1 PE=1 SV=2	0	29	6	6	329	-0.166073	0.0273183	106.8	93.2
Q9UKJ3	G patch domain-containing protein 8 OS=Homo sapiens OX=9606 GN=GPATCH8 PE=1 SV=2	0	16	18	17	1502	-0.166073	0.0273183	101.5	98.5
Q9HAU5	Regulator of nonsense transcripts 2 OS=Homo sapiens OX=9606 GN=UPF2 PE=1 SV=1	0	35	32	32	1272	-0.166073	0.0273183	105.2	94.8
Q8N3E9	1-phosphatidylinositol 4,5-bisphosphate phosphodiesterase delta-3 OS=Homo sapiens OX=9606 GN=PLCD3 PE=1 SV=3	0	12	7	7	789	-0.166073	0.0273183	107.1	92.9
Q6ZPD9	Probable C-mannosyltransferase DPY19L3 OS=Homo sapiens OX=9606 GN=DPY19L3 PE=2 SV=1	0	10	5	5	716	-0.166073	0.0273183	110.6	89.4
P50613	Cyclin-dependent kinase 7 OS=Homo sapiens OX=9606 GN=CDK7 PE=1 SV=1	0	21	6	6	346	-0.166073	0.0273183	105.2	94.8
P49755	Transmembrane emp24 domain-containing protein 10 OS=Homo sapiens OX=9606 GN=TMED10 PE=1 SV=2	0	32	6	6	219	-0.166073	0.0273183	85.5	114.5
P21127-3	Isoform 2 of Cyclin-dependent kinase 11B OS=Homo sapiens OX=9606 GN=CDK11B	0	39	28	3	781	-0.166073	0.0273183	104.3	95.7
O94964-2	Isoform 2 of Protein SOGA1 OS=Homo sapiens OX=9606 GN=SOGA1	0	17	22	22	1661	-0.166073	0.0273183	113.8	86.2
O43663-3	Isoform 3 of Protein regulator of cytokinesis 1 OS=Homo sapiens OX=9606 GN=PRC1	0	33	14	1	525	-0.166073	0.0273183	105.7	94.3
Q9UDV7	Zinc finger protein 282 OS=Homo sapiens OX=9606 GN=ZNF282 PE=1 SV=3	0	9	3	3	671	-0.164786	0.0273183	110.3	89.7
Q5VSG8	Glycoprotein endo-alpha-1,2-mannosidase-like protein OS=Homo sapiens OX=9606 GN=MANEAL PE=2 SV=1	0	18	4	4	457	-0.164786	0.0273183	106.3	93.7
Q14435	Polypeptide N-acetylgalactosaminyltransferase 3 OS=Homo sapiens OX=9606 GN=GALNT3 PE=1 SV=2	0	15	7	7	633	-0.164786	0.0273183	104.8	95.2
P12109	Collagen alpha-1(VI) chain OS=Homo sapiens OX=9606 GN=COL6A1 PE=1 SV=3	0	10	7	7	1028	-0.164786	0.0273183	105.7	94.3
J3KQ48	Peptidyl-tRNA hydrolase 2, mitochondrial OS=Homo sapiens OX=9606 GN=PTRH2 PE=1 SV=1	0	23	2	2	180	-0.164786	0.0273183	106.5	93.5
Q9Y625	Glypican-6 OS=Homo sapiens OX=9606 GN=GPC6 PE=1 SV=1	0	5	2	1	555	-0.163499	0.0250984	104.5	95.5
Q9UIW2	Plexin-A1 OS=Homo sapiens OX=9606 GN=PLXNA1 PE=1 SV=3	0	10	15	9	1896	-0.163499	0.0273183	105	95
Q9BY49	Peroxisomal trans-2-enoyl-CoA reductase OS=Homo sapiens OX=9606 GN=PECR PE=1 SV=2	0	20	5	5	303	-0.163499	0.0273183	99.6	100.4
Q7L576	Cytoplasmic FMR1-interacting protein 1 OS=Homo sapiens OX=9606 GN=CYFIP1 PE=1 SV=1	0	11	12	4	1253	-0.163499	0.0273183	109.1	90.9
P38398-7	Isoform 7 of Breast cancer type 1 susceptibility protein OS=Homo sapiens OX=9606 GN=BRCA1	0	13	17	17	1884	-0.163499	0.0273183	105.3	94.7
P25311	Zinc-alpha-2-glycoprotein OS=Homo sapiens OX=9606 GN=AZGP1 PE=1 SV=2	0	12	2	2	298	-0.163499	0.0261843	100.3	99.7
Q07075	Glutamyl aminopeptidase OS=Homo sapiens OX=9606 GN=ENPEP PE=1 SV=3	0	8	6	6	957	-0.16221	0.0273183	104.7	95.3
P16615	Sarcoplasmic/endoplasmic reticulum calcium ATPase 2 OS=Homo sapiens OX=9606 GN=ATP2A2 PE=1 SV=1	0	36	26	26	1042	-0.16221	0.0273183	104.9	95.1
A0A0C4DG89	Probable ATP-dependent RNA helicase DDX46 OS=Homo sapiens OX=9606 GN=DDX46 PE=1 SV=1	0	53	51	1	1032	-0.16221	0.0273183	105.6	94.4
R4GMW8	BIVM-ERCC5 readthrough OS=Homo sapiens OX=9606 GN=BIVM-ERCC5 PE=1 SV=2	0	6	6	6	1640	-0.16092	0.0273183	105.2	94.8
Q9H501	ESF1 homolog OS=Homo sapiens OX=9606 GN=ESF1 PE=1 SV=1	0	22	17	17	851	-0.16092	0.0273183	105.6	94.4
Q9BR77	Coiled-coil domain-containing protein 77 OS=Homo sapiens OX=9606 GN=CCDC77 PE=1 SV=1	0	6	3	3	488	-0.16092	0.0273183	115.1	84.9
Q92759	General transcription factor IIH subunit 4 OS=Homo sapiens OX=9606 GN=GTF2H4 PE=1 SV=1	0	35	11	11	462	-0.16092	0.0273183	111.7	88.3
Q8NHQ9	ATP-dependent RNA helicase DDX55 OS=Homo sapiens OX=9606 GN=DDX55 PE=1 SV=3	0	26	10	10	600	-0.16092	0.0273183	105.4	94.6
Q8NCH0	Carbohydrate sulfotransferase 14 OS=Homo sapiens OX=9606 GN=CHST14 PE=1 SV=2	0	27	8	8	376	-0.16092	0.0273183	103.5	96.5
P33981	Dual specificity protein kinase TTK OS=Homo sapiens OX=9606 GN=TTK PE=1 SV=2	0	5	4	4	857	-0.16092	0.0273183	99.4	100.6
F5GY88	Mediator of RNA polymerase II transcription subunit 24 OS=Homo sapiens OX=9606 GN=MED24 PE=1 SV=2	0	42	30	1	1008	-0.16092	0.0273183	106.7	93.3
Q9NVS2-2	Isoform 2 of 39S ribosomal protein S18a, mitochondrial OS=Homo sapiens OX=9606 GN=MRPS18A	0	9	2	2	270	-0.159629	0.0273183	104.4	95.6
Q9NUL7	Probable ATP-dependent RNA helicase DDX28 OS=Homo sapiens OX=9606 GN=DDX28 PE=1 SV=2	0	40	15	15	540	-0.159629	0.0273183	106	94
Q9BZQ6	ER degradation-enhancing alpha-mannosidase-like protein 3 OS=Homo sapiens OX=9606 GN=EDEM3 PE=1 SV=2	0	30	19	19	932	-0.159629	0.0273183	100.9	99.1
Q6SZW1	Sterile alpha and TIR motif-containing protein 1 OS=Homo sapiens OX=9606 GN=SARM1 PE=1 SV=1	0	28	16	16	724	-0.159629	0.0273183	102.3	97.7
Q02413	Desmoglein-1 OS=Homo sapiens OX=9606 GN=DSG1 PE=1 SV=2	0	10	7	7	1049	-0.159629	0.0273183	107.2	92.8
A0A3F2YNY6	Pre-mRNA-processing factor 40 homolog A OS=Homo sapiens OX=9606 GN=PRPF40A PE=1 SV=1	0	23	21	3	994	-0.159629	0.0273183	108.7	91.3
Q96QZ7-2	Isoform 2 of Membrane-associated guanylate kinase, WW and PDZ domain-containing protein 1 OS=Homo sapiens OX=9606 GN=MAGI1	0	7	7	7	1462	-0.158337	0.0273183	105.9	94.1
Q16706	Alpha-mannosidase 2 OS=Homo sapiens OX=9606 GN=MAN2A1 PE=1 SV=2	0	23	20	19	1144	-0.158337	0.0273183	105.5	94.5
H3BPE7	RNA-binding protein FUS OS=Homo sapiens OX=9606 GN=FUS PE=1 SV=1	0	7	3	2	527	-0.158337	0.0273183	105.9	94.1
A0A0G2JPT5	Cell cycle checkpoint protein RAD17 OS=Homo sapiens OX=9606 GN=RAD17 PE=1 SV=1	0	9	5	5	681	-0.158337	0.0273183	104.1	95.9
Q13439-5	Isoform 5 of Golgin subfamily A member 4 OS=Homo sapiens OX=9606 GN=GOLGA4	0	26	47	47	2243	-0.157044	0.0273183	104.2	95.8
A0A0D9SFM0	E3 ubiquitin-protein ligase SHPRH OS=Homo sapiens OX=9606 GN=SHPRH PE=1 SV=1	0	23	28	28	1687	-0.157044	0.0273183	104.6	95.4
Q9H6S0	3'-5' RNA helicase YTHDC2 OS=Homo sapiens OX=9606 GN=YTHDC2 PE=1 SV=2	0	32	36	36	1430	-0.155749	0.0273183	106.3	93.7
Q9H0U9	Testis-specific Y-encoded-like protein 1 OS=Homo sapiens OX=9606 GN=TSPYL1 PE=1 SV=3	0	38	10	10	437	-0.155749	0.0273183	104.2	95.8
Q99996-1	Isoform 1 of A-kinase anchor protein 9 OS=Homo sapiens OX=9606 GN=AKAP9	0	13	38	38	3911	-0.155749	0.0273183	108.3	91.7
Q93063-3	Isoform 3 of Exostosin-2 OS=Homo sapiens OX=9606 GN=EXT2	0	34	19	19	751	-0.155749	0.0273183	103	97
Q8IXM3	39S ribosomal protein L41, mitochondrial OS=Homo sapiens OX=9606 GN=MRPL41 PE=1 SV=1	0	55	5	5	137	-0.155749	0.0273183	105	95
Q8IWX8	Calcium homeostasis endoplasmic reticulum protein OS=Homo sapiens OX=9606 GN=CHERP PE=1 SV=3	0	35	24	24	916	-0.155749	0.0273183	104.8	95.2
P62487	DNA-directed RNA polymerase II subunit RPB7 OS=Homo sapiens OX=9606 GN=POLR2G PE=1 SV=1	0	48	6	6	172	-0.155749	0.0273183	108.3	91.7
P35240-2	Isoform 2 of Merlin OS=Homo sapiens OX=9606 GN=NF2	0	12	6	6	620	-0.155749	0.0273183	104.2	95.8
P29401-2	Isoform 2 of Transketolase OS=Homo sapiens OX=9606 GN=TKT	0	8	3	3	631	-0.155749	0.0261843	106.4	93.6
F8VU11	PRP40 pre-mRNA processing factor 40 homolog B (Yeast), isoform CRA_a OS=Homo sapiens OX=9606 GN=PRPF40B PE=1 SV=2	0	10	7	6	892	-0.155749	0.0273183	97.3	102.7
Q92575	UBX domain-containing protein 4 OS=Homo sapiens OX=9606 GN=UBXN4 PE=1 SV=2	0	10	3	3	508	-0.154454	0.0273183	99.5	100.5
Q8NAT1	Protein O-linked-mannose beta-1,4-N-acetylglucosaminyltransferase 2 OS=Homo sapiens OX=9606 GN=POMGNT2 PE=1 SV=1	0	9	4	4	580	-0.154454	0.0273183	110.3	89.7
Q86XE3	Calcium uptake protein 3, mitochondrial OS=Homo sapiens OX=9606 GN=MICU3 PE=1 SV=1	0	9	4	4	530	-0.154454	0.0273183	107.5	92.5
Q7L7X3	Serine/threonine-protein kinase TAO1 OS=Homo sapiens OX=9606 GN=TAOK1 PE=1 SV=1	0	10	9	6	1001	-0.154454	0.0273183	105	95
P01911	HLA class II histocompatibility antigen, DRB1-15 beta chain OS=Homo sapiens OX=9606 GN=HLA-DRB1 PE=1 SV=2	0	12	2	2	266	-0.154454	0.0273183	104.7	95.3
Q9UER7	Death domain-associated protein 6 OS=Homo sapiens OX=9606 GN=DAXX PE=1 SV=2	0	37	13	13	740	-0.153157	0.0273183	103.1	96.9
Q9HCC0	Methylcrotonoyl-CoA carboxylase beta chain, mitochondrial OS=Homo sapiens OX=9606 GN=MCCC2 PE=1 SV=1	0	59	23	23	563	-0.153157	0.0273183	106.2	93.8
Q99714	3-hydroxyacyl-CoA dehydrogenase type-2 OS=Homo sapiens OX=9606 GN=HSD17B10 PE=1 SV=3	0	59	10	10	261	-0.153157	0.0273183	100.2	99.8
Q7Z2K6	Endoplasmic reticulum metallopeptidase 1 OS=Homo sapiens OX=9606 GN=ERMP1 PE=1 SV=2	0	5	4	4	904	-0.153157	0.0273183	104.4	95.6
Q5VUG0	Scm-like with four MBT domains protein 2 OS=Homo sapiens OX=9606 GN=SFMBT2 PE=1 SV=1	0	9	6	5	894	-0.153157	0.0273183	94.3	105.7
P98155	Very low-density lipoprotein receptor OS=Homo sapiens OX=9606 GN=VLDLR PE=1 SV=1	0	10	6	6	873	-0.153157	0.0273183	101	99
O00115	Deoxyribonuclease-2-alpha OS=Homo sapiens OX=9606 GN=DNASE2 PE=1 SV=2	0	6	2	2	360	-0.153157	0.0273183	104.9	95.1
Q9NYU2	UDP-glucose:glycoprotein glucosyltransferase 1 OS=Homo sapiens OX=9606 GN=UGGT1 PE=1 SV=3	0	51	55	51	1555	-0.151859	0.0273183	103.2	96.8
Q9H7E9-2	Isoform 2 of UPF0488 protein C8orf33 OS=Homo sapiens OX=9606 GN=C8orf33	0	29	4	4	242	-0.151859	0.0273183	94.2	105.8
Q8NE01	Metal transporter CNNM3 OS=Homo sapiens OX=9606 GN=CNNM3 PE=1 SV=1	0	15	8	8	707	-0.151859	0.0273183	103.5	96.5
Q5T653	39S ribosomal protein L2, mitochondrial OS=Homo sapiens OX=9606 GN=MRPL2 PE=1 SV=2	0	12	2	2	305	-0.151859	0.0273183	108.7	91.3
P48426	Phosphatidylinositol 5-phosphate 4-kinase type-2 alpha OS=Homo sapiens OX=9606 GN=PIP4K2A PE=1 SV=2	0	17	5	3	406	-0.151859	0.0273183	107.6	92.4
P14543	Nidogen-1 OS=Homo sapiens OX=9606 GN=NID1 PE=1 SV=3	0	17	15	14	1247	-0.151859	0.0273183	97.3	102.7
P00387-3	Isoform 3 of NADH-cytochrome b5 reductase 3 OS=Homo sapiens OX=9606 GN=CYB5R3	0	19	4	4	334	-0.151859	0.0273183	101.7	98.3
O14656	Torsin-1A OS=Homo sapiens OX=9606 GN=TOR1A PE=1 SV=1	0	30	9	8	332	-0.151859	0.0273183	105	95
F6R0L0	SUMO-interacting motif-containing protein 1 OS=Homo sapiens OX=9606 GN=SIMC1 PE=1 SV=1	0	8	5	5	891	-0.151859	0.0226897	99.2	100.8
Q9BZE1	39S ribosomal protein L37, mitochondrial OS=Homo sapiens OX=9606 GN=MRPL37 PE=1 SV=2	0	22	7	7	423	-0.15056	0.0273183	106.8	93.2
Q9BU76	Multiple myeloma tumor-associated protein 2 OS=Homo sapiens OX=9606 GN=MMTAG2 PE=1 SV=1	0	29	6	6	263	-0.15056	0.0273183	104.4	95.6
Q6PI48	Aspartate--tRNA ligase, mitochondrial OS=Homo sapiens OX=9606 GN=DARS2 PE=1 SV=1	0	7	3	3	645	-0.15056	0.0265731	104.2	95.8
Q6P5Z2	Serine/threonine-protein kinase N3 OS=Homo sapiens OX=9606 GN=PKN3 PE=1 SV=1	0	26	16	15	889	-0.15056	0.0273183	101.9	98.1
Q15696	U2 small nuclear ribonucleoprotein auxiliary factor 35 kDa subunit-related protein 2 OS=Homo sapiens OX=9606 GN=ZRSR2 PE=1 SV=2	0	16	7	7	482	-0.15056	0.0273183	105.7	94.3
Q9H8M5	Metal transporter CNNM2 OS=Homo sapiens OX=9606 GN=CNNM2 PE=1 SV=2	0	5	3	2	875	-0.149259	0.0229215	96.8	103.2
Q8N5C6	S1 RNA-binding domain-containing protein 1 OS=Homo sapiens OX=9606 GN=SRBD1 PE=1 SV=2	0	24	18	18	995	-0.149259	0.0273183	104.8	95.2
P30040	Endoplasmic reticulum resident protein 29 OS=Homo sapiens OX=9606 GN=ERP29 PE=1 SV=4	0	33	6	6	261	-0.149259	0.0273183	104.1	95.9
A0A087WU02	Endoplasmic reticulum-Golgi intermediate compartment protein 2 OS=Homo sapiens OX=9606 GN=ERGIC2 PE=1 SV=1	0	19	5	5	386	-0.149259	0.0273183	106.1	93.9
Q9P244	Leucine-rich repeat and fibronectin type III domain-containing protein 1 OS=Homo sapiens OX=9606 GN=LRFN1 PE=1 SV=2	0	16	8	8	771	-0.147958	0.0273183	105.1	94.9
Q96HJ9	Protein FMC1 homolog OS=Homo sapiens OX=9606 GN=FMC1 PE=1 SV=2	0	21	2	2	113	-0.147958	0.0261843	104.6	95.4
Q7L014	Probable ATP-dependent RNA helicase DDX46 OS=Homo sapiens OX=9606 GN=DDX46 PE=1 SV=2	0	53	51	1	1031	-0.147958	0.0273183	104.2	95.8
Q6ZNB6	NF-X1-type zinc finger protein NFXL1 OS=Homo sapiens OX=9606 GN=NFXL1 PE=1 SV=2	0	28	16	16	911	-0.147958	0.0273183	105.3	94.7
Q13823	Nucleolar GTP-binding protein 2 OS=Homo sapiens OX=9606 GN=GNL2 PE=1 SV=1	0	26	14	14	731	-0.147958	0.0273183	107	93
P32121-3	Isoform 2 of Beta-arrestin-2 OS=Homo sapiens OX=9606 GN=ARRB2	0	41	11	11	421	-0.147958	0.0273183	109.1	90.9
Q4KMP7	TBC1 domain family member 10B OS=Homo sapiens OX=9606 GN=TBC1D10B PE=1 SV=3	0	14	6	6	808	-0.146655	0.0273183	107	93
O43684	Mitotic checkpoint protein BUB3 OS=Homo sapiens OX=9606 GN=BUB3 PE=1 SV=1	0	53	13	13	328	-0.146655	0.0273183	104.7	95.3
O14617-5	Isoform 5 of AP-3 complex subunit delta-1 OS=Homo sapiens OX=9606 GN=AP3D1	0	28	26	26	1215	-0.146655	0.0273183	101.8	98.2
Q96CS4	Zinc finger protein 689 OS=Homo sapiens OX=9606 GN=ZNF689 PE=1 SV=1	0	8	3	3	500	-0.145351	0.0273183	101.1	98.9
Q4G0J3-3	Isoform 3 of La-related protein 7 OS=Homo sapiens OX=9606 GN=LARP7	0	28	14	14	589	-0.145351	0.0273183	105.2	94.8
Q3ZAQ7	Vacuolar ATPase assembly integral membrane protein VMA21 OS=Homo sapiens OX=9606 GN=VMA21 PE=1 SV=1	0	25	2	2	101	-0.145351	0.0240261	177.1	22.9
O00754	Lysosomal alpha-mannosidase OS=Homo sapiens OX=9606 GN=MAN2B1 PE=1 SV=3	0	21	16	16	1011	-0.145351	0.0273183	105.4	94.6
Q15019-2	Isoform 2 of Septin-2 OS=Homo sapiens OX=9606 GN=SEPTIN2	0	6	2	2	396	-0.144046	0.0229215	102.8	97.2
P05067	Amyloid-beta precursor protein OS=Homo sapiens OX=9606 GN=APP PE=1 SV=3	0	21	12	12	770	-0.144046	0.0273183	104.8	95.2
O75449	Katanin p60 ATPase-containing subunit A1 OS=Homo sapiens OX=9606 GN=KATNA1 PE=1 SV=1	0	22	8	8	491	-0.144046	0.0273183	106.6	93.4
G0XQ39	STIM1L OS=Homo sapiens OX=9606 GN=STIM1 PE=1 SV=1	0	14	8	8	791	-0.144046	0.0273183	104.9	95.1
Q8WXA9-2	Isoform 2 of Splicing regulatory glutamine/lysine-rich protein 1 OS=Homo sapiens OX=9606 GN=SREK1	0	24	10	10	624	-0.14274	0.0273183	105.9	94.1
Q7Z628	Neuroepithelial cell-transforming gene 1 protein OS=Homo sapiens OX=9606 GN=NET1 PE=1 SV=1	0	5	2	2	596	-0.14274	0.0226897	103.6	96.4
Q14137	Ribosome biogenesis protein BOP1 OS=Homo sapiens OX=9606 GN=BOP1 PE=1 SV=2	0	31	14	14	746	-0.14274	0.0273183	103.9	96.1
Q13510-2	Isoform 2 of Acid ceramidase OS=Homo sapiens OX=9606 GN=ASAH1	0	14	5	2	411	-0.14274	0.0273183	105	95
P51805	Plexin-A3 OS=Homo sapiens OX=9606 GN=PLXNA3 PE=1 SV=2	0	15	20	15	1871	-0.14274	0.0273183	104.3	95.7
P41162	ETS translocation variant 3 OS=Homo sapiens OX=9606 GN=ETV3 PE=1 SV=2	0	6	2	2	512	-0.14274	0.0226897	59.8	140.2
P19022	Cadherin-2 OS=Homo sapiens OX=9606 GN=CDH2 PE=1 SV=4	0	23	14	14	906	-0.14274	0.0273183	100.5	99.5
Q9UPN3-2	Isoform 2 of Microtubule-actin cross-linking factor 1, isoforms 1/2/3/5 OS=Homo sapiens OX=9606 GN=MACF1	0	33	128	3	5430	-0.141433	0.0273183	103.8	96.2
Q99959-2	Isoform 1 of Plakophilin-2 OS=Homo sapiens OX=9606 GN=PKP2	0	33	18	18	837	-0.141433	0.0273183	105.8	94.2
Q8NBP0	Tetratricopeptide repeat protein 13 OS=Homo sapiens OX=9606 GN=TTC13 PE=2 SV=3	0	43	29	29	860	-0.141433	0.0273183	105.9	94.1
Q3ZCQ8-2	Isoform 2 of Mitochondrial import inner membrane translocase subunit TIM50 OS=Homo sapiens OX=9606 GN=TIMM50	0	18	6	6	456	-0.141433	0.0273183	104.4	95.6
Q14562	ATP-dependent RNA helicase DHX8 OS=Homo sapiens OX=9606 GN=DHX8 PE=1 SV=1	0	40	37	36	1220	-0.141433	0.0273183	103.9	96.1
P50990	T-complex protein 1 subunit theta OS=Homo sapiens OX=9606 GN=CCT8 PE=1 SV=4	0	38	17	17	548	-0.141433	0.0273183	103.8	96.2
Q9Y4L1	Hypoxia up-regulated protein 1 OS=Homo sapiens OX=9606 GN=HYOU1 PE=1 SV=1	0	46	32	32	999	-0.140124	0.0273183	102.1	97.9
Q96MM7-4	Isoform 4 of Heparan-sulfate 6-O-sulfotransferase 2 OS=Homo sapiens OX=9606 GN=HS6ST2	0	8	5	5	645	-0.140124	0.0261843	102.1	97.9
Q6WKZ4	Rab11 family-interacting protein 1 OS=Homo sapiens OX=9606 GN=RAB11FIP1 PE=1 SV=3	0	25	19	18	1283	-0.140124	0.0273183	103.9	96.1
P35527	Keratin, type I cytoskeletal 9 OS=Homo sapiens OX=9606 GN=KRT9 PE=1 SV=3	0	69	24	24	623	-0.140124	0.0273183	104.2	95.8
A0A2R8Y6W8	General transcription and DNA repair factor IIH helicase subunit XPB OS=Homo sapiens OX=9606 GN=ERCC3 PE=1 SV=1	0	37	21	21	807	-0.140124	0.0273183	107.3	92.7
Q9BQ70	Transcription factor 25 OS=Homo sapiens OX=9606 GN=TCF25 PE=1 SV=1	0	8	3	3	676	-0.138814	0.0241615	103	97
Q96P11-4	Isoform 4 of Probable 28S rRNA (cytosine-C(5))-methyltransferase OS=Homo sapiens OX=9606 GN=NSUN5	0	38	13	13	470	-0.138814	0.0273183	106.3	93.7
Q96LT9-2	Isoform 2 of RNA-binding region-containing protein 3 OS=Homo sapiens OX=9606 GN=RNPC3	0	22	8	1	516	-0.138814	0.0273183	102.8	97.2
Q96L58	Beta-1,3-galactosyltransferase 6 OS=Homo sapiens OX=9606 GN=B3GALT6 PE=1 SV=2	0	24	6	6	329	-0.138814	0.0273183	111.2	88.8
Q8IZ52	Chondroitin sulfate synthase 2 OS=Homo sapiens OX=9606 GN=CHPF PE=1 SV=2	0	14	9	9	775	-0.138814	0.0273183	101.6	98.4
P39060	Collagen alpha-1(XVIII) chain OS=Homo sapiens OX=9606 GN=COL18A1 PE=1 SV=5	0	13	14	14	1754	-0.138814	0.0273183	105.7	94.3
P02754	Beta-lactoglobulin OS=Bos taurus GN=LGB PE=1 SV=3	0	19	3	3	178	-0.138814	0.0273183	99.9	100.1
O95218	Zinc finger Ran-binding domain-containing protein 2 OS=Homo sapiens OX=9606 GN=ZRANB2 PE=1 SV=2	0	30	9	9	330	-0.138814	0.0270903	106.5	93.5
Q9H079	KATNB1-like protein 1 OS=Homo sapiens OX=9606 GN=KATNBL1 PE=1 SV=1	0	11	2	2	304	-0.137504	0.0226897	104.7	95.3
Q96D53	Atypical kinase COQ8B, mitochondrial OS=Homo sapiens OX=9606 GN=COQ8B PE=1 SV=2	0	13	4	4	544	-0.137504	0.0273183	103.7	96.3
Q86W74	Ankyrin repeat domain-containing protein 46 OS=Homo sapiens OX=9606 GN=ANKRD46 PE=1 SV=1	0.004	5	1	1	232	-0.137504	0.0250984	104.5	95.5
Q49AM1	Transcription termination factor 2, mitochondrial OS=Homo sapiens OX=9606 GN=MTERF2 PE=1 SV=2	0	9	3	3	385	-0.137504	0.0202679	105.1	94.9
P62875	DNA-directed RNA polymerases I, II, and III subunit RPABC5 OS=Homo sapiens OX=9606 GN=POLR2L PE=1 SV=1	0.004	13	1	1	67	-0.137504	0.0273183	105.2	94.8
P55081	Microfibrillar-associated protein 1 OS=Homo sapiens OX=9606 GN=MFAP1 PE=1 SV=2	0	38	15	15	439	-0.137504	0.0267414	106.2	93.8
P51636	Caveolin-2 OS=Homo sapiens OX=9606 GN=CAV2 PE=1 SV=2	0.002	11	1	1	162	-0.137504	0.0261843	105.2	94.8
P29322-2	Isoform 2 of Ephrin type-A receptor 8 OS=Homo sapiens OX=9606 GN=EPHA8	0	10	3	3	495	-0.137504	0.0267414	103.6	96.4
P11717	Cation-independent mannose-6-phosphate receptor OS=Homo sapiens OX=9606 GN=IGF2R PE=1 SV=3	0	24	43	43	2491	-0.137504	0.0264593	102.3	97.7
Q6P179	Endoplasmic reticulum aminopeptidase 2 OS=Homo sapiens OX=9606 GN=ERAP2 PE=1 SV=2	0	19	17	17	960	-0.136191	0.0273183	105	95
Q15370-2	Isoform 2 of Elongin-B OS=Homo sapiens OX=9606 GN=ELOB	0	25	3	3	161	-0.136191	0.0273183	102.8	97.2
Q15051	IQ calmodulin-binding motif-containing protein 1 OS=Homo sapiens OX=9606 GN=IQCB1 PE=1 SV=1	0	14	7	7	598	-0.136191	0.0273183	104.8	95.2
O00264	Membrane-associated progesterone receptor component 1 OS=Homo sapiens OX=9606 GN=PGRMC1 PE=1 SV=3	0	52	6	5	195	-0.136191	0.0261843	103.6	96.4
J3QRS3	Myosin regulatory light chain 12A OS=Homo sapiens OX=9606 GN=MYL12A PE=1 SV=1	0	50	8	8	177	-0.136191	0.0261843	102.7	97.3
Q9BTY2	Plasma alpha-L-fucosidase OS=Homo sapiens OX=9606 GN=FUCA2 PE=1 SV=2	0	24	10	10	467	-0.134878	0.0273183	105	95
Q15543	Transcription initiation factor TFIID subunit 13 OS=Homo sapiens OX=9606 GN=TAF13 PE=1 SV=1	0	17	2	2	124	-0.134878	0.0261843	107	93
O15228	Dihydroxyacetone phosphate acyltransferase OS=Homo sapiens OX=9606 GN=GNPAT PE=1 SV=1	0	10	5	5	680	-0.134878	0.0262001	101.7	98.3
O14578-4	Isoform 4 of Citron Rho-interacting kinase OS=Homo sapiens OX=9606 GN=CIT	0	8	14	14	2069	-0.134878	0.0273183	100.9	99.1
B1AKR6	Dynein light chain roadblock-type 1 OS=Homo sapiens OX=9606 GN=DYNLRB1 PE=1 SV=1	0.001	8	1	1	148	-0.134878	0.0226897	106.2	93.8
V9GYM8	Rho guanine nucleotide exchange factor 2 OS=Homo sapiens OX=9606 GN=ARHGEF2 PE=1 SV=1	0	24	18	18	1031	-0.133564	0.0273183	102.9	97.1
Q9Y6I9	Testis-expressed protein 264 OS=Homo sapiens OX=9606 GN=TEX264 PE=1 SV=1	0	11	3	3	313	-0.133564	0.0226897	102.1	97.9
P30101	Protein disulfide-isomerase A3 OS=Homo sapiens OX=9606 GN=PDIA3 PE=1 SV=4	0	38	14	12	505	-0.133564	0.0261843	99.6	100.4
O95881	Thioredoxin domain-containing protein 12 OS=Homo sapiens OX=9606 GN=TXNDC12 PE=1 SV=1	0	22	3	3	172	-0.133564	0.0273183	104.5	95.5
Q9NRC1	Suppressor of tumorigenicity 7 protein OS=Homo sapiens OX=9606 GN=ST7 PE=1 SV=1	0	8	4	4	585	-0.132248	0.0261843	105.3	94.7
Q8NBS9	Thioredoxin domain-containing protein 5 OS=Homo sapiens OX=9606 GN=TXNDC5 PE=1 SV=2	0	45	16	16	432	-0.132248	0.0261843	108.5	91.5
Q8IVL6	Prolyl 3-hydroxylase 3 OS=Homo sapiens OX=9606 GN=P3H3 PE=1 SV=1	0	32	14	14	736	-0.132248	0.0267414	102.9	97.1
Q7L0Y3	tRNA methyltransferase 10 homolog C OS=Homo sapiens OX=9606 GN=TRMT10C PE=1 SV=2	0	59	22	22	403	-0.132248	0.0261843	102.8	97.2
Q32P28-3	Isoform 3 of Prolyl 3-hydroxylase 1 OS=Homo sapiens OX=9606 GN=P3H1	0	22	12	12	804	-0.132248	0.0273183	105.2	94.8
Q9Y4I1-3	Isoform 3 of Unconventional myosin-Va OS=Homo sapiens OX=9606 GN=MYO5A	0	11	15	12	1880	-0.130931	0.0273183	106.7	93.3
Q96GA3	Protein LTV1 homolog OS=Homo sapiens OX=9606 GN=LTV1 PE=1 SV=1	0	6	2	2	475	-0.130931	0.0226897	104.4	95.6
Q96FL9-3	Isoform 3 of Polypeptide N-acetylgalactosaminyltransferase 14 OS=Homo sapiens OX=9606 GN=GALNT14	0	20	9	1	557	-0.130931	0.0258655	105.4	94.6
Q8N9Q2	Protein SREK1IP1 OS=Homo sapiens OX=9606 GN=SREK1IP1 PE=1 SV=1	0	23	2	2	155	-0.130931	0.0273183	104.5	95.5
Q13523	Serine/threonine-protein kinase PRP4 homolog OS=Homo sapiens OX=9606 GN=PRPF4B PE=1 SV=3	0	27	20	20	1007	-0.130931	0.0258655	102.1	97.9
Q9NRA8-3	Isoform 3 of Eukaryotic translation initiation factor 4E transporter OS=Homo sapiens OX=9606 GN=EIF4ENIF1	0	9	8	8	986	-0.129613	0.0273183	93.9	106.1
Q9BQG0-2	Isoform 2 of Myb-binding protein 1A OS=Homo sapiens OX=9606 GN=MYBBP1A	0	43	43	42	1332	-0.129613	0.0252033	106.7	93.3
Q96AE7	Tetratricopeptide repeat protein 17 OS=Homo sapiens OX=9606 GN=TTC17 PE=1 SV=1	0	24	21	5	1141	-0.129613	0.0251258	104.6	95.4
Q05707-2	Isoform 2 of Collagen alpha-1(XIV) chain OS=Homo sapiens OX=9606 GN=COL14A1	0	27	33	33	1780	-0.129613	0.0251028	104.7	95.3
P01034	Cystatin-C OS=Homo sapiens OX=9606 GN=CST3 PE=1 SV=1	0.003	8	1	1	146	-0.129613	0.0250984	105.8	94.2
O14802	DNA-directed RNA polymerase III subunit RPC1 OS=Homo sapiens OX=9606 GN=POLR3A PE=1 SV=2	0	9	9	9	1390	-0.129613	0.0264212	106.1	93.9
Q8WVK2	U4/U6.U5 small nuclear ribonucleoprotein 27 kDa protein OS=Homo sapiens OX=9606 GN=SNRNP27 PE=1 SV=1	0	23	3	3	155	-0.128293	0.0250984	103.7	96.3
Q8N1G1	RNA exonuclease 1 homolog OS=Homo sapiens OX=9606 GN=REXO1 PE=1 SV=3	0	9	8	8	1221	-0.128293	0.0261843	99.2	100.8
Q9BYN8	28S ribosomal protein S26, mitochondrial OS=Homo sapiens OX=9606 GN=MRPS26 PE=1 SV=1	0	28	6	6	205	-0.126973	0.0250984	105.2	94.8
P13861	cAMP-dependent protein kinase type II-alpha regulatory subunit OS=Homo sapiens OX=9606 GN=PRKAR2A PE=1 SV=2	0	20	6	4	404	-0.126973	0.0261843	102.9	97.1
H0Y368	Dolichol-phosphate mannosyltransferase subunit 1 (Fragment) OS=Homo sapiens OX=9606 GN=DPM1 PE=1 SV=1	0	7	2	2	295	-0.126973	0.0226897	100.1	99.9
Q9Y5M8	Signal recognition particle receptor subunit beta OS=Homo sapiens OX=9606 GN=SRPRB PE=1 SV=3	0	53	11	11	271	-0.125651	0.0250984	102.3	97.7
Q9H4L5	Oxysterol-binding protein-related protein 3 OS=Homo sapiens OX=9606 GN=OSBPL3 PE=1 SV=1	0	35	20	19	887	-0.125651	0.0273183	104.2	95.8
Q9BS26	Endoplasmic reticulum resident protein 44 OS=Homo sapiens OX=9606 GN=ERP44 PE=1 SV=1	0	41	12	12	406	-0.125651	0.0250984	104.8	95.2
Q969V3	Nicalin OS=Homo sapiens OX=9606 GN=NCLN PE=1 SV=2	0	44	19	19	563	-0.125651	0.0250984	103.4	96.6
Q8N129	Protein canopy homolog 4 OS=Homo sapiens OX=9606 GN=CNPY4 PE=2 SV=1	0	36	7	7	248	-0.125651	0.0273183	101.8	98.2
P78316	Nucleolar protein 14 OS=Homo sapiens OX=9606 GN=NOP14 PE=1 SV=3	0	19	12	12	857	-0.125651	0.0273183	103.4	96.6
P42704	Leucine-rich PPR motif-containing protein, mitochondrial OS=Homo sapiens OX=9606 GN=LRPPRC PE=1 SV=3	0	23	25	25	1394	-0.125651	0.0273183	104.4	95.6
P31946	14-3-3 protein beta/alpha OS=Homo sapiens OX=9606 GN=YWHAB PE=1 SV=3	0	17	3	2	246	-0.125651	0.0226897	101.3	98.7
Q9NYU1	UDP-glucose:glycoprotein glucosyltransferase 2 OS=Homo sapiens OX=9606 GN=UGGT2 PE=1 SV=4	0	42	53	49	1516	-0.124328	0.0250984	104.3	95.7
Q9HBM0	Vezatin OS=Homo sapiens OX=9606 GN=VEZT PE=1 SV=3	0	5	3	3	779	-0.124328	0.0250984	103.5	96.5
Q8TDY2	RB1-inducible coiled-coil protein 1 OS=Homo sapiens OX=9606 GN=RB1CC1 PE=1 SV=3	0	11	14	14	1594	-0.124328	0.0273183	91.6	108.4
Q8N1N4	Keratin, type II cytoskeletal 78 OS=Homo sapiens OX=9606 GN=KRT78 PE=1 SV=2	0	11	5	5	520	-0.124328	0.0257895	108.1	91.9
Q4G148	Glucoside xylosyltransferase 1 OS=Homo sapiens OX=9606 GN=GXYLT1 PE=1 SV=2	0	5	2	2	440	-0.124328	0.0241145	102.3	97.7
Q16585	Beta-sarcoglycan OS=Homo sapiens OX=9606 GN=SGCB PE=1 SV=1	0	8	2	2	318	-0.124328	0.0261843	104.3	95.7
Q08431	Lactadherin OS=Homo sapiens OX=9606 GN=MFGE8 PE=1 SV=3	0	14	4	4	387	-0.124328	0.0239619	100.6	99.4
P62834	Ras-related protein Rap-1A OS=Homo sapiens OX=9606 GN=RAP1A PE=1 SV=1	0	20	3	3	184	-0.124328	0.0226897	103.9	96.1
P35580-4	Isoform 4 of Myosin-10 OS=Homo sapiens OX=9606 GN=MYH10	0	41	69	59	2007	-0.124328	0.0250984	103.4	96.6
P18074	General transcription and DNA repair factor IIH helicase subunit XPD OS=Homo sapiens OX=9606 GN=ERCC2 PE=1 SV=1	0	24	12	12	760	-0.124328	0.0273183	98.7	101.3
O95197-3	Isoform 3 of Reticulon-3 OS=Homo sapiens OX=9606 GN=RTN3	0	28	3	3	236	-0.124328	0.0273183	98.6	101.4
H9KVB4	Trinucleotide repeat-containing gene 18 protein OS=Homo sapiens OX=9606 GN=TNRC18 PE=1 SV=1	0	10	21	21	2968	-0.124328	0.0273183	103.1	96.9
G8JLG2	CDSN OS=Homo sapiens OX=9606 GN=CDSN PE=1 SV=1	0	5	2	2	529	-0.124328	0.0250984	103.3	96.7
Q96PY5-3	Isoform 2 of Formin-like protein 2 OS=Homo sapiens OX=9606 GN=FMNL2	0	18	17	12	1092	-0.123004	0.0273183	104.9	95.1
Q6IEE7	Transmembrane protein 132E OS=Homo sapiens OX=9606 GN=TMEM132E PE=1 SV=2	0	9	7	7	1074	-0.123004	0.0250984	103.7	96.3
P53634	Dipeptidyl peptidase 1 OS=Homo sapiens OX=9606 GN=CTSC PE=1 SV=2	0	7	3	3	463	-0.123004	0.0258655	85	115
Q8NHP8	Putative phospholipase B-like 2 OS=Homo sapiens OX=9606 GN=PLBD2 PE=1 SV=2	0	10	5	5	589	-0.121679	0.0241615	107.8	92.2
Q8N5A5	Zinc finger CCCH-type with G patch domain-containing protein OS=Homo sapiens OX=9606 GN=ZGPAT PE=1 SV=3	0	10	4	4	531	-0.121679	0.0267414	108.7	91.3
P54132	Bloom syndrome protein OS=Homo sapiens OX=9606 GN=BLM PE=1 SV=1	0	18	18	17	1417	-0.121679	0.0264212	102.7	97.3
P27824-2	Isoform 2 of Calnexin OS=Homo sapiens OX=9606 GN=CANX	0	31	18	14	627	-0.121679	0.0241615	102.3	97.7
P06280	Alpha-galactosidase A OS=Homo sapiens OX=9606 GN=GLA PE=1 SV=1	0	33	11	11	429	-0.121679	0.0243536	105.9	94.1
O14525	Astrotactin-1 OS=Homo sapiens OX=9606 GN=ASTN1 PE=2 SV=3	0	13	10	10	1302	-0.121679	0.0250984	113.9	86.1
E9PHV5	Protein ITPRID2 OS=Homo sapiens OX=9606 GN=ITPRID2 PE=1 SV=1	0	27	23	23	1237	-0.121679	0.0244753	100.8	99.2
Q9H6R0	ATP-dependent RNA helicase DHX33 OS=Homo sapiens OX=9606 GN=DHX33 PE=1 SV=2	0	5	3	3	707	-0.120352	0.0241145	103.7	96.3
Q96A35	39S ribosomal protein L24, mitochondrial OS=Homo sapiens OX=9606 GN=MRPL24 PE=1 SV=1	0	38	7	7	216	-0.120352	0.0241145	102.8	97.2
Q08380	Galectin-3-binding protein OS=Homo sapiens OX=9606 GN=LGALS3BP PE=1 SV=1	0	42	17	17	585	-0.120352	0.0241145	103.6	96.4
P42785-2	Isoform 2 of Lysosomal Pro-X carboxypeptidase OS=Homo sapiens OX=9606 GN=PRCP	0	14	4	4	517	-0.120352	0.0261843	103.2	96.8
P11142	Heat shock cognate 71 kDa protein OS=Homo sapiens OX=9606 GN=HSPA8 PE=1 SV=1	0	49	24	20	646	-0.120352	0.0241145	103.9	96.1
Q9BUJ2	Heterogeneous nuclear ribonucleoprotein U-like protein 1 OS=Homo sapiens OX=9606 GN=HNRNPUL1 PE=1 SV=2	0	39	27	27	856	-0.119024	0.0241145	102.7	97.3
Q96EU7	C1GALT1-specific chaperone 1 OS=Homo sapiens OX=9606 GN=C1GALT1C1 PE=1 SV=1	0	19	5	5	318	-0.119024	0.0267414	113.7	86.3
Q92692	Nectin-2 OS=Homo sapiens OX=9606 GN=NECTIN2 PE=1 SV=1	0	19	8	8	538	-0.119024	0.0273183	104	96
Q2MV58	Tectonic-1 OS=Homo sapiens OX=9606 GN=TCTN1 PE=2 SV=2	0	17	6	6	587	-0.119024	0.0250984	89.9	110.1
Q9BZK7	F-box-like/WD repeat-containing protein TBL1XR1 OS=Homo sapiens OX=9606 GN=TBL1XR1 PE=1 SV=1	0	30	9	6	514	-0.117695	0.0265858	103.2	96.8
P22413	Ectonucleotide pyrophosphatase/phosphodiesterase family member 1 OS=Homo sapiens OX=9606 GN=ENPP1 PE=1 SV=2	0	28	15	15	925	-0.117695	0.0261949	103.9	96.1
P18615-3	Isoform 2 of Negative elongation factor E OS=Homo sapiens OX=9606 GN=NELFE	0	20	5	5	387	-0.117695	0.0250984	100.8	99.2
P08069	Insulin-like growth factor 1 receptor OS=Homo sapiens OX=9606 GN=IGF1R PE=1 SV=1	0	23	22	19	1367	-0.117695	0.0258655	100.4	99.6
O14646	Chromodomain-helicase-DNA-binding protein 1 OS=Homo sapiens OX=9606 GN=CHD1 PE=1 SV=2	0	25	30	27	1710	-0.117695	0.0240261	101.5	98.5
E7EMK3	Flotillin OS=Homo sapiens OX=9606 GN=FLOT2 PE=1 SV=1	0	5	2	2	483	-0.117695	0.0202679	101.4	98.6
A2RU67	Protein FAM234B OS=Homo sapiens OX=9606 GN=FAM234B PE=1 SV=1	0	9	4	4	622	-0.117695	0.0244984	106.2	93.8
Q9Y3A6	Transmembrane emp24 domain-containing protein 5 OS=Homo sapiens OX=9606 GN=TMED5 PE=1 SV=1	0	27	4	4	229	-0.116365	0.0273183	103.6	96.4
Q9UKZ9	Procollagen C-endopeptidase enhancer 2 OS=Homo sapiens OX=9606 GN=PCOLCE2 PE=1 SV=1	0	8	3	3	415	-0.116365	0.0212744	106.9	93.1
Q9UBV2	Protein sel-1 homolog 1 OS=Homo sapiens OX=9606 GN=SEL1L PE=1 SV=3	0	46	20	20	794	-0.116365	0.0229215	104.9	95.1
Q9NQ29	Putative RNA-binding protein Luc7-like 1 OS=Homo sapiens OX=9606 GN=LUC7L PE=1 SV=1	0	27	10	7	371	-0.116365	0.0229215	106.5	93.5
Q9H6W3	Ribosomal oxygenase 1 OS=Homo sapiens OX=9606 GN=RIOX1 PE=1 SV=2	0	47	20	20	641	-0.116365	0.0229215	106.5	93.5
O75473	Leucine-rich repeat-containing G-protein coupled receptor 5 OS=Homo sapiens OX=9606 GN=LGR5 PE=1 SV=1	0	5	4	3	907	-0.116365	0.0226897	101.9	98.1
O60291-2	Isoform 2 of E3 ubiquitin-protein ligase MGRN1 OS=Homo sapiens OX=9606 GN=MGRN1	0	19	8	8	576	-0.116365	0.0250984	104.7	95.3
A3KMH1	von Willebrand factor A domain-containing protein 8 OS=Homo sapiens OX=9606 GN=VWA8 PE=1 SV=2	0	10	14	14	1905	-0.116365	0.0253772	104	96
Q9ULD2	Microtubule-associated tumor suppressor 1 OS=Homo sapiens OX=9606 GN=MTUS1 PE=1 SV=2	0	5	5	5	1270	-0.115033	0.0250984	105.3	94.7
Q6IAN0	Dehydrogenase/reductase SDR family member 7B OS=Homo sapiens OX=9606 GN=DHRS7B PE=1 SV=2	0	18	6	6	325	-0.115033	0.0265607	99.2	100.8
Q15075	Early endosome antigen 1 OS=Homo sapiens OX=9606 GN=EEA1 PE=1 SV=2	0	40	47	47	1411	-0.115033	0.0226897	101.3	98.7
Q13428-4	Isoform 4 of Treacle protein OS=Homo sapiens OX=9606 GN=TCOF1	0	45	40	3	1524	-0.115033	0.0227959	112.2	87.8
P31944	Caspase-14 OS=Homo sapiens OX=9606 GN=CASP14 PE=1 SV=2	0.008	5	1	1	242	-0.115033	0.0202679	104	96
Q9BT09	Protein canopy homolog 3 OS=Homo sapiens OX=9606 GN=CNPY3 PE=1 SV=1	0	26	5	5	278	-0.1137	0.0229215	103.4	96.6
Q8WUB8	PHD finger protein 10 OS=Homo sapiens OX=9606 GN=PHF10 PE=1 SV=3	0	12	4	4	498	-0.1137	0.0250984	101.7	98.3
Q8IXM2-3	Isoform 3 of Chromatin complexes subunit BAP18 OS=Homo sapiens OX=9606 GN=BAP18	0	38	5	3	192	-0.1137	0.0273183	104	96
Q13162	Peroxiredoxin-4 OS=Homo sapiens OX=9606 GN=PRDX4 PE=1 SV=1	0	59	12	10	271	-0.1137	0.0226897	106.4	93.6
O15144	Actin-related protein 2/3 complex subunit 2 OS=Homo sapiens OX=9606 GN=ARPC2 PE=1 SV=1	0	10	3	3	300	-0.1137	0.0226897	105.6	94.4
A0A2R8Y7Q1	Nucleosome-remodeling factor subunit BPTF OS=Homo sapiens OX=9606 GN=BPTF PE=1 SV=1	0	15	34	1	2965	-0.1137	0.0176771	103.9	96.1
R4GMX3	COMMD3-BMI1 readthrough OS=Homo sapiens OX=9606 GN=COMMD3-BMI1 PE=4 SV=1	0	5	2	2	469	-0.112367	0.0250984	101.4	98.6
Q9P246-2	Isoform 2 of Stromal interaction molecule 2 OS=Homo sapiens OX=9606 GN=STIM2	0	5	3	3	841	-0.112367	0.0241145	129.5	70.5
Q9NYZ3	G2 and S phase-expressed protein 1 OS=Homo sapiens OX=9606 GN=GTSE1 PE=1 SV=3	0	8	4	4	720	-0.112367	0.0241145	104.5	95.5
Q9NQX7	Integral membrane protein 2C OS=Homo sapiens OX=9606 GN=ITM2C PE=1 SV=1	0	23	4	4	267	-0.112367	0.0226897	103.4	96.6
Q96QE5	Transcription elongation factor, mitochondrial OS=Homo sapiens OX=9606 GN=TEFM PE=1 SV=1	0	30	7	7	360	-0.112367	0.0250984	115.5	84.5
Q7Z6J6	FERM domain-containing protein 5 OS=Homo sapiens OX=9606 GN=FRMD5 PE=1 SV=1	0	7	3	3	570	-0.112367	0.0202679	134.7	65.3
Q2TBE0	CWF19-like protein 2 OS=Homo sapiens OX=9606 GN=CWF19L2 PE=1 SV=4	0	31	20	20	894	-0.112367	0.0226897	102.9	97.1
Q9Y383	Putative RNA-binding protein Luc7-like 2 OS=Homo sapiens OX=9606 GN=LUC7L2 PE=1 SV=2	0	34	13	10	392	-0.111031	0.0226897	109.5	90.5
Q9NZ08-2	Isoform 2 of Endoplasmic reticulum aminopeptidase 1 OS=Homo sapiens OX=9606 GN=ERAP1	0	25	19	19	948	-0.111031	0.0273183	99.5	100.5
P49368	T-complex protein 1 subunit gamma OS=Homo sapiens OX=9606 GN=CCT3 PE=1 SV=4	0	43	18	18	545	-0.111031	0.0226897	105.7	94.3
P13747	HLA class I histocompatibility antigen, alpha chain E OS=Homo sapiens OX=9606 GN=HLA-E PE=1 SV=4	0	30	8	6	358	-0.111031	0.0250984	103.6	96.4
O75420	GRB10-interacting GYF protein 1 OS=Homo sapiens OX=9606 GN=GIGYF1 PE=1 SV=2	0	5	3	3	1035	-0.111031	0.0202679	103.9	96.1
Q9BZ29-4	Isoform 4 of Dedicator of cytokinesis protein 9 OS=Homo sapiens OX=9606 GN=DOCK9	0	13	20	20	2093	-0.109695	0.0250984	103.5	96.5
Q96PK6-5	Isoform 5 of RNA-binding protein 14 OS=Homo sapiens OX=9606 GN=RBM14	0	32	6	3	339	-0.109695	0.0261843	103.1	96.9
P0C2W1	F-box/SPRY domain-containing protein 1 OS=Homo sapiens OX=9606 GN=FBXO45 PE=1 SV=1	0	7	2	2	286	-0.109695	0.0173157	105.9	94.1
P07858	Cathepsin B OS=Homo sapiens OX=9606 GN=CTSB PE=1 SV=3	0	14	3	3	339	-0.109695	0.0202679	106.1	93.9
Q9UMX5	Neudesin OS=Homo sapiens OX=9606 GN=NENF PE=1 SV=1	0	52	6	6	172	-0.108357	0.0268663	103.5	96.5
Q9NSI2	Protein FAM207A OS=Homo sapiens OX=9606 GN=FAM207A PE=1 SV=2	0	42	8	8	230	-0.108357	0.0261843	101.8	98.2
Q86Y07	Serine/threonine-protein kinase VRK2 OS=Homo sapiens OX=9606 GN=VRK2 PE=1 SV=3	0	8	3	3	508	-0.108357	0.0238566	103.2	96.8
Q86XX4-2	Isoform 2 of Extracellular matrix protein FRAS1 OS=Homo sapiens OX=9606 GN=FRAS1	0	9	24	23	4012	-0.108357	0.0250984	105.2	94.8
P68363	Tubulin alpha-1B chain OS=Homo sapiens OX=9606 GN=TUBA1B PE=1 SV=1	0	49	15	15	451	-0.108357	0.0226897	104.8	95.2
J3KPS0	DnaJ (Hsp40) homolog, subfamily B, member 12, isoform CRA_c OS=Homo sapiens OX=9606 GN=DNAJB12 PE=1 SV=1	0	15	4	4	409	-0.108357	0.0250984	105.3	94.7
Q9H5K3	Protein O-mannose kinase OS=Homo sapiens OX=9606 GN=POMK PE=1 SV=1	0	23	5	5	350	-0.107018	0.0241615	102.6	97.4
P53708	Integrin alpha-8 OS=Homo sapiens OX=9606 GN=ITGA8 PE=1 SV=3	0	5	4	4	1063	-0.107018	0.0243536	111.7	88.3
F8WAR4	MICOS complex subunit OS=Homo sapiens OX=9606 GN=CHCHD3 PE=1 SV=1	0	11	2	2	241	-0.107018	0.0250984	103	97
A0A0S2Z4L3	Protein S isoform 2 (Fragment) OS=Homo sapiens OX=9606 GN=PROS1 PE=1 SV=1	0	9	5	5	708	-0.107018	0.0226897	105.6	94.4
Q9HC36	rRNA methyltransferase 3, mitochondrial OS=Homo sapiens OX=9606 GN=MRM3 PE=1 SV=2	0	15	6	6	420	-0.105678	0.0250984	102.7	97.3
Q9BTV7	CDK5 and ABL1 enzyme substrate 2 OS=Homo sapiens OX=9606 GN=CABLES2 PE=1 SV=3	0	9	3	3	478	-0.105678	0.0173157	103.6	96.4
Q92576	PHD finger protein 3 OS=Homo sapiens OX=9606 GN=PHF3 PE=1 SV=3	0	19	24	23	2039	-0.105678	0.0226897	106.3	93.7
O15446	DNA-directed RNA polymerase I subunit RPA34 OS=Homo sapiens OX=9606 GN=CD3EAP PE=1 SV=1	0	45	11	11	510	-0.105678	0.0258655	104.8	95.2
X6R3P0	Slit homolog 2 protein OS=Homo sapiens OX=9606 GN=SLIT2 PE=1 SV=1	0	29	29	29	1542	-0.104337	0.021325	104.1	95.9
Q9NS69	Mitochondrial import receptor subunit TOM22 homolog OS=Homo sapiens OX=9606 GN=TOMM22 PE=1 SV=3	0.003	8	1	1	142	-0.104337	0.0180482	101.6	98.4
Q09666	Neuroblast differentiation-associated protein AHNAK OS=Homo sapiens OX=9606 GN=AHNAK PE=1 SV=2	0	6	10	10	5890	-0.104337	0.0241145	113	87
Q00587	Cdc42 effector protein 1 OS=Homo sapiens OX=9606 GN=CDC42EP1 PE=1 SV=1	0.003	8	2	2	391	-0.104337	0.0173157	98.9	101.1
O60513	Beta-1,4-galactosyltransferase 4 OS=Homo sapiens OX=9606 GN=B4GALT4 PE=1 SV=1	0	9	2	2	344	-0.104337	0.0173157	103.6	96.4
A0A0A0MQU6	Sema domain, transmembrane domain (TM), and cytoplasmic domain, (Semaphorin) 6A, isoform CRA_d OS=Homo sapiens OX=9606 GN=SEMA6A PE=1 SV=1	0	11	8	8	1047	-0.104337	0.0226897	122.1	77.9
Q8TCJ2	Dolichyl-diphosphooligosaccharide--protein glycosyltransferase subunit STT3B OS=Homo sapiens OX=9606 GN=STT3B PE=1 SV=1	0	14	11	9	826	-0.102994	0.0204513	104.9	95.1
Q6P280	Zinc finger protein 529 OS=Homo sapiens OX=9606 GN=ZNF529 PE=1 SV=2	0	7	3	3	563	-0.102994	0.0173157	103.5	96.5
Q14CZ7	FAST kinase domain-containing protein 3, mitochondrial OS=Homo sapiens OX=9606 GN=FASTKD3 PE=1 SV=2	0	8	4	4	662	-0.102994	0.022026	100.6	99.4
P52429	Diacylglycerol kinase epsilon OS=Homo sapiens OX=9606 GN=DGKE PE=1 SV=1	0	20	8	8	567	-0.102994	0.0241145	104.4	95.6
P35908	Keratin, type II cytoskeletal 2 epidermal OS=Homo sapiens OX=9606 GN=KRT2 PE=1 SV=2	0	52	26	21	639	-0.102994	0.0202679	99.3	100.7
Q8IXZ2	Zinc finger CCCH domain-containing protein 3 OS=Homo sapiens OX=9606 GN=ZC3H3 PE=1 SV=3	0	6	4	4	948	-0.10165	0.0222285	105.6	94.4
Q7Z460	CLIP-associating protein 1 OS=Homo sapiens OX=9606 GN=CLASP1 PE=1 SV=1	0	28	31	1	1538	-0.10165	0.0202679	103.8	96.2
Q15818	Neuronal pentraxin-1 OS=Homo sapiens OX=9606 GN=NPTX1 PE=2 SV=2	0	18	7	7	432	-0.10165	0.0226897	92.5	107.5
Q15058	Kinesin-like protein KIF14 OS=Homo sapiens OX=9606 GN=KIF14 PE=1 SV=1	0	15	18	18	1648	-0.10165	0.0250984	101.5	98.5
O94898	Leucine-rich repeats and immunoglobulin-like domains protein 2 OS=Homo sapiens OX=9606 GN=LRIG2 PE=2 SV=3	0	23	19	18	1065	-0.10165	0.0202679	101.5	98.5
G5E9E7	Tight junction protein 1 (Zona occludens 1), isoform CRA_e OS=Homo sapiens OX=9606 GN=TJP1 PE=1 SV=1	0	28	32	32	1692	-0.10165	0.0202679	103.5	96.5
Q9P035	Very-long-chain (3R)-3-hydroxyacyl-CoA dehydratase 3 OS=Homo sapiens OX=9606 GN=HACD3 PE=1 SV=2	0	25	8	8	362	-0.100305	0.0226897	103.5	96.5
Q99728	BRCA1-associated RING domain protein 1 OS=Homo sapiens OX=9606 GN=BARD1 PE=1 SV=2	0	21	12	12	777	-0.100305	0.0241145	103.7	96.3
Q92545	Transmembrane protein 131 OS=Homo sapiens OX=9606 GN=TMEM131 PE=1 SV=3	0	24	29	29	1883	-0.100305	0.0202679	104.1	95.9
Q86WA8	Lon protease homolog 2, peroxisomal OS=Homo sapiens OX=9606 GN=LONP2 PE=1 SV=1	0	8	5	5	852	-0.100305	0.0180872	100.1	99.9
Q86UK7	E3 ubiquitin-protein ligase ZNF598 OS=Homo sapiens OX=9606 GN=ZNF598 PE=1 SV=1	0	12	8	8	904	-0.100305	0.0229215	102.5	97.5
Q6NUK4	Receptor expression-enhancing protein 3 OS=Homo sapiens OX=9606 GN=REEP3 PE=1 SV=1	0	34	5	5	255	-0.100305	0.0223145	109.8	90.2
Q5T1Z8	Pumilio homolog 1 OS=Homo sapiens OX=9606 GN=PUM1 PE=1 SV=1	0	9	9	1	1224	-0.100305	0.0226897	103.9	96.1
P38571	Lysosomal acid lipase/cholesteryl ester hydrolase OS=Homo sapiens OX=9606 GN=LIPA PE=1 SV=2	0	7	2	2	399	-0.100305	0.0226897	105.8	94.2
Q9H5V9	UPF0428 protein CXorf56 OS=Homo sapiens OX=9606 GN=CXorf56 PE=1 SV=1	0	26	5	5	222	-0.0989585	0.0226897	88.5	111.5
Q9BVI4	Nucleolar complex protein 4 homolog OS=Homo sapiens OX=9606 GN=NOC4L PE=1 SV=1	0	27	11	11	516	-0.0989585	0.0254882	102.1	97.9
Q66PJ3	ADP-ribosylation factor-like protein 6-interacting protein 4 OS=Homo sapiens OX=9606 GN=ARL6IP4 PE=1 SV=2	0	18	5	5	421	-0.0989585	0.0197901	101	99
Q16611	Bcl-2 homologous antagonist/killer OS=Homo sapiens OX=9606 GN=BAK1 PE=1 SV=1	0	33	4	4	211	-0.0989585	0.0218117	94.7	105.3
Q01085-2	Isoform 2 of Nucleolysin TIAR OS=Homo sapiens OX=9606 GN=TIAL1	0	13	4	2	392	-0.0989585	0.0197901	102.2	97.8
O95158	Neurexophilin-4 OS=Homo sapiens OX=9606 GN=NXPH4 PE=2 SV=3	0.003	5	1	1	308	-0.0989585	0.0173157	103.4	96.6
O14967	Calmegin OS=Homo sapiens OX=9606 GN=CLGN PE=1 SV=1	0	19	9	8	610	-0.0989585	0.0229215	103.6	96.4
Q86X52	Chondroitin sulfate synthase 1 OS=Homo sapiens OX=9606 GN=CHSY1 PE=1 SV=3	0	8	5	4	802	-0.0976108	0.0173157	105.2	94.8
Q5VU97	VWFA and cache domain-containing protein 1 OS=Homo sapiens OX=9606 GN=CACHD1 PE=2 SV=2	0	11	10	10	1274	-0.0976108	0.0226897	125.1	74.9
Q5T160	Probable arginine--tRNA ligase, mitochondrial OS=Homo sapiens OX=9606 GN=RARS2 PE=1 SV=1	0	11	5	5	578	-0.0976108	0.0226897	103.2	96.8
P35251	Replication factor C subunit 1 OS=Homo sapiens OX=9606 GN=RFC1 PE=1 SV=4	0	31	24	24	1148	-0.0976108	0.0197901	101.4	98.6
O95707	Ribonuclease P protein subunit p29 OS=Homo sapiens OX=9606 GN=POP4 PE=1 SV=2	0	9	2	2	220	-0.0976108	0.0197901	106.7	93.3
O43422	52 kDa repressor of the inhibitor of the protein kinase OS=Homo sapiens OX=9606 GN=THAP12 PE=1 SV=2	0	7	4	4	761	-0.0976108	0.0202679	108.2	91.8
Q9NVV4	Poly(A) RNA polymerase, mitochondrial OS=Homo sapiens OX=9606 GN=MTPAP PE=1 SV=1	0	32	12	12	582	-0.0962619	0.0226897	98.5	101.5
Q9NVN8	Guanine nucleotide-binding protein-like 3-like protein OS=Homo sapiens OX=9606 GN=GNL3L PE=1 SV=1	0	39	18	18	582	-0.0962619	0.0197901	102.5	97.5
Q92791	Endoplasmic reticulum protein SC65 OS=Homo sapiens OX=9606 GN=P3H4 PE=1 SV=1	0	32	11	11	437	-0.0962619	0.0197901	105.1	94.9
Q5KU26	Collectin-12 OS=Homo sapiens OX=9606 GN=COLEC12 PE=1 SV=3	0	14	9	9	742	-0.0962619	0.025727	98.5	101.5
P78346-2	Isoform 2 of Ribonuclease P protein subunit p30 OS=Homo sapiens OX=9606 GN=RPP30	0	25	5	5	322	-0.0962619	0.0202679	103.4	96.6
P52701	DNA mismatch repair protein Msh6 OS=Homo sapiens OX=9606 GN=MSH6 PE=1 SV=2	0	18	17	17	1360	-0.0962619	0.0229215	108.3	91.7
M0QXB4	Coatomer protein complex, subunit epsilon, isoform CRA_g OS=Homo sapiens OX=9606 GN=COPE PE=1 SV=1	0	21	5	5	331	-0.0962619	0.0229215	103.5	96.5
Q9BRR6	ADP-dependent glucokinase OS=Homo sapiens OX=9606 GN=ADPGK PE=1 SV=1	0	18	6	6	497	-0.0949116	0.0180482	94.6	105.4
Q92520	Protein FAM3C OS=Homo sapiens OX=9606 GN=FAM3C PE=1 SV=1	0	30	5	5	227	-0.0949116	0.0226897	89.4	110.6
A0A087WT30	Uncharacterized protein C12orf45 OS=Homo sapiens OX=9606 GN=C12orf45 PE=1 SV=2	0.001	8	1	1	211	-0.0949116	0.0156352	103.3	96.7
Q9NRP0-2	Isoform 2 of Oligosaccharyltransferase complex subunit OSTC OS=Homo sapiens OX=9606 GN=OSTC	0.001	7	1	1	171	-0.0935602	0.0229215	103.2	96.8
Q9HB40	Retinoid-inducible serine carboxypeptidase OS=Homo sapiens OX=9606 GN=SCPEP1 PE=1 SV=1	0	23	8	8	452	-0.0935602	0.0226897	106.4	93.6
Q9BU23	Lipase maturation factor 2 OS=Homo sapiens OX=9606 GN=LMF2 PE=1 SV=2	0	5	3	3	707	-0.0935602	0.0202679	104	96
Q6ZUT1-2	Isoform 2 of Uncharacterized protein NKAPD1 OS=Homo sapiens OX=9606 GN=NKAPD1	0	8	2	2	293	-0.0935602	0.0197901	103.2	96.8
Q49A88	Coiled-coil domain-containing protein 14 OS=Homo sapiens OX=9606 GN=CCDC14 PE=1 SV=3	0	12	9	9	953	-0.0935602	0.0209419	104.3	95.7
Q14331	Protein FRG1 OS=Homo sapiens OX=9606 GN=FRG1 PE=1 SV=1	0	28	6	6	258	-0.0935602	0.0241145	103.4	96.6
P29372	DNA-3-methyladenine glycosylase OS=Homo sapiens OX=9606 GN=MPG PE=1 SV=3	0	42	8	8	298	-0.0935602	0.0226897	102.2	97.8
P17066	Heat shock 70 kDa protein 6 OS=Homo sapiens OX=9606 GN=HSPA6 PE=1 SV=2	0	16	8	1	643	-0.0935602	0.0173157	103.8	96.2
Q8N2G4-2	Isoform 2 of Ly6/PLAUR domain-containing protein 1 OS=Homo sapiens OX=9606 GN=LYPD1	0.001	7	1	1	164	-0.0922074	0.0152249	101.8	98.2
Q9H1D9	DNA-directed RNA polymerase III subunit RPC6 OS=Homo sapiens OX=9606 GN=POLR3F PE=1 SV=1	0	11	3	3	316	-0.0908534	0.0197128	99.8	100.2
Q9Y394	Dehydrogenase/reductase SDR family member 7 OS=Homo sapiens OX=9606 GN=DHRS7 PE=1 SV=1	0	12	3	3	339	-0.0894982	0.0180482	100.3	99.7
Q6ZN55	Zinc finger protein 574 OS=Homo sapiens OX=9606 GN=ZNF574 PE=1 SV=2	0	12	7	7	896	-0.0894982	0.0226897	108	92
P78356	Phosphatidylinositol 5-phosphate 4-kinase type-2 beta OS=Homo sapiens OX=9606 GN=PIP4K2B PE=1 SV=1	0	13	4	2	416	-0.0894982	0.0169737	101.1	98.9
P48723	Heat shock 70 kDa protein 13 OS=Homo sapiens OX=9606 GN=HSPA13 PE=1 SV=1	0	13	5	5	471	-0.0894982	0.0212744	102.6	97.4
P35052	Glypican-1 OS=Homo sapiens OX=9606 GN=GPC1 PE=1 SV=2	0.003	5	2	2	558	-0.0894982	0.0150261	98.9	101.1
A1L0T0	Acetolactate synthase-like protein OS=Homo sapiens OX=9606 GN=ILVBL PE=1 SV=2	0	15	5	5	632	-0.0881416	0.0176771	103.2	96.8
A0A286YF11	Calcium uptake protein 1, mitochondrial OS=Homo sapiens OX=9606 GN=MICU1 PE=1 SV=1	0	25	9	9	482	-0.0881416	0.0241145	105.5	94.5
Q9P2E5	Chondroitin sulfate glucuronyltransferase OS=Homo sapiens OX=9606 GN=CHPF2 PE=2 SV=2	0	31	17	17	772	-0.0867838	0.0226897	101.1	98.9
Q12872-2	Isoform 2 of Splicing factor, suppressor of white-apricot homolog OS=Homo sapiens OX=9606 GN=SFSWAP	0	24	19	19	1003	-0.0867838	0.0173157	104.1	95.9
P23284	Peptidyl-prolyl cis-trans isomerase B OS=Homo sapiens OX=9606 GN=PPIB PE=1 SV=2	0	46	9	9	216	-0.0867838	0.0173157	100.6	99.4
Q9UL54	Serine/threonine-protein kinase TAO2 OS=Homo sapiens OX=9606 GN=TAOK2 PE=1 SV=2	0	17	16	5	1235	-0.0854247	0.0226897	102	98
Q8N8D1	Programmed cell death protein 7 OS=Homo sapiens OX=9606 GN=PDCD7 PE=1 SV=1	0	34	10	10	485	-0.0854247	0.0226897	102.7	97.3
Q14696	LRP chaperone MESD OS=Homo sapiens OX=9606 GN=MESD PE=1 SV=2	0	23	5	5	234	-0.0854247	0.0170926	96.1	103.9
P53621-2	Isoform 2 of Coatomer subunit alpha OS=Homo sapiens OX=9606 GN=COPA	0	39	35	35	1233	-0.0854247	0.0173157	102.6	97.4
O75718	Cartilage-associated protein OS=Homo sapiens OX=9606 GN=CRTAP PE=1 SV=1	0	37	14	14	401	-0.0854247	0.0171506	104.7	95.3
Q96F07-2	Isoform 2 of Cytoplasmic FMR1-interacting protein 2 OS=Homo sapiens OX=9606 GN=CYFIP2	0	13	13	5	1253	-0.0840643	0.0202679	102.6	97.4
Q16394	Exostosin-1 OS=Homo sapiens OX=9606 GN=EXT1 PE=1 SV=2	0	7	3	3	746	-0.0840643	0.0173157	102.7	97.3
P61009	Signal peptidase complex subunit 3 OS=Homo sapiens OX=9606 GN=SPCS3 PE=1 SV=1	0	13	2	2	180	-0.0840643	0.0167346	101.5	98.5
P52732	Kinesin-like protein KIF11 OS=Homo sapiens OX=9606 GN=KIF11 PE=1 SV=2	0	13	12	12	1056	-0.0840643	0.0219724	105.2	94.8
P35998	26S proteasome regulatory subunit 7 OS=Homo sapiens OX=9606 GN=PSMC2 PE=1 SV=3	0	7	2	2	433	-0.0840643	0.0151589	94.3	105.7
Q9ULD5	Zinc finger protein 777 OS=Homo sapiens OX=9606 GN=ZNF777 PE=1 SV=3	0	7	4	3	831	-0.0827026	0.0153482	105.2	94.8
Q96SB4-3	Isoform 1 of SRSF protein kinase 1 OS=Homo sapiens OX=9606 GN=SRPK1	0	24	13	11	826	-0.0827026	0.016564	102.6	97.4
Q12857-4	Isoform 4 of Nuclear factor 1 A-type OS=Homo sapiens OX=9606 GN=NFIA	0	18	6	4	554	-0.0827026	0.0202679	94	106
P51153	Ras-related protein Rab-13 OS=Homo sapiens OX=9606 GN=RAB13 PE=1 SV=1	0	12	2	1	203	-0.0827026	0.0153482	99.8	100.2
P21359	Neurofibromin OS=Homo sapiens OX=9606 GN=NF1 PE=1 SV=2	0	7	14	14	2839	-0.0827026	0.0197901	105.6	94.4
P17098	Zinc finger protein 8 OS=Homo sapiens OX=9606 GN=ZNF8 PE=1 SV=2	0	20	8	8	575	-0.0827026	0.0202679	104.4	95.6
O75616	GTPase Era, mitochondrial OS=Homo sapiens OX=9606 GN=ERAL1 PE=1 SV=2	0	16	5	5	437	-0.0827026	0.0173157	101.4	98.6
O60313-2	Isoform 2 of Dynamin-like 120 kDa protein, mitochondrial OS=Homo sapiens OX=9606 GN=OPA1	0	14	10	10	997	-0.0827026	0.0162765	101.3	98.7
A0A0C4DFN5	Chromosome 10 open reading frame 61 OS=Homo sapiens OX=9606 GN=TCTN3 PE=1 SV=1	0	10	4	4	625	-0.0827026	0.0214915	102.6	97.4
Q9UQB8	Brain-specific angiogenesis inhibitor 1-associated protein 2 OS=Homo sapiens OX=9606 GN=BAIAP2 PE=1 SV=1	0	33	14	14	552	-0.0813396	0.0197901	99.6	100.4
Q9BTC0	Death-inducer obliterator 1 OS=Homo sapiens OX=9606 GN=DIDO1 PE=1 SV=5	0	35	45	44	2240	-0.0813396	0.0162765	99.9	100.1
Q03111	Protein ENL OS=Homo sapiens OX=9606 GN=MLLT1 PE=1 SV=2	0	13	5	5	559	-0.0813396	0.0197901	98.9	101.1
P17987	T-complex protein 1 subunit alpha OS=Homo sapiens OX=9606 GN=TCP1 PE=1 SV=1	0	36	15	15	556	-0.0813396	0.0226897	102.3	97.7
Q9NXS2	Glutaminyl-peptide cyclotransferase-like protein OS=Homo sapiens OX=9606 GN=QPCTL PE=1 SV=2	0	25	6	6	382	-0.0799754	0.0200009	104.4	95.6
Q9NU53	Glycoprotein integral membrane protein 1 OS=Homo sapiens OX=9606 GN=GINM1 PE=2 SV=1	0	12	3	3	330	-0.0799754	0.0177372	92.9	107.1
Q9NPA8	Transcription and mRNA export factor ENY2 OS=Homo sapiens OX=9606 GN=ENY2 PE=1 SV=1	0	26	2	2	101	-0.0799754	0.0197128	103.3	96.7
Q8WVX9	Fatty acyl-CoA reductase 1 OS=Homo sapiens OX=9606 GN=FAR1 PE=1 SV=1	0	22	8	8	515	-0.0799754	0.0156419	105.3	94.7
Q7Z4H8	Protein O-glucosyltransferase 3 OS=Homo sapiens OX=9606 GN=POGLUT3 PE=1 SV=2	0	36	13	13	507	-0.0799754	0.0222902	100.5	99.5
Q6IEG0	U11/U12 small nuclear ribonucleoprotein 48 kDa protein OS=Homo sapiens OX=9606 GN=SNRNP48 PE=1 SV=2	0	22	6	6	339	-0.0799754	0.0202679	99.7	100.3
Q53HL2	Borealin OS=Homo sapiens OX=9606 GN=CDCA8 PE=1 SV=2	0	9	2	2	280	-0.0799754	0.0173157	100.6	99.4
Q15375	Ephrin type-A receptor 7 OS=Homo sapiens OX=9606 GN=EPHA7 PE=1 SV=3	0	8	6	5	998	-0.0799754	0.0173157	111.7	88.3
Q07021	Complement component 1 Q subcomponent-binding protein, mitochondrial OS=Homo sapiens OX=9606 GN=C1QBP PE=1 SV=1	0	32	6	6	282	-0.0799754	0.0226897	96.9	103.1
O75396	Vesicle-trafficking protein SEC22b OS=Homo sapiens OX=9606 GN=SEC22B PE=1 SV=4	0	21	3	3	215	-0.0799754	0.0202679	101.6	98.4
O14657	Torsin-1B OS=Homo sapiens OX=9606 GN=TOR1B PE=1 SV=2	0	13	3	3	336	-0.0799754	0.0151589	97.6	102.4
Q9Y219	Protein jagged-2 OS=Homo sapiens OX=9606 GN=JAG2 PE=1 SV=3	0	9	7	7	1238	-0.0786098	0.0173157	105.4	94.6
P78362-2	Isoform 2 of SRSF protein kinase 2 OS=Homo sapiens OX=9606 GN=SRPK2	0	14	7	5	699	-0.0786098	0.0197901	97.3	102.7
C9JVC9	Voltage-dependent calcium channel subunit alpha-2/delta-2 OS=Homo sapiens OX=9606 GN=CACNA2D2 PE=1 SV=1	0	5	5	4	1153	-0.0786098	0.0176771	101.8	98.2
Q9NZV5	Selenoprotein N OS=Homo sapiens OX=9606 GN=SELENON PE=1 SV=5	0	18	7	7	590	-0.077243	0.0226897	104.5	95.5
Q9NRB3	Carbohydrate sulfotransferase 12 OS=Homo sapiens OX=9606 GN=CHST12 PE=2 SV=2	0	13	4	4	414	-0.077243	0.0151589	101.5	98.5
Q9NR30	Nucleolar RNA helicase 2 OS=Homo sapiens OX=9606 GN=DDX21 PE=1 SV=5	0	46	30	28	783	-0.077243	0.0154634	104.6	95.4
Q9NQV6-6	Isoform 6 of PR domain zinc finger protein 10 OS=Homo sapiens OX=9606 GN=PRDM10	0	6	6	6	1214	-0.077243	0.0165947	109	91
Q8NFW8	N-acylneuraminate cytidylyltransferase OS=Homo sapiens OX=9606 GN=CMAS PE=1 SV=2	0	42	16	16	434	-0.077243	0.0156352	102.7	97.3
Q7L2K0	Tubulin epsilon and delta complex protein 2 OS=Homo sapiens OX=9606 GN=TEDC2 PE=1 SV=1	0	9	3	3	433	-0.077243	0.0104655	107	93
P21333	Filamin-A OS=Homo sapiens OX=9606 GN=FLNA PE=1 SV=4	0	15	27	24	2647	-0.077243	0.0197901	100.1	99.9
Q9UGP8	Translocation protein SEC63 homolog OS=Homo sapiens OX=9606 GN=SEC63 PE=1 SV=2	0	37	21	21	760	-0.0758749	0.0153482	102.9	97.1
Q96A33	Coiled-coil domain-containing protein 47 OS=Homo sapiens OX=9606 GN=CCDC47 PE=1 SV=1	0	34	13	13	483	-0.0758749	0.0153482	103.2	96.8
Q495W5	Alpha-(1,3)-fucosyltransferase 11 OS=Homo sapiens OX=9606 GN=FUT11 PE=1 SV=1	0	12	3	3	492	-0.0758749	0.0170895	101.9	98.1
Q14703	Membrane-bound transcription factor site-1 protease OS=Homo sapiens OX=9606 GN=MBTPS1 PE=1 SV=1	0	10	8	8	1052	-0.0758749	0.0173157	114.6	85.4
Q14680	Maternal embryonic leucine zipper kinase OS=Homo sapiens OX=9606 GN=MELK PE=1 SV=3	0	10	4	4	651	-0.0758749	0.0162398	88	112
Q14671	Pumilio homolog 1 OS=Homo sapiens OX=9606 GN=PUM1 PE=1 SV=3	0	9	9	1	1186	-0.0758749	0.0111296	102.6	97.4
P62753	40S ribosomal protein S6 OS=Homo sapiens OX=9606 GN=RPS6 PE=1 SV=1	0	16	3	3	249	-0.0758749	0.0153482	101.4	98.6
O60884	DnaJ homolog subfamily A member 2 OS=Homo sapiens OX=9606 GN=DNAJA2 PE=1 SV=1	0	28	6	6	412	-0.0758749	0.0197901	124.6	75.4
A0A1B0GW05	Probable C-mannosyltransferase DPY19L1 OS=Homo sapiens OX=9606 GN=DPY19L1 PE=1 SV=1	0	6	4	4	748	-0.0758749	0.0153056	104.2	95.8
Q9BVJ6	U3 small nucleolar RNA-associated protein 14 homolog A OS=Homo sapiens OX=9606 GN=UTP14A PE=1 SV=1	0	33	20	20	771	-0.0745054	0.0173157	101.6	98.4
Q8NDD1-5	Isoform 2 of Uncharacterized protein C1orf131 OS=Homo sapiens OX=9606 GN=C1orf131	0	29	6	6	294	-0.0745054	0.0154634	94.4	105.6
Q12830	Nucleosome-remodeling factor subunit BPTF OS=Homo sapiens OX=9606 GN=BPTF PE=1 SV=3	0	15	34	1	3046	-0.0745054	0.0153482	97.8	102.2
P23229	Integrin alpha-6 OS=Homo sapiens OX=9606 GN=ITGA6 PE=1 SV=5	0	10	8	8	1130	-0.0745054	0.0152249	112.8	87.2
O14975	Very long-chain acyl-CoA synthetase OS=Homo sapiens OX=9606 GN=SLC27A2 PE=1 SV=2	0	13	6	6	620	-0.0745054	0.0171506	101.9	98.1
O00443	Phosphatidylinositol 4-phosphate 3-kinase C2 domain-containing subunit alpha OS=Homo sapiens OX=9606 GN=PIK3C2A PE=1 SV=2	0	8	10	10	1686	-0.0745054	0.0173157	105.7	94.3
A0A286YEX4	Nuclear factor 1 OS=Homo sapiens OX=9606 GN=NFIC PE=1 SV=1	0	15	5	4	530	-0.0745054	0.0197901	102.4	97.6
Q9NYY8	FAST kinase domain-containing protein 2, mitochondrial OS=Homo sapiens OX=9606 GN=FASTKD2 PE=1 SV=1	0	8	4	4	710	-0.0731347	0.0139613	106.4	93.6
Q9H8G2	Caspase activity and apoptosis inhibitor 1 OS=Homo sapiens OX=9606 GN=CAAP1 PE=1 SV=2	0	32	8	8	361	-0.0731347	0.0197901	97.4	102.6
Q99720	Sigma non-opioid intracellular receptor 1 OS=Homo sapiens OX=9606 GN=SIGMAR1 PE=1 SV=1	0	9	2	2	223	-0.0731347	0.0162765	106.1	93.9
Q8N5G2	Macoilin OS=Homo sapiens OX=9606 GN=MACO1 PE=1 SV=1	0	16	6	6	664	-0.0731347	0.0173157	99.6	100.4
Q1ED39	Lysine-rich nucleolar protein 1 OS=Homo sapiens OX=9606 GN=KNOP1 PE=1 SV=1	0	21	7	7	458	-0.0731347	0.0173157	104.3	95.7
P36897	TGF-beta receptor type-1 OS=Homo sapiens OX=9606 GN=TGFBR1 PE=1 SV=1	0	9	3	3	503	-0.0731347	0.0156184	101.6	98.4
Q9NTW7	Zinc finger protein 64 OS=Homo sapiens OX=9606 GN=ZFP64 PE=1 SV=3	0	6	3	3	645	-0.0717627	0.0151589	102.5	97.5
Q8WVM0	Dimethyladenosine transferase 1, mitochondrial OS=Homo sapiens OX=9606 GN=TFB1M PE=1 SV=1	0	32	9	9	346	-0.0703893	0.0176771	96.4	103.6
O76021	Ribosomal L1 domain-containing protein 1 OS=Homo sapiens OX=9606 GN=RSL1D1 PE=1 SV=3	0	28	11	11	490	-0.0703893	0.0151589	103.1	96.9
A9Z1X7	Serine/arginine repetitive matrix protein 1 OS=Homo sapiens OX=9606 GN=SRRM1 PE=1 SV=1	0	16	12	12	913	-0.0703893	0.0151589	101.2	98.8
	BiP-V5-TurboID	0	72	26	26	388	-0.0703893	0.0151589	101	99
X6R3N0	Solute carrier family 27 (Fatty acid transporter), member 3, isoform CRA_d OS=Homo sapiens OX=9606 GN=SLC27A3 PE=1 SV=1	0	15	6	6	811	-0.0690147	0.0153482	107.4	92.6
Q9NPI1	Bromodomain-containing protein 7 OS=Homo sapiens OX=9606 GN=BRD7 PE=1 SV=1	0	39	15	15	651	-0.0690147	0.0173157	103.1	96.9
Q9BQ75	Protein CMSS1 OS=Homo sapiens OX=9606 GN=CMSS1 PE=1 SV=2	0	21	5	5	279	-0.0690147	0.0173157	102.8	97.2
P68371	Tubulin beta-4B chain OS=Homo sapiens OX=9606 GN=TUBB4B PE=1 SV=1	0	62	17	4	445	-0.0690147	0.0151589	101.8	98.2
P51149	Ras-related protein Rab-7a OS=Homo sapiens OX=9606 GN=RAB7A PE=1 SV=1	0	49	8	8	207	-0.0690147	0.0156184	94.2	105.8
P42345	Serine/threonine-protein kinase mTOR OS=Homo sapiens OX=9606 GN=MTOR PE=1 SV=1	0	6	12	11	2549	-0.0690147	0.0150716	102.7	97.3
P38646	Stress-70 protein, mitochondrial OS=Homo sapiens OX=9606 GN=HSPA9 PE=1 SV=2	0	35	18	18	679	-0.0690147	0.0151589	102.1	97.9
A0A140T9H5	HLA class I histocompatibility antigen, C alpha chain OS=Homo sapiens OX=9606 GN=HLA-C PE=1 SV=1	0	34	8	4	372	-0.0690147	0.0151589	100.9	99.1
Q9NY97	N-acetyllactosaminide beta-1,3-N-acetylglucosaminyltransferase 2 OS=Homo sapiens OX=9606 GN=B3GNT2 PE=1 SV=2	0	7	2	2	397	-0.0676387	0.00922386	103.4	96.6
Q9BZF3-5	Isoform 5 of Oxysterol-binding protein-related protein 6 OS=Homo sapiens OX=9606 GN=OSBPL6	0	15	10	9	959	-0.0676387	0.0167167	102.1	97.9
Q8WUU5	GATA zinc finger domain-containing protein 1 OS=Homo sapiens OX=9606 GN=GATAD1 PE=1 SV=1	0	16	3	3	269	-0.0676387	0.0145986	83.7	116.3
P12755	Ski oncogene OS=Homo sapiens OX=9606 GN=SKI PE=1 SV=1	0	7	3	3	728	-0.0676387	0.0167346	97.1	102.9
P12270	Nucleoprotein TPR OS=Homo sapiens OX=9606 GN=TPR PE=1 SV=3	0	37	66	66	2363	-0.0676387	0.0150261	103.6	96.4
Q9NXR7-1	Isoform 1 of BRISC and BRCA1-A complex member 2 OS=Homo sapiens OX=9606 GN=BABAM2	0	11	4	4	415	-0.0662614	0.0167167	102.4	97.6
Q9H7Z3	Nuclear exosome regulator NRDE2 OS=Homo sapiens OX=9606 GN=NRDE2 PE=1 SV=3	0	32	28	28	1164	-0.0662614	0.0147255	102.6	97.4
Q99755	Phosphatidylinositol 4-phosphate 5-kinase type-1 alpha OS=Homo sapiens OX=9606 GN=PIP5K1A PE=1 SV=1	0	27	11	11	562	-0.0662614	0.0197901	103.9	96.1
Q6UWZ7	BRCA1-A complex subunit Abraxas 1 OS=Homo sapiens OX=9606 GN=ABRAXAS1 PE=1 SV=2	0	6	2	2	409	-0.0662614	0.0150261	102.4	97.6
Q6UWW8	Carboxylesterase 3 OS=Homo sapiens OX=9606 GN=CES3 PE=1 SV=1	0	15	5	5	571	-0.0662614	0.0156419	100.2	99.8
Q02809	Procollagen-lysine,2-oxoglutarate 5-dioxygenase 1 OS=Homo sapiens OX=9606 GN=PLOD1 PE=1 SV=2	0	45	24	24	727	-0.0662614	0.0150261	101.7	98.3
P52756	RNA-binding protein 5 OS=Homo sapiens OX=9606 GN=RBM5 PE=1 SV=2	0	19	12	12	815	-0.0662614	0.0171506	99.9	100.1
O75369-8	Isoform 8 of Filamin-B OS=Homo sapiens OX=9606 GN=FLNB	0	29	47	44	2633	-0.0662614	0.0150261	102.3	97.7
Q9NWU2	Glucose-induced degradation protein 8 homolog OS=Homo sapiens OX=9606 GN=GID8 PE=1 SV=1	0	14	2	2	228	-0.0648829	0.0104655	102.8	97.2
Q9H1J7	Protein Wnt-5b OS=Homo sapiens OX=9606 GN=WNT5B PE=2 SV=2	0	15	4	3	359	-0.0648829	0.0146862	98.6	101.4
Q96JA1	Leucine-rich repeats and immunoglobulin-like domains protein 1 OS=Homo sapiens OX=9606 GN=LRIG1 PE=1 SV=2	0	18	13	12	1093	-0.0648829	0.016564	103.3	96.7
Q02878	60S ribosomal protein L6 OS=Homo sapiens OX=9606 GN=RPL6 PE=1 SV=3	0	22	5	5	288	-0.0648829	0.0146862	100.3	99.7
P82663	28S ribosomal protein S25, mitochondrial OS=Homo sapiens OX=9606 GN=MRPS25 PE=1 SV=1	0	31	4	4	173	-0.0648829	0.0170758	101.5	98.5
P51648-2	Isoform 2 of Aldehyde dehydrogenase family 3 member A2 OS=Homo sapiens OX=9606 GN=ALDH3A2	0	23	9	9	508	-0.0648829	0.0197901	101.1	98.9
I3L0E3	HCG1984214, isoform CRA_a OS=Homo sapiens OX=9606 GN=hCG_1984214 PE=4 SV=1	0	20	4	3	225	-0.0648829	0.016521	101	99
H0Y993	DEK oncogene (DNA binding), isoform CRA_b OS=Homo sapiens OX=9606 GN=DEK PE=1 SV=2	0	28	8	8	380	-0.0648829	0.0146862	102.3	97.7
F5H7W8	Chromosome 12 open reading frame 43 OS=Homo sapiens OX=9606 GN=C12orf43 PE=1 SV=2	0	21	3	3	293	-0.0648829	0.0154634	105.5	94.5
Q9Y2X3	Nucleolar protein 58 OS=Homo sapiens OX=9606 GN=NOP58 PE=1 SV=1	0	44	16	16	529	-0.0635029	0.0145986	99.9	100.1
Q9GZL7	Ribosome biogenesis protein WDR12 OS=Homo sapiens OX=9606 GN=WDR12 PE=1 SV=2	0	33	9	9	423	-0.0635029	0.01675	113.1	86.9
Q96EX3	WD repeat-containing protein 34 OS=Homo sapiens OX=9606 GN=WDR34 PE=1 SV=2	0	5	3	3	536	-0.0635029	0.0162722	101.9	98.1
Q93009	Ubiquitin carboxyl-terminal hydrolase 7 OS=Homo sapiens OX=9606 GN=USP7 PE=1 SV=2	0	37	32	32	1102	-0.0635029	0.0145756	102.5	97.5
Q8TF01	Arginine/serine-rich protein PNISR OS=Homo sapiens OX=9606 GN=PNISR PE=1 SV=2	0	14	8	8	805	-0.0635029	0.0142279	103.8	96.2
Q02040	A-kinase anchor protein 17A OS=Homo sapiens OX=9606 GN=AKAP17A PE=1 SV=2	0	23	13	13	695	-0.0635029	0.0142279	103.5	96.5
O75319	RNA/RNP complex-1-interacting phosphatase OS=Homo sapiens OX=9606 GN=DUSP11 PE=1 SV=2	0	16	4	4	377	-0.0635029	0.0131069	100.5	99.5
J3KNZ9	Probable fibrosin-1 OS=Homo sapiens OX=9606 GN=FBRS PE=1 SV=1	0	6	4	4	980	-0.0635029	0.0171506	108.3	91.7
Q9UBS4	DnaJ homolog subfamily B member 11 OS=Homo sapiens OX=9606 GN=DNAJB11 PE=1 SV=1	0	30	7	7	358	-0.0621217	0.0139785	102.2	97.8
Q9H147	Deoxynucleotidyltransferase terminal-interacting protein 1 OS=Homo sapiens OX=9606 GN=DNTTIP1 PE=1 SV=2	0	24	4	4	329	-0.0621217	0.0167099	104	96
Q8TEB9	Rhomboid-related protein 4 OS=Homo sapiens OX=9606 GN=RHBDD1 PE=1 SV=1	0	13	3	3	315	-0.0621217	0.0145316	101	99
Q15369	Elongin-C OS=Homo sapiens OX=9606 GN=ELOC PE=1 SV=1	0	41	3	3	112	-0.0621217	0.0170758	101.4	98.6
P32189	Glycerol kinase OS=Homo sapiens OX=9606 GN=GK PE=1 SV=3	0	43	18	18	559	-0.0621217	0.0139613	101	99
O15014	Zinc finger protein 609 OS=Homo sapiens OX=9606 GN=ZNF609 PE=1 SV=2	0	10	10	10	1411	-0.0621217	0.0164299	101.7	98.3
O00469-2	Isoform 2 of Procollagen-lysine,2-oxoglutarate 5-dioxygenase 2 OS=Homo sapiens OX=9606 GN=PLOD2	0	26	16	16	758	-0.0621217	0.0173157	94.2	105.8
Q9UJJ9	N-acetylglucosamine-1-phosphotransferase subunit gamma OS=Homo sapiens OX=9606 GN=GNPTG PE=1 SV=1	0	15	3	3	305	-0.0607392	0.0122711	104.8	95.2
Q9UHJ3	Scm-like with four MBT domains protein 1 OS=Homo sapiens OX=9606 GN=SFMBT1 PE=1 SV=2	0	18	12	11	866	-0.0607392	0.0162765	95.2	104.8
Q9NZR2	Low-density lipoprotein receptor-related protein 1B OS=Homo sapiens OX=9606 GN=LRP1B PE=1 SV=2	0	5	15	14	4599	-0.0607392	0.0168996	104.7	95.3
Q15776	Zinc finger protein with KRAB and SCAN domains 8 OS=Homo sapiens OX=9606 GN=ZKSCAN8 PE=1 SV=2	0	24	9	9	578	-0.0607392	0.0166536	101.1	98.9
Q9NZT1	Calmodulin-like protein 5 OS=Homo sapiens OX=9606 GN=CALML5 PE=1 SV=2	0	16	1	1	146	-0.0593553	0.00861078	102	98
P13984	General transcription factor IIF subunit 2 OS=Homo sapiens OX=9606 GN=GTF2F2 PE=1 SV=2	0	16	3	3	249	-0.0593553	0.0153482	101.6	98.4
Q9Y2A7-2	Isoform 2 of Nck-associated protein 1 OS=Homo sapiens OX=9606 GN=NCKAP1	0	7	6	6	1134	-0.0579701	0.0140272	101.5	98.5
Q9BVC6	Transmembrane protein 109 OS=Homo sapiens OX=9606 GN=TMEM109 PE=1 SV=1	0.001	5	1	1	243	-0.0579701	0.0104655	102	98
Q86TM6	E3 ubiquitin-protein ligase synoviolin OS=Homo sapiens OX=9606 GN=SYVN1 PE=1 SV=2	0	14	8	8	617	-0.0579701	0.0122711	101.4	98.6
Q5T9L3-2	Isoform 2 of Protein wntless homolog OS=Homo sapiens OX=9606 GN=WLS	0	11	5	5	543	-0.0579701	0.0156352	102.6	97.4
Q15014	Mortality factor 4-like protein 2 OS=Homo sapiens OX=9606 GN=MORF4L2 PE=1 SV=1	0	31	7	5	288	-0.0579701	0.0167099	103.4	96.6
P0DPB6	DNA-directed RNA polymerases I and III subunit RPAC2 OS=Homo sapiens OX=9606 GN=POLR1D PE=1 SV=1	0	39	4	3	133	-0.0579701	0.0162398	99.3	100.7
J3KQY1	39S ribosomal protein L22, mitochondrial OS=Homo sapiens OX=9606 GN=MRPL22 PE=1 SV=1	0	28	5	5	232	-0.0579701	0.0164299	101.7	98.3
Q9UDW3	Zinc finger matrin-type protein 5 OS=Homo sapiens OX=9606 GN=ZMAT5 PE=1 SV=1	0	39	5	5	170	-0.0565835	0.0132957	104.8	95.2
Q96S94	Cyclin-L2 OS=Homo sapiens OX=9606 GN=CCNL2 PE=1 SV=1	0	33	14	13	520	-0.0565835	0.0120268	101	99
Q92820	Gamma-glutamyl hydrolase OS=Homo sapiens OX=9606 GN=GGH PE=1 SV=2	0	20	6	6	318	-0.0565835	0.0153482	95.3	104.7
Q6UW63	Protein O-glucosyltransferase 2 OS=Homo sapiens OX=9606 GN=POGLUT2 PE=1 SV=1	0	27	10	10	502	-0.0565835	0.0153482	100.7	99.3
Q10471	Polypeptide N-acetylgalactosaminyltransferase 2 OS=Homo sapiens OX=9606 GN=GALNT2 PE=1 SV=1	0	21	9	8	571	-0.0565835	0.0156352	100	100
P54760	Ephrin type-B receptor 4 OS=Homo sapiens OX=9606 GN=EPHB4 PE=1 SV=2	0	6	5	4	987	-0.0565835	0.0117654	95.5	104.5
P50454	Serpin H1 OS=Homo sapiens OX=9606 GN=SERPINH1 PE=1 SV=2	0	43	15	15	418	-0.0565835	0.0120268	99.2	100.8
Q6PKC3	Thioredoxin domain-containing protein 11 OS=Homo sapiens OX=9606 GN=TXNDC11 PE=1 SV=2	0	15	11	11	985	-0.0551957	0.0154634	104	96
O95104	SR-related and CTD-associated factor 4 OS=Homo sapiens OX=9606 GN=SCAF4 PE=1 SV=3	0	23	19	16	1147	-0.0551957	0.0117654	97.2	102.8
O76094	Signal recognition particle subunit SRP72 OS=Homo sapiens OX=9606 GN=SRP72 PE=1 SV=3	0	9	4	4	671	-0.0551957	0.00939662	102.1	97.9
O75197	Low-density lipoprotein receptor-related protein 5 OS=Homo sapiens OX=9606 GN=LRP5 PE=1 SV=2	0	9	10	7	1615	-0.0551957	0.0150716	99.2	100.8
A2VDJ0-5	Isoform 4 of Transmembrane protein 131-like OS=Homo sapiens OX=9606 GN=TMEM131L	0	9	13	13	1610	-0.0551957	0.0156391	114.4	85.6
Q96TC7	Regulator of microtubule dynamics protein 3 OS=Homo sapiens OX=9606 GN=RMDN3 PE=1 SV=2	0	10	3	3	470	-0.0538064	0.0110045	101.9	98.1
Q8IXB1-2	Isoform 2 of DnaJ homolog subfamily C member 10 OS=Homo sapiens OX=9606 GN=DNAJC10	0	30	14	1	747	-0.0538064	0.0104655	100.8	99.2
Q70UQ0	Inhibitor of nuclear factor kappa-B kinase-interacting protein OS=Homo sapiens OX=9606 GN=IKBIP PE=1 SV=1	0	32	11	9	350	-0.0538064	0.0111296	102.5	97.5
Q5NDL2	EGF domain-specific O-linked N-acetylglucosamine transferase OS=Homo sapiens OX=9606 GN=EOGT PE=1 SV=1	0	15	7	7	527	-0.0538064	0.012193	101.7	98.3
Q13505	Metaxin-1 OS=Homo sapiens OX=9606 GN=MTX1 PE=1 SV=3	0	12	4	4	466	-0.0538064	0.0108018	99.5	100.5
P78364	Polyhomeotic-like protein 1 OS=Homo sapiens OX=9606 GN=PHC1 PE=1 SV=3	0	7	3	3	1004	-0.0538064	0.0146862	101.3	98.7
B7ZM99	MTHFD1L protein OS=Homo sapiens OX=9606 GN=MTHFD1L PE=1 SV=1	0	5	4	4	979	-0.0538064	0.0127508	101.5	98.5
A0A087WT44	Heme oxygenase 2 OS=Homo sapiens OX=9606 GN=HMOX2 PE=1 SV=1	0	40	10	10	370	-0.0538064	0.0153482	100.4	99.6
Q9Y2G5	GDP-fucose protein O-fucosyltransferase 2 OS=Homo sapiens OX=9606 GN=POFUT2 PE=1 SV=3	0	25	9	9	429	-0.0524159	0.0151589	114.1	85.9
Q9BYD2	39S ribosomal protein L9, mitochondrial OS=Homo sapiens OX=9606 GN=MRPL9 PE=1 SV=2	0	25	5	5	267	-0.0524159	0.0146862	84.4	115.6
Q96T21	Selenocysteine insertion sequence-binding protein 2 OS=Homo sapiens OX=9606 GN=SECISBP2 PE=1 SV=2	0	10	6	6	854	-0.0524159	0.0108018	100.1	99.9
Q96T17-2	Isoform 2 of MAP7 domain-containing protein 2 OS=Homo sapiens OX=9606 GN=MAP7D2	0	10	6	6	773	-0.0524159	0.0131594	102	98
P62258	14-3-3 protein epsilon OS=Homo sapiens OX=9606 GN=YWHAE PE=1 SV=1	0	43	8	7	255	-0.0524159	0.0156352	103.1	96.9
O43795	Unconventional myosin-Ib OS=Homo sapiens OX=9606 GN=MYO1B PE=1 SV=3	0	20	18	18	1136	-0.0524159	0.0154634	94.9	105.1
Q9NVP1	ATP-dependent RNA helicase DDX18 OS=Homo sapiens OX=9606 GN=DDX18 PE=1 SV=2	0	23	11	11	670	-0.051024	0.0151589	98.7	101.3
Q8N138	ORM1-like protein 3 OS=Homo sapiens OX=9606 GN=ORMDL3 PE=1 SV=1	0.001	10	1	1	153	-0.051024	0.0104655	101.7	98.3
P35221-2	Isoform 2 of Catenin alpha-1 OS=Homo sapiens OX=9606 GN=CTNNA1	0	27	17	17	930	-0.051024	0.0152249	104.5	95.5
O15379-2	Isoform 2 of Histone deacetylase 3 OS=Homo sapiens OX=9606 GN=HDAC3	0	12	4	4	429	-0.051024	0.0117654	102	98
O15230	Laminin subunit alpha-5 OS=Homo sapiens OX=9606 GN=LAMA5 PE=1 SV=8	0	13	34	33	3695	-0.051024	0.0162765	100.7	99.3
A0A0A0MSV9	Tapasin OS=Homo sapiens OX=9606 GN=TAPBP PE=1 SV=1	0	6	3	3	504	-0.051024	0.0151589	101.1	98.9
Q9Y2G8	DnaJ homolog subfamily C member 16 OS=Homo sapiens OX=9606 GN=DNAJC16 PE=2 SV=3	0	25	14	14	782	-0.0496308	0.0153482	95.5	104.5
P78536	Disintegrin and metalloproteinase domain-containing protein 17 OS=Homo sapiens OX=9606 GN=ADAM17 PE=1 SV=1	0	22	13	13	824	-0.0496308	0.0151589	99.5	100.5
O95071	E3 ubiquitin-protein ligase UBR5 OS=Homo sapiens OX=9606 GN=UBR5 PE=1 SV=2	0	12	27	27	2799	-0.0496308	0.0153482	101.1	98.9
C9JME2	FERM, ARHGEF and pleckstrin domain-containing protein 1 OS=Homo sapiens OX=9606 GN=FARP1 PE=1 SV=2	0	8	7	6	1076	-0.0496308	0.0140087	109.4	90.6
A0A0C4DFL7	Lanosterol 14-alpha demethylase OS=Homo sapiens OX=9606 GN=CYP51A1 PE=1 SV=1	0	5	2	2	509	-0.0496308	0.0122711	103.1	96.9
Q9NRA1	Platelet-derived growth factor C OS=Homo sapiens OX=9606 GN=PDGFC PE=1 SV=2	0	14	4	4	345	-0.0468403	0.00762274	99.9	100.1
Q86Y46	Keratin, type II cytoskeletal 73 OS=Homo sapiens OX=9606 GN=KRT73 PE=1 SV=1	0	6	3	1	540	-0.0468403	0.0151589	101.3	98.7
Q6P1X5	Transcription initiation factor TFIID subunit 2 OS=Homo sapiens OX=9606 GN=TAF2 PE=1 SV=3	0	25	21	21	1199	-0.0468403	0.0104655	105.5	94.5
P40937	Replication factor C subunit 5 OS=Homo sapiens OX=9606 GN=RFC5 PE=1 SV=1	0	43	12	12	340	-0.0468403	0.0104655	101	99
O43815	Striatin OS=Homo sapiens OX=9606 GN=STRN PE=1 SV=4	0	13	7	6	780	-0.0468403	0.0108018	98.6	101.4
O43505	Beta-1,4-glucuronyltransferase 1 OS=Homo sapiens OX=9606 GN=B4GAT1 PE=1 SV=1	0	23	5	5	415	-0.0468403	0.0146862	103.2	96.8
B3KW44	Methyltransferase-like protein OS=Homo sapiens OX=9606 GN=METTL8 PE=1 SV=1	0	13	5	5	407	-0.0468403	0.0121783	97.7	102.3
A0A087WYL7	Mediator of RNA polymerase II transcription subunit 6 OS=Homo sapiens OX=9606 GN=MED6 PE=1 SV=1	0	30	6	6	257	-0.0468403	0.0153482	95.1	104.9
Q9HD33	39S ribosomal protein L47, mitochondrial OS=Homo sapiens OX=9606 GN=MRPL47 PE=1 SV=2	0	17	4	4	250	-0.045443	0.0156352	105.1	94.9
Q15475	Homeobox protein SIX1 OS=Homo sapiens OX=9606 GN=SIX1 PE=1 SV=1	0	15	3	3	284	-0.045443	0.0111296	104.8	95.2
Q00403	Transcription initiation factor IIB OS=Homo sapiens OX=9606 GN=GTF2B PE=1 SV=1	0	30	7	7	316	-0.045443	0.0150261	100	100
P26368	Splicing factor U2AF 65 kDa subunit OS=Homo sapiens OX=9606 GN=U2AF2 PE=1 SV=4	0	42	11	11	475	-0.045443	0.0104655	101.5	98.5
O15260	Surfeit locus protein 4 OS=Homo sapiens OX=9606 GN=SURF4 PE=1 SV=3	0	12	3	3	269	-0.045443	0.0122046	100	100
Q9P2B2	Prostaglandin F2 receptor negative regulator OS=Homo sapiens OX=9606 GN=PTGFRN PE=1 SV=2	0	5	4	4	879	-0.0440443	0.00881901	98.1	101.9
Q9NWK9	Box C/D snoRNA protein 1 OS=Homo sapiens OX=9606 GN=ZNHIT6 PE=1 SV=1	0	34	13	13	470	-0.0440443	0.0152249	102.3	97.7
Q96G23	Ceramide synthase 2 OS=Homo sapiens OX=9606 GN=CERS2 PE=1 SV=1	0	7	2	2	380	-0.0440443	0.00861078	99.5	100.5
Q6UW68	Transmembrane protein 205 OS=Homo sapiens OX=9606 GN=TMEM205 PE=1 SV=1	0	9	1	1	189	-0.0440443	0.0111296	100.7	99.3
Q9UNW1	Multiple inositol polyphosphate phosphatase 1 OS=Homo sapiens OX=9606 GN=MINPP1 PE=1 SV=1	0	6	2	2	487	-0.0426443	0.00681627	100.4	99.6
Q9NW08	DNA-directed RNA polymerase III subunit RPC2 OS=Homo sapiens OX=9606 GN=POLR3B PE=1 SV=2	0	5	5	5	1133	-0.0426443	0.00526822	100.5	99.5
Q9H5Q4	Dimethyladenosine transferase 2, mitochondrial OS=Homo sapiens OX=9606 GN=TFB2M PE=1 SV=1	0	11	4	4	396	-0.0426443	0.010185	101.5	98.5
Q01081	Splicing factor U2AF 35 kDa subunit OS=Homo sapiens OX=9606 GN=U2AF1 PE=1 SV=3	0	53	9	2	240	-0.0426443	0.00861078	100.6	99.4
P82933	28S ribosomal protein S9, mitochondrial OS=Homo sapiens OX=9606 GN=MRPS9 PE=1 SV=2	0	31	9	9	396	-0.0426443	0.0140875	110.5	89.5
P48643	T-complex protein 1 subunit epsilon OS=Homo sapiens OX=9606 GN=CCT5 PE=1 SV=1	0	41	14	13	541	-0.0426443	0.0146862	101	99
O60573	Eukaryotic translation initiation factor 4E type 2 OS=Homo sapiens OX=9606 GN=EIF4E2 PE=1 SV=1	0	29	5	5	245	-0.0426443	0.0146862	98.9	101.1
Q8WYQ5	Microprocessor complex subunit DGCR8 OS=Homo sapiens OX=9606 GN=DGCR8 PE=1 SV=1	0	18	10	10	773	-0.041243	0.0126165	99.7	100.3
Q8TBM8	DnaJ homolog subfamily B member 14 OS=Homo sapiens OX=9606 GN=DNAJB14 PE=1 SV=1	0	9	3	3	379	-0.041243	0.00735236	101.4	98.6
Q86U38	Nucleolar protein 9 OS=Homo sapiens OX=9606 GN=NOP9 PE=1 SV=1	0	35	13	13	636	-0.041243	0.0146862	100.5	99.5
Q06481-4	Isoform 4 of Amyloid-like protein 2 OS=Homo sapiens OX=9606 GN=APLP2	0	25	10	1	695	-0.041243	0.00735236	106.4	93.6
O75376	Nuclear receptor corepressor 1 OS=Homo sapiens OX=9606 GN=NCOR1 PE=1 SV=2	0	10	17	17	2440	-0.041243	0.0139613	91	109
P29317	Ephrin type-A receptor 2 OS=Homo sapiens OX=9606 GN=EPHA2 PE=1 SV=2	0	9	7	6	976	-0.0398403	0.0131069	100.5	99.5
O95684	FGFR1 oncogene partner OS=Homo sapiens OX=9606 GN=FGFR1OP PE=1 SV=1	0	30	8	8	399	-0.0398403	0.0145986	99	101
Q68CR1	Protein sel-1 homolog 3 OS=Homo sapiens OX=9606 GN=SEL1L3 PE=1 SV=2	0	11	8	8	1132	-0.0384362	0.00861078	100.4	99.6
P06756	Integrin alpha-V OS=Homo sapiens OX=9606 GN=ITGAV PE=1 SV=2	0	24	19	19	1048	-0.0384362	0.0151589	100.7	99.3
A0A087WZ62	Mannosyltransferase OS=Homo sapiens OX=9606 PE=3 SV=1	0	5	3	3	844	-0.0384362	0.00735236	100.8	99.2
Q15637-5	Isoform 5 of Splicing factor 1 OS=Homo sapiens OX=9606 GN=SF1	0	19	7	1	673	-0.0370307	0.00524004	102	98
O95900	Mitochondrial mRNA pseudouridine synthase TRUB2 OS=Homo sapiens OX=9606 GN=TRUB2 PE=1 SV=1	0	8	2	2	331	-0.0370307	0.00771782	101.3	98.7
Q9UKV5	E3 ubiquitin-protein ligase AMFR OS=Homo sapiens OX=9606 GN=AMFR PE=1 SV=2	0	15	5	5	643	-0.0356239	0.0111296	106.2	93.8
Q96DT7	Zinc finger and BTB domain-containing protein 10 OS=Homo sapiens OX=9606 GN=ZBTB10 PE=1 SV=2	0	28	16	16	871	-0.0356239	0.0142279	97.7	102.3
Q8N1G4	Leucine-rich repeat-containing protein 47 OS=Homo sapiens OX=9606 GN=LRRC47 PE=1 SV=1	0	8	3	3	583	-0.0356239	0.00545201	101.3	98.7
Q8IZH2	5'-3' exoribonuclease 1 OS=Homo sapiens OX=9606 GN=XRN1 PE=1 SV=1	0	18	24	24	1706	-0.0356239	0.0129487	99.7	100.3
Q6P158	Putative ATP-dependent RNA helicase DHX57 OS=Homo sapiens OX=9606 GN=DHX57 PE=1 SV=2	0	22	24	24	1386	-0.0356239	0.0122711	101.4	98.6
Q6NZI2	Caveolae-associated protein 1 OS=Homo sapiens OX=9606 GN=CAVIN1 PE=1 SV=1	0	21	6	6	390	-0.0356239	0.0134626	96.3	103.7
Q5HYJ3	Protein FAM76B OS=Homo sapiens OX=9606 GN=FAM76B PE=1 SV=3	0	12	3	3	339	-0.0356239	0.00861078	103.8	96.2
Q14241	Elongin-A OS=Homo sapiens OX=9606 GN=ELOA PE=1 SV=2	0	18	9	9	798	-0.0356239	0.0116737	107.7	92.3
O00311	Cell division cycle 7-related protein kinase OS=Homo sapiens OX=9606 GN=CDC7 PE=1 SV=1	0	12	6	6	574	-0.0356239	0.00856679	99.3	100.7
J3KN66	Torsin-1A-interacting protein 1 OS=Homo sapiens OX=9606 GN=TOR1AIP1 PE=1 SV=1	0	12	5	5	599	-0.0356239	0.0104655	101.3	98.7
A0A0A0MQS9	Laminin subunit alpha-4 OS=Homo sapiens OX=9606 GN=LAMA4 PE=1 SV=1	0	7	8	8	1823	-0.0356239	0.00681627	91.8	108.2
Q9H7N4	Splicing factor, arginine/serine-rich 19 OS=Homo sapiens OX=9606 GN=SCAF1 PE=1 SV=3	0	19	16	16	1312	-0.0342157	0.00681627	104	96
Q9H0S4	Probable ATP-dependent RNA helicase DDX47 OS=Homo sapiens OX=9606 GN=DDX47 PE=1 SV=1	0	40	14	14	455	-0.0342157	0.00681627	97.9	102.1
Q99943	1-acyl-sn-glycerol-3-phosphate acyltransferase alpha OS=Homo sapiens OX=9606 GN=AGPAT1 PE=1 SV=2	0	21	4	4	283	-0.0342157	0.0122711	102.3	97.7
Q96SB3	Neurabin-2 OS=Homo sapiens OX=9606 GN=PPP1R9B PE=1 SV=3	0	10	5	5	817	-0.0342157	0.0104655	99.1	100.9
P55268	Laminin subunit beta-2 OS=Homo sapiens OX=9606 GN=LAMB2 PE=1 SV=2	0	17	20	20	1798	-0.0342157	0.0120268	101.3	98.7
P04264	Keratin, type II cytoskeletal 1 OS=Homo sapiens OX=9606 GN=KRT1 PE=1 SV=6	0	48	25	21	644	-0.0342157	0.00681627	103.1	96.9
O00159	Unconventional myosin-Ic OS=Homo sapiens OX=9606 GN=MYO1C PE=1 SV=4	0	21	16	16	1063	-0.0342157	0.0117654	102.5	97.5
O00139-4	Isoform 4 of Kinesin-like protein KIF2A OS=Homo sapiens OX=9606 GN=KIF2A	0	41	21	21	744	-0.0342157	0.00681627	107.6	92.4
Q86XL3	Ankyrin repeat and LEM domain-containing protein 2 OS=Homo sapiens OX=9606 GN=ANKLE2 PE=1 SV=4	0	15	9	9	938	-0.0328061	0.00735236	100.1	99.9
Q5VT06	Centrosome-associated protein 350 OS=Homo sapiens OX=9606 GN=CEP350 PE=1 SV=1	0	18	37	37	3117	-0.0328061	0.0111296	100.2	99.8
Q8IZP0	Abl interactor 1 OS=Homo sapiens OX=9606 GN=ABI1 PE=1 SV=4	0	10	3	3	508	-0.0313952	0.00681627	74.7	125.3
Q5VUA4	Zinc finger protein 318 OS=Homo sapiens OX=9606 GN=ZNF318 PE=1 SV=2	0	27	39	39	2279	-0.0313952	0.00681627	98.2	101.8
Q14165	Malectin OS=Homo sapiens OX=9606 GN=MLEC PE=1 SV=1	0	38	8	8	292	-0.0313952	0.0126165	93.4	106.6
Q14004	Cyclin-dependent kinase 13 OS=Homo sapiens OX=9606 GN=CDK13 PE=1 SV=2	0	33	36	28	1512	-0.0313952	0.00681627	100.1	99.9
Q13405	39S ribosomal protein L49, mitochondrial OS=Homo sapiens OX=9606 GN=MRPL49 PE=1 SV=1	0.008	6	1	1	166	-0.0313952	0.00681627	101.1	98.9
P22629	Streptavidin OS=Streptomyces avidinii PE=1 SV=1	0	43	9	9	183	-0.0313952	0.00681627	103.7	96.3
O94887	FERM, ARHGEF and pleckstrin domain-containing protein 2 OS=Homo sapiens OX=9606 GN=FARP2 PE=1 SV=3	0	13	10	6	1054	-0.0313952	0.0108018	101.4	98.6
Q96KA5	Cleft lip and palate transmembrane protein 1-like protein OS=Homo sapiens OX=9606 GN=CLPTM1L PE=1 SV=1	0	17	6	6	538	-0.0299829	0.0108018	101.2	98.8
Q8NAV1	Pre-mRNA-splicing factor 38A OS=Homo sapiens OX=9606 GN=PRPF38A PE=1 SV=1	0	53	13	13	312	-0.0299829	0.00681627	107.4	92.6
Q75T13	GPI inositol-deacylase OS=Homo sapiens OX=9606 GN=PGAP1 PE=1 SV=1	0	11	8	8	922	-0.0299829	0.0109568	101	99
Q6NUM9	All-trans-retinol 13,14-reductase OS=Homo sapiens OX=9606 GN=RETSAT PE=1 SV=2	0	10	4	4	610	-0.0299829	0.00685421	102.9	97.1
P14625	Endoplasmin OS=Homo sapiens OX=9606 GN=HSP90B1 PE=1 SV=1	0	55	41	39	803	-0.0299829	0.00681627	101.6	98.4
P07437	Tubulin beta chain OS=Homo sapiens OX=9606 GN=TUBB PE=1 SV=2	0	63	17	4	444	-0.0299829	0.0104655	104.6	95.4
A0A3B3ISF9	Endothelin-converting enzyme 1 OS=Homo sapiens OX=9606 GN=ECE1 PE=1 SV=1	0	11	6	6	842	-0.0299829	0.0111296	102.5	97.5
Q8N4A0	Polypeptide N-acetylgalactosaminyltransferase 4 OS=Homo sapiens OX=9606 GN=GALNT4 PE=1 SV=2	0	8	4	2	578	-0.0285692	0.00861078	98.1	101.9
O96005	Cleft lip and palate transmembrane protein 1 OS=Homo sapiens OX=9606 GN=CLPTM1 PE=1 SV=1	0	17	10	10	669	-0.0285692	0.014129	97	103
H7BZJ3	Protein disulfide-isomerase A3 (Fragment) OS=Homo sapiens OX=9606 GN=PDIA3 PE=1 SV=1	0	32	3	1	123	-0.0285692	0.0104655	101	99
Q9Y672	Dolichyl pyrophosphate Man9GlcNAc2 alpha-1,3-glucosyltransferase OS=Homo sapiens OX=9606 GN=ALG6 PE=1 SV=2	0	5	2	2	507	-0.0271541	0.00861078	101.1	98.9
Q14669-2	Isoform 2 of E3 ubiquitin-protein ligase TRIP12 OS=Homo sapiens OX=9606 GN=TRIP12	0	16	23	23	2025	-0.0271541	0.0108018	101.8	98.2
P04843	Dolichyl-diphosphooligosaccharide--protein glycosyltransferase subunit 1 OS=Homo sapiens OX=9606 GN=RPN1 PE=1 SV=1	0	39	16	16	607	-0.0271541	0.00681627	101.3	98.7
B1ALM5	Transmembrane protein 9 OS=Homo sapiens OX=9606 GN=TMEM9 PE=1 SV=1	0	10	1	1	186	-0.0271541	0.00681627	101	99
Q9Y388	RNA-binding motif protein, X-linked 2 OS=Homo sapiens OX=9606 GN=RBMX2 PE=1 SV=2	0	7	2	2	322	-0.0257376	0.00956963	100.1	99.9
Q969Y0	NXPE family member 3 OS=Homo sapiens OX=9606 GN=NXPE3 PE=2 SV=1	0	5	2	2	559	-0.0257376	0.00613614	99.6	100.4
Q8IXM2-2	Isoform 2 of Chromatin complexes subunit BAP18 OS=Homo sapiens OX=9606 GN=BAP18	0	37	3	1	138	-0.0257376	0.00526822	99	101
Q15560	Transcription elongation factor A protein 2 OS=Homo sapiens OX=9606 GN=TCEA2 PE=1 SV=1	0	8	2	2	299	-0.0257376	0.00681627	97.7	102.3
Q13444	Disintegrin and metalloproteinase domain-containing protein 15 OS=Homo sapiens OX=9606 GN=ADAM15 PE=1 SV=4	0	16	10	10	863	-0.0257376	0.0104655	101.1	98.9
Q9NZM4	BRD4-interacting chromatin-remodeling complex-associated protein OS=Homo sapiens OX=9606 GN=BICRA PE=1 SV=2	0	14	13	13	1560	-0.0243197	0.00681627	103.7	96.3
Q8IW35-2	Isoform 2 of Centrosomal protein of 97 kDa OS=Homo sapiens OX=9606 GN=CEP97	0	7	4	4	891	-0.0243197	0.00519281	100.8	99.2
Q9Y294	Histone chaperone ASF1A OS=Homo sapiens OX=9606 GN=ASF1A PE=1 SV=1	0.001	7	1	1	204	-0.0229004	0.00735236	102.6	97.4
Q9NRR4	Ribonuclease 3 OS=Homo sapiens OX=9606 GN=DROSHA PE=1 SV=2	0	19	17	17	1374	-0.0229004	0.0111296	95.6	104.4
Q96IZ0	PRKC apoptosis WT1 regulator protein OS=Homo sapiens OX=9606 GN=PAWR PE=1 SV=1	0.001	5	1	1	340	-0.0229004	0.00569828	101.9	98.1
P52907	F-actin-capping protein subunit alpha-1 OS=Homo sapiens OX=9606 GN=CAPZA1 PE=1 SV=3	0	31	5	5	286	-0.0229004	0.00681627	100.2	99.8
Q9UNK0	Syntaxin-8 OS=Homo sapiens OX=9606 GN=STX8 PE=1 SV=2	0	12	2	2	236	-0.0214797	0.00681627	100.6	99.4
Q9HBH1	Peptide deformylase, mitochondrial OS=Homo sapiens OX=9606 GN=PDF PE=1 SV=1	0	26	4	4	243	-0.0214797	0.00681627	84.2	115.8
Q9BY50	Signal peptidase complex catalytic subunit SEC11C OS=Homo sapiens OX=9606 GN=SEC11C PE=1 SV=3	0	20	3	3	192	-0.0214797	0.00912679	104.5	95.5
Q8WUJ1	Neuferricin OS=Homo sapiens OX=9606 GN=CYB5D2 PE=2 SV=1	0	17	3	3	264	-0.0214797	0.00667888	96.9	103.1
Q8TED0	U3 small nucleolar RNA-associated protein 15 homolog OS=Homo sapiens OX=9606 GN=UTP15 PE=1 SV=3	0	17	7	7	518	-0.0214797	0.00906651	95.4	104.6
P61962	DDB1- and CUL4-associated factor 7 OS=Homo sapiens OX=9606 GN=DCAF7 PE=1 SV=1	0	11	3	3	342	-0.0214797	0.0104655	104.2	95.8
P61011	Signal recognition particle 54 kDa protein OS=Homo sapiens OX=9606 GN=SRP54 PE=1 SV=1	0	17	7	7	504	-0.0214797	0.00535755	89.6	110.4
P41221	Protein Wnt-5a OS=Homo sapiens OX=9606 GN=WNT5A PE=1 SV=2	0	11	3	2	380	-0.0214797	0.00663698	101.8	98.2
P21964	Catechol O-methyltransferase OS=Homo sapiens OX=9606 GN=COMT PE=1 SV=2	0	20	4	4	271	-0.0214797	0.00685421	101	99
P13647	Keratin, type II cytoskeletal 5 OS=Homo sapiens OX=9606 GN=KRT5 PE=1 SV=3	0	26	15	9	590	-0.0214797	0.00545446	92.6	107.4
P08240	Signal recognition particle receptor subunit alpha OS=Homo sapiens OX=9606 GN=SRPRA PE=1 SV=2	0	23	12	12	638	-0.0214797	0.00535755	99.3	100.7
O75592	E3 ubiquitin-protein ligase MYCBP2 OS=Homo sapiens OX=9606 GN=MYCBP2 PE=1 SV=4	0	6	20	20	4678	-0.0214797	0.0104655	96	104
A0A590UJK3	Sarcolemmal membrane-associated protein OS=Homo sapiens OX=9606 GN=SLMAP PE=4 SV=1	0	8	6	6	842	-0.0214797	0.00681627	101.1	98.9
Q9Y5L4	Mitochondrial import inner membrane translocase subunit Tim13 OS=Homo sapiens OX=9606 GN=TIMM13 PE=1 SV=1	0	54	4	4	95	-0.0200577	0.00526822	102.6	97.4
Q9UBU6	Protein FAM8A1 OS=Homo sapiens OX=9606 GN=FAM8A1 PE=1 SV=1	0	40	9	9	413	-0.0200577	0.00526822	88.9	111.1
Q8WVM8	Sec1 family domain-containing protein 1 OS=Homo sapiens OX=9606 GN=SCFD1 PE=1 SV=4	0	16	7	7	642	-0.0200577	0.00681627	101.1	98.9
Q8NEJ9	Neuroguidin OS=Homo sapiens OX=9606 GN=NGDN PE=1 SV=1	0	11	3	3	315	-0.0200577	0.00681627	120.7	79.3
Q9Y6A1	Protein O-mannosyl-transferase 1 OS=Homo sapiens OX=9606 GN=POMT1 PE=1 SV=3	0	5	3	3	747	-0.0186342	0.00526822	96.6	103.4
Q9Y305-4	Isoform 4 of Acyl-coenzyme A thioesterase 9, mitochondrial OS=Homo sapiens OX=9606 GN=ACOT9	0	26	9	9	448	-0.0186342	0.00787679	103	97
Q9Y2R4	Probable ATP-dependent RNA helicase DDX52 OS=Homo sapiens OX=9606 GN=DDX52 PE=1 SV=3	0	27	10	9	599	-0.0186342	0.00861078	111.1	88.9
Q9UBH6	Xenotropic and polytropic retrovirus receptor 1 OS=Homo sapiens OX=9606 GN=XPR1 PE=1 SV=1	0	6	3	3	696	-0.0186342	0.00144032	103.7	96.3
Q92896-2	Isoform 2 of Golgi apparatus protein 1 OS=Homo sapiens OX=9606 GN=GLG1	0	23	19	19	1203	-0.0186342	0.0104655	99.6	100.4
Q6Y288	Beta-1,3-glucosyltransferase OS=Homo sapiens OX=9606 GN=B3GLCT PE=1 SV=2	0	7	3	3	498	-0.0186342	0.00587798	96.5	103.5
Q12907	Vesicular integral-membrane protein VIP36 OS=Homo sapiens OX=9606 GN=LMAN2 PE=1 SV=1	0	53	13	13	356	-0.0186342	0.00526822	100.1	99.9
Q02086	Transcription factor Sp2 OS=Homo sapiens OX=9606 GN=SP2 PE=1 SV=3	0	10	4	4	613	-0.0186342	0.00735236	101.6	98.4
O75817	Ribonuclease P protein subunit p20 OS=Homo sapiens OX=9606 GN=POP7 PE=1 SV=2	0	11	1	1	140	-0.0186342	0.00681627	100.6	99.4
O75052	Carboxyl-terminal PDZ ligand of neuronal nitric oxide synthase protein OS=Homo sapiens OX=9606 GN=NOS1AP PE=1 SV=3	0	15	7	7	506	-0.0186342	0.00861078	114	86
F6S8M0	N-acetylglucosamine-6-sulfatase OS=Homo sapiens OX=9606 GN=GNS PE=1 SV=1	0	14	7	7	584	-0.0186342	0.00861078	101.1	98.9
A6NIW2	Dedicator of cytokinesis protein 11 OS=Homo sapiens OX=9606 GN=DOCK11 PE=1 SV=2	0	16	26	4	2077	-0.0186342	0.0104655	100.2	99.8
A0A0A6YYJ5	Microtubule-actin cross-linking factor 1, isoforms 1/2/3/5 (Fragment) OS=Homo sapiens OX=9606 GN=MACF1 PE=1 SV=2	0	12	13	5	1668	-0.0186342	0.00681627	100.2	99.8
S4R3N1	HSPE1-MOB4 readthrough OS=Homo sapiens OX=9606 GN=HSPE1-MOB4 PE=3 SV=1	0	11	2	2	261	-0.0172093	0.00526822	99.8	100.2
Q96PV6	Leukocyte receptor cluster member 8 OS=Homo sapiens OX=9606 GN=LENG8 PE=1 SV=3	0	30	15	15	800	-0.0172093	0.0100666	93.4	106.6
Q27J81	Inverted formin-2 OS=Homo sapiens OX=9606 GN=INF2 PE=1 SV=2	0	11	9	9	1249	-0.0172093	0.00526822	97.7	102.3
Q15022	Polycomb protein SUZ12 OS=Homo sapiens OX=9606 GN=SUZ12 PE=1 SV=3	0	14	7	7	739	-0.0172093	0.00856679	95.1	104.9
P67812-3	Isoform 3 of Signal peptidase complex catalytic subunit SEC11A OS=Homo sapiens OX=9606 GN=SEC11A	0	15	3	3	185	-0.0172093	0.00526822	104.2	95.8
P18850	Cyclic AMP-dependent transcription factor ATF-6 alpha OS=Homo sapiens OX=9606 GN=ATF6 PE=1 SV=3	0	20	11	11	670	-0.0172093	0.0104655	98.8	101.2
A0A494C108	Protein KRI1 homolog OS=Homo sapiens OX=9606 GN=KRI1 PE=1 SV=1	0	27	10	10	709	-0.0172093	0.00893268	100.7	99.3
Q92572	AP-3 complex subunit sigma-1 OS=Homo sapiens OX=9606 GN=AP3S1 PE=1 SV=1	0	33	5	5	193	-0.015783	0.00739092	99.8	100.2
Q02224	Centromere-associated protein E OS=Homo sapiens OX=9606 GN=CENPE PE=1 SV=2	0	6	14	14	2701	-0.015783	0.00526822	99.5	100.5
Q96M89	Coiled-coil domain-containing protein 138 OS=Homo sapiens OX=9606 GN=CCDC138 PE=1 SV=1	0	16	7	7	665	-0.0143553	0.00739092	105.9	94.1
Q92928	Putative Ras-related protein Rab-1C OS=Homo sapiens OX=9606 GN=RAB1C PE=5 SV=2	0	31	5	3	201	-0.0143553	0.00861078	100.2	99.8
P50548	ETS domain-containing transcription factor ERF OS=Homo sapiens OX=9606 GN=ERF PE=1 SV=2	0	7	2	2	548	-0.0143553	0.00524747	95	105
P13612	Integrin alpha-4 OS=Homo sapiens OX=9606 GN=ITGA4 PE=1 SV=3	0	7	6	6	1032	-0.0143553	0.00681627	99.7	100.3
A5YKK6	CCR4-NOT transcription complex subunit 1 OS=Homo sapiens OX=9606 GN=CNOT1 PE=1 SV=2	0	8	16	16	2376	-0.0143553	0.00861078	97.6	102.4
Q9Y450	HBS1-like protein OS=Homo sapiens OX=9606 GN=HBS1L PE=1 SV=1	0	19	9	9	684	-0.0129262	0.00435402	108	92
Q9NYV4	Cyclin-dependent kinase 12 OS=Homo sapiens OX=9606 GN=CDK12 PE=1 SV=2	0	33	33	25	1490	-0.0129262	0.0040385	100.6	99.4
Q9BRK0-2	Isoform 2 of Receptor expression-enhancing protein 2 OS=Homo sapiens OX=9606 GN=REEP2	0.001	9	1	1	254	-0.0129262	0.00399464	91.2	108.8
Q8WU76	Sec1 family domain-containing protein 2 OS=Homo sapiens OX=9606 GN=SCFD2 PE=1 SV=2	0	8	4	4	684	-0.0129262	0.00177595	102.5	97.5
Q8NBL1	Protein O-glucosyltransferase 1 OS=Homo sapiens OX=9606 GN=POGLUT1 PE=1 SV=1	0	18	6	6	392	-0.0129262	0.00735236	101.1	98.9
P37108	Signal recognition particle 14 kDa protein OS=Homo sapiens OX=9606 GN=SRP14 PE=1 SV=2	0	26	3	3	136	-0.0129262	0.00566918	95.7	104.3
P06730-2	Isoform 2 of Eukaryotic translation initiation factor 4E OS=Homo sapiens OX=9606 GN=EIF4E	0	24	6	6	248	-0.0129262	0.00735236	99.4	100.6
O43143	Pre-mRNA-splicing factor ATP-dependent RNA helicase DHX15 OS=Homo sapiens OX=9606 GN=DHX15 PE=1 SV=2	0	49	32	31	795	-0.0129262	0.0040385	96	104
Q9NTJ5	Phosphatidylinositide phosphatase SAC1 OS=Homo sapiens OX=9606 GN=SACM1L PE=1 SV=2	0	9	4	4	587	-0.0114956	0.00681627	91.6	108.4
Q96HE7	ERO1-like protein alpha OS=Homo sapiens OX=9606 GN=ERO1A PE=1 SV=2	0	56	19	18	468	-0.0114956	0.00354454	101.7	98.3
Q96F46-2	Isoform 2 of Interleukin-17 receptor A OS=Homo sapiens OX=9606 GN=IL17RA	0	21	10	10	832	-0.0114956	0.00775419	99.6	100.4
Q969Q6	Serine/threonine-protein phosphatase 2A regulatory subunit B'' subunit gamma OS=Homo sapiens OX=9606 GN=PPP2R3C PE=1 SV=1	0	9	3	3	453	-0.0114956	0.00535755	99.6	100.4
Q14677-3	Isoform 3 of Clathrin interactor 1 OS=Homo sapiens OX=9606 GN=CLINT1	0	18	9	9	643	-0.0114956	0.00681627	98.4	101.6
O60783	28S ribosomal protein S14, mitochondrial OS=Homo sapiens OX=9606 GN=MRPS14 PE=1 SV=1	0	12	1	1	128	-0.0114956	0.00535755	100.4	99.6
A0A286YFF7	Palmitoyl-protein thioesterase 1 OS=Homo sapiens OX=9606 GN=PPT1 PE=1 SV=1	0	10	2	2	335	-0.0114956	0.00667888	99.2	100.8
A0A087WY68	Proprotein convertase subtilisin/kexin type 6 OS=Homo sapiens OX=9606 GN=PCSK6 PE=1 SV=1	0	24	14	2	975	-0.0114956	0.00861078	97	103
Q9Y697	Cysteine desulfurase, mitochondrial OS=Homo sapiens OX=9606 GN=NFS1 PE=1 SV=3	0	7	2	2	457	-0.0100637	0.00168	102.2	97.8
Q86XP3	ATP-dependent RNA helicase DDX42 OS=Homo sapiens OX=9606 GN=DDX42 PE=1 SV=1	0	9	6	6	938	-0.0100637	0.00677611	102.5	97.5
Q70UQ0-4	Isoform 4 of Inhibitor of nuclear factor kappa-B kinase-interacting protein OS=Homo sapiens OX=9606 GN=IKBIP	0	40	12	10	377	-0.0100637	0.0032407	100.1	99.9
Q6SJ96	TATA box-binding protein-like protein 2 OS=Homo sapiens OX=9606 GN=TBPL2 PE=2 SV=1	0	9	2	2	375	-0.0100637	0.00663698	98.5	101.5
P49411	Elongation factor Tu, mitochondrial OS=Homo sapiens OX=9606 GN=TUFM PE=1 SV=2	0	50	15	15	452	-0.0100637	0.0032407	107.2	92.8
P29375	Lysine-specific demethylase 5A OS=Homo sapiens OX=9606 GN=KDM5A PE=1 SV=3	0	12	16	16	1690	-0.0100637	0.00681627	103.3	96.7
A6NFI3	Zinc finger protein 316 OS=Homo sapiens OX=9606 GN=ZNF316 PE=1 SV=1	0	8	4	4	1004	-0.0100637	0.00677611	101.6	98.4
O75330-3	Isoform 3 of Hyaluronan mediated motility receptor OS=Homo sapiens OX=9606 GN=HMMR	0	39	26	26	725	-0.00863031	0.0027996	99.3	100.7
O14672	Disintegrin and metalloproteinase domain-containing protein 10 OS=Homo sapiens OX=9606 GN=ADAM10 PE=1 SV=1	0	21	12	12	748	-0.00863031	0.00761004	99.1	100.9
A0A1W2PNP0	GPI transamidase component PIG-T (Fragment) OS=Homo sapiens OX=9606 GN=PIGT PE=1 SV=1	0	18	8	4	580	-0.00863031	0.00535755	109.2	90.8
A0A024QZP7	Cell division cycle 2, G1 to S and G2 to M, isoform CRA_a OS=Homo sapiens OX=9606 GN=CDK1 PE=1 SV=1	0	14	4	2	297	-0.00863031	0.0032407	100.3	99.7
Q9H1I8	Activating signal cointegrator 1 complex subunit 2 OS=Homo sapiens OX=9606 GN=ASCC2 PE=1 SV=3	0	13	6	6	757	-0.0071955	0.00663698	101.6	98.4
Q9GZU3	Transmembrane protein 39B OS=Homo sapiens OX=9606 GN=TMEM39B PE=1 SV=1	0	30	9	9	492	-0.0071955	0.00681627	106.2	93.8
Q8WXH0-2	Isoform 2 of Nesprin-2 OS=Homo sapiens OX=9606 GN=SYNE2	0	8	42	42	6907	-0.0071955	0.00681627	96.4	103.6
Q8N9N2-2	Isoform 2 of Activating signal cointegrator 1 complex subunit 1 OS=Homo sapiens OX=9606 GN=ASCC1	0	6	2	2	357	-0.0071955	0.00234311	98.2	101.8
Q8IY37	Probable ATP-dependent RNA helicase DHX37 OS=Homo sapiens OX=9606 GN=DHX37 PE=1 SV=1	0	17	13	13	1157	-0.0071955	0.00681627	99.7	100.3
Q13084	39S ribosomal protein L28, mitochondrial OS=Homo sapiens OX=9606 GN=MRPL28 PE=1 SV=4	0	45	9	9	256	-0.0071955	0.00799349	92.9	107.1
Q92600	CCR4-NOT transcription complex subunit 9 OS=Homo sapiens OX=9606 GN=CNOT9 PE=1 SV=1	0	20	5	5	299	-0.00575927	0.00191375	99.3	100.7
Q15334	Lethal(2) giant larvae protein homolog 1 OS=Homo sapiens OX=9606 GN=LLGL1 PE=1 SV=3	0	20	14	14	1064	-0.00575927	0.00681627	97.8	102.2
H7C3M7	FERM, ARHGEF and pleckstrin domain-containing protein 2 (Fragment) OS=Homo sapiens OX=9606 GN=FARP2 PE=1 SV=2	0	16	6	3	482	-0.00575927	0.00524004	101.6	98.4
Q3T8J9	GON-4-like protein OS=Homo sapiens OX=9606 GN=GON4L PE=1 SV=1	0	6	9	9	2241	-0.00432161	0.00494674	101.6	98.4
P37287	Phosphatidylinositol N-acetylglucosaminyltransferase subunit A OS=Homo sapiens OX=9606 GN=PIGA PE=1 SV=1	0	11	4	4	484	-0.00432161	4.29047e-05	96.9	103.1
P20340	Ras-related protein Rab-6A OS=Homo sapiens OX=9606 GN=RAB6A PE=1 SV=3	0	16	3	2	208	-0.00432161	0.00526822	98.7	101.3
P06753-2	Isoform 2 of Tropomyosin alpha-3 chain OS=Homo sapiens OX=9606 GN=TPM3	0	19	4	4	248	-0.00432161	0.00519281	96.3	103.7
J3KQJ1	Inactive C-alpha-formylglycine-generating enzyme 2 OS=Homo sapiens OX=9606 GN=SUMF2 PE=1 SV=1	0	22	7	7	320	-0.00432161	0.00681627	99	101
A0A0B4J1V9	Helicase, lymphoid-specific, isoform CRA_b OS=Homo sapiens OX=9606 GN=HELLS PE=1 SV=1	0	25	21	20	884	-0.00432161	0.00202542	98.1	101.9
Q9Y644	Beta-1,3-N-acetylglucosaminyltransferase radical fringe OS=Homo sapiens OX=9606 GN=RFNG PE=2 SV=3	0	10	2	2	331	-0.00288251	0.00283944	100.1	99.9
Q6UWP7	Lysocardiolipin acyltransferase 1 OS=Homo sapiens OX=9606 GN=LCLAT1 PE=1 SV=1	0	8	3	3	414	-0.00288251	0.00613614	99.6	100.4
Q68CP9	AT-rich interactive domain-containing protein 2 OS=Homo sapiens OX=9606 GN=ARID2 PE=1 SV=2	0	17	21	21	1835	-0.00288251	0.00301424	99	101
Q13263	Transcription intermediary factor 1-beta OS=Homo sapiens OX=9606 GN=TRIM28 PE=1 SV=5	0	50	22	10	835	-0.00288251	0.00191375	99.2	100.8
P84022	Mothers against decapentaplegic homolog 3 OS=Homo sapiens OX=9606 GN=SMAD3 PE=1 SV=1	0	8	3	3	425	-0.00288251	0.00234311	100	100
P25205-2	Isoform 2 of DNA replication licensing factor MCM3 OS=Homo sapiens OX=9606 GN=MCM3	0	17	10	10	853	-0.00288251	0.00681627	106.5	93.5
P16278	Beta-galactosidase OS=Homo sapiens OX=9606 GN=GLB1 PE=1 SV=2	0	20	10	9	677	-0.00288251	0.00681627	99.4	100.6
P13497	Bone morphogenetic protein 1 OS=Homo sapiens OX=9606 GN=BMP1 PE=1 SV=2	0	5	3	3	986	-0.00288251	0.0032407	98	102
O43824	Putative GTP-binding protein 6 OS=Homo sapiens OX=9606 GN=GTPBP6 PE=2 SV=4	0	16	5	5	516	-0.00288251	0.00681627	100.2	99.8
O15270	Serine palmitoyltransferase 2 OS=Homo sapiens OX=9606 GN=SPTLC2 PE=1 SV=1	0	7	3	3	562	-0.00288251	0.000239336	103.7	96.3
Q96MF7	E3 SUMO-protein ligase NSE2 OS=Homo sapiens OX=9606 GN=NSMCE2 PE=1 SV=2	0	23	4	4	247	-0.00144197	0.00231437	79.2	120.8
Q8NHP6	Motile sperm domain-containing protein 2 OS=Homo sapiens OX=9606 GN=MOSPD2 PE=1 SV=1	0	5	2	2	518	-0.00144197	0.00234311	102.1	97.9
Q03936	Zinc finger protein 92 OS=Homo sapiens OX=9606 GN=ZNF92 PE=2 SV=2	0	5	3	1	586	-0.00144197	0.00234311	108.1	91.9
P52272	Heterogeneous nuclear ribonucleoprotein M OS=Homo sapiens OX=9606 GN=HNRNPM PE=1 SV=3	0	50	25	13	730	-0.00144197	0.00179422	99.6	100.4
P17152	Transmembrane protein 11, mitochondrial OS=Homo sapiens OX=9606 GN=TMEM11 PE=1 SV=1	0	17	3	3	192	-0.00144197	0.00231072	98.4	101.6
J3KR35	Coiled-coil domain containing 12, isoform CRA_a OS=Homo sapiens OX=9606 GN=CCDC12 PE=1 SV=1	0	28	3	3	179	-0.00144197	0.00681627	99.8	100.2
G5EA30	CUG triplet repeat, RNA binding protein 1, isoform CRA_c OS=Homo sapiens OX=9606 GN=CELF1 PE=1 SV=1	0	8	4	4	514	-0.00144197	0.00524004	77.1	122.9
Q9NQG5	Regulation of nuclear pre-mRNA domain-containing protein 1B OS=Homo sapiens OX=9606 GN=RPRD1B PE=1 SV=1	0	12	3	3	326	0	0.00179422	101.7	98.3
Q9BV94	ER degradation-enhancing alpha-mannosidase-like protein 2 OS=Homo sapiens OX=9606 GN=EDEM2 PE=1 SV=2	0	24	10	10	578	0	0.00662602	87.1	112.9
Q96S52	GPI transamidase component PIG-S OS=Homo sapiens OX=9606 GN=PIGS PE=1 SV=3	0	30	11	11	555	0	0.00667888	99.5	100.5
Q8IWF2	FAD-dependent oxidoreductase domain-containing protein 2 OS=Homo sapiens OX=9606 GN=FOXRED2 PE=1 SV=1	0	23	11	11	684	0	0.00681627	97.2	102.8
Q7Z7H8-2	Isoform 2 of 39S ribosomal protein L10, mitochondrial OS=Homo sapiens OX=9606 GN=MRPL10	0	33	4	4	271	0	0.00274788	103.2	96.8
O43264	Centromere/kinetochore protein zw10 homolog OS=Homo sapiens OX=9606 GN=ZW10 PE=1 SV=3	0	11	6	6	779	0	0.00519281	103.4	96.6
Q9UMY1	Nucleolar protein 7 OS=Homo sapiens OX=9606 GN=NOL7 PE=1 SV=2	0	16	3	3	257	0.00144342	0.00663698	99.2	100.8
Q9NSE4	Isoleucine--tRNA ligase, mitochondrial OS=Homo sapiens OX=9606 GN=IARS2 PE=1 SV=2	0	9	8	8	1012	0.00144342	0.00663698	96.7	103.3
Q02818	Nucleobindin-1 OS=Homo sapiens OX=9606 GN=NUCB1 PE=1 SV=4	0	29	9	9	461	0.00144342	0.00681627	100.3	99.7
O15063	Uncharacterized protein KIAA0355 OS=Homo sapiens OX=9606 GN=KIAA0355 PE=1 SV=2	0	10	7	7	1070	0.00144342	0.00179422	99.4	100.6
Q8IYK4	Procollagen galactosyltransferase 2 OS=Homo sapiens OX=9606 GN=COLGALT2 PE=1 SV=1	0	7	4	4	626	0.00288828	0.00202542	118.5	81.5
Q12981-1	Isoform 3 of Vesicle transport protein SEC20 OS=Homo sapiens OX=9606 GN=BNIP1	0	31	6	6	271	0.00288828	0.00335707	96.9	103.1
P63104	14-3-3 protein zeta/delta OS=Homo sapiens OX=9606 GN=YWHAZ PE=1 SV=1	0	24	4	3	245	0.00288828	0.00168	103.7	96.3
P52294	Importin subunit alpha-5 OS=Homo sapiens OX=9606 GN=KPNA1 PE=1 SV=3	0	12	4	2	538	0.00288828	0.00179422	103.6	96.4
F6QMI7	Dystonin OS=Homo sapiens OX=9606 GN=DST PE=1 SV=2	0	10	42	38	5537	0.00288828	0.00681627	99.4	100.6
Q9P0L0	Vesicle-associated membrane protein-associated protein A OS=Homo sapiens OX=9606 GN=VAPA PE=1 SV=3	0	34	6	5	249	0.00433459	0.0014952	104.4	95.6
Q96RL7	Vacuolar protein sorting-associated protein 13A OS=Homo sapiens OX=9606 GN=VPS13A PE=1 SV=2	0	13	31	31	3174	0.00433459	0.00526822	101.4	98.6
P61077-3	Isoform 3 of Ubiquitin-conjugating enzyme E2 D3 OS=Homo sapiens OX=9606 GN=UBE2D3	0.003	7	1	1	149	0.00433459	0.00236535	99.9	100.1
P30048	Thioredoxin-dependent peroxide reductase, mitochondrial OS=Homo sapiens OX=9606 GN=PRDX3 PE=1 SV=3	0	30	5	5	256	0.00433459	0.00526822	100.6	99.4
O43852-3	Isoform 3 of Calumenin OS=Homo sapiens OX=9606 GN=CALU	0	42	11	4	323	0.00433459	0.00663698	91.9	108.1
Q92973	Transportin-1 OS=Homo sapiens OX=9606 GN=TNPO1 PE=1 SV=2	0	6	4	4	898	0.00578235	0.00200618	101.7	98.3
Q6Y7W6	GRB10-interacting GYF protein 2 OS=Homo sapiens OX=9606 GN=GIGYF2 PE=1 SV=1	0	20	17	17	1299	0.00578235	0.000847613	99.3	100.7
P29597	Non-receptor tyrosine-protein kinase TYK2 OS=Homo sapiens OX=9606 GN=TYK2 PE=1 SV=3	0	15	13	13	1187	0.00578235	0.00179422	95.5	104.5
Q9H9Y6-3	Isoform 3 of DNA-directed RNA polymerase I subunit RPA2 OS=Homo sapiens OX=9606 GN=POLR1B	0	19	17	17	1173	0.00723157	0.00681627	99.9	100.1
Q7L590	Protein MCM10 homolog OS=Homo sapiens OX=9606 GN=MCM10 PE=1 SV=2	0	7	5	5	875	0.00723157	0.00179422	95.9	104.1
Q6P1K8	General transcription factor IIH subunit 2-like protein OS=Homo sapiens OX=9606 GN=GTF2H2C PE=1 SV=1	0	20	6	6	395	0.00723157	0.00519281	97.6	102.4
P51688	N-sulphoglucosamine sulphohydrolase OS=Homo sapiens OX=9606 GN=SGSH PE=1 SV=1	0	10	5	5	502	0.00723157	0.00179422	100	100
P31314	T-cell leukemia homeobox protein 1 OS=Homo sapiens OX=9606 GN=TLX1 PE=1 SV=1	0	14	2	2	330	0.00723157	4.29047e-05	99.7	100.3
A0A0A0MTI1	Delta(24)-sterol reductase OS=Homo sapiens OX=9606 GN=DHCR24 PE=1 SV=1	0	15	6	6	528	0.00723157	0.00350144	103.8	96.2
Q9HBE1	POZ-, AT hook-, and zinc finger-containing protein 1 OS=Homo sapiens OX=9606 GN=PATZ1 PE=1 SV=1	0	21	9	9	687	0.00868224	0.0032407	100.9	99.1
Q9BQ67	Glutamate-rich WD repeat-containing protein 1 OS=Homo sapiens OX=9606 GN=GRWD1 PE=1 SV=1	0	27	8	8	446	0.00868224	0.00526822	99.1	100.9
Q6ZRP7	Sulfhydryl oxidase 2 OS=Homo sapiens OX=9606 GN=QSOX2 PE=1 SV=3	0	24	13	13	698	0.00868224	0.00335707	105.2	94.8
Q5VT52	Regulation of nuclear pre-mRNA domain-containing protein 2 OS=Homo sapiens OX=9606 GN=RPRD2 PE=1 SV=1	0	18	17	17	1461	0.00868224	0.00526822	99.6	100.4
Q9NV96	Cell cycle control protein 50A OS=Homo sapiens OX=9606 GN=TMEM30A PE=1 SV=1	0	10	3	3	361	0.0101344	0.000176757	100.1	99.9
Q9NPJ6	Mediator of RNA polymerase II transcription subunit 4 OS=Homo sapiens OX=9606 GN=MED4 PE=1 SV=1	0	43	9	9	270	0.0101344	0.00526822	100	100
Q96HE9	Proline-rich protein 11 OS=Homo sapiens OX=9606 GN=PRR11 PE=1 SV=1	0	22	6	6	360	0.0101344	0.00494674	98.3	101.7
Q8TDN6	Ribosome biogenesis protein BRX1 homolog OS=Homo sapiens OX=9606 GN=BRIX1 PE=1 SV=2	0	43	9	9	353	0.0101344	0.00494674	97.7	102.3
Q86VI3	Ras GTPase-activating-like protein IQGAP3 OS=Homo sapiens OX=9606 GN=IQGAP3 PE=1 SV=2	0	7	7	7	1631	0.0101344	0.00264229	97.7	102.3
A0A2R8Y5A3	Catenin beta-1 OS=Homo sapiens OX=9606 GN=CTNNB1 PE=1 SV=1	0	21	12	11	783	0.0101344	0.00350144	98.7	101.3
A0A0A0MT33	SR-related and CTD-associated factor 8 OS=Homo sapiens OX=9606 GN=SCAF8 PE=1 SV=1	0	27	26	23	1349	0.0101344	4.29047e-05	98.6	101.4
Q9UI43	rRNA methyltransferase 2, mitochondrial OS=Homo sapiens OX=9606 GN=MRM2 PE=1 SV=1	0	14	3	3	246	0.011588	0.00217163	101.2	98.8
Q9BQC6	Ribosomal protein 63, mitochondrial OS=Homo sapiens OX=9606 GN=MRPL57 PE=1 SV=1	0	13	1	1	102	0.011588	4.29047e-05	102.2	97.8
Q14980	Nuclear mitotic apparatus protein 1 OS=Homo sapiens OX=9606 GN=NUMA1 PE=1 SV=2	0	31	43	1	2115	0.011588	4.29047e-05	99	101
P30533	Alpha-2-macroglobulin receptor-associated protein OS=Homo sapiens OX=9606 GN=LRPAP1 PE=1 SV=1	0	24	8	8	357	0.011588	4.29047e-05	104.3	95.7
O43175	D-3-phosphoglycerate dehydrogenase OS=Homo sapiens OX=9606 GN=PHGDH PE=1 SV=4	0	5	2	2	533	0.011588	0.00179422	99.6	100.4
O00468	Agrin OS=Homo sapiens OX=9606 GN=AGRN PE=1 SV=6	0	15	22	22	2068	0.011588	0.00526822	99.1	100.9
Q9Y6U3	Adseverin OS=Homo sapiens OX=9606 GN=SCIN PE=1 SV=4	0	20	9	9	715	0.013043	0.00168	100.2	99.8
Q9H1A3	Methyltransferase-like protein 9 OS=Homo sapiens OX=9606 GN=METTL9 PE=2 SV=1	0	13	3	3	318	0.013043	0.00181967	99.3	100.7
Q96SB8-2	Isoform 2 of Structural maintenance of chromosomes protein 6 OS=Homo sapiens OX=9606 GN=SMC6	0	14	11	11	1117	0.013043	0.00236535	104.7	95.3
Q8WUA2	Peptidyl-prolyl cis-trans isomerase-like 4 OS=Homo sapiens OX=9606 GN=PPIL4 PE=1 SV=1	0	52	21	21	492	0.013043	4.29047e-05	98.4	101.6
Q8IXI2-3	Isoform 3 of Mitochondrial Rho GTPase 1 OS=Homo sapiens OX=9606 GN=RHOT1	0	10	6	5	691	0.013043	0.00179422	93.2	106.8
Q15149-9	Isoform 9 of Plectin OS=Homo sapiens OX=9606 GN=PLEC	0	26	91	87	4533	0.013043	4.29047e-05	96.9	103.1
P46736	Lys-63-specific deubiquitinase BRCC36 OS=Homo sapiens OX=9606 GN=BRCC3 PE=1 SV=2	0	40	9	9	316	0.013043	0.00179422	100.4	99.6
H0Y4R2	NADPH--cytochrome P450 reductase (Fragment) OS=Homo sapiens OX=9606 GN=POR PE=1 SV=1	0	21	10	10	725	0.013043	0.00494674	99.7	100.3
Q9NU22	Midasin OS=Homo sapiens OX=9606 GN=MDN1 PE=1 SV=2	0	26	98	98	5596	0.0144996	4.29047e-05	98.9	101.1
Q9HDC9	Adipocyte plasma membrane-associated protein OS=Homo sapiens OX=9606 GN=APMAP PE=1 SV=2	0	31	10	10	416	0.0144996	0.00526822	100.7	99.3
Q8IWZ8	SURP and G-patch domain-containing protein 1 OS=Homo sapiens OX=9606 GN=SUGP1 PE=1 SV=2	0	18	8	8	645	0.0144996	0.0032407	100.4	99.6
Q15050	Ribosome biogenesis regulatory protein homolog OS=Homo sapiens OX=9606 GN=RRS1 PE=1 SV=2	0	21	5	5	365	0.0144996	0.00179422	97.7	102.3
P82914	28S ribosomal protein S15, mitochondrial OS=Homo sapiens OX=9606 GN=MRPS15 PE=1 SV=1	0	7	2	2	257	0.0144996	0.00179422	98.1	101.9
P61019	Ras-related protein Rab-2A OS=Homo sapiens OX=9606 GN=RAB2A PE=1 SV=1	0	34	6	6	212	0.0144996	0.0032407	104.7	95.3
P14923	Junction plakoglobin OS=Homo sapiens OX=9606 GN=JUP PE=1 SV=3	0	15	8	7	745	0.0144996	0.00217163	94.6	105.4
Q9H9J4	Ubiquitin carboxyl-terminal hydrolase 42 OS=Homo sapiens OX=9606 GN=USP42 PE=1 SV=3	0	9	6	6	1324	0.0159576	4.29047e-05	97.1	102.9
Q9H8M2	Bromodomain-containing protein 9 OS=Homo sapiens OX=9606 GN=BRD9 PE=1 SV=2	0	30	11	11	597	0.0159576	0.00519281	105.1	94.9
Q3B7T1	Erythroid differentiation-related factor 1 OS=Homo sapiens OX=9606 GN=EDRF1 PE=1 SV=1	0	5	6	6	1238	0.0159576	0.00179422	100.1	99.9
Q03112-3	Isoform 2 of Histone-lysine N-methyltransferase MECOM OS=Homo sapiens OX=9606 GN=MECOM	0	11	11	7	1239	0.0159576	0.00234311	96.4	103.6
O94766	Galactosylgalactosylxylosylprotein 3-beta-glucuronosyltransferase 3 OS=Homo sapiens OX=9606 GN=B3GAT3 PE=1 SV=2	0	8	3	3	335	0.0159576	4.29047e-05	96.1	103.9
G3V1V0	Myosin light polypeptide 6 OS=Homo sapiens OX=9606 GN=MYL6 PE=1 SV=1	0	53	8	6	161	0.0159576	4.29047e-05	101.5	98.5
Q9UG63-2	Isoform 2 of ATP-binding cassette sub-family F member 2 OS=Homo sapiens OX=9606 GN=ABCF2	0	26	15	15	634	0.0174171	0.00526822	95.9	104.1
Q99590	Protein SCAF11 OS=Homo sapiens OX=9606 GN=SCAF11 PE=1 SV=2	0	22	20	17	1463	0.0174171	4.29047e-05	98.7	101.3
Q07065	Cytoskeleton-associated protein 4 OS=Homo sapiens OX=9606 GN=CKAP4 PE=1 SV=2	0	50	26	26	602	0.0174171	4.29047e-05	97.1	102.9
P61106	Ras-related protein Rab-14 OS=Homo sapiens OX=9606 GN=RAB14 PE=1 SV=4	0	17	3	2	215	0.0174171	4.29047e-05	149.9	50.1
P35250	Replication factor C subunit 2 OS=Homo sapiens OX=9606 GN=RFC2 PE=1 SV=3	0	45	13	13	354	0.0174171	4.29047e-05	98.4	101.6
P35249	Replication factor C subunit 4 OS=Homo sapiens OX=9606 GN=RFC4 PE=1 SV=2	0	37	9	9	363	0.0174171	4.29047e-05	100.4	99.6
O95613	Pericentrin OS=Homo sapiens OX=9606 GN=PCNT PE=1 SV=4	0	21	51	51	3336	0.0174171	4.29047e-05	99.6	100.4
Q9Y5J9	Mitochondrial import inner membrane translocase subunit Tim8 B OS=Homo sapiens OX=9606 GN=TIMM8B PE=1 SV=1	0	30	2	2	83	0.018878	4.29047e-05	98.7	101.3
Q9UFW8	CGG triplet repeat-binding protein 1 OS=Homo sapiens OX=9606 GN=CGGBP1 PE=1 SV=2	0	25	4	4	167	0.018878	0.00264229	101.1	98.9
Q9NP72-2	Isoform 2 of Ras-related protein Rab-18 OS=Homo sapiens OX=9606 GN=RAB18	0	29	5	5	235	0.018878	0.00268274	100.2	99.8
Q99435-3	Isoform 3 of Protein kinase C-binding protein NELL2 OS=Homo sapiens OX=9606 GN=NELL2	0	11	8	8	866	0.018878	4.29047e-05	98.1	101.9
Q8IW92	Beta-galactosidase-1-like protein 2 OS=Homo sapiens OX=9606 GN=GLB1L2 PE=2 SV=1	0	14	7	7	636	0.018878	0.000792406	95.3	104.7
O75665	Oral-facial-digital syndrome 1 protein OS=Homo sapiens OX=9606 GN=OFD1 PE=1 SV=1	0	13	10	10	1012	0.018878	0.00179422	97.9	102.1
Q9Y2D8	Afadin- and alpha-actinin-binding protein OS=Homo sapiens OX=9606 GN=SSX2IP PE=1 SV=3	0	21	10	10	614	0.0203404	0.00200618	104.4	95.6
Q9BQ04	RNA-binding protein 4B OS=Homo sapiens OX=9606 GN=RBM4B PE=1 SV=1	0	48	11	10	359	0.0203404	4.29047e-05	104.3	95.7
Q96SZ6	CDK5 regulatory subunit-associated protein 1 OS=Homo sapiens OX=9606 GN=CDK5RAP1 PE=1 SV=2	0	18	7	7	601	0.0203404	4.29047e-05	96.7	103.3
Q8WUY1	Protein THEM6 OS=Homo sapiens OX=9606 GN=THEM6 PE=1 SV=2	0	32	6	6	208	0.0203404	0.00231072	90.7	109.3
Q13356	RING-type E3 ubiquitin-protein ligase PPIL2 OS=Homo sapiens OX=9606 GN=PPIL2 PE=1 SV=1	0	20	8	8	520	0.0203404	0.00215899	101.4	98.6
P56557	Transmembrane protein 50B OS=Homo sapiens OX=9606 GN=TMEM50B PE=1 SV=2	0.001	8	1	1	158	0.0203404	4.29047e-05	99.3	100.7
P09543	2',3'-cyclic-nucleotide 3'-phosphodiesterase OS=Homo sapiens OX=9606 GN=CNP PE=1 SV=2	0	25	9	9	421	0.0203404	0.00179422	100.2	99.8
O15145	Actin-related protein 2/3 complex subunit 3 OS=Homo sapiens OX=9606 GN=ARPC3 PE=1 SV=3	0	13	2	2	178	0.0203404	0.000176757	99.6	100.4
Q96SN8	CDK5 regulatory subunit-associated protein 2 OS=Homo sapiens OX=9606 GN=CDK5RAP2 PE=1 SV=5	0	12	14	13	1893	0.0218044	0.00234311	98.4	101.6
Q06587	E3 ubiquitin-protein ligase RING1 OS=Homo sapiens OX=9606 GN=RING1 PE=1 SV=2	0	32	8	6	406	0.0218044	0.00202542	99.6	100.4
O43852-4	Isoform 4 of Calumenin OS=Homo sapiens OX=9606 GN=CALU	0	35	8	1	323	0.0218044	4.29047e-05	99.2	100.8
C9JIZ6	Prosaposin OS=Homo sapiens OX=9606 GN=PSAP PE=1 SV=2	0	27	10	10	527	0.0218044	0.00399464	94.6	105.4
Q9Y6A9	Signal peptidase complex subunit 1 OS=Homo sapiens OX=9606 GN=SPCS1 PE=1 SV=5	0	10	2	2	169	0.0232698	4.29047e-05	92	108
Q9BVI0	PHD finger protein 20 OS=Homo sapiens OX=9606 GN=PHF20 PE=1 SV=2	0	8	5	5	1012	0.0232698	0.000176757	96.6	103.4
Q96BN2	Transcriptional adapter 1 OS=Homo sapiens OX=9606 GN=TADA1 PE=1 SV=1	0	10	3	3	335	0.0232698	0.000176757	78.4	121.6
Q7Z6E9	E3 ubiquitin-protein ligase RBBP6 OS=Homo sapiens OX=9606 GN=RBBP6 PE=1 SV=1	0	20	24	24	1792	0.0232698	4.29047e-05	99.3	100.7
Q13217	DnaJ homolog subfamily C member 3 OS=Homo sapiens OX=9606 GN=DNAJC3 PE=1 SV=1	0	50	16	16	504	0.0232698	4.29047e-05	100.7	99.3
P39656	Dolichyl-diphosphooligosaccharide--protein glycosyltransferase 48 kDa subunit OS=Homo sapiens OX=9606 GN=DDOST PE=1 SV=4	0	43	12	12	456	0.0232698	4.29047e-05	101.6	98.4
P30044	Peroxiredoxin-5, mitochondrial OS=Homo sapiens OX=9606 GN=PRDX5 PE=1 SV=4	0.001	8	1	1	214	0.0232698	0.000978274	95.7	104.3
P05089-2	Isoform 2 of Arginase-1 OS=Homo sapiens OX=9606 GN=ARG1	0	12	3	3	330	0.0232698	0.000847613	82.9	117.1
Q9Y679	Ancient ubiquitous protein 1 OS=Homo sapiens OX=9606 GN=AUP1 PE=1 SV=2	0	37	9	9	410	0.0247367	0.00200618	105.4	94.6
Q8NHM5	Lysine-specific demethylase 2B OS=Homo sapiens OX=9606 GN=KDM2B PE=1 SV=1	0	8	8	8	1336	0.0247367	0.00179422	100.9	99.1
P46013-2	Isoform Short of Proliferation marker protein Ki-67 OS=Homo sapiens OX=9606 GN=MKI67	0	20	39	1	2896	0.0247367	4.29047e-05	99.1	100.9
O60907	F-box-like/WD repeat-containing protein TBL1X OS=Homo sapiens OX=9606 GN=TBL1X PE=1 SV=3	0	24	7	4	577	0.0247367	0.00176684	120	80
C9JJ19	28S ribosomal protein S34, mitochondrial OS=Homo sapiens OX=9606 GN=MRPS34 PE=1 SV=2	0	44	8	8	225	0.0247367	0.00264229	96.5	103.5
Q96EY1	DnaJ homolog subfamily A member 3, mitochondrial OS=Homo sapiens OX=9606 GN=DNAJA3 PE=1 SV=2	0	38	13	13	480	0.0262051	0.000239336	98.6	101.4
Q96AG4	Leucine-rich repeat-containing protein 59 OS=Homo sapiens OX=9606 GN=LRRC59 PE=1 SV=1	0	45	12	12	307	0.0262051	0.000239336	101.5	98.5
Q6ZTW0	Tubulin polyglutamylase complex subunit 1 OS=Homo sapiens OX=9606 GN=TPGS1 PE=1 SV=2	0.001	8	1	1	290	0.0262051	0.000239336	97.3	102.7
Q5JSZ5	Protein PRRC2B OS=Homo sapiens OX=9606 GN=PRRC2B PE=1 SV=2	0	6	10	10	2229	0.0262051	4.29047e-05	93.9	106.1
Q9UPP1	Histone lysine demethylase PHF8 OS=Homo sapiens OX=9606 GN=PHF8 PE=1 SV=3	0	18	16	16	1060	0.027675	0.00179422	95.6	104.4
Q9NVF7	F-box only protein 28 OS=Homo sapiens OX=9606 GN=FBXO28 PE=1 SV=1	0	13	4	4	368	0.027675	4.29047e-05	101	99
Q8N3C0	Activating signal cointegrator 1 complex subunit 3 OS=Homo sapiens OX=9606 GN=ASCC3 PE=1 SV=3	0	15	25	25	2202	0.027675	0.00138665	101.3	98.7
Q86X53	Glutamate-rich protein 1 OS=Homo sapiens OX=9606 GN=ERICH1 PE=1 SV=1	0	14	4	4	443	0.027675	4.29047e-05	95.6	104.4
Q16880	2-hydroxyacylsphingosine 1-beta-galactosyltransferase OS=Homo sapiens OX=9606 GN=UGT8 PE=2 SV=2	0	10	4	4	541	0.027675	0.000155649	91.5	108.5
Q00325-2	Isoform B of Phosphate carrier protein, mitochondrial OS=Homo sapiens OX=9606 GN=SLC25A3	0	30	8	8	361	0.027675	0.00179422	101.5	98.5
O00267	Transcription elongation factor SPT5 OS=Homo sapiens OX=9606 GN=SUPT5H PE=1 SV=1	0	11	8	8	1087	0.027675	4.29047e-05	96.8	103.2
Q86SX3	Tubulin epsilon and delta complex protein 1 OS=Homo sapiens OX=9606 GN=TEDC1 PE=1 SV=2	0	10	4	4	495	0.0291463	4.29047e-05	102.9	97.1
Q14145	Kelch-like ECH-associated protein 1 OS=Homo sapiens OX=9606 GN=KEAP1 PE=1 SV=2	0	6	3	3	624	0.0291463	4.29047e-05	103	97
P78357	Contactin-associated protein 1 OS=Homo sapiens OX=9606 GN=CNTNAP1 PE=1 SV=1	0	16	17	17	1384	0.0291463	0.00179422	98	102
O95292	Vesicle-associated membrane protein-associated protein B/C OS=Homo sapiens OX=9606 GN=VAPB PE=1 SV=3	0	34	6	5	243	0.0291463	0.00138665	97.5	102.5
M0QYN0	Myeloid-derived growth factor OS=Homo sapiens OX=9606 GN=MYDGF PE=1 SV=1	0	11	2	2	189	0.0291463	4.29047e-05	108.1	91.9
Q8NC60	Nitric oxide-associated protein 1 OS=Homo sapiens OX=9606 GN=NOA1 PE=1 SV=2	0	15	7	7	698	0.0306192	0.00179422	35.3	164.7
O95235	Kinesin-like protein KIF20A OS=Homo sapiens OX=9606 GN=KIF20A PE=1 SV=1	0	9	6	6	890	0.0306192	4.29047e-05	98.3	101.7
Q96S15	GATOR complex protein WDR24 OS=Homo sapiens OX=9606 GN=WDR24 PE=1 SV=2	0	5	3	3	790	0.0320936	4.29047e-05	96.1	103.9
Q8NEM7-3	Isoform 3 of Transcription factor SPT20 homolog OS=Homo sapiens OX=9606 GN=SUPT20H	0	13	7	7	811	0.0320936	0.00179422	96.5	103.5
Q5BKY9	Protein FAM133B OS=Homo sapiens OX=9606 GN=FAM133B PE=1 SV=1	0	9	1	1	247	0.0320936	4.29047e-05	98.9	101.1
Q15345	Leucine-rich repeat-containing protein 41 OS=Homo sapiens OX=9606 GN=LRRC41 PE=1 SV=3	0	6	4	4	812	0.0320936	4.29047e-05	101.5	98.5
P19388	DNA-directed RNA polymerases I, II, and III subunit RPABC1 OS=Homo sapiens OX=9606 GN=POLR2E PE=1 SV=4	0	36	5	5	210	0.0320936	0.00176684	99.4	100.6
E9PGC5	Receptor-type tyrosine-protein phosphatase kappa OS=Homo sapiens OX=9606 GN=PTPRK PE=1 SV=1	0	6	7	7	1472	0.0320936	0.000239336	107.7	92.3
Q9ULJ8-3	Isoform 3 of Neurabin-1 OS=Homo sapiens OX=9606 GN=PPP1R9A	0	9	7	7	1374	0.0335695	4.29047e-05	97.5	102.5
Q9BW92	Threonine--tRNA ligase, mitochondrial OS=Homo sapiens OX=9606 GN=TARS2 PE=1 SV=1	0	20	11	11	718	0.0335695	4.29047e-05	101.3	98.7
Q5SGD2	Protein phosphatase 1L OS=Homo sapiens OX=9606 GN=PPM1L PE=1 SV=1	0.003	9	2	2	360	0.0335695	4.29047e-05	100.5	99.5
P67775	Serine/threonine-protein phosphatase 2A catalytic subunit alpha isoform OS=Homo sapiens OX=9606 GN=PPP2CA PE=1 SV=1	0	24	5	5	309	0.0335695	0.000774744	98.6	101.4
P49458	Signal recognition particle 9 kDa protein OS=Homo sapiens OX=9606 GN=SRP9 PE=1 SV=2	0	22	2	2	86	0.0335695	0.00179422	101.9	98.1
P08195-4	Isoform 4 of 4F2 cell-surface antigen heavy chain OS=Homo sapiens OX=9606 GN=SLC3A2	0	14	7	7	661	0.0335695	4.29047e-05	102.1	97.9
P04844	Dolichyl-diphosphooligosaccharide--protein glycosyltransferase subunit 2 OS=Homo sapiens OX=9606 GN=RPN2 PE=1 SV=3	0	44	18	9	631	0.0335695	0.00179422	98.6	101.4
O75143-5	Isoform 5 of Autophagy-related protein 13 OS=Homo sapiens OX=9606 GN=ATG13	0	6	2	2	550	0.0335695	4.29047e-05	98.8	101.2
Q9UET6	Putative tRNA (cytidine(32)/guanosine(34)-2'-O)-methyltransferase OS=Homo sapiens OX=9606 GN=FTSJ1 PE=1 SV=2	0	13	3	3	329	0.0350469	4.29047e-05	96.8	103.2
Q9BRX2	Protein pelota homolog OS=Homo sapiens OX=9606 GN=PELO PE=1 SV=2	0	12	2	2	385	0.0350469	0.00234311	97.9	102.1
Q7L4I2	Arginine/serine-rich coiled-coil protein 2 OS=Homo sapiens OX=9606 GN=RSRC2 PE=1 SV=1	0	16	5	5	434	0.0350469	0.00179422	96.8	103.2
P07199	Major centromere autoantigen B OS=Homo sapiens OX=9606 GN=CENPB PE=1 SV=2	0	10	4	4	599	0.0350469	4.29047e-05	102	98
O15160	DNA-directed RNA polymerases I and III subunit RPAC1 OS=Homo sapiens OX=9606 GN=POLR1C PE=1 SV=1	0	33	7	7	346	0.0350469	0.00179422	100.6	99.4
H3BP20	Beta-hexosaminidase OS=Homo sapiens OX=9606 GN=HEXA PE=1 SV=1	0	31	13	12	540	0.0350469	4.29047e-05	97.2	102.8
Q96MG7	Non-structural maintenance of chromosomes element 3 homolog OS=Homo sapiens OX=9606 GN=NSMCE3 PE=1 SV=1	0	29	7	7	304	0.0365259	0.00167665	98.7	101.3
Q96DA6	Mitochondrial import inner membrane translocase subunit TIM14 OS=Homo sapiens OX=9606 GN=DNAJC19 PE=1 SV=3	0	13	2	2	116	0.0365259	0.000795659	98.1	101.9
Q86U06	Probable RNA-binding protein 23 OS=Homo sapiens OX=9606 GN=RBM23 PE=1 SV=1	0	21	7	5	439	0.0365259	4.29047e-05	96	104
Q5VWG9	Transcription initiation factor TFIID subunit 3 OS=Homo sapiens OX=9606 GN=TAF3 PE=1 SV=1	0	13	7	7	929	0.0365259	4.29047e-05	95.3	104.7
Q15678	Tyrosine-protein phosphatase non-receptor type 14 OS=Homo sapiens OX=9606 GN=PTPN14 PE=1 SV=2	0	5	4	4	1187	0.0365259	4.29047e-05	107	93
O00567	Nucleolar protein 56 OS=Homo sapiens OX=9606 GN=NOP56 PE=1 SV=4	0	42	16	16	594	0.0365259	0.00179422	97.3	102.7
K7ER00	Phenylalanine--tRNA ligase alpha subunit OS=Homo sapiens OX=9606 GN=FARSA PE=1 SV=1	0	9	4	4	548	0.0365259	0.000239336	97.9	102.1
Q9ULD9	Zinc finger protein 608 OS=Homo sapiens OX=9606 GN=ZNF608 PE=1 SV=4	0	16	16	16	1512	0.0380063	0.000239336	96.9	103.1
Q9P003	Protein cornichon homolog 4 OS=Homo sapiens OX=9606 GN=CNIH4 PE=1 SV=1	0	14	1	1	139	0.0380063	4.29047e-05	98.4	101.6
Q7Z4V5	Hepatoma-derived growth factor-related protein 2 OS=Homo sapiens OX=9606 GN=HDGFL2 PE=1 SV=1	0	21	9	8	671	0.0380063	0.00179422	97.6	102.4
O75179	Ankyrin repeat domain-containing protein 17 OS=Homo sapiens OX=9606 GN=ANKRD17 PE=1 SV=3	0	13	22	11	2603	0.0380063	4.29047e-05	100.9	99.1
O43395	U4/U6 small nuclear ribonucleoprotein Prp3 OS=Homo sapiens OX=9606 GN=PRPF3 PE=1 SV=2	0	43	19	19	683	0.0380063	0.00179422	100.3	99.7
B4DUA7	Intersex-like (Drosophila) OS=Homo sapiens OX=9606 GN=MED29 PE=1 SV=1	0	13	2	2	221	0.0380063	0.00168	94.2	105.8
A0A590UJN4	DNA-directed RNA polymerase II subunit RPB1 OS=Homo sapiens OX=9606 GN=POLR2A PE=4 SV=1	0	23	31	31	1970	0.0380063	4.29047e-05	97.3	102.7
Q53T94	TATA box-binding protein-associated factor RNA polymerase I subunit B OS=Homo sapiens OX=9606 GN=TAF1B PE=1 SV=1	0	6	2	2	588	0.0394883	0.00138665	99	101
Q14147	Probable ATP-dependent RNA helicase DHX34 OS=Homo sapiens OX=9606 GN=DHX34 PE=1 SV=2	0	13	10	10	1143	0.0394883	4.29047e-05	98.9	101.1
P13645	Keratin, type I cytoskeletal 10 OS=Homo sapiens OX=9606 GN=KRT10 PE=1 SV=6	0	43	17	15	584	0.0394883	0.00200618	101.7	98.3
O95299-2	Isoform 2 of NADH dehydrogenase [ubiquinone] 1 alpha subcomplex subunit 10, mitochondrial OS=Homo sapiens OX=9606 GN=NDUFA10	0	8	2	2	429	0.0394883	0.00179422	101.1	98.9
O14654	Insulin receptor substrate 4 OS=Homo sapiens OX=9606 GN=IRS4 PE=1 SV=1	0	32	25	25	1257	0.0394883	0.00217163	97.4	102.6
A0A499FI31	Squamous cell carcinoma antigen recognized by T-cells 3 OS=Homo sapiens OX=9606 GN=SART3 PE=1 SV=1	0	6	5	5	981	0.0394883	4.29047e-05	101.2	98.8
Q9NXL9	DNA helicase MCM9 OS=Homo sapiens OX=9606 GN=MCM9 PE=1 SV=4	0	11	9	9	1143	0.0409718	4.29047e-05	88.7	111.3
Q9H1E5	Thioredoxin-related transmembrane protein 4 OS=Homo sapiens OX=9606 GN=TMX4 PE=1 SV=1	0	11	3	3	349	0.0409718	0.000795659	98.6	101.4
Q13347	Eukaryotic translation initiation factor 3 subunit I OS=Homo sapiens OX=9606 GN=EIF3I PE=1 SV=1	0	7	2	2	325	0.0409718	0.00138665	96.8	103.2
P84098	60S ribosomal protein L19 OS=Homo sapiens OX=9606 GN=RPL19 PE=1 SV=1	0	9	1	1	196	0.0409718	4.29047e-05	98.6	101.4
P42702	Leukemia inhibitory factor receptor OS=Homo sapiens OX=9606 GN=LIFR PE=1 SV=1	0	14	12	12	1097	0.0409718	0.00129175	97.8	102.2
O95602	DNA-directed RNA polymerase I subunit RPA1 OS=Homo sapiens OX=9606 GN=POLR1A PE=1 SV=2	0	32	37	37	1720	0.0409718	0.00234311	102.1	97.9
Q9Y462-3	Isoform 3 of Zinc finger protein 711 OS=Homo sapiens OX=9606 GN=ZNF711	0	13	6	6	807	0.0424568	0.00167665	100.9	99.1
Q9NRL2	Bromodomain adjacent to zinc finger domain protein 1A OS=Homo sapiens OX=9606 GN=BAZ1A PE=1 SV=2	0	14	15	15	1556	0.0424568	4.29047e-05	100.9	99.1
Q9BYW2	Histone-lysine N-methyltransferase SETD2 OS=Homo sapiens OX=9606 GN=SETD2 PE=1 SV=3	0	16	30	30	2564	0.0424568	0.00236535	96.2	103.8
P24390	ER lumen protein-retaining receptor 1 OS=Homo sapiens OX=9606 GN=KDELR1 PE=1 SV=1	0	17	2	2	212	0.0424568	4.29047e-05	104.9	95.1
Q9P015	39S ribosomal protein L15, mitochondrial OS=Homo sapiens OX=9606 GN=MRPL15 PE=1 SV=1	0	30	7	7	296	0.0439433	4.29047e-05	104.4	95.6
Q9H0G5	Nuclear speckle splicing regulatory protein 1 OS=Homo sapiens OX=9606 GN=NSRP1 PE=1 SV=1	0	20	7	7	558	0.0439433	0.00277014	98.9	101.1
Q8N141	Zinc finger protein 82 homolog OS=Homo sapiens OX=9606 GN=ZFP82 PE=1 SV=1	0	9	4	4	532	0.0439433	4.29047e-05	100	100
Q8IY17	Neuropathy target esterase OS=Homo sapiens OX=9606 GN=PNPLA6 PE=1 SV=3	0	19	19	19	1375	0.0439433	4.29047e-05	95.4	104.6
Q86W92	Liprin-beta-1 OS=Homo sapiens OX=9606 GN=PPFIBP1 PE=1 SV=2	0	5	4	4	1011	0.0439433	0.00191375	100.8	99.2
Q5EBL8-2	Isoform 2 of PDZ domain-containing protein 11 OS=Homo sapiens OX=9606 GN=PDZD11	0	30	3	3	171	0.0439433	4.29047e-05	99.2	100.8
Q16594	Transcription initiation factor TFIID subunit 9 OS=Homo sapiens OX=9606 GN=TAF9 PE=1 SV=1	0	36	8	3	264	0.0439433	4.29047e-05	98.3	101.7
P54727	UV excision repair protein RAD23 homolog B OS=Homo sapiens OX=9606 GN=RAD23B PE=1 SV=1	0	17	4	4	409	0.0439433	0.000691414	97	103
O75976	Carboxypeptidase D OS=Homo sapiens OX=9606 GN=CPD PE=1 SV=2	0	21	21	21	1380	0.0439433	0.00264229	104.6	95.4
Q9UNA1	Rho GTPase-activating protein 26 OS=Homo sapiens OX=9606 GN=ARHGAP26 PE=1 SV=1	0	6	3	3	814	0.0454314	0.00202542	98.2	101.8
Q9UBV8	Peflin OS=Homo sapiens OX=9606 GN=PEF1 PE=1 SV=1	0	5	1	1	284	0.0454314	0.00179422	97	103
Q9H9B4	Sideroflexin-1 OS=Homo sapiens OX=9606 GN=SFXN1 PE=1 SV=4	0	39	9	9	322	0.0454314	4.29047e-05	97.6	102.4
Q9H488	GDP-fucose protein O-fucosyltransferase 1 OS=Homo sapiens OX=9606 GN=POFUT1 PE=1 SV=1	0	28	7	7	388	0.0454314	0.0032407	97.3	102.7
Q96HR3	Mediator of RNA polymerase II transcription subunit 30 OS=Homo sapiens OX=9606 GN=MED30 PE=1 SV=1	0	16	3	3	178	0.0454314	4.29047e-05	99.8	100.2
Q86VR2	Reticulophagy regulator 3 OS=Homo sapiens OX=9606 GN=RETREG3 PE=1 SV=1	0	11	3	3	466	0.0454314	0.00350144	96.8	103.2
Q15738	Sterol-4-alpha-carboxylate 3-dehydrogenase, decarboxylating OS=Homo sapiens OX=9606 GN=NSDHL PE=1 SV=2	0	25	6	6	373	0.0454314	4.29047e-05	97.7	102.3
P49454	Centromere protein F OS=Homo sapiens OX=9606 GN=CENPF PE=1 SV=3	0	10	24	24	3114	0.0454314	4.29047e-05	103.6	96.4
Q8NDZ4	Divergent protein kinase domain 2A OS=Homo sapiens OX=9606 GN=DIPK2A PE=1 SV=1	0	16	6	6	430	0.046921	4.29047e-05	104.2	95.8
Q8IXB1	DnaJ homolog subfamily C member 10 OS=Homo sapiens OX=9606 GN=DNAJC10 PE=1 SV=2	0	30	15	2	793	0.046921	0.00335707	99	101
Q86YT6	E3 ubiquitin-protein ligase MIB1 OS=Homo sapiens OX=9606 GN=MIB1 PE=1 SV=1	0	12	9	9	1006	0.046921	4.29047e-05	95.1	104.9
P07099	Epoxide hydrolase 1 OS=Homo sapiens OX=9606 GN=EPHX1 PE=1 SV=1	0	16	6	6	455	0.046921	0.000239336	97.2	102.8
O94992	Protein HEXIM1 OS=Homo sapiens OX=9606 GN=HEXIM1 PE=1 SV=1	0	20	5	5	359	0.046921	4.29047e-05	99.1	100.9
Q5JPE7	Nodal modulator 2 OS=Homo sapiens OX=9606 GN=NOMO2 PE=1 SV=1	0	45	34	34	1267	0.0484122	0.00411329	99.8	100.2
Q9P258	Protein RCC2 OS=Homo sapiens OX=9606 GN=RCC2 PE=1 SV=2	0	57	19	19	522	0.0484122	0.00438797	97.2	102.8
Q9H981	Actin-related protein 8 OS=Homo sapiens OX=9606 GN=ACTR8 PE=1 SV=2	0	18	7	7	624	0.0484122	0.00236535	85.2	114.8
P12273	Prolactin-inducible protein OS=Homo sapiens OX=9606 GN=PIP PE=1 SV=1	0	16	2	2	146	0.0484122	0.00179422	98.3	101.7
O94901-9	Isoform 9 of SUN domain-containing protein 1 OS=Homo sapiens OX=9606 GN=SUN1	0	25	16	16	916	0.0484122	4.29047e-05	97	103
X5CMH5	Antigen peptide transporter 2 OS=Homo sapiens OX=9606 GN=TAP2 PE=1 SV=1	0	11	5	5	703	0.0499049	4.29047e-05	101.5	98.5
Q9UL03	Integrator complex subunit 6 OS=Homo sapiens OX=9606 GN=INTS6 PE=1 SV=1	0	10	6	6	887	0.0499049	0.0032407	99.6	100.4
Q9BXS6	Nucleolar and spindle-associated protein 1 OS=Homo sapiens OX=9606 GN=NUSAP1 PE=1 SV=1	0	20	7	7	441	0.0499049	4.29047e-05	91.7	108.3
Q8IV08	Phospholipase D3 OS=Homo sapiens OX=9606 GN=PLD3 PE=1 SV=1	0	25	8	8	490	0.0499049	4.29047e-05	99.2	100.8
Q06830	Peroxiredoxin-1 OS=Homo sapiens OX=9606 GN=PRDX1 PE=1 SV=1	0	20	4	1	199	0.0499049	0.00268274	82.8	117.2
Q12931	Heat shock protein 75 kDa, mitochondrial OS=Homo sapiens OX=9606 GN=TRAP1 PE=1 SV=3	0	19	10	9	704	0.0513992	0.00234311	99.2	100.8
Q9UM54-6	Isoform 6 of Unconventional myosin-VI OS=Homo sapiens OX=9606 GN=MYO6	0	10	9	9	1285	0.0513992	0.000239336	98.2	101.8
Q9UHX1-5	Isoform 5 of Poly(U)-binding-splicing factor PUF60 OS=Homo sapiens OX=9606 GN=PUF60	0	58	21	2	530	0.0513992	0.000239336	87.5	112.5
Q9NSY1	BMP-2-inducible protein kinase OS=Homo sapiens OX=9606 GN=BMP2K PE=1 SV=2	0	8	6	6	1161	0.0513992	0.00217163	100.5	99.5
Q92673	Sortilin-related receptor OS=Homo sapiens OX=9606 GN=SORL1 PE=1 SV=2	0	5	9	9	2214	0.0513992	0.00217163	98.3	101.7
P50750-2	Isoform 2 of Cyclin-dependent kinase 9 OS=Homo sapiens OX=9606 GN=CDK9	0	24	9	7	489	0.0513992	4.29047e-05	97.6	102.4
Q9H490	Phosphatidylinositol glycan anchor biosynthesis class U protein OS=Homo sapiens OX=9606 GN=PIGU PE=1 SV=3	0	6	2	2	435	0.0528949	0.00335707	96.9	103.1
Q9BW19	Kinesin-like protein KIFC1 OS=Homo sapiens OX=9606 GN=KIFC1 PE=1 SV=2	0	32	14	14	673	0.0528949	0.00526822	95.6	104.4
Q6NUQ4	Transmembrane protein 214 OS=Homo sapiens OX=9606 GN=TMEM214 PE=1 SV=2	0	12	6	6	689	0.0528949	0.00179422	106.2	93.8
Q15154-5	Isoform 5 of Pericentriolar material 1 protein OS=Homo sapiens OX=9606 GN=PCM1	0	26	38	1	2016	0.0528949	0.00526822	96.4	103.6
P32119	Peroxiredoxin-2 OS=Homo sapiens OX=9606 GN=PRDX2 PE=1 SV=5	0	14	2	1	198	0.0528949	0.00234311	98.2	101.8
P17482	Homeobox protein Hox-B9 OS=Homo sapiens OX=9606 GN=HOXB9 PE=1 SV=2	0.001	6	1	1	250	0.0528949	0.00494674	96.9	103.1
Q8IWA0	WD repeat-containing protein 75 OS=Homo sapiens OX=9606 GN=WDR75 PE=1 SV=1	0	17	12	12	830	0.0543923	0.000239336	98.3	101.7
P0CG40	Transcription factor Sp9 OS=Homo sapiens OX=9606 GN=SP9 PE=3 SV=1	0	16	4	4	484	0.0543923	0.00350144	96.5	103.5
O14776	Transcription elongation regulator 1 OS=Homo sapiens OX=9606 GN=TCERG1 PE=1 SV=2	0	20	23	23	1098	0.0543923	0.00526822	99	101
Q9Y3E1	Hepatoma-derived growth factor-related protein 3 OS=Homo sapiens OX=9606 GN=HDGFL3 PE=1 SV=1	0	24	3	2	203	0.0558912	0.00316942	99.6	100.4
Q9BUN8	Derlin-1 OS=Homo sapiens OX=9606 GN=DERL1 PE=1 SV=1	0	19	4	4	251	0.0558912	0.00526822	103	97
Q99496	E3 ubiquitin-protein ligase RING2 OS=Homo sapiens OX=9606 GN=RNF2 PE=1 SV=1	0	25	6	4	336	0.0558912	0.000239336	95.5	104.5
Q92643	GPI-anchor transamidase OS=Homo sapiens OX=9606 GN=PIGK PE=1 SV=2	0	24	8	8	395	0.0558912	0.000795659	95.7	104.3
Q6IN84	rRNA methyltransferase 1, mitochondrial OS=Homo sapiens OX=9606 GN=MRM1 PE=1 SV=1	0	8	2	2	353	0.0558912	0.0032407	98.1	101.9
Q3B726	DNA-directed RNA polymerase I subunit RPA43 OS=Homo sapiens OX=9606 GN=TWISTNB PE=1 SV=1	0	14	4	4	338	0.0558912	0.00163661	100.1	99.9
P61803	Dolichyl-diphosphooligosaccharide--protein glycosyltransferase subunit DAD1 OS=Homo sapiens OX=9606 GN=DAD1 PE=1 SV=3	0	19	2	2	113	0.0558912	4.29047e-05	97.5	102.5
P31483	Nucleolysin TIA-1 isoform p40 OS=Homo sapiens OX=9606 GN=TIA1 PE=1 SV=3	0	13	4	2	386	0.0558912	0.0040385	97.7	102.3
Q8TEM1	Nuclear pore membrane glycoprotein 210 OS=Homo sapiens OX=9606 GN=NUP210 PE=1 SV=3	0	25	32	32	1887	0.0573917	0.00569828	97.3	102.7
Q8N5I2	Arrestin domain-containing protein 1 OS=Homo sapiens OX=9606 GN=ARRDC1 PE=1 SV=1	0	8	3	3	433	0.0573917	0.00168	98	102
Q8IY18	Structural maintenance of chromosomes protein 5 OS=Homo sapiens OX=9606 GN=SMC5 PE=1 SV=2	0	20	17	17	1101	0.0573917	4.29047e-05	97	103
Q16643-3	Isoform 3 of Drebrin OS=Homo sapiens OX=9606 GN=DBN1	0	12	5	5	695	0.0573917	0.00236535	86	114
Q12797	Aspartyl/asparaginyl beta-hydroxylase OS=Homo sapiens OX=9606 GN=ASPH PE=1 SV=3	0	28	17	17	758	0.0573917	0.00535755	95.3	104.7
Q02241	Kinesin-like protein KIF23 OS=Homo sapiens OX=9606 GN=KIF23 PE=1 SV=3	0	25	17	1	960	0.0573917	0.000795659	92.6	107.4
O15235	28S ribosomal protein S12, mitochondrial OS=Homo sapiens OX=9606 GN=MRPS12 PE=1 SV=1	0	25	2	2	138	0.0573917	0.00179422	97.7	102.3
O14965	Aurora kinase A OS=Homo sapiens OX=9606 GN=AURKA PE=1 SV=2	0	24	7	6	403	0.0573917	0.00231072	85.2	114.8
Q9Y6A4	Cilia- and flagella-associated protein 20 OS=Homo sapiens OX=9606 GN=CFAP20 PE=1 SV=1	0	37	6	6	193	0.0588937	0.00605605	101.4	98.6
Q92610	Zinc finger protein 592 OS=Homo sapiens OX=9606 GN=ZNF592 PE=1 SV=2	0	23	17	17	1267	0.0588937	4.29047e-05	99.8	100.2
Q7L3T8	Probable proline--tRNA ligase, mitochondrial OS=Homo sapiens OX=9606 GN=PARS2 PE=1 SV=1	0	8	2	2	475	0.0588937	0.00681627	103.3	96.7
Q9NZJ5	Eukaryotic translation initiation factor 2-alpha kinase 3 OS=Homo sapiens OX=9606 GN=EIF2AK3 PE=1 SV=3	0	9	7	7	1116	0.0603973	0.00179422	99.6	100.4
Q8WUY8	N-acetyltransferase 14 OS=Homo sapiens OX=9606 GN=NAT14 PE=1 SV=1	0	19	2	2	206	0.0603973	0.00519281	97.9	102.1
O94864	STAGA complex 65 subunit gamma OS=Homo sapiens OX=9606 GN=SUPT7L PE=1 SV=1	0	12	4	4	414	0.0603973	0.000798238	97.8	102.2
Q96LT9	RNA-binding region-containing protein 3 OS=Homo sapiens OX=9606 GN=RNPC3 PE=1 SV=1	0	22	8	1	517	0.0619024	0.00681627	101.8	98.2
Q96GM8	Target of EGR1 protein 1 OS=Homo sapiens OX=9606 GN=TOE1 PE=1 SV=1	0	29	11	11	510	0.0619024	0.00179422	97.3	102.7
Q6SPF0	Atherin OS=Homo sapiens OX=9606 GN=SAMD1 PE=1 SV=1	0	14	5	5	538	0.0619024	0.00176684	93.4	106.6
Q5SRN5	HLA class I histocompatibility antigen, A alpha chain OS=Homo sapiens OX=9606 GN=HLA-A PE=1 SV=2	0	40	11	7	371	0.0619024	0.00681627	98.5	101.5
Q06136	3-ketodihydrosphingosine reductase OS=Homo sapiens OX=9606 GN=KDSR PE=1 SV=1	0	18	4	4	332	0.0619024	0.00526822	98.4	101.6
P53618	Coatomer subunit beta OS=Homo sapiens OX=9606 GN=COPB1 PE=1 SV=3	0	5	4	4	953	0.0619024	0.00526822	112.9	87.1
A0A0C4DFX9	Negative elongation factor A OS=Homo sapiens OX=9606 GN=NELFA PE=1 SV=1	0	5	2	2	539	0.0619024	0.00494674	108.8	91.2
A0A140T9T7	Antigen peptide transporter 1 OS=Homo sapiens OX=9606 GN=TAP1 PE=1 SV=1	0	24	11	11	808	0.0634092	0.00234311	97.9	102.1
Q9Y512	Sorting and assembly machinery component 50 homolog OS=Homo sapiens OX=9606 GN=SAMM50 PE=1 SV=3	0	22	9	9	469	0.0649175	0.00179422	88.2	111.8
Q9H583	HEAT repeat-containing protein 1 OS=Homo sapiens OX=9606 GN=HEATR1 PE=1 SV=3	0	17	26	26	2144	0.0649175	0.00681627	105.4	94.6
Q86X29	Lipolysis-stimulated lipoprotein receptor OS=Homo sapiens OX=9606 GN=LSR PE=1 SV=4	0	10	4	4	649	0.0649175	0.00524004	95.9	104.1
P52434	DNA-directed RNA polymerases I, II, and III subunit RPABC3 OS=Homo sapiens OX=9606 GN=POLR2H PE=1 SV=4	0	57	6	6	150	0.0649175	0.00179422	96.6	103.4
P48167	Glycine receptor subunit beta OS=Homo sapiens OX=9606 GN=GLRB PE=1 SV=1	0	8	3	3	497	0.0649175	0.00494674	132.1	67.9
P04406	Glyceraldehyde-3-phosphate dehydrogenase OS=Homo sapiens OX=9606 GN=GAPDH PE=1 SV=3	0	26	4	4	335	0.0649175	0.00526822	123	77
O94762	ATP-dependent DNA helicase Q5 OS=Homo sapiens OX=9606 GN=RECQL5 PE=1 SV=2	0	19	13	13	991	0.0649175	0.00179422	95.4	104.6
O43303	Centriolar coiled-coil protein of 110 kDa OS=Homo sapiens OX=9606 GN=CCP110 PE=1 SV=3	0	7	6	6	1012	0.0649175	0.00681627	93.1	106.9
O00165-2	Isoform 2 of HCLS1-associated protein X-1 OS=Homo sapiens OX=9606 GN=HAX1	0	33	6	6	287	0.0649175	0.0032407	97.1	102.9
H0Y5K5	Endoplasmic reticulum-Golgi intermediate compartment protein 3 (Fragment) OS=Homo sapiens OX=9606 GN=ERGIC3 PE=1 SV=1	0	16	4	4	397	0.0649175	0.00519281	98.4	101.6
Q15287	RNA-binding protein with serine-rich domain 1 OS=Homo sapiens OX=9606 GN=RNPS1 PE=1 SV=1	0	23	5	5	305	0.0664274	0.00681627	94.9	105.1
Q14527	Helicase-like transcription factor OS=Homo sapiens OX=9606 GN=HLTF PE=1 SV=2	0	20	15	15	1009	0.0664274	0.00176684	100.7	99.3
Q14469	Transcription factor HES-1 OS=Homo sapiens OX=9606 GN=HES1 PE=1 SV=1	0	13	2	2	280	0.0664274	0.00494674	96.8	103.2
Q13011	Delta(3,5)-Delta(2,4)-dienoyl-CoA isomerase, mitochondrial OS=Homo sapiens OX=9606 GN=ECH1 PE=1 SV=2	0	19	5	5	328	0.0664274	0.00494674	96.9	103.1
O75530-2	Isoform 2 of Polycomb protein EED OS=Homo sapiens OX=9606 GN=EED	0	16	6	6	466	0.0664274	0.00179422	98	102
O14773	Tripeptidyl-peptidase 1 OS=Homo sapiens OX=9606 GN=TPP1 PE=1 SV=2	0	6	2	2	563	0.0664274	0.00569828	122.1	77.9
Q9H7L9	Sin3 histone deacetylase corepressor complex component SDS3 OS=Homo sapiens OX=9606 GN=SUDS3 PE=1 SV=2	0	22	5	5	328	0.0679388	0.00234311	96.9	103.1
Q96C36	Pyrroline-5-carboxylate reductase 2 OS=Homo sapiens OX=9606 GN=PYCR2 PE=1 SV=1	0	17	4	4	320	0.0679388	0.00526822	96	104
P51530	DNA replication ATP-dependent helicase/nuclease DNA2 OS=Homo sapiens OX=9606 GN=DNA2 PE=1 SV=3	0	13	10	10	1060	0.0679388	0.00470313	94.8	105.2
P43251-2	Isoform 2 of Biotinidase OS=Homo sapiens OX=9606 GN=BTD	0	6	2	2	545	0.0679388	0.0032407	98.9	101.1
O94913	Pre-mRNA cleavage complex 2 protein Pcf11 OS=Homo sapiens OX=9606 GN=PCF11 PE=1 SV=3	0	17	20	20	1555	0.0679388	0.00681627	100.4	99.6
Q8N0V3	Putative ribosome-binding factor A, mitochondrial OS=Homo sapiens OX=9606 GN=RBFA PE=1 SV=3	0	23	5	5	343	0.0694519	0.00569828	93.9	106.1
P26373	60S ribosomal protein L13 OS=Homo sapiens OX=9606 GN=RPL13 PE=1 SV=4	0	23	6	6	211	0.0694519	0.00681627	98.7	101.3
Q9NWV8	BRISC and BRCA1-A complex member 1 OS=Homo sapiens OX=9606 GN=BABAM1 PE=1 SV=1	0	29	6	6	329	0.0709665	0.00681627	96.7	103.3
Q96NB2	Sideroflexin-2 OS=Homo sapiens OX=9606 GN=SFXN2 PE=1 SV=2	0	10	2	2	322	0.0709665	0.00494674	101.4	98.6
Q6PIY7	Poly(A) RNA polymerase GLD2 OS=Homo sapiens OX=9606 GN=TENT2 PE=1 SV=1	0	10	4	4	484	0.0709665	0.00857885	93.1	106.9
P62913	60S ribosomal protein L11 OS=Homo sapiens OX=9606 GN=RPL11 PE=1 SV=2	0	20	3	3	178	0.0709665	0.00681627	99.4	100.6
J3KNF5	Centrosomal protein of 290 kDa OS=Homo sapiens OX=9606 GN=CEP290 PE=1 SV=1	0	13	25	25	2481	0.0709665	0.00217163	90.8	109.2
Q9Y2U8	Inner nuclear membrane protein Man1 OS=Homo sapiens OX=9606 GN=LEMD3 PE=1 SV=2	0	38	20	20	911	0.0724828	0.0032407	96.5	103.5
Q9GZS1	DNA-directed RNA polymerase I subunit RPA49 OS=Homo sapiens OX=9606 GN=POLR1E PE=1 SV=3	0	30	7	7	419	0.0724828	0.00200618	96	104
Q96KC8	DnaJ homolog subfamily C member 1 OS=Homo sapiens OX=9606 GN=DNAJC1 PE=1 SV=1	0	16	6	6	554	0.0724828	0.00179422	105	95
Q8IZD2	Inactive histone-lysine N-methyltransferase 2E OS=Homo sapiens OX=9606 GN=KMT2E PE=1 SV=1	0	6	8	7	1858	0.0724828	0.00681627	99.7	100.3
Q7Z7M0	Multiple epidermal growth factor-like domains protein 8 OS=Homo sapiens OX=9606 GN=MEGF8 PE=1 SV=2	0	11	17	17	2845	0.0724828	0.00202542	99	101
O96008	Mitochondrial import receptor subunit TOM40 homolog OS=Homo sapiens OX=9606 GN=TOMM40 PE=1 SV=1	0	17	3	3	361	0.0724828	0.00526822	97.5	102.5
O60563	Cyclin-T1 OS=Homo sapiens OX=9606 GN=CCNT1 PE=1 SV=1	0	17	7	6	726	0.0724828	0.00234311	95.9	104.1
Q96G25-2	Isoform 2 of Mediator of RNA polymerase II transcription subunit 8 OS=Homo sapiens OX=9606 GN=MED8	0	20	4	4	301	0.0740006	0.00236535	98.7	101.3
Q8NDT2	Putative RNA-binding protein 15B OS=Homo sapiens OX=9606 GN=RBM15B PE=1 SV=3	0	13	9	8	890	0.0740006	0.00274788	99.9	100.1
Q15269	Periodic tryptophan protein 2 homolog OS=Homo sapiens OX=9606 GN=PWP2 PE=2 SV=2	0	15	9	9	919	0.0740006	0.0032407	96	104
P47755	F-actin-capping protein subunit alpha-2 OS=Homo sapiens OX=9606 GN=CAPZA2 PE=1 SV=3	0	18	3	3	286	0.0740006	0.00681627	100.1	99.9
P28799	Progranulin OS=Homo sapiens OX=9606 GN=GRN PE=1 SV=2	0	12	3	3	593	0.0740006	0.00526822	98.3	101.7
H7BYT1	Casein kinase I isoform delta OS=Homo sapiens OX=9606 GN=CSNK1D PE=1 SV=2	0	15	5	1	427	0.0740006	0.00663698	97.4	102.6
Q9Y2H6	Fibronectin type-III domain-containing protein 3A OS=Homo sapiens OX=9606 GN=FNDC3A PE=1 SV=4	0	12	10	10	1198	0.07552	0.00663698	94.8	105.2
Q96N67	Dedicator of cytokinesis protein 7 OS=Homo sapiens OX=9606 GN=DOCK7 PE=1 SV=4	0	11	16	16	2140	0.07552	0.00526822	95.5	104.5
P46977	Dolichyl-diphosphooligosaccharide--protein glycosyltransferase subunit STT3A OS=Homo sapiens OX=9606 GN=STT3A PE=1 SV=2	0	13	10	8	705	0.07552	0.00861078	99.1	100.9
Q6DKI1	60S ribosomal protein L7-like 1 OS=Homo sapiens OX=9606 GN=RPL7L1 PE=1 SV=2	0	13	3	3	255	0.077041	0.00663698	97	103
P54886	Delta-1-pyrroline-5-carboxylate synthase OS=Homo sapiens OX=9606 GN=ALDH18A1 PE=1 SV=2	0	9	6	6	795	0.077041	0.00681627	99.1	100.9
P17612	cAMP-dependent protein kinase catalytic subunit alpha OS=Homo sapiens OX=9606 GN=PRKACA PE=1 SV=2	0	29	6	6	351	0.077041	0.00735236	97.7	102.3
O60716	Catenin delta-1 OS=Homo sapiens OX=9606 GN=CTNND1 PE=1 SV=1	0	12	7	7	968	0.077041	0.00681627	96.6	103.4
Q8N3X1-2	Isoform 2 of Formin-binding protein 4 OS=Homo sapiens OX=9606 GN=FNBP4	0	16	11	11	1019	0.0785637	0.00236535	97.8	102.2
Q6UXM1	Leucine-rich repeats and immunoglobulin-like domains protein 3 OS=Homo sapiens OX=9606 GN=LRIG3 PE=2 SV=1	0	16	13	11	1119	0.0785637	0.00526822	95.5	104.5
Q5QJE6	Deoxynucleotidyltransferase terminal-interacting protein 2 OS=Homo sapiens OX=9606 GN=DNTTIP2 PE=1 SV=2	0	12	7	7	756	0.0785637	0.00677611	97.2	102.8
P22695	Cytochrome b-c1 complex subunit 2, mitochondrial OS=Homo sapiens OX=9606 GN=UQCRC2 PE=1 SV=3	0	29	8	8	453	0.0785637	0.0032407	96.1	103.9
O95476	CTD nuclear envelope phosphatase 1 OS=Homo sapiens OX=9606 GN=CTDNEP1 PE=1 SV=2	0.002	5	1	1	244	0.0785637	0.00861078	99.6	100.4
O75882	Attractin OS=Homo sapiens OX=9606 GN=ATRN PE=1 SV=2	0	6	6	6	1429	0.0785637	0.00812934	99.8	100.2
O15371	Eukaryotic translation initiation factor 3 subunit D OS=Homo sapiens OX=9606 GN=EIF3D PE=1 SV=1	0	23	8	8	548	0.0785637	0.00376884	96.4	103.6
Q96GX1	Tectonic-2 OS=Homo sapiens OX=9606 GN=TCTN2 PE=2 SV=1	0	12	5	5	697	0.0800879	0.00681627	95.2	104.8
Q8N0Z8	tRNA pseudouridine synthase-like 1 OS=Homo sapiens OX=9606 GN=PUSL1 PE=1 SV=1	0	14	3	3	303	0.0800879	0.00681627	97.2	102.8
Q5VTL8	Pre-mRNA-splicing factor 38B OS=Homo sapiens OX=9606 GN=PRPF38B PE=1 SV=1	0	30	11	11	546	0.0800879	0.00922386	100.4	99.6
Q5RI15-2	Isoform 2 of Cytochrome c oxidase assembly protein COX20, mitochondrial OS=Homo sapiens OX=9606 GN=COX20	0	20	2	2	130	0.0800879	0.00681627	91.5	108.5
P35556	Fibrillin-2 OS=Homo sapiens OX=9606 GN=FBN2 PE=1 SV=3	0	19	35	35	2912	0.0800879	0.00938096	97.1	102.9
P28288	ATP-binding cassette sub-family D member 3 OS=Homo sapiens OX=9606 GN=ABCD3 PE=1 SV=1	0	27	14	14	659	0.0800879	0.0032407	94.2	105.8
O75528	Transcriptional adapter 3 OS=Homo sapiens OX=9606 GN=TADA3 PE=1 SV=1	0	29	9	9	432	0.0800879	0.00335707	99.5	100.5
Q9UPN3-5	Isoform 4 of Microtubule-actin cross-linking factor 1, isoforms 1/2/3/5 OS=Homo sapiens OX=9606 GN=MACF1	0	22	93	0	5938	0.0816138	0.00681627	91.3	108.7
Q9H0A0	RNA cytidine acetyltransferase OS=Homo sapiens OX=9606 GN=NAT10 PE=1 SV=2	0	20	16	16	1025	0.0816138	0.00486767	96.3	103.7
P15848	Arylsulfatase B OS=Homo sapiens OX=9606 GN=ARSB PE=1 SV=1	0	6	2	2	533	0.0816138	0.00681627	97.7	102.3
Q96GQ7	Probable ATP-dependent RNA helicase DDX27 OS=Homo sapiens OX=9606 GN=DDX27 PE=1 SV=2	0	15	10	10	796	0.0831412	0.00519281	92.4	107.6
Q8NBJ5	Procollagen galactosyltransferase 1 OS=Homo sapiens OX=9606 GN=COLGALT1 PE=1 SV=1	0	32	17	17	622	0.0831412	0.0104655	93.7	106.3
Q86XZ4	Spermatogenesis-associated serine-rich protein 2 OS=Homo sapiens OX=9606 GN=SPATS2 PE=1 SV=1	0	9	3	3	545	0.0831412	0.00681627	98.3	101.7
Q63HK5	Teashirt homolog 3 OS=Homo sapiens OX=9606 GN=TSHZ3 PE=1 SV=2	0	5	4	4	1081	0.0831412	0.0104655	97.8	102.2
O43292	Glycosylphosphatidylinositol anchor attachment 1 protein OS=Homo sapiens OX=9606 GN=GPAA1 PE=1 SV=3	0	9	5	5	621	0.0831412	0.00735236	98.3	101.7
J3KR72	Transcription initiation factor TFIID subunit 6 OS=Homo sapiens OX=9606 GN=TAF6 PE=1 SV=1	0	37	20	20	734	0.0831412	0.0104655	98.8	101.2
Q9NUQ6-3	Isoform 3 of SPATS2-like protein OS=Homo sapiens OX=9606 GN=SPATS2L	0	9	5	5	588	0.0846703	0.00681627	97.3	102.7
Q96F63	Coiled-coil domain-containing protein 97 OS=Homo sapiens OX=9606 GN=CCDC97 PE=1 SV=1	0	13	3	3	343	0.0846703	0.00681627	107.6	92.4
Q6WCQ1-2	Isoform 2 of Myosin phosphatase Rho-interacting protein OS=Homo sapiens OX=9606 GN=MPRIP	0	22	18	18	1038	0.0846703	0.00526822	95	105
Q15904	V-type proton ATPase subunit S1 OS=Homo sapiens OX=9606 GN=ATP6AP1 PE=1 SV=2	0	15	6	6	470	0.0846703	0.00681627	93.1	106.9
Q14257-2	Isoform 2 of Reticulocalbin-2 OS=Homo sapiens OX=9606 GN=RCN2	0	49	11	11	335	0.0846703	0.0104655	100.6	99.4
Q9UPN4-2	Isoform 2 of Centrosomal protein of 131 kDa OS=Homo sapiens OX=9606 GN=CEP131	0	23	16	16	1080	0.086201	0.00526822	95.6	104.4
Q8TAF3	WD repeat-containing protein 48 OS=Homo sapiens OX=9606 GN=WDR48 PE=1 SV=1	0	10	5	5	677	0.086201	0.00663698	97.7	102.3
Q8IWS0	PHD finger protein 6 OS=Homo sapiens OX=9606 GN=PHF6 PE=1 SV=1	0	22	6	1	365	0.086201	0.00526822	96.5	103.5
P40429	60S ribosomal protein L13a OS=Homo sapiens OX=9606 GN=RPL13A PE=1 SV=2	0	21	4	4	203	0.086201	0.00663698	90.5	109.5
O95347	Structural maintenance of chromosomes protein 2 OS=Homo sapiens OX=9606 GN=SMC2 PE=1 SV=2	0	12	13	13	1197	0.086201	0.00526822	96.7	103.3
H7C2Q8	EBNA1 binding protein 2, isoform CRA_d OS=Homo sapiens OX=9606 GN=EBNA1BP2 PE=1 SV=1	0	26	7	7	361	0.086201	0.00681627	93.8	106.2
Q9UM13	Anaphase-promoting complex subunit 10 OS=Homo sapiens OX=9606 GN=ANAPC10 PE=1 SV=1	0.001	6	1	1	185	0.0877334	0.00681627	100.2	99.8
Q9ULW0	Targeting protein for Xklp2 OS=Homo sapiens OX=9606 GN=TPX2 PE=1 SV=2	0	26	15	15	747	0.0877334	0.00635796	95.5	104.5
Q9P016	Thymocyte nuclear protein 1 OS=Homo sapiens OX=9606 GN=THYN1 PE=1 SV=1	0	12	3	3	225	0.0877334	0.0104655	96.6	103.4
Q9NXX6	Non-structural maintenance of chromosomes element 4 homolog A OS=Homo sapiens OX=9606 GN=NSMCE4A PE=1 SV=2	0	23	6	6	385	0.0877334	0.00519281	94.9	105.1
Q9BTX1	Nucleoporin NDC1 OS=Homo sapiens OX=9606 GN=NDC1 PE=1 SV=2	0	7	3	3	674	0.0877334	0.00681627	87.2	112.8
Q9BPX5	Actin-related protein 2/3 complex subunit 5-like protein OS=Homo sapiens OX=9606 GN=ARPC5L PE=1 SV=1	0.003	8	1	1	153	0.0877334	0.00861078	102.1	97.9
Q8NDV7	Trinucleotide repeat-containing gene 6A protein OS=Homo sapiens OX=9606 GN=TNRC6A PE=1 SV=2	0	8	10	10	1962	0.0877334	0.00681627	95	105
P61769	Beta-2-microglobulin OS=Homo sapiens OX=9606 GN=B2M PE=1 SV=1	0.001	18	1	1	119	0.0877334	0.00912679	96.9	103.1
P51116	Fragile X mental retardation syndrome-related protein 2 OS=Homo sapiens OX=9606 GN=FXR2 PE=1 SV=2	0	14	7	6	673	0.0877334	0.00681627	96.1	103.9
Q9UHG3	Prenylcysteine oxidase 1 OS=Homo sapiens OX=9606 GN=PCYOX1 PE=1 SV=3	0	25	11	11	505	0.0892673	0.00535755	95.1	104.9
Q9H0H5	Rac GTPase-activating protein 1 OS=Homo sapiens OX=9606 GN=RACGAP1 PE=1 SV=1	0	23	10	10	632	0.0892673	0.00526822	96.8	103.2
Q9H089	Large subunit GTPase 1 homolog OS=Homo sapiens OX=9606 GN=LSG1 PE=1 SV=2	0	31	15	15	658	0.0892673	0.00535755	95.8	104.2
P55072	Transitional endoplasmic reticulum ATPase OS=Homo sapiens OX=9606 GN=VCP PE=1 SV=4	0	53	28	28	806	0.0892673	0.0111296	97.3	102.7
P07900-2	Isoform 2 of Heat shock protein HSP 90-alpha OS=Homo sapiens OX=9606 GN=HSP90AA1	0	15	9	3	854	0.0892673	0.00861078	102	98
O75821	Eukaryotic translation initiation factor 3 subunit G OS=Homo sapiens OX=9606 GN=EIF3G PE=1 SV=2	0	13	3	3	320	0.0892673	0.00681627	96.8	103.2
J3QQ67	60S ribosomal protein L18 (Fragment) OS=Homo sapiens OX=9606 GN=RPL18 PE=1 SV=1	0	25	4	4	190	0.0892673	0.0111296	93.4	106.6
Q9NS00	Glycoprotein-N-acetylgalactosamine 3-beta-galactosyltransferase 1 OS=Homo sapiens OX=9606 GN=C1GALT1 PE=1 SV=1	0	6	2	2	363	0.0908029	0.00681627	96.8	103.2
Q99805	Transmembrane 9 superfamily member 2 OS=Homo sapiens OX=9606 GN=TM9SF2 PE=1 SV=1	0	15	7	7	663	0.0908029	0.00677611	97.6	102.4
Q96ES7	SAGA-associated factor 29 OS=Homo sapiens OX=9606 GN=SGF29 PE=1 SV=1	0	28	6	6	293	0.0908029	0.00663698	98.4	101.6
Q9ULW3	Activator of basal transcription 1 OS=Homo sapiens OX=9606 GN=ABT1 PE=1 SV=1	0	27	5	5	272	0.0923402	0.00744082	96.5	103.5
Q9P2L0	WD repeat-containing protein 35 OS=Homo sapiens OX=9606 GN=WDR35 PE=1 SV=3	0	5	4	4	1181	0.0923402	0.0104655	98.4	101.6
Q13576	Ras GTPase-activating-like protein IQGAP2 OS=Homo sapiens OX=9606 GN=IQGAP2 PE=1 SV=4	0	15	19	18	1575	0.0923402	0.00681627	92.5	107.5
Q13445	Transmembrane emp24 domain-containing protein 1 OS=Homo sapiens OX=9606 GN=TMED1 PE=1 SV=1	0	17	3	3	227	0.0923402	0.00922386	95.7	104.3
Q9UJK0	Ribosome biogenesis protein TSR3 homolog OS=Homo sapiens OX=9606 GN=TSR3 PE=1 SV=1	0	9	2	2	312	0.093879	0.0104655	93	107
Q9P2R6	Arginine-glutamic acid dipeptide repeats protein OS=Homo sapiens OX=9606 GN=RERE PE=1 SV=2	0	10	9	9	1566	0.093879	0.00681627	99.7	100.3
Q9P0U4-2	Isoform 2 of CXXC-type zinc finger protein 1 OS=Homo sapiens OX=9606 GN=CXXC1	0	7	4	4	660	0.093879	0.0111296	96.5	103.5
Q9NZM5	Ribosome biogenesis protein NOP53 OS=Homo sapiens OX=9606 GN=NOP53 PE=1 SV=2	0	15	5	5	478	0.093879	0.00681627	97.7	102.3
P30876	DNA-directed RNA polymerase II subunit RPB2 OS=Homo sapiens OX=9606 GN=POLR2B PE=1 SV=1	0	29	22	22	1174	0.093879	0.00519281	95.4	104.6
P11182	Lipoamide acyltransferase component of branched-chain alpha-keto acid dehydrogenase complex, mitochondrial OS=Homo sapiens OX=9606 GN=DBT PE=1 SV=3	0	45	15	15	482	0.093879	0.0121716	102.2	97.8
P05141	ADP/ATP translocase 2 OS=Homo sapiens OX=9606 GN=SLC25A5 PE=1 SV=7	0	17	5	1	298	0.093879	0.0104655	96.7	103.3
P02533	Keratin, type I cytoskeletal 14 OS=Homo sapiens OX=9606 GN=KRT14 PE=1 SV=4	0	32	12	6	472	0.093879	0.00570402	102.8	97.2
F8VYN9	ADP-ribosylation factor-like protein 1 OS=Homo sapiens OX=9606 GN=ARL1 PE=1 SV=1	0.004	6	1	1	194	0.093879	0.00681627	99.4	100.6
Q9UBQ5	Eukaryotic translation initiation factor 3 subunit K OS=Homo sapiens OX=9606 GN=EIF3K PE=1 SV=1	0.006	5	1	1	218	0.0954196	0.00861078	106.7	93.3
Q9UBB9	Tuftelin-interacting protein 11 OS=Homo sapiens OX=9606 GN=TFIP11 PE=1 SV=1	0	51	33	33	837	0.0954196	0.0123211	95.8	104.2
Q96GD4-5	Isoform 5 of Aurora kinase B OS=Homo sapiens OX=9606 GN=AURKB	0	19	5	4	345	0.0954196	0.0117654	101.8	98.2
Q52LJ0	Protein FAM98B OS=Homo sapiens OX=9606 GN=FAM98B PE=1 SV=2	0	7	2	1	433	0.0954196	0.00856679	96.7	103.3
P60228	Eukaryotic translation initiation factor 3 subunit E OS=Homo sapiens OX=9606 GN=EIF3E PE=1 SV=1	0	11	4	4	445	0.0954196	0.0104655	99.6	100.4
Q9Y5J1	U3 small nucleolar RNA-associated protein 18 homolog OS=Homo sapiens OX=9606 GN=UTP18 PE=1 SV=3	0	12	5	5	556	0.0969617	0.0118656	101.9	98.1
Q9NZN8	CCR4-NOT transcription complex subunit 2 OS=Homo sapiens OX=9606 GN=CNOT2 PE=1 SV=1	0	5	2	2	540	0.0969617	0.0151589	99	101
Q9NQB0-11	Isoform 11 of Transcription factor 7-like 2 OS=Homo sapiens OX=9606 GN=TCF7L2	0	10	4	4	489	0.0969617	0.00681627	105.6	94.4
Q9H857-2	Isoform 2 of 5'-nucleotidase domain-containing protein 2 OS=Homo sapiens OX=9606 GN=NT5DC2	0	35	14	14	557	0.0969617	0.00681627	97.9	102.1
Q8NE71	ATP-binding cassette sub-family F member 1 OS=Homo sapiens OX=9606 GN=ABCF1 PE=1 SV=2	0	46	24	24	845	0.0969617	0.0134626	98.1	101.9
Q1MSJ5	Centrosome and spindle pole-associated protein 1 OS=Homo sapiens OX=9606 GN=CSPP1 PE=1 SV=4	0	9	8	8	1256	0.0969617	0.0118656	97.5	102.5
P21675-4	Isoform 4 of Transcription initiation factor TFIID subunit 1 OS=Homo sapiens OX=9606 GN=TAF1	0	13	19	19	1906	0.0969617	0.00663698	97.4	102.6
Q9UEG4	Zinc finger protein 629 OS=Homo sapiens OX=9606 GN=ZNF629 PE=1 SV=2	0	22	13	13	869	0.0985055	0.00681627	98.9	101.1
Q9BQ61	Telomerase RNA component interacting RNase OS=Homo sapiens OX=9606 GN=TRIR PE=1 SV=1	0	22	3	3	176	0.0985055	0.00681627	98.1	101.9
Q8TAE8	Growth arrest and DNA damage-inducible proteins-interacting protein 1 OS=Homo sapiens OX=9606 GN=GADD45GIP1 PE=1 SV=1	0	47	7	7	222	0.0985055	0.00681627	96.7	103.3
O60870	DNA/RNA-binding protein KIN17 OS=Homo sapiens OX=9606 GN=KIN PE=1 SV=2	0	7	2	2	393	0.0985055	0.0119213	96.6	103.4
A0A087WX23	Retrotransposon-derived protein PEG10 OS=Homo sapiens OX=9606 GN=PEG10 PE=1 SV=1	0	7	3	3	783	0.0985055	0.00861078	100.5	99.5
Q7LGA3	Heparan sulfate 2-O-sulfotransferase 1 OS=Homo sapiens OX=9606 GN=HS2ST1 PE=1 SV=1	0	27	8	8	356	0.100051	0.00681627	97.1	102.9
Q15599	Na(+)/H(+) exchange regulatory cofactor NHE-RF2 OS=Homo sapiens OX=9606 GN=SLC9A3R2 PE=1 SV=2	0	8	2	2	337	0.100051	0.0134626	96.6	103.4
P62937	Peptidyl-prolyl cis-trans isomerase A OS=Homo sapiens OX=9606 GN=PPIA PE=1 SV=2	0	21	3	3	165	0.100051	0.0104655	97.5	102.5
O75467	Zinc finger protein 324A OS=Homo sapiens OX=9606 GN=ZNF324 PE=2 SV=1	0	7	3	3	553	0.100051	0.00735236	90	110
O60264	SWI/SNF-related matrix-associated actin-dependent regulator of chromatin subfamily A member 5 OS=Homo sapiens OX=9606 GN=SMARCA5 PE=1 SV=1	0	25	26	19	1052	0.100051	0.0146748	93.3	106.7
A0A1W2PQ29	GPI transamidase component PIG-T OS=Homo sapiens OX=9606 GN=PIGT PE=1 SV=1	0	21	5	1	300	0.100051	0.00861078	102.9	97.1
A0A0A0MQS2	CLK4-associating serine/arginine-rich protein OS=Homo sapiens OX=9606 GN=CLASRP PE=1 SV=1	0	12	5	5	674	0.100051	0.00681627	77.6	122.4
Q9UHB9	Signal recognition particle subunit SRP68 OS=Homo sapiens OX=9606 GN=SRP68 PE=1 SV=2	0	14	7	7	627	0.103147	0.00681627	101.5	98.5
P51114	Fragile X mental retardation syndrome-related protein 1 OS=Homo sapiens OX=9606 GN=FXR1 PE=1 SV=3	0	19	8	7	621	0.103147	0.00735236	95.5	104.5
O95478	Ribosome biogenesis protein NSA2 homolog OS=Homo sapiens OX=9606 GN=NSA2 PE=1 SV=1	0	13	3	3	260	0.103147	0.00681627	98.7	101.3
O75787	Renin receptor OS=Homo sapiens OX=9606 GN=ATP6AP2 PE=1 SV=2	0	13	3	3	350	0.103147	0.0104655	95.1	104.9
Q9Y605	MORF4 family-associated protein 1 OS=Homo sapiens OX=9606 GN=MRFAP1 PE=1 SV=1	0	27	2	2	127	0.104697	0.0153482	96.4	103.6
Q15648	Mediator of RNA polymerase II transcription subunit 1 OS=Homo sapiens OX=9606 GN=MED1 PE=1 SV=4	0	29	29	29	1581	0.104697	0.0151589	96.4	103.6
P60604	Ubiquitin-conjugating enzyme E2 G2 OS=Homo sapiens OX=9606 GN=UBE2G2 PE=1 SV=1	0	42	4	4	165	0.104697	0.00681627	100	100
P42696	RNA-binding protein 34 OS=Homo sapiens OX=9606 GN=RBM34 PE=1 SV=2	0	13	5	5	430	0.104697	0.0111296	96	104
P42568	Protein AF-9 OS=Homo sapiens OX=9606 GN=MLLT3 PE=1 SV=2	0	12	4	4	568	0.104697	0.0108018	94.1	105.9
P42285	Exosome RNA helicase MTR4 OS=Homo sapiens OX=9606 GN=MTREX PE=1 SV=3	0	40	31	31	1042	0.104697	0.0151589	98.9	101.1
P19784	Casein kinase II subunit alpha' OS=Homo sapiens OX=9606 GN=CSNK2A2 PE=1 SV=1	0	50	12	11	350	0.104697	0.00812934	91.2	108.8
O95425	Supervillin OS=Homo sapiens OX=9606 GN=SVIL PE=1 SV=2	0	8	12	12	2214	0.104697	0.00681627	96.6	103.4
O95239	Chromosome-associated kinesin KIF4A OS=Homo sapiens OX=9606 GN=KIF4A PE=1 SV=3	0	8	8	8	1232	0.104697	0.0147255	89.1	110.9
O75940	Survival of motor neuron-related-splicing factor 30 OS=Homo sapiens OX=9606 GN=SMNDC1 PE=1 SV=1	0	34	4	4	238	0.104697	0.00735236	94.9	105.1
P60468	Protein transport protein Sec61 subunit beta OS=Homo sapiens OX=9606 GN=SEC61B PE=1 SV=2	0.001	10	1	1	96	0.106249	0.00681627	96.3	103.7
Q9HCE1	Helicase MOV-10 OS=Homo sapiens OX=9606 GN=MOV10 PE=1 SV=2	0	24	18	18	1003	0.106249	0.00681627	97.6	102.4
Q9H3N1	Thioredoxin-related transmembrane protein 1 OS=Homo sapiens OX=9606 GN=TMX1 PE=1 SV=1	0	30	9	9	280	0.106249	0.00681627	100.2	99.8
Q96Q89-2	Isoform 2 of Kinesin-like protein KIF20B OS=Homo sapiens OX=9606 GN=KIF20B	0	12	16	16	1853	0.106249	0.00856679	98.7	101.3
Q15365	Poly(rC)-binding protein 1 OS=Homo sapiens OX=9606 GN=PCBP1 PE=1 SV=2	0	74	14	12	356	0.106249	0.0151589	103.9	96.1
E9PAU2	Ribonucleoprotein PTB-binding 1 OS=Homo sapiens OX=9606 GN=RAVER1 PE=1 SV=1	0	27	12	12	756	0.106249	0.0104655	97.2	102.8
Q9HAZ2	Histone-lysine N-methyltransferase PRDM16 OS=Homo sapiens OX=9606 GN=PRDM16 PE=1 SV=3	0	10	9	5	1276	0.107803	0.0110045	98.2	101.8
Q12788	Transducin beta-like protein 3 OS=Homo sapiens OX=9606 GN=TBL3 PE=1 SV=2	0	29	16	16	808	0.107803	0.00861078	97.3	102.7
P13674	Prolyl 4-hydroxylase subunit alpha-1 OS=Homo sapiens OX=9606 GN=P4HA1 PE=1 SV=2	0	47	19	19	534	0.107803	0.0152249	97.4	102.6
Q9BZJ0	Crooked neck-like protein 1 OS=Homo sapiens OX=9606 GN=CRNKL1 PE=1 SV=4	0	23	18	18	848	0.109359	0.0152249	96.9	103.1
Q13555-6	Isoform 6 of Calcium/calmodulin-dependent protein kinase type II subunit gamma OS=Homo sapiens OX=9606 GN=CAMK2G	0	10	3	3	588	0.109359	0.0151589	95.7	104.3
P40938	Replication factor C subunit 3 OS=Homo sapiens OX=9606 GN=RFC3 PE=1 SV=2	0	46	13	13	356	0.109359	0.0126165	92.5	107.5
Q9QWL7	Keratin, type I cytoskeletal 17 OS=Mus musculus GN=Krt17 PE=1 SV=3	0	10	5	1	433	0.110916	0.0104655	98.4	101.6
Q5T4U5	Acyl-Coenzyme A dehydrogenase, C-4 to C-12 straight chain, isoform CRA_a OS=Homo sapiens OX=9606 GN=ACADM PE=1 SV=1	0	7	3	3	454	0.110916	0.0153482	69.6	130.4
P19387	DNA-directed RNA polymerase II subunit RPB3 OS=Homo sapiens OX=9606 GN=POLR2C PE=1 SV=2	0	19	3	3	275	0.110916	0.0139613	94.7	105.3
O15020	Spectrin beta chain, non-erythrocytic 2 OS=Homo sapiens OX=9606 GN=SPTBN2 PE=1 SV=3	0	18	32	28	2390	0.110916	0.0102895	100.8	99.2
B4DLN1	cDNA FLJ60124, highly similar to Mitochondrial dicarboxylate carrier OS=Homo sapiens OX=9606 PE=2 SV=1	0	10	2	2	442	0.110916	0.00906651	96.6	103.4
Q9NZ01	Very-long-chain enoyl-CoA reductase OS=Homo sapiens OX=9606 GN=TECR PE=1 SV=1	0	9	3	3	308	0.112475	0.0110857	87.8	112.2
Q6UWU2	Beta-galactosidase-1-like protein OS=Homo sapiens OX=9606 GN=GLB1L PE=2 SV=1	0	10	5	4	654	0.112475	0.0140499	98.9	101.1
P52292	Importin subunit alpha-1 OS=Homo sapiens OX=9606 GN=KPNA2 PE=1 SV=1	0	25	10	10	529	0.112475	0.00861078	92.4	107.6
O75147	Obscurin-like protein 1 OS=Homo sapiens OX=9606 GN=OBSL1 PE=1 SV=4	0	12	16	16	1896	0.112475	0.00735236	89.6	110.4
Q9H7B2	Ribosome production factor 2 homolog OS=Homo sapiens OX=9606 GN=RPF2 PE=1 SV=2	0	15	3	3	306	0.114035	0.0111296	93.9	106.1
Q9H204	Mediator of RNA polymerase II transcription subunit 28 OS=Homo sapiens OX=9606 GN=MED28 PE=1 SV=1	0	23	2	2	178	0.114035	0.0152249	97.6	102.4
Q9BRD0	BUD13 homolog OS=Homo sapiens OX=9606 GN=BUD13 PE=1 SV=1	0	10	4	4	619	0.114035	0.0108018	98.6	101.4
Q14980-2	Isoform 2 of Nuclear mitotic apparatus protein 1 OS=Homo sapiens OX=9606 GN=NUMA1	0	31	43	1	2101	0.114035	0.0136826	97.4	102.6
Q9Y5B6	PAX3- and PAX7-binding protein 1 OS=Homo sapiens OX=9606 GN=PAXBP1 PE=1 SV=2	0	35	24	24	917	0.115597	0.0162765	95.5	104.5
Q08379	Golgin subfamily A member 2 OS=Homo sapiens OX=9606 GN=GOLGA2 PE=1 SV=3	0	25	16	16	1002	0.115597	0.0104655	92.4	107.6
A0A494C0Y4	Mediator of RNA polymerase II transcription subunit 19 OS=Homo sapiens OX=9606 GN=MED19 PE=1 SV=1	0	33	4	4	261	0.115597	0.0104655	96.7	103.3
A0A1W2PRB8	DUF1907 domain-containing protein OS=Homo sapiens OX=9606 PE=4 SV=1	0	20	13	13	838	0.115597	0.0162765	93.6	106.4
Q969H6	Ribonuclease P/MRP protein subunit POP5 OS=Homo sapiens OX=9606 GN=POP5 PE=1 SV=1	0.006	7	1	1	163	0.117161	0.0129487	92.9	107.1
Q13363	C-terminal-binding protein 1 OS=Homo sapiens OX=9606 GN=CTBP1 PE=1 SV=2	0	7	2	1	440	0.117161	0.0129487	95.9	104.1
H3BSH7	U3 small nucleolar RNA-associated protein 4 homolog (Fragment) OS=Homo sapiens OX=9606 GN=UTP4 PE=1 SV=1	0	15	8	8	700	0.117161	0.00936651	92.3	107.7
Q9Y3B4	Splicing factor 3B subunit 6 OS=Homo sapiens OX=9606 GN=SF3B6 PE=1 SV=1	0	32	3	3	125	0.118727	0.0165947	96.9	103.1
Q86XI2-2	Isoform 2 of Condensin-2 complex subunit G2 OS=Homo sapiens OX=9606 GN=NCAPG2	0	9	7	7	1156	0.118727	0.0156352	109.7	90.3
Q16891	MICOS complex subunit MIC60 OS=Homo sapiens OX=9606 GN=IMMT PE=1 SV=1	0	15	9	9	758	0.118727	0.00861078	95.4	104.6
P68032	Actin, alpha cardiac muscle 1 OS=Homo sapiens OX=9606 GN=ACTC1 PE=1 SV=1	0	28	8	2	377	0.118727	0.0167099	96.8	103.2
Q9Y5Q8-3	Isoform 3 of General transcription factor 3C polypeptide 5 OS=Homo sapiens OX=9606 GN=GTF3C5	0	38	15	15	526	0.120294	0.017021	100.1	99.9
Q69YH5	Cell division cycle-associated protein 2 OS=Homo sapiens OX=9606 GN=CDCA2 PE=1 SV=2	0	14	8	8	1023	0.120294	0.0162765	99.8	100.2
P42695	Condensin-2 complex subunit D3 OS=Homo sapiens OX=9606 GN=NCAPD3 PE=1 SV=2	0	9	10	10	1498	0.120294	0.0104655	98.8	101.2
O94832	Unconventional myosin-Id OS=Homo sapiens OX=9606 GN=MYO1D PE=1 SV=2	0	26	20	20	1006	0.120294	0.0104655	87.7	112.3
Q86YB8	ERO1-like protein beta OS=Homo sapiens OX=9606 GN=ERO1B PE=1 SV=2	0	33	12	11	467	0.121863	0.0111296	98.3	101.7
Q86X95	Corepressor interacting with RBPJ 1 OS=Homo sapiens OX=9606 GN=CIR1 PE=1 SV=1	0	10	2	2	450	0.121863	0.0150261	101.1	98.9
O00268	Transcription initiation factor TFIID subunit 4 OS=Homo sapiens OX=9606 GN=TAF4 PE=1 SV=2	0	15	11	10	1085	0.121863	0.0104655	90.9	109.1
Q8IX18	Probable ATP-dependent RNA helicase DHX40 OS=Homo sapiens OX=9606 GN=DHX40 PE=1 SV=2	0	5	3	3	779	0.123434	0.0147255	101.5	98.5
Q6P1M0	Long-chain fatty acid transport protein 4 OS=Homo sapiens OX=9606 GN=SLC27A4 PE=1 SV=1	0	33	15	15	643	0.123434	0.0111296	97.9	102.1
P56182	Ribosomal RNA processing protein 1 homolog A OS=Homo sapiens OX=9606 GN=RRP1 PE=1 SV=1	0	25	9	9	461	0.123434	0.0173157	97	103
O43709-3	Isoform 3 of Probable 18S rRNA (guanine-N(7))-methyltransferase OS=Homo sapiens OX=9606 GN=BUD23	0.009	5	1	1	298	0.123434	0.0140272	92.2	107.8
O14681	Etoposide-induced protein 2.4 homolog OS=Homo sapiens OX=9606 GN=EI24 PE=1 SV=4	0	6	2	2	340	0.123434	0.0126165	93.9	106.1
I3NI02	Golgi SNAP receptor complex member 2 OS=Homo sapiens OX=9606 GN=GOSR2 PE=4 SV=2	0	14	3	3	257	0.123434	0.0153482	94.4	105.6
H7C1N3	BET1 homolog (Fragment) OS=Homo sapiens OX=9606 GN=BET1 PE=1 SV=1	0	22	2	2	133	0.123434	0.0153482	94.6	105.4
Q8NBU5	ATPase family AAA domain-containing protein 1 OS=Homo sapiens OX=9606 GN=ATAD1 PE=1 SV=1	0	22	6	6	361	0.125006	0.0118656	93	107
Q7Z2W9	39S ribosomal protein L21, mitochondrial OS=Homo sapiens OX=9606 GN=MRPL21 PE=1 SV=2	0	26	3	3	205	0.125006	0.0156419	96.3	103.7
Q14697-2	Isoform 2 of Neutral alpha-glucosidase AB OS=Homo sapiens OX=9606 GN=GANAB	0	51	36	36	966	0.125006	0.0173157	97	103
O95573	Long-chain-fatty-acid--CoA ligase 3 OS=Homo sapiens OX=9606 GN=ACSL3 PE=1 SV=3	0	36	18	16	720	0.125006	0.0104655	96.1	103.9
E5RJR5	S-phase kinase-associated protein 1 OS=Homo sapiens OX=9606 GN=SKP1 PE=1 SV=1	0	38	5	5	163	0.125006	0.0117654	91.7	108.3
A0A087WT23	UBX domain-containing protein 8 OS=Homo sapiens OX=9606 GN=UBXN8 PE=1 SV=1	0	13	2	2	310	0.125006	0.0151589	98	102
Q9NTI5	Sister chromatid cohesion protein PDS5 homolog B OS=Homo sapiens OX=9606 GN=PDS5B PE=1 SV=1	0	6	7	4	1447	0.12658	0.013144	91.2	108.8
Q96JM7	Lethal(3)malignant brain tumor-like protein 3 OS=Homo sapiens OX=9606 GN=L3MBTL3 PE=1 SV=2	0	18	11	11	780	0.12658	0.0111296	95	105
M0QZQ2	Mediator of RNA polymerase II transcription subunit 25 OS=Homo sapiens OX=9606 GN=MED25 PE=1 SV=3	0	11	6	6	796	0.12658	0.0147255	95.7	104.3
Q9NWB6	Arginine and glutamate-rich protein 1 OS=Homo sapiens OX=9606 GN=ARGLU1 PE=1 SV=1	0	8	3	3	273	0.128156	0.0180482	107.1	92.9
Q96K12	Fatty acyl-CoA reductase 2 OS=Homo sapiens OX=9606 GN=FAR2 PE=1 SV=1	0	10	4	4	515	0.128156	0.0150261	86.9	113.1
Q96C92-4	Isoform 4 of Endosome-associated-trafficking regulator 1 OS=Homo sapiens OX=9606 GN=ENTR1	0	18	4	4	362	0.128156	0.0156184	100.2	99.8
P62917	60S ribosomal protein L8 OS=Homo sapiens OX=9606 GN=RPL8 PE=1 SV=2	0	22	3	3	257	0.128156	0.0186156	94.2	105.8
O00505	Importin subunit alpha-4 OS=Homo sapiens OX=9606 GN=KPNA3 PE=1 SV=2	0	9	4	4	521	0.128156	0.0145756	97.7	102.3
B4DR61	Protein transport protein Sec61 subunit alpha isoform 1 OS=Homo sapiens OX=9606 GN=SEC61A1 PE=1 SV=1	0	11	3	2	482	0.129734	0.0108018	93.7	106.3
Q15528	Mediator of RNA polymerase II transcription subunit 22 OS=Homo sapiens OX=9606 GN=MED22 PE=1 SV=2	0	9	1	1	200	0.129734	0.0162765	93.3	106.7
P51531	Probable global transcription activator SNF2L2 OS=Homo sapiens OX=9606 GN=SMARCA2 PE=1 SV=2	0	19	21	11	1590	0.129734	0.0117654	99.7	100.3
P43304	Glycerol-3-phosphate dehydrogenase, mitochondrial OS=Homo sapiens OX=9606 GN=GPD2 PE=1 SV=3	0	6	3	3	727	0.129734	0.0151589	97.5	102.5
O75386-2	Isoform 2 of Tubby-related protein 3 OS=Homo sapiens OX=9606 GN=TULP3	0	6	2	2	501	0.129734	0.0151589	95.5	104.5
F8VX10	KAT8 regulatory NSL complex subunit 2 OS=Homo sapiens OX=9606 GN=KANSL2 PE=1 SV=1	0	7	4	4	675	0.129734	0.0133405	95.8	104.2
A4D1E9	GTP-binding protein 10 OS=Homo sapiens OX=9606 GN=GTPBP10 PE=1 SV=1	0	42	13	13	387	0.129734	0.0117654	98	102
Q9ULU4-7	Isoform 7 of Protein kinase C-binding protein 1 OS=Homo sapiens OX=9606 GN=ZMYND8	0	36	31	31	1234	0.131313	0.0197901	101.9	98.1
Q6P2C8	Mediator of RNA polymerase II transcription subunit 27 OS=Homo sapiens OX=9606 GN=MED27 PE=1 SV=1	0	33	6	6	311	0.131313	0.0123211	96.7	103.3
P58107	Epiplakin OS=Homo sapiens OX=9606 GN=EPPK1 PE=1 SV=3	0	18	20	16	5088	0.131313	0.0151589	89.7	110.3
P02786	Transferrin receptor protein 1 OS=Homo sapiens OX=9606 GN=TFRC PE=1 SV=2	0	30	18	18	760	0.131313	0.0117654	95.5	104.5
P36954	DNA-directed RNA polymerase II subunit RPB9 OS=Homo sapiens OX=9606 GN=POLR2I PE=1 SV=1	0	44	3	3	125	0.132894	0.0152249	89.2	110.8
P18583-5	Isoform D of Protein SON OS=Homo sapiens OX=9606 GN=SON	0	18	28	4	2459	0.132894	0.0197901	94.5	105.5
O95249	Golgi SNAP receptor complex member 1 OS=Homo sapiens OX=9606 GN=GOSR1 PE=1 SV=1	0	10	2	2	250	0.132894	0.0152249	95.7	104.3
Q9UQR0	Sex comb on midleg-like protein 2 OS=Homo sapiens OX=9606 GN=SCML2 PE=1 SV=1	0	7	4	4	700	0.134477	0.0151589	94.4	105.6
Q9NZL3	Zinc finger protein 224 OS=Homo sapiens OX=9606 GN=ZNF224 PE=1 SV=3	0	5	3	1	707	0.134477	0.0164299	96.5	103.5
P60842	Eukaryotic initiation factor 4A-I OS=Homo sapiens OX=9606 GN=EIF4A1 PE=1 SV=1	0	22	8	6	406	0.134477	0.0162765	95	105
P48431	Transcription factor SOX-2 OS=Homo sapiens OX=9606 GN=SOX2 PE=1 SV=1	0.001	6	1	1	317	0.134477	0.0197901	95.3	104.7
P07203	Glutathione peroxidase 1 OS=Homo sapiens OX=9606 GN=GPX1 PE=1 SV=4	0	42	6	6	203	0.134477	0.0145986	101.3	98.7
A2A2Q9	Protein AAR2 homolog OS=Homo sapiens OX=9606 GN=AAR2 PE=1 SV=1	0	9	2	2	398	0.134477	0.0147255	96	104
Q9P2N5	RNA-binding protein 27 OS=Homo sapiens OX=9606 GN=RBM27 PE=1 SV=2	0	22	17	16	1060	0.136062	0.0202679	93.5	106.5
Q5SRQ6	Casein kinase II subunit beta OS=Homo sapiens OX=9606 GN=CSNK2B PE=1 SV=2	0	27	4	4	234	0.136062	0.0151589	95	105
Q5JVF3-4	Isoform 4 of PCI domain-containing protein 2 OS=Homo sapiens OX=9606 GN=PCID2	0	20	7	7	453	0.136062	0.0146862	96.8	103.2
Q14966	Zinc finger protein 638 OS=Homo sapiens OX=9606 GN=ZNF638 PE=1 SV=2	0	25	32	32	1978	0.136062	0.0202679	91.1	108.9
P20645	Cation-dependent mannose-6-phosphate receptor OS=Homo sapiens OX=9606 GN=M6PR PE=1 SV=1	0	12	2	2	277	0.136062	0.0152249	88.5	111.5
O95631	Netrin-1 OS=Homo sapiens OX=9606 GN=NTN1 PE=1 SV=2	0	6	2	2	604	0.136062	0.0152249	95.3	104.7
E9PI68	Signal peptidase complex subunit 2 OS=Homo sapiens OX=9606 GN=SPCS2 PE=1 SV=1	0	22	5	5	257	0.136062	0.0202679	95.3	104.7
Q13123	Protein Red OS=Homo sapiens OX=9606 GN=IK PE=1 SV=3	0	28	10	10	557	0.137648	0.0202679	95	105
P61160	Actin-related protein 2 OS=Homo sapiens OX=9606 GN=ACTR2 PE=1 SV=1	0	9	3	3	394	0.137648	0.0197901	96.4	103.6
P53350	Serine/threonine-protein kinase PLK1 OS=Homo sapiens OX=9606 GN=PLK1 PE=1 SV=1	0	36	16	16	603	0.137648	0.013144	97.2	102.8
P29558	RNA-binding motif, single-stranded-interacting protein 1 OS=Homo sapiens OX=9606 GN=RBMS1 PE=1 SV=3	0	11	3	3	406	0.137648	0.0162765	97.9	102.1
P04040	Catalase OS=Homo sapiens OX=9606 GN=CAT PE=1 SV=3	0	5	2	2	527	0.137648	0.0117654	95.3	104.7
O94874	E3 UFM1-protein ligase 1 OS=Homo sapiens OX=9606 GN=UFL1 PE=1 SV=2	0	37	22	22	794	0.137648	0.0197901	95.4	104.6
A0A0B4J1W0	Mediator of RNA polymerase II transcription subunit 24 OS=Homo sapiens OX=9606 GN=MED24 PE=1 SV=1	0	42	30	1	1014	0.137648	0.0202679	92.1	107.9
Q9P0K7-2	Isoform 2 of Ankycorbin OS=Homo sapiens OX=9606 GN=RAI14	0	25	17	17	983	0.139236	0.0149536	94.1	105.9
Q9BY67-3	Isoform 3 of Cell adhesion molecule 1 OS=Homo sapiens OX=9606 GN=CADM1	0	13	3	3	471	0.139236	0.0152249	100.4	99.6
Q96HW7	Integrator complex subunit 4 OS=Homo sapiens OX=9606 GN=INTS4 PE=1 SV=2	0	11	8	8	963	0.139236	0.0202679	96.8	103.2
Q8IVS2	Malonyl-CoA-acyl carrier protein transacylase, mitochondrial OS=Homo sapiens OX=9606 GN=MCAT PE=1 SV=2	0	32	8	8	390	0.139236	0.0149536	94.5	105.5
O95816	BAG family molecular chaperone regulator 2 OS=Homo sapiens OX=9606 GN=BAG2 PE=1 SV=1	0	47	8	8	211	0.139236	0.0202679	96.9	103.1
E2QRJ6	DNA-directed RNA polymerase II subunit RPB11-b2 OS=Homo sapiens OX=9606 GN=POLR2J3 PE=4 SV=1	0	16	3	3	158	0.139236	0.0156352	101.4	98.6
Q9BUR5	MICOS complex subunit MIC26 OS=Homo sapiens OX=9606 GN=APOO PE=1 SV=1	0	18	3	3	198	0.140826	0.0173157	96.5	103.5
Q9BTT4	Mediator of RNA polymerase II transcription subunit 10 OS=Homo sapiens OX=9606 GN=MED10 PE=1 SV=1	0	52	5	5	135	0.140826	0.0145986	95.1	104.9
Q6W2J9	BCL-6 corepressor OS=Homo sapiens OX=9606 GN=BCOR PE=1 SV=1	0	23	22	22	1755	0.140826	0.0151589	95.4	104.6
Q5T280	Putative methyltransferase C9orf114 OS=Homo sapiens OX=9606 GN=SPOUT1 PE=1 SV=3	0	16	4	4	376	0.140826	0.0197901	96.1	103.9
Q08J23	RNA cytosine C(5)-methyltransferase NSUN2 OS=Homo sapiens OX=9606 GN=NSUN2 PE=1 SV=2	0	57	27	27	767	0.140826	0.0218117	99.3	100.7
P31689	DnaJ homolog subfamily A member 1 OS=Homo sapiens OX=9606 GN=DNAJA1 PE=1 SV=2	0	40	10	10	397	0.140826	0.0151589	99.7	100.3
P14649	Myosin light chain 6B OS=Homo sapiens OX=9606 GN=MYL6B PE=1 SV=1	0	18	3	1	208	0.140826	0.0140657	95.1	104.9
A0A0U1RQC9	Cellular tumor antigen p53 OS=Homo sapiens OX=9606 GN=TP53 PE=1 SV=1	0	30	7	7	410	0.140826	0.0176771	93	107
Q9UHA3	Probable ribosome biogenesis protein RLP24 OS=Homo sapiens OX=9606 GN=RSL24D1 PE=1 SV=1	0.007	7	1	1	163	0.142417	0.0180482	95.1	104.9
Q8WWK9	Cytoskeleton-associated protein 2 OS=Homo sapiens OX=9606 GN=CKAP2 PE=1 SV=1	0	14	7	7	683	0.142417	0.0153482	97.3	102.7
Q8WWC4	m-AAA protease-interacting protein 1, mitochondrial OS=Homo sapiens OX=9606 GN=MAIP1 PE=1 SV=1	0	9	2	2	291	0.142417	0.0185952	96.4	103.6
Q3L8U1	Chromodomain-helicase-DNA-binding protein 9 OS=Homo sapiens OX=9606 GN=CHD9 PE=1 SV=2	0	10	24	14	2897	0.142417	0.0151589	94.2	105.8
O43719	HIV Tat-specific factor 1 OS=Homo sapiens OX=9606 GN=HTATSF1 PE=1 SV=1	0	31	16	16	755	0.142417	0.0226897	93.4	106.6
Q9H4K7	Mitochondrial ribosome-associated GTPase 2 OS=Homo sapiens OX=9606 GN=MTG2 PE=1 SV=1	0	7	2	2	406	0.14401	0.0146862	91	109
Q53FV1	ORM1-like protein 2 OS=Homo sapiens OX=9606 GN=ORMDL2 PE=1 SV=2	0.003	10	1	1	153	0.14401	0.0226897	98.8	101.2
E9PLP8	Cleavage stimulation factor subunit 3 OS=Homo sapiens OX=9606 GN=CSTF3 PE=1 SV=2	0	7	4	4	749	0.14401	0.0226897	85.1	114.9
Q9Y2S7	Polymerase delta-interacting protein 2 OS=Homo sapiens OX=9606 GN=POLDIP2 PE=1 SV=1	0	9	3	3	368	0.145605	0.0173157	90.5	109.5
Q9UFF9	CCR4-NOT transcription complex subunit 8 OS=Homo sapiens OX=9606 GN=CNOT8 PE=1 SV=1	0	9	2	2	292	0.145605	0.0153482	95	105
Q96I24	Far upstream element-binding protein 3 OS=Homo sapiens OX=9606 GN=FUBP3 PE=1 SV=2	0	44	17	16	572	0.145605	0.0167099	97.5	102.5
Q15397	Pumilio homolog 3 OS=Homo sapiens OX=9606 GN=PUM3 PE=1 SV=3	0	10	6	6	648	0.145605	0.0197844	100.5	99.5
Q01167	Forkhead box protein K2 OS=Homo sapiens OX=9606 GN=FOXK2 PE=1 SV=3	0	10	3	3	660	0.145605	0.0226897	98.1	101.9
P09622	Dihydrolipoyl dehydrogenase, mitochondrial OS=Homo sapiens OX=9606 GN=DLD PE=1 SV=2	0	20	6	6	509	0.145605	0.0194444	74.9	125.1
X6R8A1	Carboxypeptidase OS=Homo sapiens OX=9606 GN=CTSA PE=1 SV=1	0	13	4	4	498	0.147202	0.0218117	91.2	108.8
Q9NVI7-2	Isoform 2 of ATPase family AAA domain-containing protein 3A OS=Homo sapiens OX=9606 GN=ATAD3A	0	42	20	9	586	0.147202	0.0226897	93.7	106.3
Q9C0E8-4	Isoform 4 of Endoplasmic reticulum junction formation protein lunapark OS=Homo sapiens OX=9606 GN=LNPK	0	7	3	3	459	0.147202	0.0197901	93.2	106.8
Q16514	Transcription initiation factor TFIID subunit 12 OS=Homo sapiens OX=9606 GN=TAF12 PE=1 SV=1	0.001	11	1	1	161	0.147202	0.0197901	97.1	102.9
Q13724	Mannosyl-oligosaccharide glucosidase OS=Homo sapiens OX=9606 GN=MOGS PE=1 SV=5	0	39	22	22	837	0.147202	0.0226897	95.6	104.4
P08572	Collagen alpha-2(IV) chain OS=Homo sapiens OX=9606 GN=COL4A2 PE=1 SV=4	0	5	5	5	1712	0.147202	0.0156419	98.8	101.2
O75909-4	Isoform 4 of Cyclin-K OS=Homo sapiens OX=9606 GN=CCNK	0	29	15	15	600	0.147202	0.0226897	101.2	98.8
Q9NVU7	Protein SDA1 homolog OS=Homo sapiens OX=9606 GN=SDAD1 PE=1 SV=3	0	13	8	8	687	0.148801	0.0158655	96.7	103.3
Q6Y2X3	DnaJ homolog subfamily C member 14 OS=Homo sapiens OX=9606 GN=DNAJC14 PE=2 SV=2	0	8	5	5	702	0.148801	0.0226897	93.7	106.3
Q5JWT2	Mediator of RNA polymerase II transcription subunit 23 OS=Homo sapiens OX=9606 GN=MED23 PE=1 SV=1	0	29	29	29	1374	0.148801	0.0226897	94.3	105.7
Q00765	Receptor expression-enhancing protein 5 OS=Homo sapiens OX=9606 GN=REEP5 PE=1 SV=3	0	10	2	2	189	0.148801	0.0153482	94.6	105.4
Q9BWJ5	Splicing factor 3B subunit 5 OS=Homo sapiens OX=9606 GN=SF3B5 PE=1 SV=1	0	71	4	4	86	0.150401	0.0151589	92.9	107.1
Q15061	WD repeat-containing protein 43 OS=Homo sapiens OX=9606 GN=WDR43 PE=1 SV=3	0	14	6	6	677	0.150401	0.0162765	95.8	104.2
Q14442	Phosphatidylinositol N-acetylglucosaminyltransferase subunit H OS=Homo sapiens OX=9606 GN=PIGH PE=1 SV=1	0	9	2	2	188	0.150401	0.0151589	94.8	105.2
O75486	Transcription initiation protein SPT3 homolog OS=Homo sapiens OX=9606 GN=SUPT3H PE=1 SV=3	0	21	5	5	317	0.150401	0.0170758	96.3	103.7
Q9UL25	Ras-related protein Rab-21 OS=Homo sapiens OX=9606 GN=RAB21 PE=1 SV=3	0.006	5	1	1	225	0.152003	0.0197901	94.7	105.3
Q96S55	ATPase WRNIP1 OS=Homo sapiens OX=9606 GN=WRNIP1 PE=1 SV=2	0	7	3	3	665	0.152003	0.0180872	95.5	104.5
Q7LBC6	Lysine-specific demethylase 3B OS=Homo sapiens OX=9606 GN=KDM3B PE=1 SV=2	0	5	6	6	1761	0.152003	0.0173157	101.6	98.4
O75381	Peroxisomal membrane protein PEX14 OS=Homo sapiens OX=9606 GN=PEX14 PE=1 SV=1	0	31	7	7	377	0.152003	0.0156352	93.1	106.9
A1L170-2	Isoform 2 of Uncharacterized protein C1orf226 OS=Homo sapiens OX=9606 GN=C1orf226	0	17	3	3	315	0.152003	0.0202679	94.3	105.7
Q92542	Nicastrin OS=Homo sapiens OX=9606 GN=NCSTN PE=1 SV=2	0	11	7	7	709	0.153607	0.0162765	94.6	105.4
Q8IWZ3-6	Isoform 6 of Ankyrin repeat and KH domain-containing protein 1 OS=Homo sapiens OX=9606 GN=ANKHD1	0	14	25	14	2617	0.153607	0.0197901	91.9	108.1
Q15059	Bromodomain-containing protein 3 OS=Homo sapiens OX=9606 GN=BRD3 PE=1 SV=1	0	22	12	8	726	0.153607	0.0177372	92.1	107.9
Q13049	E3 ubiquitin-protein ligase TRIM32 OS=Homo sapiens OX=9606 GN=TRIM32 PE=1 SV=2	0	13	6	6	653	0.153607	0.0241145	96.5	103.5
P82932	28S ribosomal protein S6, mitochondrial OS=Homo sapiens OX=9606 GN=MRPS6 PE=1 SV=3	0.003	10	1	1	125	0.153607	0.0202679	95.6	104.4
P82650	28S ribosomal protein S22, mitochondrial OS=Homo sapiens OX=9606 GN=MRPS22 PE=1 SV=1	0	36	10	10	360	0.153607	0.0226897	93.6	106.4
P36578	60S ribosomal protein L4 OS=Homo sapiens OX=9606 GN=RPL4 PE=1 SV=5	0	33	11	11	427	0.153607	0.0240261	95.1	104.9
P14373	Zinc finger protein RFP OS=Homo sapiens OX=9606 GN=TRIM27 PE=1 SV=1	0	29	11	11	513	0.153607	0.0162765	99.7	100.3
K7ERQ8	PCAF_N domain-containing protein (Fragment) OS=Homo sapiens OX=9606 PE=4 SV=1	0	18	4	3	282	0.153607	0.0178032	94.4	105.6
H0YGM0	Caseinolytic peptidase B protein homolog (Fragment) OS=Homo sapiens OX=9606 GN=CLPB PE=1 SV=1	0	6	4	4	712	0.153607	0.0226897	93.7	106.3
Q9Y606	tRNA pseudouridine synthase A OS=Homo sapiens OX=9606 GN=PUS1 PE=1 SV=3	0	10	4	4	427	0.155213	0.0176771	93.8	106.2
Q9HD45	Transmembrane 9 superfamily member 3 OS=Homo sapiens OX=9606 GN=TM9SF3 PE=1 SV=2	0	11	6	6	589	0.15682	0.0202679	90.3	109.7
A0A1W2PPR8	HLA class I histocompatibility antigen, B alpha chain OS=Homo sapiens OX=9606 GN=HLA-B PE=1 SV=1	0	31	8	3	363	0.15682	0.0241145	97.8	102.2
Q8NAF0	Zinc finger protein 579 OS=Homo sapiens OX=9606 GN=ZNF579 PE=1 SV=2	0	14	5	5	562	0.158429	0.0202679	93	107
Q15542	Transcription initiation factor TFIID subunit 5 OS=Homo sapiens OX=9606 GN=TAF5 PE=1 SV=3	0	21	12	12	800	0.158429	0.0164299	95.4	104.6
P68400	Casein kinase II subunit alpha OS=Homo sapiens OX=9606 GN=CSNK2A1 PE=1 SV=1	0	41	11	10	391	0.158429	0.0173157	97.4	102.6
P48634	Protein PRRC2A OS=Homo sapiens OX=9606 GN=PRRC2A PE=1 SV=3	0	12	15	15	2157	0.158429	0.0173157	97	103
P41743	Protein kinase C iota type OS=Homo sapiens OX=9606 GN=PRKCI PE=1 SV=2	0	11	3	3	596	0.158429	0.021722	95.3	104.7
A0A0G2JLB3	Glucosylceramidase OS=Homo sapiens OX=9606 GN=GBA PE=1 SV=1	0	25	8	8	536	0.158429	0.0151589	93.3	106.7
Q9BSM1	Polycomb group RING finger protein 1 OS=Homo sapiens OX=9606 GN=PCGF1 PE=1 SV=2	0	21	4	4	259	0.16004	0.0162765	95.5	104.5
P31274	Homeobox protein Hox-C9 OS=Homo sapiens OX=9606 GN=HOXC9 PE=1 SV=3	0	26	4	4	260	0.16004	0.0171067	97.2	102.8
Q9Y2P8	RNA 3'-terminal phosphate cyclase-like protein OS=Homo sapiens OX=9606 GN=RCL1 PE=1 SV=3	0	20	6	6	373	0.161653	0.0248254	93	107
P61165	Transmembrane protein 258 OS=Homo sapiens OX=9606 GN=TMEM258 PE=1 SV=1	0.001	10	1	1	79	0.161653	0.0153482	104.9	95.1
Q9Y3I0	tRNA-splicing ligase RtcB homolog OS=Homo sapiens OX=9606 GN=RTCB PE=1 SV=1	0	20	8	8	505	0.163268	0.0165947	95.1	104.9
Q9UQE7	Structural maintenance of chromosomes protein 3 OS=Homo sapiens OX=9606 GN=SMC3 PE=1 SV=2	0	24	22	22	1217	0.163268	0.0173157	85.2	114.8
Q92665	28S ribosomal protein S31, mitochondrial OS=Homo sapiens OX=9606 GN=MRPS31 PE=1 SV=3	0	35	9	9	395	0.163268	0.0170895	92.2	107.8
Q06787	Synaptic functional regulator FMR1 OS=Homo sapiens OX=9606 GN=FMR1 PE=1 SV=1	0	5	3	2	632	0.163268	0.0197901	93.9	106.1
P61158	Actin-related protein 3 OS=Homo sapiens OX=9606 GN=ACTR3 PE=1 SV=3	0	21	6	6	418	0.163268	0.0226897	94.5	105.5
P40227	T-complex protein 1 subunit zeta OS=Homo sapiens OX=9606 GN=CCT6A PE=1 SV=3	0	32	12	12	531	0.163268	0.0170895	99.9	100.1
O60885	Bromodomain-containing protein 4 OS=Homo sapiens OX=9606 GN=BRD4 PE=1 SV=2	0	9	11	5	1362	0.163268	0.0229215	87.1	112.9
O43290	U4/U6.U5 tri-snRNP-associated protein 1 OS=Homo sapiens OX=9606 GN=SART1 PE=1 SV=1	0	45	26	26	800	0.163268	0.0250984	92.8	107.2
H0YBH7	Store-operated calcium entry-associated regulatory factor (Fragment) OS=Homo sapiens OX=9606 GN=SARAF PE=1 SV=1	0	10	2	2	347	0.163268	0.0250984	94.4	105.6
Q9NVM9	Integrator complex subunit 13 OS=Homo sapiens OX=9606 GN=INTS13 PE=1 SV=2	0	8	5	5	706	0.164884	0.0235631	70.4	129.6
Q8NI36	WD repeat-containing protein 36 OS=Homo sapiens OX=9606 GN=WDR36 PE=1 SV=1	0	25	18	18	951	0.164884	0.0154634	93.5	106.5
Q9Y5T5	Ubiquitin carboxyl-terminal hydrolase 16 OS=Homo sapiens OX=9606 GN=USP16 PE=1 SV=1	0	10	6	6	823	0.166503	0.0226897	100	100
Q8WXI9	Transcriptional repressor p66-beta OS=Homo sapiens OX=9606 GN=GATAD2B PE=1 SV=1	0	43	15	14	593	0.166503	0.0258655	93.6	106.4
Q29RF7	Sister chromatid cohesion protein PDS5 homolog A OS=Homo sapiens OX=9606 GN=PDS5A PE=1 SV=1	0	31	28	25	1337	0.166503	0.0258655	87.5	112.5
O60831	PRA1 family protein 2 OS=Homo sapiens OX=9606 GN=PRAF2 PE=1 SV=1	0.001	6	1	1	178	0.166503	0.0225501	94.2	105.8
O60244	Mediator of RNA polymerase II transcription subunit 14 OS=Homo sapiens OX=9606 GN=MED14 PE=1 SV=2	0	33	34	34	1454	0.166503	0.0258655	98.7	101.3
Q9NUL3	Double-stranded RNA-binding protein Staufen homolog 2 OS=Homo sapiens OX=9606 GN=STAU2 PE=1 SV=2	0	8	3	3	570	0.168123	0.0226897	93.2	106.8
Q92547	DNA topoisomerase 2-binding protein 1 OS=Homo sapiens OX=9606 GN=TOPBP1 PE=1 SV=3	0	14	15	15	1522	0.168123	0.0191368	79.8	120.2
Q7L2J0	7SK snRNA methylphosphate capping enzyme OS=Homo sapiens OX=9606 GN=MEPCE PE=1 SV=1	0	34	12	12	689	0.168123	0.0197901	95.7	104.3
P16870	Carboxypeptidase E OS=Homo sapiens OX=9606 GN=CPE PE=1 SV=1	0	11	3	3	476	0.168123	0.0197901	94.2	105.8
O14734	Acyl-coenzyme A thioesterase 8 OS=Homo sapiens OX=9606 GN=ACOT8 PE=1 SV=1	0	12	2	2	319	0.168123	0.0172118	94.2	105.8
Q9H9Y2	Ribosome production factor 1 OS=Homo sapiens OX=9606 GN=RPF1 PE=1 SV=2	0	6	2	2	349	0.169745	0.0226897	94.1	105.9
Q86SE9	Polycomb group RING finger protein 5 OS=Homo sapiens OX=9606 GN=PCGF5 PE=1 SV=1	0	9	2	2	256	0.169745	0.0261843	93.1	106.9
Q14781	Chromobox protein homolog 2 OS=Homo sapiens OX=9606 GN=CBX2 PE=1 SV=2	0	5	2	2	532	0.169745	0.0226769	97.4	102.6
Q9NTJ3	Structural maintenance of chromosomes protein 4 OS=Homo sapiens OX=9606 GN=SMC4 PE=1 SV=2	0	10	7	7	1288	0.171368	0.0241145	88.7	111.3
Q8NCR0	UDP-GalNAc:beta-1,3-N-acetylgalactosaminyltransferase 2 OS=Homo sapiens OX=9606 GN=B3GALNT2 PE=1 SV=1	0	5	2	2	500	0.171368	0.0226897	89.9	110.1
Q8NC56	LEM domain-containing protein 2 OS=Homo sapiens OX=9606 GN=LEMD2 PE=1 SV=1	0	20	6	6	503	0.171368	0.0197901	91.1	108.9
P17509	Homeobox protein Hox-B6 OS=Homo sapiens OX=9606 GN=HOXB6 PE=1 SV=4	0	25	4	4	224	0.171368	0.0241145	97.2	102.8
Q96DV4	39S ribosomal protein L38, mitochondrial OS=Homo sapiens OX=9606 GN=MRPL38 PE=1 SV=2	0	26	7	7	380	0.172994	0.0250984	95.4	104.6
Q8N1G0	Zinc finger protein 687 OS=Homo sapiens OX=9606 GN=ZNF687 PE=1 SV=1	0	25	17	17	1237	0.172994	0.0226897	94.9	105.1
P18085	ADP-ribosylation factor 4 OS=Homo sapiens OX=9606 GN=ARF4 PE=1 SV=3	0	23	3	3	180	0.172994	0.0240261	94	106
O60832	H/ACA ribonucleoprotein complex subunit DKC1 OS=Homo sapiens OX=9606 GN=DKC1 PE=1 SV=3	0	32	12	12	514	0.172994	0.0264212	93.6	106.4
Q9UFC0	Leucine-rich repeat and WD repeat-containing protein 1 OS=Homo sapiens OX=9606 GN=LRWD1 PE=1 SV=2	0	9	4	4	647	0.174621	0.0240261	90.9	109.1
Q96JB5	CDK5 regulatory subunit-associated protein 3 OS=Homo sapiens OX=9606 GN=CDK5RAP3 PE=1 SV=2	0	15	6	6	506	0.174621	0.0202679	93.5	106.5
P07686	Beta-hexosaminidase subunit beta OS=Homo sapiens OX=9606 GN=HEXB PE=1 SV=3	0	22	9	8	556	0.174621	0.0197901	93.9	106.1
O60888-2	Isoform A of Protein CutA OS=Homo sapiens OX=9606 GN=CUTA	0	22	3	3	198	0.174621	0.0226769	104.7	95.3
Q8N684-3	Isoform 3 of Cleavage and polyadenylation specificity factor subunit 7 OS=Homo sapiens OX=9606 GN=CPSF7	0	19	8	8	514	0.176251	0.0273183	92.3	107.7
Q5JRX3-2	Isoform 2 of Presequence protease, mitochondrial OS=Homo sapiens OX=9606 GN=PITRM1	0	12	9	9	1038	0.176251	0.0226897	94.4	105.6
P49750	YLP motif-containing protein 1 OS=Homo sapiens OX=9606 GN=YLPM1 PE=1 SV=4	0	11	14	14	2146	0.176251	0.0199444	84.6	115.4
O43913	Origin recognition complex subunit 5 OS=Homo sapiens OX=9606 GN=ORC5 PE=1 SV=1	0	6	2	2	435	0.176251	0.0226897	96.4	103.6
O75475	PC4 and SFRS1-interacting protein OS=Homo sapiens OX=9606 GN=PSIP1 PE=1 SV=1	0	21	9	9	530	0.177882	0.0273183	95.2	104.8
G3V325	ATP5MF-PTCD1 readthrough OS=Homo sapiens OX=9606 GN=ATP5MF-PTCD1 PE=4 SV=1	0	8	5	5	749	0.177882	0.0261843	97.9	102.1
Q9H6H4	Receptor expression-enhancing protein 4 OS=Homo sapiens OX=9606 GN=REEP4 PE=1 SV=1	0	25	4	4	257	0.179515	0.0226897	91.7	108.3
Q14683	Structural maintenance of chromosomes protein 1A OS=Homo sapiens OX=9606 GN=SMC1A PE=1 SV=2	0	21	21	21	1233	0.179515	0.0204513	92	108
Q9H8H0	Nucleolar protein 11 OS=Homo sapiens OX=9606 GN=NOL11 PE=1 SV=1	0	13	7	7	719	0.181149	0.0214915	96.3	103.7
P60709	Actin, cytoplasmic 1 OS=Homo sapiens OX=9606 GN=ACTB PE=1 SV=1	0	66	16	1	375	0.181149	0.0273183	92.9	107.1
I3L1Q2	B-cell CLL/lymphoma 7 protein family member C (Fragment) OS=Homo sapiens OX=9606 GN=BCL7C PE=1 SV=1	0	34	5	4	293	0.181149	0.0226897	93.5	106.5
A0A087X295	WD repeat-containing protein 6 OS=Homo sapiens OX=9606 GN=WDR6 PE=1 SV=1	0	31	23	23	1151	0.181149	0.0273183	94.6	105.4
Q9P2S5	WD repeat-containing protein WRAP73 OS=Homo sapiens OX=9606 GN=WRAP73 PE=1 SV=1	0	28	9	9	460	0.182786	0.0204513	83.9	116.1
Q99459	Cell division cycle 5-like protein OS=Homo sapiens OX=9606 GN=CDC5L PE=1 SV=2	0	45	30	30	802	0.182786	0.0273183	93.3	106.7
Q16795	NADH dehydrogenase [ubiquinone] 1 alpha subcomplex subunit 9, mitochondrial OS=Homo sapiens OX=9606 GN=NDUFA9 PE=1 SV=2	0	26	7	7	377	0.182786	0.0241145	91.6	108.4
Q16576	Histone-binding protein RBBP7 OS=Homo sapiens OX=9606 GN=RBBP7 PE=1 SV=1	0	55	14	10	425	0.182786	0.0273183	92	108
Q9P086	Mediator of RNA polymerase II transcription subunit 11 OS=Homo sapiens OX=9606 GN=MED11 PE=1 SV=2	0	32	2	2	117	0.184425	0.0226897	97	103
P42166	Lamina-associated polypeptide 2, isoform alpha OS=Homo sapiens OX=9606 GN=TMPO PE=1 SV=2	0	34	16	10	694	0.184425	0.0273183	96.3	103.7
Q96CS3	FAS-associated factor 2 OS=Homo sapiens OX=9606 GN=FAF2 PE=1 SV=2	0	39	11	11	445	0.186065	0.0226897	98.3	101.7
P55884-2	Isoform 2 of Eukaryotic translation initiation factor 3 subunit B OS=Homo sapiens OX=9606 GN=EIF3B	0	13	7	7	873	0.186065	0.0273183	95.6	104.4
P34059	N-acetylgalactosamine-6-sulfatase OS=Homo sapiens OX=9606 GN=GALNS PE=1 SV=1	0	10	4	4	522	0.186065	0.0273183	93.6	106.4
P12236	ADP/ATP translocase 3 OS=Homo sapiens OX=9606 GN=SLC25A6 PE=1 SV=4	0	22	6	2	298	0.186065	0.0218267	93.3	106.7
O95983	Methyl-CpG-binding domain protein 3 OS=Homo sapiens OX=9606 GN=MBD3 PE=1 SV=1	0	28	7	7	291	0.186065	0.0226897	88.9	111.1
Q96EY7	Pentatricopeptide repeat domain-containing protein 3, mitochondrial OS=Homo sapiens OX=9606 GN=PTCD3 PE=1 SV=3	0	18	10	10	689	0.187707	0.0241145	92.5	107.5
O60684	Importin subunit alpha-7 OS=Homo sapiens OX=9606 GN=KPNA6 PE=1 SV=1	0	9	3	1	536	0.187707	0.0173157	98.1	101.9
G5EA36	Cell division cycle 27, isoform CRA_c OS=Homo sapiens OX=9606 GN=CDC27 PE=1 SV=1	0	24	13	1	823	0.187707	0.0226897	93.5	106.5
P47756	F-actin-capping protein subunit beta OS=Homo sapiens OX=9606 GN=CAPZB PE=1 SV=4	0	28	6	6	277	0.189351	0.0226897	94.4	105.6
P42167	Lamina-associated polypeptide 2, isoforms beta/gamma OS=Homo sapiens OX=9606 GN=TMPO PE=1 SV=2	0	44	12	6	454	0.189351	0.0273183	87.8	112.2
P35613	Basigin OS=Homo sapiens OX=9606 GN=BSG PE=1 SV=2	0	12	3	3	385	0.189351	0.0273183	93.7	106.3
P15924	Desmoplakin OS=Homo sapiens OX=9606 GN=DSP PE=1 SV=3	0	27	61	61	2871	0.189351	0.0273183	94	106
P08238	Heat shock protein HSP 90-beta OS=Homo sapiens OX=9606 GN=HSP90AB1 PE=1 SV=4	0	22	12	4	724	0.189351	0.0241145	95.4	104.6
O75925-2	Isoform 2 of E3 SUMO-protein ligase PIAS1 OS=Homo sapiens OX=9606 GN=PIAS1	0	14	5	4	653	0.189351	0.0261843	97.7	102.3
D6W592	Heterogeneous nuclear ribonucleoprotein L-like OS=Homo sapiens OX=9606 GN=HNRNPLL PE=1 SV=1	0	37	13	13	542	0.189351	0.0226897	94.4	105.6
Q8N201	Integrator complex subunit 1 OS=Homo sapiens OX=9606 GN=INTS1 PE=1 SV=2	0	8	13	13	2190	0.190997	0.0273183	92.6	107.4
Q8IXI1	Mitochondrial Rho GTPase 2 OS=Homo sapiens OX=9606 GN=RHOT2 PE=1 SV=2	0	17	7	6	618	0.190997	0.0273183	104.9	95.1
Q15773	Myeloid leukemia factor 2 OS=Homo sapiens OX=9606 GN=MLF2 PE=1 SV=1	0	11	2	2	248	0.190997	0.0250984	93.9	106.1
Q13601	KRR1 small subunit processome component homolog OS=Homo sapiens OX=9606 GN=KRR1 PE=1 SV=4	0	12	4	4	381	0.190997	0.0250984	94.3	105.7
O14974	Protein phosphatase 1 regulatory subunit 12A OS=Homo sapiens OX=9606 GN=PPP1R12A PE=1 SV=1	0	8	7	7	1030	0.190997	0.0241615	92.5	107.5
A0A1B0GW41	Inhibitor of growth protein 5 OS=Homo sapiens OX=9606 GN=ING5 PE=1 SV=1	0.001	5	1	1	254	0.190997	0.0273183	92.4	107.6
Q8TED1	Probable glutathione peroxidase 8 OS=Homo sapiens OX=9606 GN=GPX8 PE=1 SV=2	0	15	3	3	209	0.192645	0.0268663	91.1	108.9
P54709	Sodium/potassium-transporting ATPase subunit beta-3 OS=Homo sapiens OX=9606 GN=ATP1B3 PE=1 SV=1	0	16	4	4	279	0.192645	0.0261843	92.3	107.7
P10809	60 kDa heat shock protein, mitochondrial OS=Homo sapiens OX=9606 GN=HSPD1 PE=1 SV=2	0	51	18	18	573	0.192645	0.0273183	94.8	105.2
P07237	Protein disulfide-isomerase OS=Homo sapiens OX=9606 GN=P4HB PE=1 SV=3	0	41	15	15	508	0.192645	0.0273183	95.4	104.6
O75150	E3 ubiquitin-protein ligase BRE1B OS=Homo sapiens OX=9606 GN=RNF40 PE=1 SV=5	0	10	7	7	1001	0.192645	0.0273183	92.7	107.3
O75131	Copine-3 OS=Homo sapiens OX=9606 GN=CPNE3 PE=1 SV=1	0	22	9	9	537	0.192645	0.0248254	92.4	107.6
Q01082	Spectrin beta chain, non-erythrocytic 1 OS=Homo sapiens OX=9606 GN=SPTBN1 PE=1 SV=2	0	23	38	35	2364	0.194295	0.0241145	93.7	106.3
Q96HY6	DDRGK domain-containing protein 1 OS=Homo sapiens OX=9606 GN=DDRGK1 PE=1 SV=2	0	42	7	7	314	0.195946	0.0241145	95.4	104.6
Q5FBB7	Shugoshin 1 OS=Homo sapiens OX=9606 GN=SGO1 PE=1 SV=1	0	7	3	3	561	0.195946	0.0261843	91.3	108.7
O75818	Ribonuclease P protein subunit p40 OS=Homo sapiens OX=9606 GN=RPP40 PE=1 SV=3	0	14	3	3	363	0.195946	0.0273183	92.1	107.9
O75529	TAF5-like RNA polymerase II p300/CBP-associated factor-associated factor 65 kDa subunit 5L OS=Homo sapiens OX=9606 GN=TAF5L PE=1 SV=1	0	13	5	5	589	0.195946	0.0250984	95.2	104.8
E5RJF8	Centrin-3 OS=Homo sapiens OX=9606 GN=CETN3 PE=1 SV=1	0	17	2	2	191	0.195946	0.0273183	93.5	106.5
Q8WXW3	Progesterone-induced-blocking factor 1 OS=Homo sapiens OX=9606 GN=PIBF1 PE=1 SV=2	0	17	11	11	757	0.1976	0.0226897	100.9	99.1
Q8TAD8	Smad nuclear-interacting protein 1 OS=Homo sapiens OX=9606 GN=SNIP1 PE=1 SV=1	0	16	4	4	396	0.1976	0.0250984	91.1	108.9
Q8NBZ7-2	Isoform 2 of UDP-glucuronic acid decarboxylase 1 OS=Homo sapiens OX=9606 GN=UXS1	0	24	5	5	425	0.1976	0.0273183	95.5	104.5
P31930	Cytochrome b-c1 complex subunit 1, mitochondrial OS=Homo sapiens OX=9606 GN=UQCRC1 PE=1 SV=3	0	15	5	5	480	0.1976	0.0250984	100.2	99.8
P26572	Alpha-1,3-mannosyl-glycoprotein 2-beta-N-acetylglucosaminyltransferase OS=Homo sapiens OX=9606 GN=MGAT1 PE=1 SV=2	0	7	2	2	445	0.1976	0.0273183	93.8	106.2
M0R226	39S ribosomal protein L34, mitochondrial OS=Homo sapiens OX=9606 GN=MRPL34 PE=1 SV=1	0.003	7	1	1	184	0.1976	0.0222902	91.6	108.4
Q9Y676	28S ribosomal protein S18b, mitochondrial OS=Homo sapiens OX=9606 GN=MRPS18B PE=1 SV=1	0	38	6	6	258	0.199255	0.0241145	93.9	106.1
Q8N5N7	39S ribosomal protein L50, mitochondrial OS=Homo sapiens OX=9606 GN=MRPL50 PE=1 SV=2	0	56	7	7	158	0.199255	0.0261843	97	103
Q7KYR7	Butyrophilin subfamily 2 member A1 OS=Homo sapiens OX=9606 GN=BTN2A1 PE=1 SV=3	0	10	3	3	527	0.199255	0.0273183	92.8	107.2
O94776	Metastasis-associated protein MTA2 OS=Homo sapiens OX=9606 GN=MTA2 PE=1 SV=1	0	34	16	14	668	0.199255	0.0273183	92.9	107.1
O60568	Multifunctional procollagen lysine hydroxylase and glycosyltransferase LH3 OS=Homo sapiens OX=9606 GN=PLOD3 PE=1 SV=1	0	36	21	21	738	0.199255	0.0273183	91.8	108.2
Q92917	G-patch domain and KOW motifs-containing protein OS=Homo sapiens OX=9606 GN=GPKOW PE=1 SV=2	0	15	5	5	476	0.200913	0.0273183	88.1	111.9
Q13868	Exosome complex component RRP4 OS=Homo sapiens OX=9606 GN=EXOSC2 PE=1 SV=2	0	51	10	10	293	0.200913	0.0273183	97.9	102.1
E7ETU7	39S ribosomal protein L3, mitochondrial OS=Homo sapiens OX=9606 GN=MRPL3 PE=1 SV=1	0	9	3	3	375	0.200913	0.0273183	92.4	107.6
Q9P2N6-3	Isoform 3 of KAT8 regulatory NSL complex subunit 3 OS=Homo sapiens OX=9606 GN=KANSL3	0	17	9	9	878	0.202572	0.0250984	94	106
Q96GM5	SWI/SNF-related matrix-associated actin-dependent regulator of chromatin subfamily D member 1 OS=Homo sapiens OX=9606 GN=SMARCD1 PE=1 SV=2	0	33	15	14	515	0.202572	0.0273183	93.3	106.7
Q92831	Histone acetyltransferase KAT2B OS=Homo sapiens OX=9606 GN=KAT2B PE=1 SV=3	0	9	7	5	832	0.202572	0.0273183	94.9	105.1
P46776	60S ribosomal protein L27a OS=Homo sapiens OX=9606 GN=RPL27A PE=1 SV=2	0	23	4	4	148	0.202572	0.0273183	93	107
Q9BTT6	Leucine-rich repeat-containing protein 1 OS=Homo sapiens OX=9606 GN=LRRC1 PE=1 SV=1	0	7	3	3	524	0.204233	0.0273183	93.1	106.9
Q9BRJ6	Uncharacterized protein C7orf50 OS=Homo sapiens OX=9606 GN=C7orf50 PE=1 SV=1	0	18	2	2	194	0.204233	0.0273183	95.5	104.5
Q86TJ2	Transcriptional adapter 2-beta OS=Homo sapiens OX=9606 GN=TADA2B PE=1 SV=2	0	23	8	8	420	0.204233	0.0273183	83.9	116.1
Q5T8P6-2	Isoform 2 of RNA-binding protein 26 OS=Homo sapiens OX=9606 GN=RBM26	0	20	14	13	983	0.204233	0.0273183	90.9	109.1
O94985-2	Isoform 2 of Calsyntenin-1 OS=Homo sapiens OX=9606 GN=CLSTN1	0	8	6	6	971	0.204233	0.0273183	95.6	104.4
Q9ULX6	A-kinase anchor protein 8-like OS=Homo sapiens OX=9606 GN=AKAP8L PE=1 SV=4	0	20	9	9	646	0.205896	0.0250984	93.2	106.8
Q96ST3	Paired amphipathic helix protein Sin3a OS=Homo sapiens OX=9606 GN=SIN3A PE=1 SV=2	0	32	30	30	1273	0.205896	0.0273183	93.1	106.9
Q8N442	Translation factor GUF1, mitochondrial OS=Homo sapiens OX=9606 GN=GUF1 PE=1 SV=1	0	11	6	6	669	0.205896	0.0273183	90.2	109.8
Q6UN15	Pre-mRNA 3'-end-processing factor FIP1 OS=Homo sapiens OX=9606 GN=FIP1L1 PE=1 SV=1	0	52	17	17	594	0.205896	0.0273183	92.7	107.3
Q13616	Cullin-1 OS=Homo sapiens OX=9606 GN=CUL1 PE=1 SV=2	0	7	4	4	776	0.205896	0.0273183	93.3	106.7
Q12834	Cell division cycle protein 20 homolog OS=Homo sapiens OX=9606 GN=CDC20 PE=1 SV=2	0	13	5	5	499	0.205896	0.0273183	92.1	107.9
A0A0G2JNT7	KAT8 regulatory NSL complex subunit 1 OS=Homo sapiens OX=9606 GN=KANSL1 PE=1 SV=1	0	22	16	16	1105	0.205896	0.0250984	93.8	106.2
A0A0D9SF53	ATP-dependent RNA helicase DDX3X OS=Homo sapiens OX=9606 GN=DDX3X PE=1 SV=1	0	30	14	13	733	0.205896	0.0273183	90.1	109.9
Q8N983-7	Isoform 6 of 39S ribosomal protein L43, mitochondrial OS=Homo sapiens OX=9606 GN=MRPL43	0	8	2	2	261	0.207561	0.0273183	92.1	107.9
P82921	28S ribosomal protein S21, mitochondrial OS=Homo sapiens OX=9606 GN=MRPS21 PE=1 SV=3	0	39	3	3	87	0.207561	0.0273183	81.7	118.3
P28331-2	Isoform 2 of NADH-ubiquinone oxidoreductase 75 kDa subunit, mitochondrial OS=Homo sapiens OX=9606 GN=NDUFS1	0	6	3	3	741	0.207561	0.0261843	90.4	109.6
Q9Y3C7	Mediator of RNA polymerase II transcription subunit 31 OS=Homo sapiens OX=9606 GN=MED31 PE=1 SV=1	0	23	2	2	131	0.209228	0.0265731	91.4	108.6
Q9Y2J2-2	Isoform 2 of Band 4.1-like protein 3 OS=Homo sapiens OX=9606 GN=EPB41L3	0	22	14	14	865	0.209228	0.0257204	92.5	107.5
Q8WTV0-2	Isoform 1 of Scavenger receptor class B member 1 OS=Homo sapiens OX=9606 GN=SCARB1	0	8	4	4	509	0.209228	0.0272235	93.1	106.9
Q5RKV6	Exosome complex component MTR3 OS=Homo sapiens OX=9606 GN=EXOSC6 PE=1 SV=1	0	22	6	6	272	0.209228	0.0250984	89.4	110.6
Q01780	Exosome component 10 OS=Homo sapiens OX=9606 GN=EXOSC10 PE=1 SV=2	0	48	29	29	885	0.209228	0.0273183	91.1	108.9
P48651	Phosphatidylserine synthase 1 OS=Homo sapiens OX=9606 GN=PTDSS1 PE=1 SV=1	0	18	6	6	473	0.209228	0.0250984	96.9	103.1
P46940	Ras GTPase-activating-like protein IQGAP1 OS=Homo sapiens OX=9606 GN=IQGAP1 PE=1 SV=1	0	30	36	35	1657	0.209228	0.0273183	88.9	111.1
E9PL17	Polyribonucleotide 5'-hydroxyl-kinase Clp1 OS=Homo sapiens OX=9606 GN=CLP1 PE=1 SV=1	0	23	8	8	436	0.209228	0.0261843	86.5	113.5
Q9UJX2	Cell division cycle protein 23 homolog OS=Homo sapiens OX=9606 GN=CDC23 PE=1 SV=3	0	18	10	10	597	0.210897	0.0261843	91.5	108.5
Q96FL9	Polypeptide N-acetylgalactosaminyltransferase 14 OS=Homo sapiens OX=9606 GN=GALNT14 PE=1 SV=1	0	24	9	1	552	0.210897	0.0273183	92.7	107.3
P55199	RNA polymerase II elongation factor ELL OS=Homo sapiens OX=9606 GN=ELL PE=1 SV=1	0	6	3	3	621	0.210897	0.0273183	95.7	104.3
P20674	Cytochrome c oxidase subunit 5A, mitochondrial OS=Homo sapiens OX=9606 GN=COX5A PE=1 SV=2	0	41	3	3	150	0.210897	0.0273183	73.8	126.2
P51571	Translocon-associated protein subunit delta OS=Homo sapiens OX=9606 GN=SSR4 PE=1 SV=1	0	31	4	4	173	0.212568	0.0273183	92.8	107.2
Q92830	Histone acetyltransferase KAT2A OS=Homo sapiens OX=9606 GN=KAT2A PE=1 SV=3	0	10	8	5	837	0.212568	0.0273183	87.1	112.9
Q13310-3	Isoform 3 of Polyadenylate-binding protein 4 OS=Homo sapiens OX=9606 GN=PABPC4	0	37	19	12	660	0.212568	0.0273183	90.6	109.4
E7ERK9	Translation initiation factor eIF-2B subunit delta OS=Homo sapiens OX=9606 GN=EIF2B4 PE=1 SV=1	0	33	12	12	544	0.212568	0.0273183	92.2	107.8
O75934	Pre-mRNA-splicing factor SPF27 OS=Homo sapiens OX=9606 GN=BCAS2 PE=1 SV=1	0	58	10	10	225	0.21424	0.0273183	90.4	109.6
[truncated: 885 more rows]
