# Supplementary material for: EMC-dependent membrane insertion of IER3IP1 sustains efficient ER-to-Golgi trafficking
Source: Research Square preprint supplement (doi:10.21203/rs.3.rs-8560191/v1), 2026-02-11
Supplement: Supplementary file 3 [file 29a8bb284a84c63a22b006ff.docx]

**[Supplementary information]**

**EMC-dependent membrane insertion of IER3IP1 sustains efficient ER-to-Golgi trafficking**

Yejin Shin1, Minseok Shin1, Kang-Sug Jo1, Youngsup Song2, Kyunggon Kim3 and Sang-Wook Kang1,*

1Department of Biochemistry and Molecular Biology, Brain Korea 21 project, University of Ulsan College of Medicine, Asan Medical Center, Seoul, 05505, Republic of Korea.

2Department of Brain Sciences, Brain Korea 21 project, University of Ulsan College of Medicine, Asan Medical Center, Seoul, 05505, Republic of Korea.

3Department of Digital Medicine, Brain Korea 21 project, University of Ulsan College of Medicine, Asan Medical Center, Seoul, 05505, Republic of Korea.

*To whom correspondence should be addressed:

Sang-Wook Kang, Ph. D.

Department of Biochemistry and Molecular Biology

University of Ulsan College of Medicine

88, Olympic-ro 43gil, Songpa-gu, Seoul 05505

Republic of Korea,

Tel.: +82-2-3010-2205

Fax: +82-2-3010-5307

E- mail: swkang@amc.seoul.kr

**[Supplementary Table Legends]**

**Supplementary Table S1. Raw proteomics dataset for TurboID-based comparison of WT and ΔEMC cells**

This table lists all 2,884 proteins quantified by TurboID-based proximity labeling and mass spectrometry in WT and ΔEMC cells expressing ER-targeted TurboID. Proteins were retained if they met quality thresholds of combined *q*-value (FDR) < 0.01 and sequence coverage ≥ 5%. Reported parameters include UniProt accession, protein description, sequence coverage, protein length, grouped abundance values for WT and ΔEMC samples, log₂ fold change (ΔEMC/WT), and adjusted *p*-values. Functional categories are indicated by color annotations consistent with Tables S2 and S3: EMC subunits (yellow); two established EMC-dependent tail-anchored proteins (green); membrane-associated factors involved in early secretory pathway function and membrane protein biogenesis (blue); and Immediate Early Response 3 Interacting Protein 1 (IER3IP1)—the most strongly reduced ER-resident protein upon EMC loss—(red, bold). Data represent *n* = 3 independent biological replicates and constitute the full, quality-controlled proteome used for subsequent filtered analyses (Table S2) and enrichment assessment (Table S3).

**Supplementary Table S2. Secretory and membrane proteins filtered from the full dataset presented in Table S1**

This table lists 784 secretory and membrane proteins extracted from the complete proximity-labeling proteomics dataset shown in Table S1. Proteins included in this table were first subjected to the same quality-control criteria used for the global dataset (combined *q*-value < 0.01 and sequence coverage ≥ 5%) and were subsequently filtered based on annotated subcellular localization, predicted signal peptides, or the presence of one or more transmembrane domains.

**Supplementary Table S3. Proteins enriched in WT relative to ΔEMC under a defined statistical threshold**

This table catalogs proteins that are more abundant or more efficiently biotinylated in WT cells compared with ΔEMC cells, identified using a statistical threshold of log₂ fold change ≥ 0.5 and *p* < 0.20. These criteria were selected to capture a broader set of EMC-influenced proteins beyond the high-confidence secretory and membrane subset presented in Table S2, thereby enabling identification of proteins whose abundance, membrane insertion, or ER-proximal residency is partially dependent on EMC activity. All entries were derived from the full TurboID-based proteomics dataset summarized in Table S1 and were subjected to the same quality-control filters, including combined *q*-value < 0.01 and sequence coverage ≥ 5%.

**[Supplementary Figure Legends]**

**Supplementary Figure S1. Development and validation of the ER-targeted TurboID system for identifying EMC clients**

**(A)** A doxycycline-inducible, ER-targeted TurboID construct (BiP–V5–TurboID–KDEL) was stably integrated into Flp-In T-REx 293T cells. After induction (+Dox, 24 h), cells were pulse-labeled with [³⁵S]-methionine and exposed to biotin (50 µM) for the indicated times. Total lysates and streptavidin (SA) pull-down fractions were analyzed by SDS–PAGE and SA blotting, confirming biotin-dependent labeling of ER proteins.

**(B)** Cells expressing ER–TurboID were incubated ± biotin (50 µM, 30 min) and stained for Sec61β (ER marker, blue), V5 (TurboID, green), and biotinylated proteins (SA–Alexa 594, red). Confocal imaging verified that labeling was confined to the ER. Scale bar, 10 µm.

**(C)** WT and ΔEMC5 cells coexpressing HA-tagged OPT reporters (SQS, Cb5) were treated with PNGase F and immunoblotted. EMC loss reduced glycosylation and membrane insertion of SQS and Cb5, confirming EMC dependency.

**(D)** WT and ΔEMC cells expressing ER–TurboID were treated with 0.015% digitonin to permeabilize the plasma membrane and remove cytosol, followed by 2% digitonin to extract membrane proteins. Biotinylated proteins were isolated on SA beads for subsequent analysis.

**(E)** A rank-ordered plot shows log₂ fold changes (ΔEMC/WT) for all biotinylated proteins identified by ER-targeted TurboID. Most ER-resident and membrane-associated proteins (gray) displayed minimal change upon EMC loss, with V5-TurboID itself serving as an internal reference (open circle). Known EMC subunits (EMC1–10) and established EMC clients (e.g., SQS) were selectively depleted in ΔEMC cells (blue). Notably, IER3IP1 (red) was among the most strongly reduced proteins, falling well below the −1.0 log₂FC threshold (shaded region), consistent with its strict dependence on EMC-mediated membrane insertion.

**Supplementary Figure S2. Validation of EMC-dependent membrane insertion and stability of IER3IP1**

**(A)** Whole-cell lysates from WT, ΔEMC (ΔE), and ΔIER3IP1 (ΔI) 293T cells were immunoblotted for EMC subunits (EMC2, 4, 5, 7, 8, 10). Loss of EMC5 destabilized the complex, confirming disassembly in ΔEMC cells.

**(B)** WT and mutant IER3IP1–OPT constructs carrying N-, C-, or dual luminal glycosylation tags were translated in vitro ± canine rough microsomes (CRM). Filled dots indicate glycosylated species, with dot number corresponding to the number of N-linked glycans added, whereas open dots denote unglycosylated species.

**(C)** WT and ΔE cells expressing IER3IP1–V5 constructs containing OPT tags at the indicated positions were pulse-labeled and immunoprecipitated. Reduced glycosylation, accompanied by diminished synthesis in ΔE cells, confirmed that efficient membrane insertion requires the EMC

**(D)** WT and ΔEMC cells expressing IER3IP1 were pretreated ± MG132 (1 µM, 12 h) and pulse-labeled with [³⁵S]-Met/Cys in the continued presence or absence of MG132 (1 µM, 30 min). Anti-IER3IP1 immunoprecipitates were analyzed by SDS–PAGE and autoradiography. Newly synthesized IER3IP1 was markedly reduced in ΔEMC cells but restored by proteasome inhibition, indicating proteasome-dependent degradation of uninserted IER3IP1.

**Supplementary Figure S3. Immunofluorescence analysis of CLU trafficking and Golgi morphology in IER3IP1-deficient cells**

**(A)** WT cells expressing CLU–SBP–GFP were incubated with ± biotin (40 µM, 1 h) to synchronize ER-to-Golgi transport. Cells were fixed and stained for GM130 (red) and nuclei (DAPI, blue). CLU (green) redistributed from the ER to GM130-positive Golgi compartments upon biotin addition, confirming biotin-dependent cargo release. Scale bar, 10 µm.

**(B)** WT and ΔIER3IP1 cells were left untreated, treated with BFA (5 µg/mL, 1 h), or allowed to recover (2 h). Cells stained for GM130 (red) and DAPI (blue) showed BFA-induced Golgi dispersal and recovery, indicating that IER3IP1 loss does not impair global Golgi reassembly. Scale bar, 10 µm.

**Supplementary Figure S4. IER3IP1-dependent trafficking of CLU and PrP**

**(A)** Schematic overview of CLU maturation and its visualization by pulse–chase analysis. Cells expressing CLU-HA were pulse-labeled with [³⁵S]-methionine to visualize ER-localized precursors (CLUα/β, ~65 kDa) and Golgi-processed β subunits (CLUβ, ~35 kDa) after immunoprecipitation with anti-HA under non-reducing and reducing conditions.

**(B)** CLU–RUSH cells pretreated with BFA (5 µg/mL, 30 min; middle) or left untreated (top) were pulse-labeled with [³⁵S]-methionine for 30 min and chased for the indicated times in the presence of biotin. BFA acutely blocked CLU processing, whereas removal of the drug restored α/β cleavage (bottom), confirming that CLU maturation is Golgi dependent.

**(C)** CLU–RUSH cells were pulse-chased as in (B). Culture media collected at each chase point were subjected to immunoprecipitation with anti-HA antibody to isolate secreted CLUβ. Autoradiography revealed efficient release of CLUβ into the medium, with robust secretion evident within 1 h of chase.

**(D)** WT and ΔIER3IP1 cells expressing PrP were pulse-labeled and chased for the indicated times. ΔIER3IP1 cells accumulated immature ER-glycosylated PrP (PrPER), whereas mature, fully glycosylated post-ER PrP (PrPpost-ER) predominated in WT cells, indicating defective anterograde transport.

**(E)** ΔIER3IP1 cells transfected with IER3IP1–V5 were immunoblotted with anti-V5 and anti-TRAPα, confirming re-expression.

**(F)** ΔIER3IP1 and ΔEMC cells coexpressing CLU–SBP–GFP and IER3IP1–V5 were imaged with ± biotin (1 h). CLU trafficking was restored upon IER3IP1 re-expression in both lines, rescuing EMC-dependent secretory defects. Arrowheads indicate Golgi-localized CLU. Scale bar, 10 µm.

**Supplementary Figure S5. TMD-mediated IER3IP1 association and its regulation by ER export**

**(A)** WT and C15A IER3IP1–FLAG were expressed and treated with BMH (0–200 µM, 1 h, RT). Crosslinked products were detected by direct immunoblotting or after FLAG immunoprecipitation. Higher-molecular-weight bands (*) indicated BMH-dependent covalent association of IER3IP1.

**(B)** WT and ΔEMC cells expressing WT or cysteine-mutant IER3IP1 (C15A, V65C) were crosslinked with BMH (200 µM, 1 h, RT) and probed with anti-FLAG. Crosslinked species (N-XL, C-XL) remained detectable in ΔEMC cells, showing that EMC loss does not disrupt TMD-mediated association. TRAPα was used as a loading control, while loss of EMC5 confirmed EMC deficiency

**Supplementary Figure S6. Effects of the A18V variant on IER3IP1 and CLU trafficking**

**(A)** Cells expressing WT or A18V IER3IP1–FLAG constructs appended with OPT tags at the indicated termini were pulse-labeled, immunoprecipitated with anti-FLAG, and analyzed by SDS–PAGE and autoradiography. Similar glycosylated species (filled dots) in WT and A18V indicated unaltered membrane insertion efficiency.

**(B, D)** ΔIER3IP1 (B) and ΔEMC (D) cells expressing WT or A18V IER3IP1–FLAG were immunoblotted with anti-FLAG and anti-TRAPα. A18V expression was comparable to WT in both backgrounds.

**(C, E)** ΔIER3IP1 (C) and ΔEMC (E) cells coexpressing CLU–SBP–HA and WT or A18V IER3IP1 were pulse-labeled and chased for the indicated times. Anti-HA immunoprecipitates analyzed by SDS–PAGE and autoradiography showed a modest increase of CLUα/β–HA with A18V, indicating partially impaired ER-to-Golgi transport.
