# Supplementary material for: EMC-dependent membrane insertion of IER3IP1 sustains efficient ER-to-Golgi trafficking
Source: Research Square preprint supplement (doi:10.21203/rs.3.rs-8560191/v1), 2026-02-11
Supplement: Supplementary file 4 [file 5bd7320aa0c7ac13cd071d5a.xlsx]

## Sheet: MP & SP (coverage>5%)
Accession	Protein Description	q_value	Coverage (%)	Peptides	Unique Peptides	Amino Acids	Abundance Ratio (log2): DEMC/WT	Abundance Ratio Adj. P-Value (-log10): DEMC/WT	Abundance WT	Abundance DEMC
Q9Y5U9	Immediate early response 3-interacting protein 1 OS=Homo sapiens OX=9606 GN=IER3IP1 PE=1 SV=1	0	24	1	1	82	-9.96578	15.3133	200
H0Y2P9	Phosphatidylinositol-glycan biosynthesis class X protein OS=Homo sapiens OX=9606 GN=PIGX PE=1 SV=1	0.002	7	1	1	276	-9.96578	15.3133	200
O60512	Beta-1,4-galactosyltransferase 3 OS=Homo sapiens OX=9606 GN=B4GALT3 PE=1 SV=2	0.001	6	1	1	393	-9.96578	15.3133	200
Q8N4V1-2	Isoform 2 of Membrane magnesium transporter 1 OS=Homo sapiens OX=9606 GN=MMGT1	0	12	1	1	196	-2.2966	13.6682	166.2	33.8
Q5J8M3	ER membrane protein complex subunit 4 OS=Homo sapiens OX=9606 GN=EMC4 PE=1 SV=2	0	34	4	4	183	-1.89336	8.17904	159.4	40.6
Q9P0I2	ER membrane protein complex subunit 3 OS=Homo sapiens OX=9606 GN=EMC3 PE=1 SV=3	0	47	8	8	261	-1.83188	8.37521	159.1	40.9
Q9BV81	ER membrane protein complex subunit 6 OS=Homo sapiens OX=9606 GN=EMC6 PE=1 SV=1	0	12	2	2	110	-1.50843	5.38558	147.6	52.4
M0R2A0	ER membrane protein complex subunit 10 OS=Homo sapiens OX=9606 GN=EMC10 PE=1 SV=1	0	8	3	3	371	-1.29572	4.2213	144.1	55.9
P12763	Alpha-2-HS-glycoprotein OS=Bos taurus GN=AHSG PE=1 SV=2	0	9	2	2	359	-1.12631	1.59595	73.7	126.3
Q9NPA0	ER membrane protein complex subunit 7 OS=Homo sapiens OX=9606 GN=EMC7 PE=1 SV=1	0	40	6	6	242	-1.02006	2.09887	131	69
Q7Z3D4	LysM and putative peptidoglycan-binding domain-containing protein 3 OS=Homo sapiens OX=9606 GN=LYSMD3 PE=1 SV=2	0	20	3	3	306	-0.992043	1.87883	135.5	64.5
Q8NI22	Multiple coagulation factor deficiency protein 2 OS=Homo sapiens OX=9606 GN=MCFD2 PE=1 SV=1	0.001	12	1	1	146	-0.952334	1.09464	131.9	68.1
Q8N766	ER membrane protein complex subunit 1 OS=Homo sapiens OX=9606 GN=EMC1 PE=1 SV=1	0	38	26	26	993	-0.903038	1.8145	130.3	69.7
P01033	Metalloproteinase inhibitor 1 OS=Homo sapiens OX=9606 GN=TIMP1 PE=1 SV=1	0.006	6	1	1	207	-0.807355	1.18576	127.3	72.7
Q8WUF8	Cotranscriptional regulator FAM172A OS=Homo sapiens OX=9606 GN=FAM172A PE=2 SV=1	0	6	2	2	416	-0.792439	0.693728	127.1	72.9
Q9BWS9-3	Isoform 3 of Chitinase domain-containing protein 1 OS=Homo sapiens OX=9606 GN=CHID1	0	38	10	1	362	-0.761285	0.582178	125.8	74.2
Q6NSJ5	Volume-regulated anion channel subunit LRRC8E OS=Homo sapiens OX=9606 GN=LRRC8E PE=1 SV=2	0	26	14	14	796	-0.738119	0.864979	115.8	84.2
E7EPA6	Laminin subunit beta-1 OS=Homo sapiens OX=9606 GN=LAMB1 PE=1 SV=1	0	36	16	1	850	-0.719841	0.505099	124.9	75.1
Q13740	CD166 antigen OS=Homo sapiens OX=9606 GN=ALCAM PE=1 SV=2	0	5	2	2	583	-0.70044	0.612985	125.4	74.6
P06276	Cholinesterase OS=Homo sapiens OX=9606 GN=BCHE PE=1 SV=1	0	10	4	4	602	-0.698663	0.818795	123.2	76.8
P00167	Cytochrome b5 OS=Homo sapiens OX=9606 GN=CYB5A PE=1 SV=2	0	33	3	3	134	-0.688852	0.764569	123.2	76.8
P37268	Squalene synthase OS=Homo sapiens OX=9606 GN=FDFT1 PE=1 SV=1	0	32	10	10	417	-0.680774	0.800025	120.1	79.9
Q9H497	Torsin-3A OS=Homo sapiens OX=9606 GN=TOR3A PE=1 SV=1	0	30	10	10	397	-0.632268	0.64773	117.7	82.3
P58166	Inhibin beta E chain OS=Homo sapiens OX=9606 GN=INHBE PE=1 SV=1	0	12	3	3	350	-0.608809	0.551519	123.7	76.3
Q9H2C2	Protein ARV1 OS=Homo sapiens OX=9606 GN=ARV1 PE=1 SV=1	0	11	2	2	271	-0.602172	0.457686	153.9	46.1
Q9UBS3	DnaJ homolog subfamily B member 9 OS=Homo sapiens OX=9606 GN=DNAJB9 PE=1 SV=1	0	28	4	4	223	-0.601221	0.585492	119.1	80.9
Q92626	Peroxidasin homolog OS=Homo sapiens OX=9606 GN=PXDN PE=1 SV=2	0	12	12	12	1479	-0.599318	0.6333	120.7	79.3
O75973	C1q-related factor OS=Homo sapiens OX=9606 GN=C1QL1 PE=1 SV=1	0.006	7	1	1	258	-0.596458	0.289651	120.4	79.6
P10620	Microsomal glutathione S-transferase 1 OS=Homo sapiens OX=9606 GN=MGST1 PE=1 SV=1	0	26	3	3	155	-0.588805	0.513861	119.5	80.5
Q96S66	Chloride channel CLIC-like protein 1 OS=Homo sapiens OX=9606 GN=CLCC1 PE=1 SV=1	0	18	8	8	551	-0.588805	0.584714	116.9	83.1
Q9HBL7	Plasminogen receptor (KT) OS=Homo sapiens OX=9606 GN=PLGRKT PE=1 SV=1	0	12	2	2	147	-0.568519	0.559554	119.1	80.9
Q92611	ER degradation-enhancing alpha-mannosidase-like protein 1 OS=Homo sapiens OX=9606 GN=EDEM1 PE=1 SV=1	0	9	5	5	657	-0.547943	0.41617	132.9	67.1
Q9HD20	Manganese-transporting ATPase 13A1 OS=Homo sapiens OX=9606 GN=ATP13A1 PE=1 SV=2	0	5	5	5	1204	-0.54201	0.417326	116	84
Q5JRA6	Transport and Golgi organization protein 1 homolog OS=Homo sapiens OX=9606 GN=MIA3 PE=1 SV=1	0	48	64	64	1907	-0.530071	0.441099	119	81
O15173-2	Isoform 2 of Membrane-associated progesterone receptor component 2 OS=Homo sapiens OX=9606 GN=PGRMC2	0	37	10	9	247	-0.530071	0.438369	123.7	76.3
Q9Y680	Peptidyl-prolyl cis-trans isomerase FKBP7 OS=Homo sapiens OX=9606 GN=FKBP7 PE=1 SV=2	0	28	6	6	222	-0.525067	0.432425	116.4	83.6
Q6ZXV5	Protein O-mannosyl-transferase TMTC3 OS=Homo sapiens OX=9606 GN=TMTC3 PE=1 SV=2	0	33	23	22	915	-0.520045	0.418988	117.3	82.7
P26022	Pentraxin-related protein PTX3 OS=Homo sapiens OX=9606 GN=PTX3 PE=1 SV=3	0	10	3	3	381	-0.512985	0.332688	114.9	85.1
E9PCX5	Transmembrane protein 161B OS=Homo sapiens OX=9606 GN=TMEM161B PE=1 SV=1	0	7	3	3	502	-0.499782	0.337317	118.4	81.6
Q8TEQ8	GPI ethanolamine phosphate transferase 3 OS=Homo sapiens OX=9606 GN=PIGO PE=1 SV=3	0	21	18	17	1089	-0.495695	0.361328	116	84
Q9HAT2	Sialate O-acetylesterase OS=Homo sapiens OX=9606 GN=SIAE PE=1 SV=1	0	10	4	4	523	-0.493647	0.281505	102.3	97.7
Q9HDC5	Junctophilin-1 OS=Homo sapiens OX=9606 GN=JPH1 PE=1 SV=2	0	17	7	7	661	-0.492622	0.339978	111.5	88.5
Q5VV89	Microsomal glutathione S-transferase 3 OS=Homo sapiens OX=9606 GN=MGST3 PE=1 SV=1	0	16	2	2	166	-0.483364	0.306153	117.4	82.6
Q9Y3E0	Vesicle transport protein GOT1B OS=Homo sapiens OX=9606 GN=GOLT1B PE=1 SV=1	0.004	10	1	1	138	-0.480265	0.129299	113.6	86.4
Q9H1B5	Xylosyltransferase 2 OS=Homo sapiens OX=9606 GN=XYLT2 PE=1 SV=2	0	9	6	6	865	-0.479231	0.25913	116.3	83.7
O60858-3	Isoform 3 of E3 ubiquitin-protein ligase TRIM13 OS=Homo sapiens OX=9606 GN=TRIM13	0	6	2	2	410	-0.477159	0.193628	118.2	81.8
O00767	Acyl-CoA desaturase OS=Homo sapiens OX=9606 GN=SCD PE=1 SV=2	0	11	3	3	359	-0.449957	0.230039	118.8	81.2
A0A3B3IUB5	Minor histocompatibility antigen H13 OS=Homo sapiens OX=9606 GN=HM13 PE=1 SV=1	0	14	5	5	420	-0.447844	0.216464	115.4	84.6
F8W031	DUF3456 domain-containing protein (Fragment) OS=Homo sapiens OX=9606 PE=1 SV=1	0	10	2	2	263	-0.446786	0.204558	112.5	87.5
Q6UX07	Dehydrogenase/reductase SDR family member 13 OS=Homo sapiens OX=9606 GN=DHRS13 PE=2 SV=1	0	9	3	3	377	-0.441483	0.150933	131.4	68.6
Q86YL7-3	Isoform 3 of Podoplanin OS=Homo sapiens OX=9606 GN=PDPN	0.003	14	1	1	238	-0.439357	0.195655	115.1	84.9
Q96HD1-2	Isoform 2 of Protein disulfide isomerase CRELD1 OS=Homo sapiens OX=9606 GN=CRELD1	0	18	4	4	422	-0.428678	0.193036	117	83
O14786	Neuropilin-1 OS=Homo sapiens OX=9606 GN=NRP1 PE=1 SV=3	0	6	4	4	923	-0.428678	0.202318	130.4	69.6
Q9GZP9	Derlin-2 OS=Homo sapiens OX=9606 GN=DERL2 PE=1 SV=1	0.001	5	1	1	239	-0.421156	0.210496	114.2	85.8
Q5T8D3-3	Isoform 3 of Acyl-CoA-binding domain-containing protein 5 OS=Homo sapiens OX=9606 GN=ACBD5	0	18	7	7	525	-0.420078	0.21212	112.2	87.8
Q8N2A8	Mitochondrial cardiolipin hydrolase OS=Homo sapiens OX=9606 GN=PLD6 PE=1 SV=1	0.001	5	1	1	252	-0.418999	0.0903073	112	88
Q9ULK5	Vang-like protein 2 OS=Homo sapiens OX=9606 GN=VANGL2 PE=1 SV=2	0	10	4	4	521	-0.41684	0.201451	114.7	85.3
Q9BVX2	Transmembrane protein 106C OS=Homo sapiens OX=9606 GN=TMEM106C PE=1 SV=1	0	20	2	2	250	-0.412511	0.193628	114.3	85.7
P00750	Tissue-type plasminogen activator OS=Homo sapiens OX=9606 GN=PLAT PE=1 SV=1	0	11	4	4	562	-0.408168	0.177148	112.9	87.1
O43169	Cytochrome b5 type B OS=Homo sapiens OX=9606 GN=CYB5B PE=1 SV=3	0	49	4	4	150	-0.397255	0.163702	115.5	84.5
Q9NT22	EMILIN-3 OS=Homo sapiens OX=9606 GN=EMILIN3 PE=1 SV=2	0	5	2	2	766	-0.392867	0.0970969	114.7	85.3
Q9Y320	Thioredoxin-related transmembrane protein 2 OS=Homo sapiens OX=9606 GN=TMX2 PE=1 SV=1	0	11	3	3	296	-0.391768	0.154078	112.9	87.1
P51572-2	Isoform 2 of B-cell receptor-associated protein 31 OS=Homo sapiens OX=9606 GN=BCAP31	0	5	1	1	313	-0.381837	0.13164	105.9	94.1
O75460	Serine/threonine-protein kinase/endoribonuclease IRE1 OS=Homo sapiens OX=9606 GN=ERN1 PE=1 SV=2	0	29	18	18	977	-0.379621	0.156831	116.1	83.9
A6XMV9	Protease serine 2 preproprotein OS=Homo sapiens OX=9606 GN=PRSS2 PE=1 SV=1	0.001	8	1	1	261	-0.37629	0.142427	113	87
O15258	Protein RER1 OS=Homo sapiens OX=9606 GN=RER1 PE=1 SV=1	0	30	4	4	196	-0.375178	0.131077	112.6	87.4
P56730	Neurotrypsin OS=Homo sapiens OX=9606 GN=PRSS12 PE=2 SV=2	0	10	7	7	875	-0.372952	0.123116	112.5	87.5
Q9BRK5	45 kDa calcium-binding protein OS=Homo sapiens OX=9606 GN=SDF4 PE=1 SV=1	0	27	6	6	362	-0.371838	0.140389	112	88
P78348-1	Isoform 1 of Acid-sensing ion channel 1 OS=Homo sapiens OX=9606 GN=ASIC1	0	11	5	5	574	-0.370722	0.126608	109.2	90.8
Q9UL54-2	Isoform 2 of Serine/threonine-protein kinase TAO2 OS=Homo sapiens OX=9606 GN=TAOK2	0	21	16	5	1049	-0.367371	0.121002	112.8	87.2
P56159	GDNF family receptor alpha-1 OS=Homo sapiens OX=9606 GN=GFRA1 PE=1 SV=2	0	9	3	3	465	-0.367371	0.116444	111.7	88.3
Q96PC5	Melanoma inhibitory activity protein 2 OS=Homo sapiens OX=9606 GN=MIA2 PE=1 SV=4	0	28	32	32	1412	-0.366252	0.134825	104.8	95.2
Q9BVK6	Transmembrane emp24 domain-containing protein 9 OS=Homo sapiens OX=9606 GN=TMED9 PE=1 SV=2	0	26	5	4	235	-0.362891	0.129639	113.5	86.5
Q6MZW2	Follistatin-related protein 4 OS=Homo sapiens OX=9606 GN=FSTL4 PE=2 SV=3	0	5	3	3	842	-0.362891	0.115465	122.5	77.5
Q8N6G5	Chondroitin sulfate N-acetylgalactosaminyltransferase 2 OS=Homo sapiens OX=9606 GN=CSGALNACT2 PE=1 SV=1	0	5	2	2	542	-0.359521	0.0903073	110.2	89.8
Q96CP6	Protein Aster-A OS=Homo sapiens OX=9606 GN=GRAMD1A PE=1 SV=2	0	42	22	21	724	-0.35727	0.123116	112.1	87.9
P81605-2	Isoform 2 of Dermcidin OS=Homo sapiens OX=9606 GN=DCD	0.001	9	1	1	121	-0.355016	0.118929	112.2	87.8
Q6P9A2	Polypeptide N-acetylgalactosaminyltransferase 18 OS=Homo sapiens OX=9606 GN=GALNT18 PE=2 SV=2	0	6	3	3	607	-0.348232	0.0999002	112.3	87.7
P35625	Metalloproteinase inhibitor 3 OS=Homo sapiens OX=9606 GN=TIMP3 PE=1 SV=2	0	32	6	6	211	-0.343692	0.112475	113.6	86.4
P49257	Protein ERGIC-53 OS=Homo sapiens OX=9606 GN=LMAN1 PE=1 SV=2	0	34	11	11	510	-0.342555	0.120546	117.3	82.7
O15269	Serine palmitoyltransferase 1 OS=Homo sapiens OX=9606 GN=SPTLC1 PE=1 SV=1	0	10	3	3	473	-0.342555	0.0968316	109	91
A0A087WU53	Magnesium transporter protein 1 OS=Homo sapiens OX=9606 GN=MAGT1 PE=1 SV=1	0	9	3	3	367	-0.342555	0.0999002	111.3	88.7
P30532	Neuronal acetylcholine receptor subunit alpha-5 OS=Homo sapiens OX=9606 GN=CHRNA5 PE=1 SV=2	0	6	2	2	468	-0.342555	0.0953722	111.1	88.9
Q9ULH0	Kinase D-interacting substrate of 220 kDa OS=Homo sapiens OX=9606 GN=KIDINS220 PE=1 SV=3	0	14	20	20	1771	-0.337996	0.0992351	108.4	91.6
Q9H6E4	Coiled-coil domain-containing protein 134 OS=Homo sapiens OX=9606 GN=CCDC134 PE=1 SV=1	0	31	5	5	229	-0.336855	0.0992351	110.5	89.5
Q9P2W9	Syntaxin-18 OS=Homo sapiens OX=9606 GN=STX18 PE=1 SV=1	0.004	5	1	1	335	-0.336855	0.0545145	116.8	83.2
P10253	Lysosomal alpha-glucosidase OS=Homo sapiens OX=9606 GN=GAA PE=1 SV=4	0	17	9	9	952	-0.335712	0.110283	126.2	73.8
Q8WY22	BRI3-binding protein OS=Homo sapiens OX=9606 GN=BRI3BP PE=1 SV=1	0	8	1	1	251	-0.334568	0.0910299	113.6	86.4
Q8IVL5	Prolyl 3-hydroxylase 2 OS=Homo sapiens OX=9606 GN=P3H2 PE=1 SV=1	0	12	7	7	708	-0.331132	0.0824291	111.6	88.4
Q9H3G5	Probable serine carboxypeptidase CPVL OS=Homo sapiens OX=9606 GN=CPVL PE=1 SV=2	0	32	12	12	476	-0.329985	0.117063	110.5	89.5
Q15363	Transmembrane emp24 domain-containing protein 2 OS=Homo sapiens OX=9606 GN=TMED2 PE=1 SV=1	0	14	2	2	201	-0.326537	0.0929804	110.2	89.8
Q15629	Translocating chain-associated membrane protein 1 OS=Homo sapiens OX=9606 GN=TRAM1 PE=1 SV=3	0	16	5	5	374	-0.324235	0.0869703	110.6	89.4
Q03167	Transforming growth factor beta receptor type 3 OS=Homo sapiens OX=9606 GN=TGFBR3 PE=1 SV=3	0	6	3	3	851	-0.321928	0.0763048	105.2	94.8
Q12860	Contactin-1 OS=Homo sapiens OX=9606 GN=CNTN1 PE=1 SV=1	0	5	3	3	1018	-0.319618	0.0545145	113.8	86.2
O94919	Endonuclease domain-containing 1 protein OS=Homo sapiens OX=9606 GN=ENDOD1 PE=1 SV=2	0	28	11	11	500	-0.317304	0.085525	113.5	86.5
Q96GC9	Vacuole membrane protein 1 OS=Homo sapiens OX=9606 GN=VMP1 PE=1 SV=1	0	9	2	2	406	-0.317304	0.0612914	110.4	89.6
Q5SZK8	FRAS1-related extracellular matrix protein 2 OS=Homo sapiens OX=9606 GN=FREM2 PE=1 SV=2	0	7	13	13	3169	-0.316146	0.0714542	110.5	89.5
Q8NCL4	Polypeptide N-acetylgalactosaminyltransferase 6 OS=Homo sapiens OX=9606 GN=GALNT6 PE=2 SV=2	0	6	3	3	622	-0.314986	0.0766082	113	87
Q6PK18	2-oxoglutarate and iron-dependent oxygenase domain-containing protein 3 OS=Homo sapiens OX=9606 GN=OGFOD3 PE=1 SV=2	0	16	3	3	319	-0.311503	0.0638904	80.1	119.9
Q9Y385	Ubiquitin-conjugating enzyme E2 J1 OS=Homo sapiens OX=9606 GN=UBE2J1 PE=1 SV=2	0	31	7	7	318	-0.31034	0.0767395	123.7	76.3
Q13438	Protein OS-9 OS=Homo sapiens OX=9606 GN=OS9 PE=1 SV=1	0	43	23	23	667	-0.304511	0.0720924	108.9	91.1
Q8TC12	Retinol dehydrogenase 11 OS=Homo sapiens OX=9606 GN=RDH11 PE=1 SV=2	0	24	5	5	318	-0.301002	0.0605344	111.1	88.9
Q5T4B2	Inactive glycosyltransferase 25 family member 3 OS=Homo sapiens OX=9606 GN=CERCAM PE=1 SV=1	0	13	5	5	595	-0.301002	0.0570828	114.3	85.7
Q14318-2	Isoform 2 of Peptidyl-prolyl cis-trans isomerase FKBP8 OS=Homo sapiens OX=9606 GN=FKBP8	0	22	6	6	413	-0.298658	0.0720924	109.7	90.3
P48357	Leptin receptor OS=Homo sapiens OX=9606 GN=LEPR PE=1 SV=2	0	10	7	7	1165	-0.295135	0.0763298	119.8	80.2
Q8NCS4	Transmembrane protein 35B OS=Homo sapiens OX=9606 GN=TMEM35B PE=1 SV=1	0.004	8	1	1	154	-0.295135	0.0519828	103.8	96.2
Q969L2	Protein MAL2 OS=Homo sapiens OX=9606 GN=MAL2 PE=1 SV=1	0.001	6	1	1	176	-0.295135	0.0486671	109.3	90.7
P80303	Nucleobindin-2 OS=Homo sapiens OX=9606 GN=NUCB2 PE=1 SV=3	0	31	9	9	420	-0.293959	0.0639518	110.5	89.5
A0A0C4DFZ2	Arylsulfatase A OS=Homo sapiens OX=9606 GN=ARSA PE=1 SV=1	0	11	3	3	509	-0.292782	0.0545145	115.8	84.2
Q9HCU5	Prolactin regulatory element-binding protein OS=Homo sapiens OX=9606 GN=PREB PE=1 SV=2	0	58	15	15	417	-0.290424	0.0621437	111.3	88.7
P17050	Alpha-N-acetylgalactosaminidase OS=Homo sapiens OX=9606 GN=NAGA PE=1 SV=2	0	12	3	3	411	-0.290424	0.0545145	109.4	90.6
Q09328	Alpha-1,6-mannosylglycoprotein 6-beta-N-acetylglucosaminyltransferase A OS=Homo sapiens OX=9606 GN=MGAT5 PE=1 SV=1	0	7	4	4	741	-0.290424	0.0621437	108.2	91.8
Q9H0X9	Oxysterol-binding protein-related protein 5 OS=Homo sapiens OX=9606 GN=OSBPL5 PE=1 SV=1	0	8	6	4	879	-0.289244	0.0570828	108.4	91.6
Q9HCB6	Spondin-1 OS=Homo sapiens OX=9606 GN=SPON1 PE=1 SV=2	0	10	4	4	807	-0.285698	0.0545145	114.6	85.4
O95214-2	Isoform 2 of Leptin receptor overlapping transcript-like 1 OS=Homo sapiens OX=9606 GN=LEPROTL1	0.001	8	1	1	169	-0.285698	0.0545145	109.9	90.1
Q9UBS9	SUN domain-containing ossification factor OS=Homo sapiens OX=9606 GN=SUCO PE=1 SV=1	0	24	21	21	1254	-0.284514	0.0570828	110.3	89.7
P04066	Tissue alpha-L-fucosidase OS=Homo sapiens OX=9606 GN=FUCA1 PE=1 SV=4	0	5	2	2	466	-0.283329	0.0347121	109.8	90.2
Q63HQ2-2	Isoform 2 of Pikachurin OS=Homo sapiens OX=9606 GN=EGFLAM	0	5	4	4	1009	-0.283329	0.0545145	111.2	88.8
Q9NWM8	Peptidyl-prolyl cis-trans isomerase FKBP14 OS=Homo sapiens OX=9606 GN=FKBP14 PE=1 SV=1	0	12	2	2	211	-0.282143	0.052337	108.1	91.9
A0A140T8X7	Lysosomal thioesterase PPT2 OS=Homo sapiens OX=9606 GN=PPT2 PE=1 SV=1	0	20	4	4	308	-0.280956	0.0545145	136.5	63.5
A0A0G2JH66	HLA class I histocompatibility antigen, alpha chain F OS=Homo sapiens OX=9606 GN=HLA-F PE=1 SV=1	0	24	8	7	442	-0.27858	0.0545145	108.1	91.9
Q6UWY0	Arylsulfatase K OS=Homo sapiens OX=9606 GN=ARSK PE=1 SV=1	0	10	4	4	536	-0.27858	0.0545145	108.5	91.5
A0A499FJK2	Transforming growth factor beta OS=Homo sapiens OX=9606 GN=TGFB1 PE=1 SV=1	0	23	6	6	390	-0.27739	0.0556471	110.1	89.9
P54289	Voltage-dependent calcium channel subunit alpha-2/delta-1 OS=Homo sapiens OX=9606 GN=CACNA2D1 PE=1 SV=3	0	18	15	14	1103	-0.27739	0.0570828	105.5	94.5
Q9NV64	Transmembrane protein 39A OS=Homo sapiens OX=9606 GN=TMEM39A PE=2 SV=1	0	13	3	3	488	-0.275007	0.0545145	120.2	79.8
P13611	Versican core protein OS=Homo sapiens OX=9606 GN=VCAN PE=1 SV=3	0	6	15	15	3396	-0.275007	0.0559804	112.1	87.9
Q96AY3	Peptidyl-prolyl cis-trans isomerase FKBP10 OS=Homo sapiens OX=9606 GN=FKBP10 PE=1 SV=1	0	30	13	13	582	-0.27023	0.0545145	105.4	94.6
O75487	Glypican-4 OS=Homo sapiens OX=9606 GN=GPC4 PE=1 SV=4	0	30	11	10	556	-0.269033	0.0621437	108.2	91.8
O43909	Exostosin-like 3 OS=Homo sapiens OX=9606 GN=EXTL3 PE=1 SV=1	0	19	13	13	919	-0.269033	0.0545145	110.1	89.9
Q99941	Cyclic AMP-dependent transcription factor ATF-6 beta OS=Homo sapiens OX=9606 GN=ATF6B PE=1 SV=2	0	27	13	13	703	-0.267835	0.0550855	110.9	89.1
Q96NU0	Contactin-associated protein-like 3B OS=Homo sapiens OX=9606 GN=CNTNAP3B PE=2 SV=3	0	6	6	6	1288	-0.267835	0.052337	116.5	83.5
P18084	Integrin beta-5 OS=Homo sapiens OX=9606 GN=ITGB5 PE=1 SV=1	0	18	9	9	799	-0.266637	0.0545145	107	93
Q9ULS5	Transmembrane and coiled-coil domain protein 3 OS=Homo sapiens OX=9606 GN=TMCC3 PE=1 SV=3	0	23	8	8	477	-0.265437	0.0539907	109.7	90.3
E7ESP4	Integrin alpha-2 OS=Homo sapiens OX=9606 GN=ITGA2 PE=1 SV=1	0	15	10	10	942	-0.265437	0.0545145	109.6	90.4
P15291	Beta-1,4-galactosyltransferase 1 OS=Homo sapiens OX=9606 GN=B4GALT1 PE=1 SV=5	0	7	2	2	398	-0.265437	0.0323539	106.9	93.1
Q6P4F1-2	Isoform 2 of Alpha-(1,3)-fucosyltransferase 10 OS=Homo sapiens OX=9606 GN=FUT10	0	7	3	3	520	-0.265437	0.0442058	109.9	90.1
Q6UVY6	DBH-like monooxygenase protein 1 OS=Homo sapiens OX=9606 GN=MOXD1 PE=1 SV=1	0	15	7	7	613	-0.264236	0.0545145	107.2	92.8
P28300	Protein-lysine 6-oxidase OS=Homo sapiens OX=9606 GN=LOX PE=1 SV=2	0	5	2	2	417	-0.264236	0.0347121	110.6	89.4
E9PN30	Selenoprotein S (Fragment) OS=Homo sapiens OX=9606 GN=SELENOS PE=1 SV=1	0	11	2	2	218	-0.263034	0.0528581	109.7	90.3
A8K878	Mesencephalic astrocyte-derived neurotrophic factor OS=Homo sapiens OX=9606 GN=MANF PE=1 SV=1	0	37	6	6	185	-0.261832	0.0545145	107.7	92.3
Q96JJ7	Protein disulfide-isomerase TMX3 OS=Homo sapiens OX=9606 GN=TMX3 PE=1 SV=2	0	26	11	11	454	-0.258217	0.0545145	110	90
Q9BXW7	Haloacid dehalogenase-like hydrolase domain-containing 5 OS=Homo sapiens OX=9606 GN=HDHD5 PE=1 SV=1	0.003	5	2	2	423	-0.258217	0.032823	118.4	81.6
Q8N2K0-2	Isoform 2 of Lysophosphatidylserine lipase ABHD12 OS=Homo sapiens OX=9606 GN=ABHD12	0	27	8	8	404	-0.254594	0.0545145	107.7	92.3
A0A499FI48	Protein disulfide-isomerase OS=Homo sapiens OX=9606 GN=PDIA4 PE=1 SV=1	0	31	15	15	646	-0.252173	0.0511589	109.3	90.7
Q95460	Major histocompatibility complex class I-related gene protein OS=Homo sapiens OX=9606 GN=MR1 PE=1 SV=1	0	17	3	3	341	-0.252173	0.0517523	102.2	97.8
Q99735	Microsomal glutathione S-transferase 2 OS=Homo sapiens OX=9606 GN=MGST2 PE=1 SV=1	0.001	10	1	1	147	-0.252173	0.0472743	108.7	91.3
P33908	Mannosyl-oligosaccharide 1,2-alpha-mannosidase IA OS=Homo sapiens OX=9606 GN=MAN1A1 PE=1 SV=3	0	11	5	5	653	-0.250962	0.0495456	108.7	91.3
Q5BJH7	Protein YIF1B OS=Homo sapiens OX=9606 GN=YIF1B PE=1 SV=1	0	17	3	3	314	-0.249749	0.0472743	109.2	90.8
Q5SU54	HLA class II histocompatibility antigen, DQ beta 1 chain OS=Homo sapiens OX=9606 GN=HLA-DQB1 PE=1 SV=1	0	26	6	6	269	-0.24732	0.0492233	98.2	101.8
P06213	Insulin receptor OS=Homo sapiens OX=9606 GN=INSR PE=1 SV=4	0	11	12	9	1382	-0.24732	0.052337	108.5	91.5
Q8IZA0	Dyslexia-associated protein KIAA0319-like protein OS=Homo sapiens OX=9606 GN=KIAA0319L PE=1 SV=2	0	7	5	5	1049	-0.24732	0.0492905	92.3	107.7
P11021	Endoplasmic reticulum chaperone BiP OS=Homo sapiens OX=9606 GN=HSPA5 PE=1 SV=2	0	50	30	28	654	-0.246104	0.0480385	108.7	91.3
P27797	Calreticulin OS=Homo sapiens OX=9606 GN=CALR PE=1 SV=1	0	48	10	10	417	-0.246104	0.0480043	109.4	90.6
O75581	Low-density lipoprotein receptor-related protein 6 OS=Homo sapiens OX=9606 GN=LRP6 PE=1 SV=2	0	18	22	19	1613	-0.24245	0.0480043	104.7	95.3
Q86SF2	N-acetylgalactosaminyltransferase 7 OS=Homo sapiens OX=9606 GN=GALNT7 PE=1 SV=1	0	30	14	14	657	-0.24123	0.0486671	113.8	86.2
O95470	Sphingosine-1-phosphate lyase 1 OS=Homo sapiens OX=9606 GN=SGPL1 PE=1 SV=3	0	32	13	13	568	-0.238787	0.0457104	106.9	93.1
P18075	Bone morphogenetic protein 7 OS=Homo sapiens OX=9606 GN=BMP7 PE=1 SV=1	0	8	3	3	431	-0.238787	0.0486671	107.3	92.7
Q6YHK3	CD109 antigen OS=Homo sapiens OX=9606 GN=CD109 PE=1 SV=2	0	9	9	9	1445	-0.237564	0.0457104	107.3	92.7
A0A2U3TZE7	Cochlin OS=Homo sapiens OX=9606 GN=COCH PE=1 SV=1	0	12	7	7	615	-0.23634	0.0463451	107.4	92.6
P52848	Bifunctional heparan sulfate N-deacetylase/N-sulfotransferase 1 OS=Homo sapiens OX=9606 GN=NDST1 PE=1 SV=1	0	6	4	4	882	-0.235114	0.0457104	105.6	94.4
Q5JTH9	RRP12-like protein OS=Homo sapiens OX=9606 GN=RRP12 PE=1 SV=2	0	37	33	33	1297	-0.233888	0.0438867	107	93
P10909-2	Isoform 2 of Clusterin OS=Homo sapiens OX=9606 GN=CLU	0	21	7	7	501	-0.233888	0.052337	107.7	92.3
Q14112	Nidogen-2 OS=Homo sapiens OX=9606 GN=NID2 PE=1 SV=3	0	11	11	10	1375	-0.233888	0.0383955	107.1	92.9
A0A1B0GUD6	Protein Aster-B OS=Homo sapiens OX=9606 GN=GRAMD1B PE=1 SV=1	0	7	5	4	877	-0.232661	0.0347121	110.1	89.9
Q8IUC8	Polypeptide N-acetylgalactosaminyltransferase 13 OS=Homo sapiens OX=9606 GN=GALNT13 PE=2 SV=2	0	16	9	5	556	-0.231432	0.0472743	106.8	93.2
Q9H0V9-2	Isoform 2 of VIP36-like protein OS=Homo sapiens OX=9606 GN=LMAN2L	0	37	11	11	359	-0.230203	0.0410038	103.7	96.3
Q8NBJ4	Golgi membrane protein 1 OS=Homo sapiens OX=9606 GN=GOLM1 PE=1 SV=1	0	31	10	10	401	-0.227741	0.0389748	108.2	91.8
Q6L9W6	Beta-1,4-N-acetylgalactosaminyltransferase 3 OS=Homo sapiens OX=9606 GN=B4GALNT3 PE=1 SV=2	0	8	6	6	998	-0.227741	0.0382669	100.9	99.1
Q9UHI8	A disintegrin and metalloproteinase with thrombospondin motifs 1 OS=Homo sapiens OX=9606 GN=ADAMTS1 PE=1 SV=4	0	25	13	13	967	-0.226509	0.0486671	110.9	89.1
Q9NUM4	Transmembrane protein 106B OS=Homo sapiens OX=9606 GN=TMEM106B PE=1 SV=2	0	11	2	2	274	-0.222805	0.0331959	106.9	93.1
Q8TAA9	Vang-like protein 1 OS=Homo sapiens OX=9606 GN=VANGL1 PE=1 SV=1	0	36	14	14	524	-0.221568	0.0347121	104.1	95.9
A0A2R8YEC9	Beta-mannosidase OS=Homo sapiens OX=9606 GN=MANBA PE=1 SV=1	0	16	12	12	925	-0.22033	0.0463451	110.3	89.7
O43529	Carbohydrate sulfotransferase 10 OS=Homo sapiens OX=9606 GN=CHST10 PE=1 SV=1	0	10	3	3	356	-0.22033	0.0383955	108.3	91.7
Q7L311	Armadillo repeat-containing X-linked protein 2 OS=Homo sapiens OX=9606 GN=ARMCX2 PE=2 SV=1	0	5	2	2	632	-0.219091	0.0273183	107.6	92.4
Q14571	Inositol 1,4,5-trisphosphate receptor type 2 OS=Homo sapiens OX=9606 GN=ITPR2 PE=1 SV=2	0	31	62	53	2701	-0.217851	0.0331959	102.9	97.1
Q5VUD6	Divergent protein kinase domain 1B OS=Homo sapiens OX=9606 GN=DIPK1B PE=1 SV=3	0	11	4	3	431	-0.217851	0.0347121	105.7	94.3
Q9BX67	Junctional adhesion molecule C OS=Homo sapiens OX=9606 GN=JAM3 PE=1 SV=1	0.004	5	1	1	310	-0.212881	0.0273183	115.4	84.6
Q99519	Sialidase-1 OS=Homo sapiens OX=9606 GN=NEU1 PE=1 SV=1	0	7	3	3	415	-0.211635	0.0321813	106.9	93.1
P52849	Bifunctional heparan sulfate N-deacetylase/N-sulfotransferase 2 OS=Homo sapiens OX=9606 GN=NDST2 PE=1 SV=1	0	12	9	9	883	-0.210389	0.0302496	106.4	93.6
P18065	Insulin-like growth factor-binding protein 2 OS=Homo sapiens OX=9606 GN=IGFBP2 PE=1 SV=2	0	25	6	6	325	-0.209141	0.0324259	110.1	89.9
Q14573	Inositol 1,4,5-trisphosphate receptor type 3 OS=Homo sapiens OX=9606 GN=ITPR3 PE=1 SV=2	0	37	67	61	2671	-0.207893	0.0321813	107.9	92.1
O15460	Prolyl 4-hydroxylase subunit alpha-2 OS=Homo sapiens OX=9606 GN=P4HA2 PE=1 SV=1	0	28	12	12	535	-0.207893	0.0411183	105.1	94.9
Q9UM22	Mammalian ependymin-related protein 1 OS=Homo sapiens OX=9606 GN=EPDR1 PE=1 SV=2	0	18	3	3	224	-0.207893	0.0321813	115.2	84.8
F5H1S1	Mannosyltransferase OS=Homo sapiens OX=9606 GN=PIGB PE=1 SV=2	0	18	7	7	555	-0.206643	0.0321813	108	92
P08581-2	Isoform 2 of Hepatocyte growth factor receptor OS=Homo sapiens OX=9606 GN=MET	0	13	14	14	1408	-0.205393	0.0321813	104.1	95.9
P08236	Beta-glucuronidase OS=Homo sapiens OX=9606 GN=GUSB PE=1 SV=2	0	27	14	14	651	-0.204141	0.0321813	107.4	92.6
Q9P2K2	Thioredoxin domain-containing protein 16 OS=Homo sapiens OX=9606 GN=TXNDC16 PE=1 SV=4	0	22	15	15	825	-0.204141	0.0321813	106	94
Q14554	Protein disulfide-isomerase A5 OS=Homo sapiens OX=9606 GN=PDIA5 PE=1 SV=1	0	19	8	8	519	-0.204141	0.0321813	113.5	86.5
X6R4W8	BUB3-interacting and GLEBS motif-containing protein ZNF207 OS=Homo sapiens OX=9606 GN=ZNF207 PE=1 SV=1	0	13	5	5	497	-0.204141	0.0321813	64.4	135.6
P02751-1	Isoform 1 of Fibronectin OS=Homo sapiens OX=9606 GN=FN1	0	10	15	15	2386	-0.204141	0.0338608	104.8	95.2
O60613	Selenoprotein F OS=Homo sapiens OX=9606 GN=SELENOF PE=1 SV=4	0	23	3	3	165	-0.202888	0.0317297	108	92
A0A0B4J1V8	HCG2039996 OS=Homo sapiens OX=9606 GN=PPAN-P2RY11 PE=3 SV=1	0	15	8	8	794	-0.202888	0.0323539	107.4	92.6
Q10469	Alpha-1,6-mannosyl-glycoprotein 2-beta-N-acetylglucosaminyltransferase OS=Homo sapiens OX=9606 GN=MGAT2 PE=1 SV=1	0	13	5	5	447	-0.202888	0.0321813	105.1	94.9
O75072	Fukutin OS=Homo sapiens OX=9606 GN=FKTN PE=1 SV=2	0	7	3	3	461	-0.202888	0.0321813	109.1	90.9
Q5BKT4	Dol-P-Glc:Glc(2)Man(9)GlcNAc(2)-PP-Dol alpha-1,2-glucosyltransferase OS=Homo sapiens OX=9606 GN=ALG10 PE=2 SV=1	0	5	2	2	473	-0.202888	0.027673	109	91
O15031	Plexin-B2 OS=Homo sapiens OX=9606 GN=PLXNB2 PE=1 SV=3	0	23	30	30	1838	-0.201634	0.0302496	107.5	92.5
Q13308-6	Isoform 6 of Inactive tyrosine-protein kinase 7 OS=Homo sapiens OX=9606 GN=PTK7	0	21	16	16	1078	-0.201634	0.0321813	105	95
P55899	IgG receptor FcRn large subunit p51 OS=Homo sapiens OX=9606 GN=FCGRT PE=1 SV=1	0	8	2	2	365	-0.201634	0.0273183	104.6	95.4
Q9BT22	Chitobiosyldiphosphodolichol beta-mannosyltransferase OS=Homo sapiens OX=9606 GN=ALG1 PE=1 SV=2	0	8	2	2	464	-0.201634	0.0273183	111.5	88.5
P20933	N(4)-(beta-N-acetylglucosaminyl)-L-asparaginase OS=Homo sapiens OX=9606 GN=AGA PE=1 SV=2	0	10	2	2	346	-0.200379	0.0273183	106.9	93.1
Q9H9S5	Fukutin-related protein OS=Homo sapiens OX=9606 GN=FKRP PE=1 SV=1	0	8	4	4	495	-0.200379	0.0301574	108.9	91.1
P05556	Integrin beta-1 OS=Homo sapiens OX=9606 GN=ITGB1 PE=1 SV=2	0	25	14	14	798	-0.199123	0.0296628	106.8	93.2
P05023	Sodium/potassium-transporting ATPase subunit alpha-1 OS=Homo sapiens OX=9606 GN=ATP1A1 PE=1 SV=1	0	21	15	15	1023	-0.199123	0.0323539	106.6	93.4
Q10472	Polypeptide N-acetylgalactosaminyltransferase 1 OS=Homo sapiens OX=9606 GN=GALNT1 PE=1 SV=1	0	16	8	4	559	-0.199123	0.0292754	101.1	98.9
Q9Y5Z0	Beta-secretase 2 OS=Homo sapiens OX=9606 GN=BACE2 PE=1 SV=1	0	7	3	3	518	-0.197865	0.0292754	104.1	95.9
O94876	Transmembrane and coiled-coil domains protein 1 OS=Homo sapiens OX=9606 GN=TMCC1 PE=1 SV=3	0	17	6	5	653	-0.196607	0.027673	95.1	104.9
Q5VV42	Threonylcarbamoyladenosine tRNA methylthiotransferase OS=Homo sapiens OX=9606 GN=CDKAL1 PE=1 SV=1	0	16	7	7	579	-0.195348	0.0321813	107.1	92.9
Q5QPI9	Ectonucleoside triphosphate diphosphohydrolase 6 OS=Homo sapiens OX=9606 GN=ENTPD6 PE=1 SV=2	0	27	7	4	437	-0.192825	0.0321813	108.3	91.7
Q06481	Amyloid-like protein 2 OS=Homo sapiens OX=9606 GN=APLP2 PE=1 SV=2	0	22	11	2	763	-0.192825	0.0321813	101.3	98.7
A0A0J9YXF2	Paraoxonase 2, isoform CRA_a OS=Homo sapiens OX=9606 GN=PON2 PE=1 SV=1	0	13	2	2	375	-0.192825	0.0273183	111.5	88.5
Q9NUQ2	1-acyl-sn-glycerol-3-phosphate acyltransferase epsilon OS=Homo sapiens OX=9606 GN=AGPAT5 PE=1 SV=3	0	18	5	5	364	-0.191563	0.0321813	107.2	92.8
Q99538	Legumain OS=Homo sapiens OX=9606 GN=LGMN PE=1 SV=1	0	17	4	4	433	-0.191563	0.0318684	108.1	91.9
Q9P273	Teneurin-3 OS=Homo sapiens OX=9606 GN=TENM3 PE=2 SV=3	0	11	21	21	2699	-0.191563	0.0307229	110	90
Q9NQC3	Reticulon-4 OS=Homo sapiens OX=9606 GN=RTN4 PE=1 SV=2	0	6	4	4	1192	-0.191563	0.0321813	109.2	90.8
Q15836	Vesicle-associated membrane protein 3 OS=Homo sapiens OX=9606 GN=VAMP3 PE=1 SV=3	0	33	2	2	100	-0.189034	0.0273183	106.8	93.2
Q9UHF1	Epidermal growth factor-like protein 7 OS=Homo sapiens OX=9606 GN=EGFL7 PE=1 SV=3	0	24	4	4	273	-0.189034	0.0273183	104.9	95.1
A0A3B3ITU8	Inositol 1,4,5-trisphosphate receptor type 1 OS=Homo sapiens OX=9606 GN=ITPR1 PE=1 SV=1	0	22	46	37	2744	-0.189034	0.027673	105.6	94.4
Q9UIQ6	Leucyl-cystinyl aminopeptidase OS=Homo sapiens OX=9606 GN=LNPEP PE=1 SV=3	0	20	17	17	1025	-0.189034	0.0292754	104.7	95.3
Q969X5	Endoplasmic reticulum-Golgi intermediate compartment protein 1 OS=Homo sapiens OX=9606 GN=ERGIC1 PE=1 SV=1	0	17	5	5	290	-0.189034	0.0277561	103.4	96.6
Q9ULG6-5	Isoform 5 of Cell cycle progression protein 1 OS=Homo sapiens OX=9606 GN=CCPG1	0	14	9	1	807	-0.189034	0.027673	104	96
Q8IWU5	Extracellular sulfatase Sulf-2 OS=Homo sapiens OX=9606 GN=SULF2 PE=1 SV=1	0	12	6	6	870	-0.189034	0.0297082	106.6	93.4
P11047	Laminin subunit gamma-1 OS=Homo sapiens OX=9606 GN=LAMC1 PE=1 SV=3	0	37	43	43	1609	-0.187768	0.027673	104.9	95.1
Q9NZ43	Vesicle transport protein USE1 OS=Homo sapiens OX=9606 GN=USE1 PE=1 SV=2	0	10	2	2	259	-0.186501	0.0273183	109.3	90.7
Q15084-2	Isoform 2 of Protein disulfide-isomerase A6 OS=Homo sapiens OX=9606 GN=PDIA6	0	29	12	12	492	-0.183963	0.0273183	105.3	94.7
O95490-6	Isoform 6 of Adhesion G protein-coupled receptor L2 OS=Homo sapiens OX=9606 GN=ADGRL2	0	17	17	17	1474	-0.183963	0.027673	104.6	95.4
E7EX59	Propionyl-CoA carboxylase beta chain, mitochondrial OS=Homo sapiens OX=9606 GN=PCCB PE=1 SV=1	0	51	21	21	570	-0.182692	0.0273183	100.6	99.4
Q9NYQ6	Cadherin EGF LAG seven-pass G-type receptor 1 OS=Homo sapiens OX=9606 GN=CELSR1 PE=1 SV=1	0	5	10	9	3014	-0.182692	0.027745	107.3	92.7
Q53EP0	Fibronectin type III domain-containing protein 3B OS=Homo sapiens OX=9606 GN=FNDC3B PE=1 SV=2	0	15	13	13	1204	-0.181421	0.0290889	102.7	97.3
Q13443	Disintegrin and metalloproteinase domain-containing protein 9 OS=Homo sapiens OX=9606 GN=ADAM9 PE=1 SV=1	0	10	7	7	819	-0.181421	0.0279032	103.3	96.7
H0Y6T6	Nurim (Fragment) OS=Homo sapiens OX=9606 GN=NRM PE=1 SV=1	0	6	2	2	262	-0.181421	0.0292754	106.8	93.2
Q9GZX9	Twisted gastrulation protein homolog 1 OS=Homo sapiens OX=9606 GN=TWSG1 PE=1 SV=1	0	7	1	1	223	-0.180148	0.0273183	106.2	93.8
O75078	Disintegrin and metalloproteinase domain-containing protein 11 OS=Homo sapiens OX=9606 GN=ADAM11 PE=2 SV=3	0	5	2	2	769	-0.180148	0.0273183	98.6	101.4
P54802	Alpha-N-acetylglucosaminidase OS=Homo sapiens OX=9606 GN=NAGLU PE=1 SV=2	0	38	19	18	743	-0.178874	0.0273183	105.6	94.4
P49641	Alpha-mannosidase 2x OS=Homo sapiens OX=9606 GN=MAN2A2 PE=2 SV=3	0	11	11	10	1150	-0.177599	0.027745	106.5	93.5
Q15011	Homocysteine-responsive endoplasmic reticulum-resident ubiquitin-like domain member 1 protein OS=Homo sapiens OX=9606 GN=HERPUD1 PE=1 SV=1	0	6	2	2	391	-0.177599	0.0273183	105.9	94.1
Q99523	Sortilin OS=Homo sapiens OX=9606 GN=SORT1 PE=1 SV=3	0	9	5	5	831	-0.176323	0.0273183	107.9	92.1
O94923	D-glucuronyl C5-epimerase OS=Homo sapiens OX=9606 GN=GLCE PE=1 SV=3	0	16	7	7	617	-0.175045	0.027673	105	95
P19021-5	Isoform 5 of Peptidyl-glycine alpha-amidating monooxygenase OS=Homo sapiens OX=9606 GN=PAM	0	12	8	8	974	-0.175045	0.0273183	108.5	91.5
Q96HV5	Transmembrane protein 41A OS=Homo sapiens OX=9606 GN=TMEM41A PE=1 SV=1	0.006	5	1	1	264	-0.175045	0.0273183	103	97
Q8NBI6	Xyloside xylosyltransferase 1 OS=Homo sapiens OX=9606 GN=XXYLT1 PE=1 SV=1	0	16	5	5	393	-0.171207	0.0273183	103.8	96.2
Q9H173	Nucleotide exchange factor SIL1 OS=Homo sapiens OX=9606 GN=SIL1 PE=1 SV=1	0	32	11	11	461	-0.169925	0.0273183	103.8	96.2
Q9UJ14	Glutathione hydrolase 7 OS=Homo sapiens OX=9606 GN=GGT7 PE=1 SV=2	0	10	5	5	662	-0.168642	0.0273183	106.2	93.8
Q96LT4	Sphingomyelin synthase-related protein 1 OS=Homo sapiens OX=9606 GN=SAMD8 PE=1 SV=2	0	7	2	2	415	-0.168642	0.0273183	105.6	94.4
Q96DZ1	Endoplasmic reticulum lectin 1 OS=Homo sapiens OX=9606 GN=ERLEC1 PE=1 SV=1	0	35	14	14	483	-0.167358	0.0273183	105.3	94.7
Q5T7M9	Divergent protein kinase domain 1A OS=Homo sapiens OX=9606 GN=DIPK1A PE=2 SV=1	0	11	4	3	428	-0.167358	0.0273183	105.6	94.4
P49755	Transmembrane emp24 domain-containing protein 10 OS=Homo sapiens OX=9606 GN=TMED10 PE=1 SV=2	0	32	6	6	219	-0.166073	0.0273183	85.5	114.5
Q6ZPD9	Probable C-mannosyltransferase DPY19L3 OS=Homo sapiens OX=9606 GN=DPY19L3 PE=2 SV=1	0	10	5	5	716	-0.166073	0.0273183	110.6	89.4
J3KQ48	Peptidyl-tRNA hydrolase 2, mitochondrial OS=Homo sapiens OX=9606 GN=PTRH2 PE=1 SV=1	0	23	2	2	180	-0.164786	0.0273183	106.5	93.5
Q5VSG8	Glycoprotein endo-alpha-1,2-mannosidase-like protein OS=Homo sapiens OX=9606 GN=MANEAL PE=2 SV=1	0	18	4	4	457	-0.164786	0.0273183	106.3	93.7
Q14435	Polypeptide N-acetylgalactosaminyltransferase 3 OS=Homo sapiens OX=9606 GN=GALNT3 PE=1 SV=2	0	15	7	7	633	-0.164786	0.0273183	104.8	95.2
P12109	Collagen alpha-1(VI) chain OS=Homo sapiens OX=9606 GN=COL6A1 PE=1 SV=3	0	10	7	7	1028	-0.164786	0.0273183	105.7	94.3
P25311	Zinc-alpha-2-glycoprotein OS=Homo sapiens OX=9606 GN=AZGP1 PE=1 SV=2	0	12	2	2	298	-0.163499	0.0261843	100.3	99.7
Q9UIW2	Plexin-A1 OS=Homo sapiens OX=9606 GN=PLXNA1 PE=1 SV=3	0	10	15	9	1896	-0.163499	0.0273183	105	95
Q9Y625	Glypican-6 OS=Homo sapiens OX=9606 GN=GPC6 PE=1 SV=1	0	5	2	1	555	-0.163499	0.0250984	104.5	95.5
P16615	Sarcoplasmic/endoplasmic reticulum calcium ATPase 2 OS=Homo sapiens OX=9606 GN=ATP2A2 PE=1 SV=1	0	36	26	26	1042	-0.16221	0.0273183	104.9	95.1
Q07075	Glutamyl aminopeptidase OS=Homo sapiens OX=9606 GN=ENPEP PE=1 SV=3	0	8	6	6	957	-0.16221	0.0273183	104.7	95.3
Q8NCH0	Carbohydrate sulfotransferase 14 OS=Homo sapiens OX=9606 GN=CHST14 PE=1 SV=2	0	27	8	8	376	-0.16092	0.0273183	103.5	96.5
Q9BZQ6	ER degradation-enhancing alpha-mannosidase-like protein 3 OS=Homo sapiens OX=9606 GN=EDEM3 PE=1 SV=2	0	30	19	19	932	-0.159629	0.0273183	100.9	99.1
Q02413	Desmoglein-1 OS=Homo sapiens OX=9606 GN=DSG1 PE=1 SV=2	0	10	7	7	1049	-0.159629	0.0273183	107.2	92.8
Q16706	Alpha-mannosidase 2 OS=Homo sapiens OX=9606 GN=MAN2A1 PE=1 SV=2	0	23	20	19	1144	-0.158337	0.0273183	105.5	94.5
Q93063-3	Isoform 3 of Exostosin-2 OS=Homo sapiens OX=9606 GN=EXT2	0	34	19	19	751	-0.155749	0.0273183	103	97
P01911	HLA class II histocompatibility antigen, DRB1-15 beta chain OS=Homo sapiens OX=9606 GN=HLA-DRB1 PE=1 SV=2	0	12	2	2	266	-0.154454	0.0273183	104.7	95.3
Q8NAT1	Protein O-linked-mannose beta-1,4-N-acetylglucosaminyltransferase 2 OS=Homo sapiens OX=9606 GN=POMGNT2 PE=1 SV=1	0	9	4	4	580	-0.154454	0.0273183	110.3	89.7
P98155	Very low-density lipoprotein receptor OS=Homo sapiens OX=9606 GN=VLDLR PE=1 SV=1	0	10	6	6	873	-0.153157	0.0273183	101	99
O00115	Deoxyribonuclease-2-alpha OS=Homo sapiens OX=9606 GN=DNASE2 PE=1 SV=2	0	6	2	2	360	-0.153157	0.0273183	104.9	95.1
Q7Z2K6	Endoplasmic reticulum metallopeptidase 1 OS=Homo sapiens OX=9606 GN=ERMP1 PE=1 SV=2	0	5	4	4	904	-0.153157	0.0273183	104.4	95.6
Q9NYU2	UDP-glucose:glycoprotein glucosyltransferase 1 OS=Homo sapiens OX=9606 GN=UGGT1 PE=1 SV=3	0	51	55	51	1555	-0.151859	0.0273183	103.2	96.8
O14656	Torsin-1A OS=Homo sapiens OX=9606 GN=TOR1A PE=1 SV=1	0	30	9	8	332	-0.151859	0.0273183	105	95
P14543	Nidogen-1 OS=Homo sapiens OX=9606 GN=NID1 PE=1 SV=3	0	17	15	14	1247	-0.151859	0.0273183	97.3	102.7
Q8NE01	Metal transporter CNNM3 OS=Homo sapiens OX=9606 GN=CNNM3 PE=1 SV=1	0	15	8	8	707	-0.151859	0.0273183	103.5	96.5
P30040	Endoplasmic reticulum resident protein 29 OS=Homo sapiens OX=9606 GN=ERP29 PE=1 SV=4	0	33	6	6	261	-0.149259	0.0273183	104.1	95.9
Q9H8M5	Metal transporter CNNM2 OS=Homo sapiens OX=9606 GN=CNNM2 PE=1 SV=2	0	5	3	2	875	-0.149259	0.0229215	96.8	103.2
Q6ZNB6	NF-X1-type zinc finger protein NFXL1 OS=Homo sapiens OX=9606 GN=NFXL1 PE=1 SV=2	0	28	16	16	911	-0.147958	0.0273183	105.3	94.7
Q9P244	Leucine-rich repeat and fibronectin type III domain-containing protein 1 OS=Homo sapiens OX=9606 GN=LRFN1 PE=1 SV=2	0	16	8	8	771	-0.147958	0.0273183	105.1	94.9
Q3ZAQ7	Vacuolar ATPase assembly integral membrane protein VMA21 OS=Homo sapiens OX=9606 GN=VMA21 PE=1 SV=1	0	25	2	2	101	-0.145351	0.0240261	177.1	22.9
O00754	Lysosomal alpha-mannosidase OS=Homo sapiens OX=9606 GN=MAN2B1 PE=1 SV=3	0	21	16	16	1011	-0.145351	0.0273183	105.4	94.6
P05067	Amyloid-beta precursor protein OS=Homo sapiens OX=9606 GN=APP PE=1 SV=3	0	21	12	12	770	-0.144046	0.0273183	104.8	95.2
G0XQ39	STIM1L OS=Homo sapiens OX=9606 GN=STIM1 PE=1 SV=1	0	14	8	8	791	-0.144046	0.0273183	104.9	95.1
P19022	Cadherin-2 OS=Homo sapiens OX=9606 GN=CDH2 PE=1 SV=4	0	23	14	14	906	-0.14274	0.0273183	100.5	99.5
P51805	Plexin-A3 OS=Homo sapiens OX=9606 GN=PLXNA3 PE=1 SV=2	0	15	20	15	1871	-0.14274	0.0273183	104.3	95.7
Q13510-2	Isoform 2 of Acid ceramidase OS=Homo sapiens OX=9606 GN=ASAH1	0	14	5	2	411	-0.14274	0.0273183	105	95
Q3ZCQ8-2	Isoform 2 of Mitochondrial import inner membrane translocase subunit TIM50 OS=Homo sapiens OX=9606 GN=TIMM50	0	18	6	6	456	-0.141433	0.0273183	104.4	95.6
Q9Y4L1	Hypoxia up-regulated protein 1 OS=Homo sapiens OX=9606 GN=HYOU1 PE=1 SV=1	0	46	32	32	999	-0.140124	0.0273183	102.1	97.9
Q96MM7-4	Isoform 4 of Heparan-sulfate 6-O-sulfotransferase 2 OS=Homo sapiens OX=9606 GN=HS6ST2	0	8	5	5	645	-0.140124	0.0261843	102.1	97.9
Q96L58	Beta-1,3-galactosyltransferase 6 OS=Homo sapiens OX=9606 GN=B3GALT6 PE=1 SV=2	0	24	6	6	329	-0.138814	0.0273183	111.2	88.8
P02754	Beta-lactoglobulin OS=Bos taurus GN=LGB PE=1 SV=3	0	19	3	3	178	-0.138814	0.0273183	99.9	100.1
Q8IZ52	Chondroitin sulfate synthase 2 OS=Homo sapiens OX=9606 GN=CHPF PE=1 SV=2	0	14	9	9	775	-0.138814	0.0273183	101.6	98.4
P39060	Collagen alpha-1(XVIII) chain OS=Homo sapiens OX=9606 GN=COL18A1 PE=1 SV=5	0	13	14	14	1754	-0.138814	0.0273183	105.7	94.3
P11717	Cation-independent mannose-6-phosphate receptor OS=Homo sapiens OX=9606 GN=IGF2R PE=1 SV=3	0	24	43	43	2491	-0.137504	0.0264593	102.3	97.7
Q96D53	Atypical kinase COQ8B, mitochondrial OS=Homo sapiens OX=9606 GN=COQ8B PE=1 SV=2	0	13	4	4	544	-0.137504	0.0273183	103.7	96.3
P29322-2	Isoform 2 of Ephrin type-A receptor 8 OS=Homo sapiens OX=9606 GN=EPHA8	0	10	3	3	495	-0.137504	0.0267414	103.6	96.4
Q86W74	Ankyrin repeat domain-containing protein 46 OS=Homo sapiens OX=9606 GN=ANKRD46 PE=1 SV=1	0.004	5	1	1	232	-0.137504	0.0250984	104.5	95.5
O00264	Membrane-associated progesterone receptor component 1 OS=Homo sapiens OX=9606 GN=PGRMC1 PE=1 SV=3	0	52	6	5	195	-0.136191	0.0261843	103.6	96.4
Q6P179	Endoplasmic reticulum aminopeptidase 2 OS=Homo sapiens OX=9606 GN=ERAP2 PE=1 SV=2	0	19	17	17	960	-0.136191	0.0273183	105	95
Q9BTY2	Plasma alpha-L-fucosidase OS=Homo sapiens OX=9606 GN=FUCA2 PE=1 SV=2	0	24	10	10	467	-0.134878	0.0273183	105	95
P30101	Protein disulfide-isomerase A3 OS=Homo sapiens OX=9606 GN=PDIA3 PE=1 SV=4	0	38	14	12	505	-0.133564	0.0261843	99.6	100.4
O95881	Thioredoxin domain-containing protein 12 OS=Homo sapiens OX=9606 GN=TXNDC12 PE=1 SV=1	0	22	3	3	172	-0.133564	0.0273183	104.5	95.5
Q9Y6I9	Testis-expressed protein 264 OS=Homo sapiens OX=9606 GN=TEX264 PE=1 SV=1	0	11	3	3	313	-0.133564	0.0226897	102.1	97.9
Q8NBS9	Thioredoxin domain-containing protein 5 OS=Homo sapiens OX=9606 GN=TXNDC5 PE=1 SV=2	0	45	16	16	432	-0.132248	0.0261843	108.5	91.5
Q8IVL6	Prolyl 3-hydroxylase 3 OS=Homo sapiens OX=9606 GN=P3H3 PE=1 SV=1	0	32	14	14	736	-0.132248	0.0267414	102.9	97.1
Q32P28-3	Isoform 3 of Prolyl 3-hydroxylase 1 OS=Homo sapiens OX=9606 GN=P3H1	0	22	12	12	804	-0.132248	0.0273183	105.2	94.8
Q9NRC1	Suppressor of tumorigenicity 7 protein OS=Homo sapiens OX=9606 GN=ST7 PE=1 SV=1	0	8	4	4	585	-0.132248	0.0261843	105.3	94.7
Q96FL9-3	Isoform 3 of Polypeptide N-acetylgalactosaminyltransferase 14 OS=Homo sapiens OX=9606 GN=GALNT14	0	20	9	1	557	-0.130931	0.0258655	105.4	94.6
Q05707-2	Isoform 2 of Collagen alpha-1(XIV) chain OS=Homo sapiens OX=9606 GN=COL14A1	0	27	33	33	1780	-0.129613	0.0251028	104.7	95.3
P01034	Cystatin-C OS=Homo sapiens OX=9606 GN=CST3 PE=1 SV=1	0.003	8	1	1	146	-0.129613	0.0250984	105.8	94.2
Q9Y5M8	Signal recognition particle receptor subunit beta OS=Homo sapiens OX=9606 GN=SRPRB PE=1 SV=3	0	53	11	11	271	-0.125651	0.0250984	102.3	97.7
Q969V3	Nicalin OS=Homo sapiens OX=9606 GN=NCLN PE=1 SV=2	0	44	19	19	563	-0.125651	0.0250984	103.4	96.6
Q9BS26	Endoplasmic reticulum resident protein 44 OS=Homo sapiens OX=9606 GN=ERP44 PE=1 SV=1	0	41	12	12	406	-0.125651	0.0250984	104.8	95.2
Q8N129	Protein canopy homolog 4 OS=Homo sapiens OX=9606 GN=CNPY4 PE=2 SV=1	0	36	7	7	248	-0.125651	0.0273183	101.8	98.2
Q9NYU1	UDP-glucose:glycoprotein glucosyltransferase 2 OS=Homo sapiens OX=9606 GN=UGGT2 PE=1 SV=4	0	42	53	49	1516	-0.124328	0.0250984	104.3	95.7
Q08431	Lactadherin OS=Homo sapiens OX=9606 GN=MFGE8 PE=1 SV=3	0	14	4	4	387	-0.124328	0.0239619	100.6	99.4
Q16585	Beta-sarcoglycan OS=Homo sapiens OX=9606 GN=SGCB PE=1 SV=1	0	8	2	2	318	-0.124328	0.0261843	104.3	95.7
Q4G148	Glucoside xylosyltransferase 1 OS=Homo sapiens OX=9606 GN=GXYLT1 PE=1 SV=2	0	5	2	2	440	-0.124328	0.0241145	102.3	97.7
G8JLG2	CDSN OS=Homo sapiens OX=9606 GN=CDSN PE=1 SV=1	0	5	2	2	529	-0.124328	0.0250984	103.3	96.7
Q9HBM0	Vezatin OS=Homo sapiens OX=9606 GN=VEZT PE=1 SV=3	0	5	3	3	779	-0.124328	0.0250984	103.5	96.5
Q6IEE7	Transmembrane protein 132E OS=Homo sapiens OX=9606 GN=TMEM132E PE=1 SV=2	0	9	7	7	1074	-0.123004	0.0250984	103.7	96.3
P53634	Dipeptidyl peptidase 1 OS=Homo sapiens OX=9606 GN=CTSC PE=1 SV=2	0	7	3	3	463	-0.123004	0.0258655	85	115
P06280	Alpha-galactosidase A OS=Homo sapiens OX=9606 GN=GLA PE=1 SV=1	0	33	11	11	429	-0.121679	0.0243536	105.9	94.1
P27824-2	Isoform 2 of Calnexin OS=Homo sapiens OX=9606 GN=CANX	0	31	18	14	627	-0.121679	0.0241615	102.3	97.7
O14525	Astrotactin-1 OS=Homo sapiens OX=9606 GN=ASTN1 PE=2 SV=3	0	13	10	10	1302	-0.121679	0.0250984	113.9	86.1
Q8NHP8	Putative phospholipase B-like 2 OS=Homo sapiens OX=9606 GN=PLBD2 PE=1 SV=2	0	10	5	5	589	-0.121679	0.0241615	107.8	92.2
Q08380	Galectin-3-binding protein OS=Homo sapiens OX=9606 GN=LGALS3BP PE=1 SV=1	0	42	17	17	585	-0.120352	0.0241145	103.6	96.4
P42785-2	Isoform 2 of Lysosomal Pro-X carboxypeptidase OS=Homo sapiens OX=9606 GN=PRCP	0	14	4	4	517	-0.120352	0.0261843	103.2	96.8
Q96EU7	C1GALT1-specific chaperone 1 OS=Homo sapiens OX=9606 GN=C1GALT1C1 PE=1 SV=1	0	19	5	5	318	-0.119024	0.0267414	113.7	86.3
Q92692	Nectin-2 OS=Homo sapiens OX=9606 GN=NECTIN2 PE=1 SV=1	0	19	8	8	538	-0.119024	0.0273183	104	96
Q2MV58	Tectonic-1 OS=Homo sapiens OX=9606 GN=TCTN1 PE=2 SV=2	0	17	6	6	587	-0.119024	0.0250984	89.9	110.1
P22413	Ectonucleotide pyrophosphatase/phosphodiesterase family member 1 OS=Homo sapiens OX=9606 GN=ENPP1 PE=1 SV=2	0	28	15	15	925	-0.117695	0.0261949	103.9	96.1
P08069	Insulin-like growth factor 1 receptor OS=Homo sapiens OX=9606 GN=IGF1R PE=1 SV=1	0	23	22	19	1367	-0.117695	0.0258655	100.4	99.6
A2RU67	Protein FAM234B OS=Homo sapiens OX=9606 GN=FAM234B PE=1 SV=1	0	9	4	4	622	-0.117695	0.0244984	106.2	93.8
Q9UBV2	Protein sel-1 homolog 1 OS=Homo sapiens OX=9606 GN=SEL1L PE=1 SV=3	0	46	20	20	794	-0.116365	0.0229215	104.9	95.1
Q9Y3A6	Transmembrane emp24 domain-containing protein 5 OS=Homo sapiens OX=9606 GN=TMED5 PE=1 SV=1	0	27	4	4	229	-0.116365	0.0273183	103.6	96.4
Q9UKZ9	Procollagen C-endopeptidase enhancer 2 OS=Homo sapiens OX=9606 GN=PCOLCE2 PE=1 SV=1	0	8	3	3	415	-0.116365	0.0212744	106.9	93.1
O75473	Leucine-rich repeat-containing G-protein coupled receptor 5 OS=Homo sapiens OX=9606 GN=LGR5 PE=1 SV=1	0	5	4	3	907	-0.116365	0.0226897	101.9	98.1
Q6IAN0	Dehydrogenase/reductase SDR family member 7B OS=Homo sapiens OX=9606 GN=DHRS7B PE=1 SV=2	0	18	6	6	325	-0.115033	0.0265607	99.2	100.8
Q13162	Peroxiredoxin-4 OS=Homo sapiens OX=9606 GN=PRDX4 PE=1 SV=1	0	59	12	10	271	-0.1137	0.0226897	106.4	93.6
Q9BT09	Protein canopy homolog 3 OS=Homo sapiens OX=9606 GN=CNPY3 PE=1 SV=1	0	26	5	5	278	-0.1137	0.0229215	103.4	96.6
Q9NQX7	Integral membrane protein 2C OS=Homo sapiens OX=9606 GN=ITM2C PE=1 SV=1	0	23	4	4	267	-0.112367	0.0226897	103.4	96.6
Q7Z6J6	FERM domain-containing protein 5 OS=Homo sapiens OX=9606 GN=FRMD5 PE=1 SV=1	0	7	3	3	570	-0.112367	0.0202679	134.7	65.3
Q9P246-2	Isoform 2 of Stromal interaction molecule 2 OS=Homo sapiens OX=9606 GN=STIM2	0	5	3	3	841	-0.112367	0.0241145	129.5	70.5
P13747	HLA class I histocompatibility antigen, alpha chain E OS=Homo sapiens OX=9606 GN=HLA-E PE=1 SV=4	0	30	8	6	358	-0.111031	0.0250984	103.6	96.4
Q9NZ08-2	Isoform 2 of Endoplasmic reticulum aminopeptidase 1 OS=Homo sapiens OX=9606 GN=ERAP1	0	25	19	19	948	-0.111031	0.0273183	99.5	100.5
P07858	Cathepsin B OS=Homo sapiens OX=9606 GN=CTSB PE=1 SV=3	0	14	3	3	339	-0.109695	0.0202679	106.1	93.9
Q9UMX5	Neudesin OS=Homo sapiens OX=9606 GN=NENF PE=1 SV=1	0	52	6	6	172	-0.108357	0.0268663	103.5	96.5
Q86XX4-2	Isoform 2 of Extracellular matrix protein FRAS1 OS=Homo sapiens OX=9606 GN=FRAS1	0	9	24	23	4012	-0.108357	0.0250984	105.2	94.8
Q86Y07	Serine/threonine-protein kinase VRK2 OS=Homo sapiens OX=9606 GN=VRK2 PE=1 SV=3	0	8	3	3	508	-0.108357	0.0238566	103.2	96.8
Q9H5K3	Protein O-mannose kinase OS=Homo sapiens OX=9606 GN=POMK PE=1 SV=1	0	23	5	5	350	-0.107018	0.0241615	102.6	97.4
F8WAR4	MICOS complex subunit OS=Homo sapiens OX=9606 GN=CHCHD3 PE=1 SV=1	0	11	2	2	241	-0.107018	0.0250984	103	97
A0A0S2Z4L3	Protein S isoform 2 (Fragment) OS=Homo sapiens OX=9606 GN=PROS1 PE=1 SV=1	0	9	5	5	708	-0.107018	0.0226897	105.6	94.4
P53708	Integrin alpha-8 OS=Homo sapiens OX=9606 GN=ITGA8 PE=1 SV=3	0	5	4	4	1063	-0.107018	0.0243536	111.7	88.3
X6R3P0	Slit homolog 2 protein OS=Homo sapiens OX=9606 GN=SLIT2 PE=1 SV=1	0	29	29	29	1542	-0.104337	0.021325	104.1	95.9
A0A0A0MQU6	Sema domain, transmembrane domain (TM), and cytoplasmic domain, (Semaphorin) 6A, isoform CRA_d OS=Homo sapiens OX=9606 GN=SEMA6A PE=1 SV=1	0	11	8	8	1047	-0.104337	0.0226897	122.1	77.9
O60513	Beta-1,4-galactosyltransferase 4 OS=Homo sapiens OX=9606 GN=B4GALT4 PE=1 SV=1	0	9	2	2	344	-0.104337	0.0173157	103.6	96.4
Q9NS69	Mitochondrial import receptor subunit TOM22 homolog OS=Homo sapiens OX=9606 GN=TOMM22 PE=1 SV=3	0.003	8	1	1	142	-0.104337	0.0180482	101.6	98.4
P52429	Diacylglycerol kinase epsilon OS=Homo sapiens OX=9606 GN=DGKE PE=1 SV=1	0	20	8	8	567	-0.102994	0.0241145	104.4	95.6
Q8TCJ2	Dolichyl-diphosphooligosaccharide--protein glycosyltransferase subunit STT3B OS=Homo sapiens OX=9606 GN=STT3B PE=1 SV=1	0	14	11	9	826	-0.102994	0.0204513	104.9	95.1
O94898	Leucine-rich repeats and immunoglobulin-like domains protein 2 OS=Homo sapiens OX=9606 GN=LRIG2 PE=2 SV=3	0	23	19	18	1065	-0.10165	0.0202679	101.5	98.5
Q15818	Neuronal pentraxin-1 OS=Homo sapiens OX=9606 GN=NPTX1 PE=2 SV=2	0	18	7	7	432	-0.10165	0.0226897	92.5	107.5
Q6NUK4	Receptor expression-enhancing protein 3 OS=Homo sapiens OX=9606 GN=REEP3 PE=1 SV=1	0	34	5	5	255	-0.100305	0.0223145	109.8	90.2
Q9P035	Very-long-chain (3R)-3-hydroxyacyl-CoA dehydratase 3 OS=Homo sapiens OX=9606 GN=HACD3 PE=1 SV=2	0	25	8	8	362	-0.100305	0.0226897	103.5	96.5
Q92545	Transmembrane protein 131 OS=Homo sapiens OX=9606 GN=TMEM131 PE=1 SV=3	0	24	29	29	1883	-0.100305	0.0202679	104.1	95.9
P38571	Lysosomal acid lipase/cholesteryl ester hydrolase OS=Homo sapiens OX=9606 GN=LIPA PE=1 SV=2	0	7	2	2	399	-0.100305	0.0226897	105.8	94.2
Q16611	Bcl-2 homologous antagonist/killer OS=Homo sapiens OX=9606 GN=BAK1 PE=1 SV=1	0	33	4	4	211	-0.0989585	0.0218117	94.7	105.3
Q9BVI4	Nucleolar complex protein 4 homolog OS=Homo sapiens OX=9606 GN=NOC4L PE=1 SV=1	0	27	11	11	516	-0.0989585	0.0254882	102.1	97.9
O14967	Calmegin OS=Homo sapiens OX=9606 GN=CLGN PE=1 SV=1	0	19	9	8	610	-0.0989585	0.0229215	103.6	96.4
O95158	Neurexophilin-4 OS=Homo sapiens OX=9606 GN=NXPH4 PE=2 SV=3	0.003	5	1	1	308	-0.0989585	0.0173157	103.4	96.6
Q5VU97	VWFA and cache domain-containing protein 1 OS=Homo sapiens OX=9606 GN=CACHD1 PE=2 SV=2	0	11	10	10	1274	-0.0976108	0.0226897	125.1	74.9
Q86X52	Chondroitin sulfate synthase 1 OS=Homo sapiens OX=9606 GN=CHSY1 PE=1 SV=3	0	8	5	4	802	-0.0976108	0.0173157	105.2	94.8
Q92791	Endoplasmic reticulum protein SC65 OS=Homo sapiens OX=9606 GN=P3H4 PE=1 SV=1	0	32	11	11	437	-0.0962619	0.0197901	105.1	94.9
Q5KU26	Collectin-12 OS=Homo sapiens OX=9606 GN=COLEC12 PE=1 SV=3	0	14	9	9	742	-0.0962619	0.025727	98.5	101.5
Q92520	Protein FAM3C OS=Homo sapiens OX=9606 GN=FAM3C PE=1 SV=1	0	30	5	5	227	-0.0949116	0.0226897	89.4	110.6
Q9BRR6	ADP-dependent glucokinase OS=Homo sapiens OX=9606 GN=ADPGK PE=1 SV=1	0	18	6	6	497	-0.0949116	0.0180482	94.6	105.4
Q9HB40	Retinoid-inducible serine carboxypeptidase OS=Homo sapiens OX=9606 GN=SCPEP1 PE=1 SV=1	0	23	8	8	452	-0.0935602	0.0226897	106.4	93.6
Q9NRP0-2	Isoform 2 of Oligosaccharyltransferase complex subunit OSTC OS=Homo sapiens OX=9606 GN=OSTC	0.001	7	1	1	171	-0.0935602	0.0229215	103.2	96.8
Q9BU23	Lipase maturation factor 2 OS=Homo sapiens OX=9606 GN=LMF2 PE=1 SV=2	0	5	3	3	707	-0.0935602	0.0202679	104	96
Q8N2G4-2	Isoform 2 of Ly6/PLAUR domain-containing protein 1 OS=Homo sapiens OX=9606 GN=LYPD1	0.001	7	1	1	164	-0.0922074	0.0152249	101.8	98.2
P48723	Heat shock 70 kDa protein 13 OS=Homo sapiens OX=9606 GN=HSPA13 PE=1 SV=1	0	13	5	5	471	-0.0894982	0.0212744	102.6	97.4
Q9Y394	Dehydrogenase/reductase SDR family member 7 OS=Homo sapiens OX=9606 GN=DHRS7 PE=1 SV=1	0	12	3	3	339	-0.0894982	0.0180482	100.3	99.7
P35052	Glypican-1 OS=Homo sapiens OX=9606 GN=GPC1 PE=1 SV=2	0.003	5	2	2	558	-0.0894982	0.0150261	98.9	101.1
A1L0T0	Acetolactate synthase-like protein OS=Homo sapiens OX=9606 GN=ILVBL PE=1 SV=2	0	15	5	5	632	-0.0881416	0.0176771	103.2	96.8
P23284	Peptidyl-prolyl cis-trans isomerase B OS=Homo sapiens OX=9606 GN=PPIB PE=1 SV=2	0	46	9	9	216	-0.0867838	0.0173157	100.6	99.4
Q9P2E5	Chondroitin sulfate glucuronyltransferase OS=Homo sapiens OX=9606 GN=CHPF2 PE=2 SV=2	0	31	17	17	772	-0.0867838	0.0226897	101.1	98.9
O75718	Cartilage-associated protein OS=Homo sapiens OX=9606 GN=CRTAP PE=1 SV=1	0	37	14	14	401	-0.0854247	0.0171506	104.7	95.3
Q14696	LRP chaperone MESD OS=Homo sapiens OX=9606 GN=MESD PE=1 SV=2	0	23	5	5	234	-0.0854247	0.0170926	96.1	103.9
P61009	Signal peptidase complex subunit 3 OS=Homo sapiens OX=9606 GN=SPCS3 PE=1 SV=1	0	13	2	2	180	-0.0840643	0.0167346	101.5	98.5
Q16394	Exostosin-1 OS=Homo sapiens OX=9606 GN=EXT1 PE=1 SV=2	0	7	3	3	746	-0.0840643	0.0173157	102.7	97.3
O60313-2	Isoform 2 of Dynamin-like 120 kDa protein, mitochondrial OS=Homo sapiens OX=9606 GN=OPA1	0	14	10	10	997	-0.0827026	0.0162765	101.3	98.7
A0A0C4DFN5	Chromosome 10 open reading frame 61 OS=Homo sapiens OX=9606 GN=TCTN3 PE=1 SV=1	0	10	4	4	625	-0.0827026	0.0214915	102.6	97.4
Q7Z4H8	Protein O-glucosyltransferase 3 OS=Homo sapiens OX=9606 GN=POGLUT3 PE=1 SV=2	0	36	13	13	507	-0.0799754	0.0222902	100.5	99.5
Q9NXS2	Glutaminyl-peptide cyclotransferase-like protein OS=Homo sapiens OX=9606 GN=QPCTL PE=1 SV=2	0	25	6	6	382	-0.0799754	0.0200009	104.4	95.6
Q8WVX9	Fatty acyl-CoA reductase 1 OS=Homo sapiens OX=9606 GN=FAR1 PE=1 SV=1	0	22	8	8	515	-0.0799754	0.0156419	105.3	94.7
O75396	Vesicle-trafficking protein SEC22b OS=Homo sapiens OX=9606 GN=SEC22B PE=1 SV=4	0	21	3	3	215	-0.0799754	0.0202679	101.6	98.4
O14657	Torsin-1B OS=Homo sapiens OX=9606 GN=TOR1B PE=1 SV=2	0	13	3	3	336	-0.0799754	0.0151589	97.6	102.4
Q9NU53	Glycoprotein integral membrane protein 1 OS=Homo sapiens OX=9606 GN=GINM1 PE=2 SV=1	0	12	3	3	330	-0.0799754	0.0177372	92.9	107.1
Q15375	Ephrin type-A receptor 7 OS=Homo sapiens OX=9606 GN=EPHA7 PE=1 SV=3	0	8	6	5	998	-0.0799754	0.0173157	111.7	88.3
Q9Y219	Protein jagged-2 OS=Homo sapiens OX=9606 GN=JAG2 PE=1 SV=3	0	9	7	7	1238	-0.0786098	0.0173157	105.4	94.6
Q9NZV5	Selenoprotein N OS=Homo sapiens OX=9606 GN=SELENON PE=1 SV=5	0	18	7	7	590	-0.077243	0.0226897	104.5	95.5
Q9NRB3	Carbohydrate sulfotransferase 12 OS=Homo sapiens OX=9606 GN=CHST12 PE=2 SV=2	0	13	4	4	414	-0.077243	0.0151589	101.5	98.5
Q9UGP8	Translocation protein SEC63 homolog OS=Homo sapiens OX=9606 GN=SEC63 PE=1 SV=2	0	37	21	21	760	-0.0758749	0.0153482	102.9	97.1
Q96A33	Coiled-coil domain-containing protein 47 OS=Homo sapiens OX=9606 GN=CCDC47 PE=1 SV=1	0	34	13	13	483	-0.0758749	0.0153482	103.2	96.8
Q495W5	Alpha-(1,3)-fucosyltransferase 11 OS=Homo sapiens OX=9606 GN=FUT11 PE=1 SV=1	0	12	3	3	492	-0.0758749	0.0170895	101.9	98.1
Q14703	Membrane-bound transcription factor site-1 protease OS=Homo sapiens OX=9606 GN=MBTPS1 PE=1 SV=1	0	10	8	8	1052	-0.0758749	0.0173157	114.6	85.4
A0A1B0GW05	Probable C-mannosyltransferase DPY19L1 OS=Homo sapiens OX=9606 GN=DPY19L1 PE=1 SV=1	0	6	4	4	748	-0.0758749	0.0153056	104.2	95.8
O14975	Very long-chain acyl-CoA synthetase OS=Homo sapiens OX=9606 GN=SLC27A2 PE=1 SV=2	0	13	6	6	620	-0.0745054	0.0171506	101.9	98.1
P23229	Integrin alpha-6 OS=Homo sapiens OX=9606 GN=ITGA6 PE=1 SV=5	0	10	8	8	1130	-0.0745054	0.0152249	112.8	87.2
Q8N5G2	Macoilin OS=Homo sapiens OX=9606 GN=MACO1 PE=1 SV=1	0	16	6	6	664	-0.0731347	0.0173157	99.6	100.4
P36897	TGF-beta receptor type-1 OS=Homo sapiens OX=9606 GN=TGFBR1 PE=1 SV=1	0	9	3	3	503	-0.0731347	0.0156184	101.6	98.4
Q99720	Sigma non-opioid intracellular receptor 1 OS=Homo sapiens OX=9606 GN=SIGMAR1 PE=1 SV=1	0	9	2	2	223	-0.0731347	0.0162765	106.1	93.9
A0A140T9H5	HLA class I histocompatibility antigen, C alpha chain OS=Homo sapiens OX=9606 GN=HLA-C PE=1 SV=1	0	34	8	4	372	-0.0690147	0.0151589	100.9	99.1
Q9NY97	N-acetyllactosaminide beta-1,3-N-acetylglucosaminyltransferase 2 OS=Homo sapiens OX=9606 GN=B3GNT2 PE=1 SV=2	0	7	2	2	397	-0.0676387	0.00922386	103.4	96.6
Q02809	Procollagen-lysine,2-oxoglutarate 5-dioxygenase 1 OS=Homo sapiens OX=9606 GN=PLOD1 PE=1 SV=2	0	45	24	24	727	-0.0662614	0.0150261	101.7	98.3
Q6UWW8	Carboxylesterase 3 OS=Homo sapiens OX=9606 GN=CES3 PE=1 SV=1	0	15	5	5	571	-0.0662614	0.0156419	100.2	99.8
P51648-2	Isoform 2 of Aldehyde dehydrogenase family 3 member A2 OS=Homo sapiens OX=9606 GN=ALDH3A2	0	23	9	9	508	-0.0648829	0.0197901	101.1	98.9
Q96JA1	Leucine-rich repeats and immunoglobulin-like domains protein 1 OS=Homo sapiens OX=9606 GN=LRIG1 PE=1 SV=2	0	18	13	12	1093	-0.0648829	0.016564	103.3	96.7
Q9H1J7	Protein Wnt-5b OS=Homo sapiens OX=9606 GN=WNT5B PE=2 SV=2	0	15	4	3	359	-0.0648829	0.0146862	98.6	101.4
P32189	Glycerol kinase OS=Homo sapiens OX=9606 GN=GK PE=1 SV=3	0	43	18	18	559	-0.0621217	0.0139613	101	99
Q9UBS4	DnaJ homolog subfamily B member 11 OS=Homo sapiens OX=9606 GN=DNAJB11 PE=1 SV=1	0	30	7	7	358	-0.0621217	0.0139785	102.2	97.8
O00469-2	Isoform 2 of Procollagen-lysine,2-oxoglutarate 5-dioxygenase 2 OS=Homo sapiens OX=9606 GN=PLOD2	0	26	16	16	758	-0.0621217	0.0173157	94.2	105.8
Q8TEB9	Rhomboid-related protein 4 OS=Homo sapiens OX=9606 GN=RHBDD1 PE=1 SV=1	0	13	3	3	315	-0.0621217	0.0145316	101	99
Q9UJJ9	N-acetylglucosamine-1-phosphotransferase subunit gamma OS=Homo sapiens OX=9606 GN=GNPTG PE=1 SV=1	0	15	3	3	305	-0.0607392	0.0122711	104.8	95.2
Q9NZR2	Low-density lipoprotein receptor-related protein 1B OS=Homo sapiens OX=9606 GN=LRP1B PE=1 SV=2	0	5	15	14	4599	-0.0607392	0.0168996	104.7	95.3
Q86TM6	E3 ubiquitin-protein ligase synoviolin OS=Homo sapiens OX=9606 GN=SYVN1 PE=1 SV=2	0	14	8	8	617	-0.0579701	0.0122711	101.4	98.6
Q5T9L3-2	Isoform 2 of Protein wntless homolog OS=Homo sapiens OX=9606 GN=WLS	0	11	5	5	543	-0.0579701	0.0156352	102.6	97.4
Q9Y2A7-2	Isoform 2 of Nck-associated protein 1 OS=Homo sapiens OX=9606 GN=NCKAP1	0	7	6	6	1134	-0.0579701	0.0140272	101.5	98.5
Q9BVC6	Transmembrane protein 109 OS=Homo sapiens OX=9606 GN=TMEM109 PE=1 SV=1	0.001	5	1	1	243	-0.0579701	0.0104655	102	98
P50454	Serpin H1 OS=Homo sapiens OX=9606 GN=SERPINH1 PE=1 SV=2	0	43	15	15	418	-0.0565835	0.0120268	99.2	100.8
Q6UW63	Protein O-glucosyltransferase 2 OS=Homo sapiens OX=9606 GN=POGLUT2 PE=1 SV=1	0	27	10	10	502	-0.0565835	0.0153482	100.7	99.3
Q10471	Polypeptide N-acetylgalactosaminyltransferase 2 OS=Homo sapiens OX=9606 GN=GALNT2 PE=1 SV=1	0	21	9	8	571	-0.0565835	0.0156352	100	100
Q92820	Gamma-glutamyl hydrolase OS=Homo sapiens OX=9606 GN=GGH PE=1 SV=2	0	20	6	6	318	-0.0565835	0.0153482	95.3	104.7
P54760	Ephrin type-B receptor 4 OS=Homo sapiens OX=9606 GN=EPHB4 PE=1 SV=2	0	6	5	4	987	-0.0565835	0.0117654	95.5	104.5
Q6PKC3	Thioredoxin domain-containing protein 11 OS=Homo sapiens OX=9606 GN=TXNDC11 PE=1 SV=2	0	15	11	11	985	-0.0551957	0.0154634	104	96
O75197	Low-density lipoprotein receptor-related protein 5 OS=Homo sapiens OX=9606 GN=LRP5 PE=1 SV=2	0	9	10	7	1615	-0.0551957	0.0150716	99.2	100.8
O76094	Signal recognition particle subunit SRP72 OS=Homo sapiens OX=9606 GN=SRP72 PE=1 SV=3	0	9	4	4	671	-0.0551957	0.00939662	102.1	97.9
A2VDJ0-5	Isoform 4 of Transmembrane protein 131-like OS=Homo sapiens OX=9606 GN=TMEM131L	0	9	13	13	1610	-0.0551957	0.0156391	114.4	85.6
A0A087WT44	Heme oxygenase 2 OS=Homo sapiens OX=9606 GN=HMOX2 PE=1 SV=1	0	40	10	10	370	-0.0538064	0.0153482	100.4	99.6
Q70UQ0	Inhibitor of nuclear factor kappa-B kinase-interacting protein OS=Homo sapiens OX=9606 GN=IKBIP PE=1 SV=1	0	32	11	9	350	-0.0538064	0.0111296	102.5	97.5
Q8IXB1-2	Isoform 2 of DnaJ homolog subfamily C member 10 OS=Homo sapiens OX=9606 GN=DNAJC10	0	30	14	1	747	-0.0538064	0.0104655	100.8	99.2
Q5NDL2	EGF domain-specific O-linked N-acetylglucosamine transferase OS=Homo sapiens OX=9606 GN=EOGT PE=1 SV=1	0	15	7	7	527	-0.0538064	0.012193	101.7	98.3
Q13505	Metaxin-1 OS=Homo sapiens OX=9606 GN=MTX1 PE=1 SV=3	0	12	4	4	466	-0.0538064	0.0108018	99.5	100.5
Q96TC7	Regulator of microtubule dynamics protein 3 OS=Homo sapiens OX=9606 GN=RMDN3 PE=1 SV=2	0	10	3	3	470	-0.0538064	0.0110045	101.9	98.1
Q9Y2G5	GDP-fucose protein O-fucosyltransferase 2 OS=Homo sapiens OX=9606 GN=POFUT2 PE=1 SV=3	0	25	9	9	429	-0.0524159	0.0151589	114.1	85.9
O15230	Laminin subunit alpha-5 OS=Homo sapiens OX=9606 GN=LAMA5 PE=1 SV=8	0	13	34	33	3695	-0.051024	0.0162765	100.7	99.3
Q8N138	ORM1-like protein 3 OS=Homo sapiens OX=9606 GN=ORMDL3 PE=1 SV=1	0.001	10	1	1	153	-0.051024	0.0104655	101.7	98.3
A0A0A0MSV9	Tapasin OS=Homo sapiens OX=9606 GN=TAPBP PE=1 SV=1	0	6	3	3	504	-0.051024	0.0151589	101.1	98.9
Q9Y2G8	DnaJ homolog subfamily C member 16 OS=Homo sapiens OX=9606 GN=DNAJC16 PE=2 SV=3	0	25	14	14	782	-0.0496308	0.0153482	95.5	104.5
P78536	Disintegrin and metalloproteinase domain-containing protein 17 OS=Homo sapiens OX=9606 GN=ADAM17 PE=1 SV=1	0	22	13	13	824	-0.0496308	0.0151589	99.5	100.5
A0A0C4DFL7	Lanosterol 14-alpha demethylase OS=Homo sapiens OX=9606 GN=CYP51A1 PE=1 SV=1	0	5	2	2	509	-0.0496308	0.0122711	103.1	96.9
O43505	Beta-1,4-glucuronyltransferase 1 OS=Homo sapiens OX=9606 GN=B4GAT1 PE=1 SV=1	0	23	5	5	415	-0.0468403	0.0146862	103.2	96.8
Q9NRA1	Platelet-derived growth factor C OS=Homo sapiens OX=9606 GN=PDGFC PE=1 SV=2	0	14	4	4	345	-0.0468403	0.00762274	99.9	100.1
O15260	Surfeit locus protein 4 OS=Homo sapiens OX=9606 GN=SURF4 PE=1 SV=3	0	12	3	3	269	-0.045443	0.0122046	100	100
Q6UW68	Transmembrane protein 205 OS=Homo sapiens OX=9606 GN=TMEM205 PE=1 SV=1	0	9	1	1	189	-0.0440443	0.0111296	100.7	99.3
Q96G23	Ceramide synthase 2 OS=Homo sapiens OX=9606 GN=CERS2 PE=1 SV=1	0	7	2	2	380	-0.0440443	0.00861078	99.5	100.5
Q9P2B2	Prostaglandin F2 receptor negative regulator OS=Homo sapiens OX=9606 GN=PTGFRN PE=1 SV=2	0	5	4	4	879	-0.0440443	0.00881901	98.1	101.9
Q9UNW1	Multiple inositol polyphosphate phosphatase 1 OS=Homo sapiens OX=9606 GN=MINPP1 PE=1 SV=1	0	6	2	2	487	-0.0426443	0.00681627	100.4	99.6
Q8TBM8	DnaJ homolog subfamily B member 14 OS=Homo sapiens OX=9606 GN=DNAJB14 PE=1 SV=1	0	9	3	3	379	-0.041243	0.00735236	101.4	98.6
P29317	Ephrin type-A receptor 2 OS=Homo sapiens OX=9606 GN=EPHA2 PE=1 SV=2	0	9	7	6	976	-0.0398403	0.0131069	100.5	99.5
P06756	Integrin alpha-V OS=Homo sapiens OX=9606 GN=ITGAV PE=1 SV=2	0	24	19	19	1048	-0.0384362	0.0151589	100.7	99.3
Q68CR1	Protein sel-1 homolog 3 OS=Homo sapiens OX=9606 GN=SEL1L3 PE=1 SV=2	0	11	8	8	1132	-0.0384362	0.00861078	100.4	99.6
A0A087WZ62	Mannosyltransferase OS=Homo sapiens OX=9606 PE=3 SV=1	0	5	3	3	844	-0.0384362	0.00735236	100.8	99.2
Q9UKV5	E3 ubiquitin-protein ligase AMFR OS=Homo sapiens OX=9606 GN=AMFR PE=1 SV=2	0	15	5	5	643	-0.0356239	0.0111296	106.2	93.8
A0A0A0MQS9	Laminin subunit alpha-4 OS=Homo sapiens OX=9606 GN=LAMA4 PE=1 SV=1	0	7	8	8	1823	-0.0356239	0.00681627	91.8	108.2
Q99943	1-acyl-sn-glycerol-3-phosphate acyltransferase alpha OS=Homo sapiens OX=9606 GN=AGPAT1 PE=1 SV=2	0	21	4	4	283	-0.0342157	0.0122711	102.3	97.7
P55268	Laminin subunit beta-2 OS=Homo sapiens OX=9606 GN=LAMB2 PE=1 SV=2	0	17	20	20	1798	-0.0342157	0.0120268	101.3	98.7
Q86XL3	Ankyrin repeat and LEM domain-containing protein 2 OS=Homo sapiens OX=9606 GN=ANKLE2 PE=1 SV=4	0	15	9	9	938	-0.0328061	0.00735236	100.1	99.9
P22629	Streptavidin OS=Streptomyces avidinii PE=1 SV=1	0	43	9	9	183	-0.0313952	0.00681627	103.7	96.3
Q14165	Malectin OS=Homo sapiens OX=9606 GN=MLEC PE=1 SV=1	0	38	8	8	292	-0.0313952	0.0126165	93.4	106.6
P14625	Endoplasmin OS=Homo sapiens OX=9606 GN=HSP90B1 PE=1 SV=1	0	55	41	39	803	-0.0299829	0.00681627	101.6	98.4
Q96KA5	Cleft lip and palate transmembrane protein 1-like protein OS=Homo sapiens OX=9606 GN=CLPTM1L PE=1 SV=1	0	17	6	6	538	-0.0299829	0.0108018	101.2	98.8
Q75T13	GPI inositol-deacylase OS=Homo sapiens OX=9606 GN=PGAP1 PE=1 SV=1	0	11	8	8	922	-0.0299829	0.0109568	101	99
A0A3B3ISF9	Endothelin-converting enzyme 1 OS=Homo sapiens OX=9606 GN=ECE1 PE=1 SV=1	0	11	6	6	842	-0.0299829	0.0111296	102.5	97.5
Q6NUM9	All-trans-retinol 13,14-reductase OS=Homo sapiens OX=9606 GN=RETSAT PE=1 SV=2	0	10	4	4	610	-0.0299829	0.00685421	102.9	97.1
H7BZJ3	Protein disulfide-isomerase A3 (Fragment) OS=Homo sapiens OX=9606 GN=PDIA3 PE=1 SV=1	0	32	3	1	123	-0.0285692	0.0104655	101	99
O96005	Cleft lip and palate transmembrane protein 1 OS=Homo sapiens OX=9606 GN=CLPTM1 PE=1 SV=1	0	17	10	10	669	-0.0285692	0.014129	97	103
Q8N4A0	Polypeptide N-acetylgalactosaminyltransferase 4 OS=Homo sapiens OX=9606 GN=GALNT4 PE=1 SV=2	0	8	4	2	578	-0.0285692	0.00861078	98.1	101.9
P04843	Dolichyl-diphosphooligosaccharide--protein glycosyltransferase subunit 1 OS=Homo sapiens OX=9606 GN=RPN1 PE=1 SV=1	0	39	16	16	607	-0.0271541	0.00681627	101.3	98.7
B1ALM5	Transmembrane protein 9 OS=Homo sapiens OX=9606 GN=TMEM9 PE=1 SV=1	0	10	1	1	186	-0.0271541	0.00681627	101	99
Q9Y672	Dolichyl pyrophosphate Man9GlcNAc2 alpha-1,3-glucosyltransferase OS=Homo sapiens OX=9606 GN=ALG6 PE=1 SV=2	0	5	2	2	507	-0.0271541	0.00861078	101.1	98.9
Q13444	Disintegrin and metalloproteinase domain-containing protein 15 OS=Homo sapiens OX=9606 GN=ADAM15 PE=1 SV=4	0	16	10	10	863	-0.0257376	0.0104655	101.1	98.9
Q969Y0	NXPE family member 3 OS=Homo sapiens OX=9606 GN=NXPE3 PE=2 SV=1	0	5	2	2	559	-0.0257376	0.00613614	99.6	100.4
P08240	Signal recognition particle receptor subunit alpha OS=Homo sapiens OX=9606 GN=SRPRA PE=1 SV=2	0	23	12	12	638	-0.0214797	0.00535755	99.3	100.7
P21964	Catechol O-methyltransferase OS=Homo sapiens OX=9606 GN=COMT PE=1 SV=2	0	20	4	4	271	-0.0214797	0.00685421	101	99
Q9BY50	Signal peptidase complex catalytic subunit SEC11C OS=Homo sapiens OX=9606 GN=SEC11C PE=1 SV=3	0	20	3	3	192	-0.0214797	0.00912679	104.5	95.5
Q8WUJ1	Neuferricin OS=Homo sapiens OX=9606 GN=CYB5D2 PE=2 SV=1	0	17	3	3	264	-0.0214797	0.00667888	96.9	103.1
P61011	Signal recognition particle 54 kDa protein OS=Homo sapiens OX=9606 GN=SRP54 PE=1 SV=1	0	17	7	7	504	-0.0214797	0.00535755	89.6	110.4
Q9UNK0	Syntaxin-8 OS=Homo sapiens OX=9606 GN=STX8 PE=1 SV=2	0	12	2	2	236	-0.0214797	0.00681627	100.6	99.4
P41221	Protein Wnt-5a OS=Homo sapiens OX=9606 GN=WNT5A PE=1 SV=2	0	11	3	2	380	-0.0214797	0.00663698	101.8	98.2
A0A590UJK3	Sarcolemmal membrane-associated protein OS=Homo sapiens OX=9606 GN=SLMAP PE=4 SV=1	0	8	6	6	842	-0.0214797	0.00681627	101.1	98.9
Q9UBU6	Protein FAM8A1 OS=Homo sapiens OX=9606 GN=FAM8A1 PE=1 SV=1	0	40	9	9	413	-0.0200577	0.00526822	88.9	111.1
Q12907	Vesicular integral-membrane protein VIP36 OS=Homo sapiens OX=9606 GN=LMAN2 PE=1 SV=1	0	53	13	13	356	-0.0186342	0.00526822	100.1	99.9
Q92896-2	Isoform 2 of Golgi apparatus protein 1 OS=Homo sapiens OX=9606 GN=GLG1	0	23	19	19	1203	-0.0186342	0.0104655	99.6	100.4
Q6Y288	Beta-1,3-glucosyltransferase OS=Homo sapiens OX=9606 GN=B3GLCT PE=1 SV=2	0	7	3	3	498	-0.0186342	0.00587798	96.5	103.5
Q9UBH6	Xenotropic and polytropic retrovirus receptor 1 OS=Homo sapiens OX=9606 GN=XPR1 PE=1 SV=1	0	6	3	3	696	-0.0186342	0.00144032	103.7	96.3
Q9Y6A1	Protein O-mannosyl-transferase 1 OS=Homo sapiens OX=9606 GN=POMT1 PE=1 SV=3	0	5	3	3	747	-0.0186342	0.00526822	96.6	103.4
P18850	Cyclic AMP-dependent transcription factor ATF-6 alpha OS=Homo sapiens OX=9606 GN=ATF6 PE=1 SV=3	0	20	11	11	670	-0.0172093	0.0104655	98.8	101.2
P67812-3	Isoform 3 of Signal peptidase complex catalytic subunit SEC11A OS=Homo sapiens OX=9606 GN=SEC11A	0	15	3	3	185	-0.0172093	0.00526822	104.2	95.8
P13612	Integrin alpha-4 OS=Homo sapiens OX=9606 GN=ITGA4 PE=1 SV=3	0	7	6	6	1032	-0.0143553	0.00681627	99.7	100.3
P37108	Signal recognition particle 14 kDa protein OS=Homo sapiens OX=9606 GN=SRP14 PE=1 SV=2	0	26	3	3	136	-0.0129262	0.00566918	95.7	104.3
Q8NBL1	Protein O-glucosyltransferase 1 OS=Homo sapiens OX=9606 GN=POGLUT1 PE=1 SV=1	0	18	6	6	392	-0.0129262	0.00735236	101.1	98.9
Q9BRK0-2	Isoform 2 of Receptor expression-enhancing protein 2 OS=Homo sapiens OX=9606 GN=REEP2	0.001	9	1	1	254	-0.0129262	0.00399464	91.2	108.8
Q96HE7	ERO1-like protein alpha OS=Homo sapiens OX=9606 GN=ERO1A PE=1 SV=2	0	56	19	18	468	-0.0114956	0.00354454	101.7	98.3
Q96F46-2	Isoform 2 of Interleukin-17 receptor A OS=Homo sapiens OX=9606 GN=IL17RA	0	21	10	10	832	-0.0114956	0.00775419	99.6	100.4
A0A286YFF7	Palmitoyl-protein thioesterase 1 OS=Homo sapiens OX=9606 GN=PPT1 PE=1 SV=1	0	10	2	2	335	-0.0114956	0.00667888	99.2	100.8
Q9NTJ5	Phosphatidylinositide phosphatase SAC1 OS=Homo sapiens OX=9606 GN=SACM1L PE=1 SV=2	0	9	4	4	587	-0.0114956	0.00681627	91.6	108.4
O14672	Disintegrin and metalloproteinase domain-containing protein 10 OS=Homo sapiens OX=9606 GN=ADAM10 PE=1 SV=1	0	21	12	12	748	-0.00863031	0.00761004	99.1	100.9
A0A1W2PNP0	GPI transamidase component PIG-T (Fragment) OS=Homo sapiens OX=9606 GN=PIGT PE=1 SV=1	0	18	8	4	580	-0.00863031	0.00535755	109.2	90.8
Q9GZU3	Transmembrane protein 39B OS=Homo sapiens OX=9606 GN=TMEM39B PE=1 SV=1	0	30	9	9	492	-0.0071955	0.00681627	106.2	93.8
Q9H1I8	Activating signal cointegrator 1 complex subunit 2 OS=Homo sapiens OX=9606 GN=ASCC2 PE=1 SV=3	0	13	6	6	757	-0.0071955	0.00663698	101.6	98.4
Q8WXH0-2	Isoform 2 of Nesprin-2 OS=Homo sapiens OX=9606 GN=SYNE2	0	8	42	42	6907	-0.0071955	0.00681627	96.4	103.6
Q8N9N2-2	Isoform 2 of Activating signal cointegrator 1 complex subunit 1 OS=Homo sapiens OX=9606 GN=ASCC1	0	6	2	2	357	-0.0071955	0.00234311	98.2	101.8
J3KQJ1	Inactive C-alpha-formylglycine-generating enzyme 2 OS=Homo sapiens OX=9606 GN=SUMF2 PE=1 SV=1	0	22	7	7	320	-0.00432161	0.00681627	99	101
P37287	Phosphatidylinositol N-acetylglucosaminyltransferase subunit A OS=Homo sapiens OX=9606 GN=PIGA PE=1 SV=1	0	11	4	4	484	-0.00432161	4.29047e-05	96.9	103.1
P16278	Beta-galactosidase OS=Homo sapiens OX=9606 GN=GLB1 PE=1 SV=2	0	20	10	9	677	-0.00288251	0.00681627	99.4	100.6
Q9Y644	Beta-1,3-N-acetylglucosaminyltransferase radical fringe OS=Homo sapiens OX=9606 GN=RFNG PE=2 SV=3	0	10	2	2	331	-0.00288251	0.00283944	100.1	99.9
Q6UWP7	Lysocardiolipin acyltransferase 1 OS=Homo sapiens OX=9606 GN=LCLAT1 PE=1 SV=1	0	8	3	3	414	-0.00288251	0.00613614	99.6	100.4
O15270	Serine palmitoyltransferase 2 OS=Homo sapiens OX=9606 GN=SPTLC2 PE=1 SV=1	0	7	3	3	562	-0.00288251	0.000239336	103.7	96.3
P13497	Bone morphogenetic protein 1 OS=Homo sapiens OX=9606 GN=BMP1 PE=1 SV=2	0	5	3	3	986	-0.00288251	0.0032407	98	102
P17152	Transmembrane protein 11, mitochondrial OS=Homo sapiens OX=9606 GN=TMEM11 PE=1 SV=1	0	17	3	3	192	-0.00144197	0.00231072	98.4	101.6
Q8NHP6	Motile sperm domain-containing protein 2 OS=Homo sapiens OX=9606 GN=MOSPD2 PE=1 SV=1	0	5	2	2	518	-0.00144197	0.00234311	102.1	97.9
Q96S52	GPI transamidase component PIG-S OS=Homo sapiens OX=9606 GN=PIGS PE=1 SV=3	0	30	11	11	555	0	0.00667888	99.5	100.5
Q9BV94	ER degradation-enhancing alpha-mannosidase-like protein 2 OS=Homo sapiens OX=9606 GN=EDEM2 PE=1 SV=2	0	24	10	10	578	0	0.00662602	87.1	112.9
Q8IWF2	FAD-dependent oxidoreductase domain-containing protein 2 OS=Homo sapiens OX=9606 GN=FOXRED2 PE=1 SV=1	0	23	11	11	684	0	0.00681627	97.2	102.8
Q02818	Nucleobindin-1 OS=Homo sapiens OX=9606 GN=NUCB1 PE=1 SV=4	0	29	9	9	461	0.00144342	0.00681627	100.3	99.7
Q12981-1	Isoform 3 of Vesicle transport protein SEC20 OS=Homo sapiens OX=9606 GN=BNIP1	0	31	6	6	271	0.00288828	0.00335707	96.9	103.1
Q8IYK4	Procollagen galactosyltransferase 2 OS=Homo sapiens OX=9606 GN=COLGALT2 PE=1 SV=1	0	7	4	4	626	0.00288828	0.00202542	118.5	81.5
O43852-3	Isoform 3 of Calumenin OS=Homo sapiens OX=9606 GN=CALU	0	42	11	4	323	0.00433459	0.00663698	91.9	108.1
Q9P0L0	Vesicle-associated membrane protein-associated protein A OS=Homo sapiens OX=9606 GN=VAPA PE=1 SV=3	0	34	6	5	249	0.00433459	0.0014952	104.4	95.6
A0A0A0MTI1	Delta(24)-sterol reductase OS=Homo sapiens OX=9606 GN=DHCR24 PE=1 SV=1	0	15	6	6	528	0.00723157	0.00350144	103.8	96.2
P51688	N-sulphoglucosamine sulphohydrolase OS=Homo sapiens OX=9606 GN=SGSH PE=1 SV=1	0	10	5	5	502	0.00723157	0.00179422	100	100
Q6ZRP7	Sulfhydryl oxidase 2 OS=Homo sapiens OX=9606 GN=QSOX2 PE=1 SV=3	0	24	13	13	698	0.00868224	0.00335707	105.2	94.8
Q9NV96	Cell cycle control protein 50A OS=Homo sapiens OX=9606 GN=TMEM30A PE=1 SV=1	0	10	3	3	361	0.0101344	0.000176757	100.1	99.9
P30533	Alpha-2-macroglobulin receptor-associated protein OS=Homo sapiens OX=9606 GN=LRPAP1 PE=1 SV=1	0	24	8	8	357	0.011588	4.29047e-05	104.3	95.7
O00468	Agrin OS=Homo sapiens OX=9606 GN=AGRN PE=1 SV=6	0	15	22	22	2068	0.011588	0.00526822	99.1	100.9
Q9H1A3	Methyltransferase-like protein 9 OS=Homo sapiens OX=9606 GN=METTL9 PE=2 SV=1	0	13	3	3	318	0.013043	0.00181967	99.3	100.7
Q8IXI2-3	Isoform 3 of Mitochondrial Rho GTPase 1 OS=Homo sapiens OX=9606 GN=RHOT1	0	10	6	5	691	0.013043	0.00179422	93.2	106.8
Q9HDC9	Adipocyte plasma membrane-associated protein OS=Homo sapiens OX=9606 GN=APMAP PE=1 SV=2	0	31	10	10	416	0.0144996	0.00526822	100.7	99.3
O94766	Galactosylgalactosylxylosylprotein 3-beta-glucuronosyltransferase 3 OS=Homo sapiens OX=9606 GN=B3GAT3 PE=1 SV=2	0	8	3	3	335	0.0159576	4.29047e-05	96.1	103.9
Q07065	Cytoskeleton-associated protein 4 OS=Homo sapiens OX=9606 GN=CKAP4 PE=1 SV=2	0	50	26	26	602	0.0174171	4.29047e-05	97.1	102.9
Q8IW92	Beta-galactosidase-1-like protein 2 OS=Homo sapiens OX=9606 GN=GLB1L2 PE=2 SV=1	0	14	7	7	636	0.018878	0.000792406	95.3	104.7
Q99435-3	Isoform 3 of Protein kinase C-binding protein NELL2 OS=Homo sapiens OX=9606 GN=NELL2	0	11	8	8	866	0.018878	4.29047e-05	98.1	101.9
Q8WUY1	Protein THEM6 OS=Homo sapiens OX=9606 GN=THEM6 PE=1 SV=2	0	32	6	6	208	0.0203404	0.00231072	90.7	109.3
P56557	Transmembrane protein 50B OS=Homo sapiens OX=9606 GN=TMEM50B PE=1 SV=2	0.001	8	1	1	158	0.0203404	4.29047e-05	99.3	100.7
Q13217	DnaJ homolog subfamily C member 3 OS=Homo sapiens OX=9606 GN=DNAJC3 PE=1 SV=1	0	50	16	16	504	0.0232698	4.29047e-05	100.7	99.3
P39656	Dolichyl-diphosphooligosaccharide--protein glycosyltransferase 48 kDa subunit OS=Homo sapiens OX=9606 GN=DDOST PE=1 SV=4	0	43	12	12	456	0.0232698	4.29047e-05	101.6	98.4
Q9Y6A9	Signal peptidase complex subunit 1 OS=Homo sapiens OX=9606 GN=SPCS1 PE=1 SV=5	0	10	2	2	169	0.0232698	4.29047e-05	92	108
Q96AG4	Leucine-rich repeat-containing protein 59 OS=Homo sapiens OX=9606 GN=LRRC59 PE=1 SV=1	0	45	12	12	307	0.0262051	0.000239336	101.5	98.5
Q00325-2	Isoform B of Phosphate carrier protein, mitochondrial OS=Homo sapiens OX=9606 GN=SLC25A3	0	30	8	8	361	0.027675	0.00179422	101.5	98.5
Q8N3C0	Activating signal cointegrator 1 complex subunit 3 OS=Homo sapiens OX=9606 GN=ASCC3 PE=1 SV=3	0	15	25	25	2202	0.027675	0.00138665	101.3	98.7
Q16880	2-hydroxyacylsphingosine 1-beta-galactosyltransferase OS=Homo sapiens OX=9606 GN=UGT8 PE=2 SV=2	0	10	4	4	541	0.027675	0.000155649	91.5	108.5
O95292	Vesicle-associated membrane protein-associated protein B/C OS=Homo sapiens OX=9606 GN=VAPB PE=1 SV=3	0	34	6	5	243	0.0291463	0.00138665	97.5	102.5
P78357	Contactin-associated protein 1 OS=Homo sapiens OX=9606 GN=CNTNAP1 PE=1 SV=1	0	16	17	17	1384	0.0291463	0.00179422	98	102
M0QYN0	Myeloid-derived growth factor OS=Homo sapiens OX=9606 GN=MYDGF PE=1 SV=1	0	11	2	2	189	0.0291463	4.29047e-05	108.1	91.9
E9PGC5	Receptor-type tyrosine-protein phosphatase kappa OS=Homo sapiens OX=9606 GN=PTPRK PE=1 SV=1	0	6	7	7	1472	0.0320936	0.000239336	107.7	92.3
P04844	Dolichyl-diphosphooligosaccharide--protein glycosyltransferase subunit 2 OS=Homo sapiens OX=9606 GN=RPN2 PE=1 SV=3	0	44	18	9	631	0.0335695	0.00179422	98.6	101.4
P49458	Signal recognition particle 9 kDa protein OS=Homo sapiens OX=9606 GN=SRP9 PE=1 SV=2	0	22	2	2	86	0.0335695	0.00179422	101.9	98.1
P08195-4	Isoform 4 of 4F2 cell-surface antigen heavy chain OS=Homo sapiens OX=9606 GN=SLC3A2	0	14	7	7	661	0.0335695	4.29047e-05	102.1	97.9
Q5SGD2	Protein phosphatase 1L OS=Homo sapiens OX=9606 GN=PPM1L PE=1 SV=1	0.003	9	2	2	360	0.0335695	4.29047e-05	100.5	99.5
H3BP20	Beta-hexosaminidase OS=Homo sapiens OX=9606 GN=HEXA PE=1 SV=1	0	31	13	12	540	0.0350469	4.29047e-05	97.2	102.8
Q96DA6	Mitochondrial import inner membrane translocase subunit TIM14 OS=Homo sapiens OX=9606 GN=DNAJC19 PE=1 SV=3	0	13	2	2	116	0.0365259	0.000795659	98.1	101.9
Q9P003	Protein cornichon homolog 4 OS=Homo sapiens OX=9606 GN=CNIH4 PE=1 SV=1	0	14	1	1	139	0.0380063	4.29047e-05	98.4	101.6
P42702	Leukemia inhibitory factor receptor OS=Homo sapiens OX=9606 GN=LIFR PE=1 SV=1	0	14	12	12	1097	0.0409718	0.00129175	97.8	102.2
Q9H1E5	Thioredoxin-related transmembrane protein 4 OS=Homo sapiens OX=9606 GN=TMX4 PE=1 SV=1	0	11	3	3	349	0.0409718	0.000795659	98.6	101.4
P24390	ER lumen protein-retaining receptor 1 OS=Homo sapiens OX=9606 GN=KDELR1 PE=1 SV=1	0	17	2	2	212	0.0424568	4.29047e-05	104.9	95.1
O75976	Carboxypeptidase D OS=Homo sapiens OX=9606 GN=CPD PE=1 SV=2	0	21	21	21	1380	0.0439433	0.00264229	104.6	95.4
Q8IY17	Neuropathy target esterase OS=Homo sapiens OX=9606 GN=PNPLA6 PE=1 SV=3	0	19	19	19	1375	0.0439433	4.29047e-05	95.4	104.6
Q9H9B4	Sideroflexin-1 OS=Homo sapiens OX=9606 GN=SFXN1 PE=1 SV=4	0	39	9	9	322	0.0454314	4.29047e-05	97.6	102.4
Q9H488	GDP-fucose protein O-fucosyltransferase 1 OS=Homo sapiens OX=9606 GN=POFUT1 PE=1 SV=1	0	28	7	7	388	0.0454314	0.0032407	97.3	102.7
Q15738	Sterol-4-alpha-carboxylate 3-dehydrogenase, decarboxylating OS=Homo sapiens OX=9606 GN=NSDHL PE=1 SV=2	0	25	6	6	373	0.0454314	4.29047e-05	97.7	102.3
Q86VR2	Reticulophagy regulator 3 OS=Homo sapiens OX=9606 GN=RETREG3 PE=1 SV=1	0	11	3	3	466	0.0454314	0.00350144	96.8	103.2
P07099	Epoxide hydrolase 1 OS=Homo sapiens OX=9606 GN=EPHX1 PE=1 SV=1	0	16	6	6	455	0.046921	0.000239336	97.2	102.8
Q8NDZ4	Divergent protein kinase domain 2A OS=Homo sapiens OX=9606 GN=DIPK2A PE=1 SV=1	0	16	6	6	430	0.046921	4.29047e-05	104.2	95.8
Q5JPE7	Nodal modulator 2 OS=Homo sapiens OX=9606 GN=NOMO2 PE=1 SV=1	0	45	34	34	1267	0.0484122	0.00411329	99.8	100.2
O94901-9	Isoform 9 of SUN domain-containing protein 1 OS=Homo sapiens OX=9606 GN=SUN1	0	25	16	16	916	0.0484122	4.29047e-05	97	103
P12273	Prolactin-inducible protein OS=Homo sapiens OX=9606 GN=PIP PE=1 SV=1	0	16	2	2	146	0.0484122	0.00179422	98.3	101.7
Q8IV08	Phospholipase D3 OS=Homo sapiens OX=9606 GN=PLD3 PE=1 SV=1	0	25	8	8	490	0.0499049	4.29047e-05	99.2	100.8
X5CMH5	Antigen peptide transporter 2 OS=Homo sapiens OX=9606 GN=TAP2 PE=1 SV=1	0	11	5	5	703	0.0499049	4.29047e-05	101.5	98.5
Q92673	Sortilin-related receptor OS=Homo sapiens OX=9606 GN=SORL1 PE=1 SV=2	0	5	9	9	2214	0.0513992	0.00217163	98.3	101.7
Q6NUQ4	Transmembrane protein 214 OS=Homo sapiens OX=9606 GN=TMEM214 PE=1 SV=2	0	12	6	6	689	0.0528949	0.00179422	106.2	93.8
Q9H490	Phosphatidylinositol glycan anchor biosynthesis class U protein OS=Homo sapiens OX=9606 GN=PIGU PE=1 SV=3	0	6	2	2	435	0.0528949	0.00335707	96.9	103.1
Q92643	GPI-anchor transamidase OS=Homo sapiens OX=9606 GN=PIGK PE=1 SV=2	0	24	8	8	395	0.0558912	0.000795659	95.7	104.3
P61803	Dolichyl-diphosphooligosaccharide--protein glycosyltransferase subunit DAD1 OS=Homo sapiens OX=9606 GN=DAD1 PE=1 SV=3	0	19	2	2	113	0.0558912	4.29047e-05	97.5	102.5
Q9BUN8	Derlin-1 OS=Homo sapiens OX=9606 GN=DERL1 PE=1 SV=1	0	19	4	4	251	0.0558912	0.00526822	103	97
Q12797	Aspartyl/asparaginyl beta-hydroxylase OS=Homo sapiens OX=9606 GN=ASPH PE=1 SV=3	0	28	17	17	758	0.0573917	0.00535755	95.3	104.7
Q8TEM1	Nuclear pore membrane glycoprotein 210 OS=Homo sapiens OX=9606 GN=NUP210 PE=1 SV=3	0	25	32	32	1887	0.0573917	0.00569828	97.3	102.7
Q8WUY8	N-acetyltransferase 14 OS=Homo sapiens OX=9606 GN=NAT14 PE=1 SV=1	0	19	2	2	206	0.0603973	0.00519281	97.9	102.1
Q9NZJ5	Eukaryotic translation initiation factor 2-alpha kinase 3 OS=Homo sapiens OX=9606 GN=EIF2AK3 PE=1 SV=3	0	9	7	7	1116	0.0603973	0.00179422	99.6	100.4
Q5SRN5	HLA class I histocompatibility antigen, A alpha chain OS=Homo sapiens OX=9606 GN=HLA-A PE=1 SV=2	0	40	11	7	371	0.0619024	0.00681627	98.5	101.5
Q06136	3-ketodihydrosphingosine reductase OS=Homo sapiens OX=9606 GN=KDSR PE=1 SV=1	0	18	4	4	332	0.0619024	0.00526822	98.4	101.6
A0A140T9T7	Antigen peptide transporter 1 OS=Homo sapiens OX=9606 GN=TAP1 PE=1 SV=1	0	24	11	11	808	0.0634092	0.00234311	97.9	102.1
H0Y5K5	Endoplasmic reticulum-Golgi intermediate compartment protein 3 (Fragment) OS=Homo sapiens OX=9606 GN=ERGIC3 PE=1 SV=1	0	16	4	4	397	0.0649175	0.00519281	98.4	101.6
Q86X29	Lipolysis-stimulated lipoprotein receptor OS=Homo sapiens OX=9606 GN=LSR PE=1 SV=4	0	10	4	4	649	0.0649175	0.00524004	95.9	104.1
P48167	Glycine receptor subunit beta OS=Homo sapiens OX=9606 GN=GLRB PE=1 SV=1	0	8	3	3	497	0.0649175	0.00494674	132.1	67.9
O14773	Tripeptidyl-peptidase 1 OS=Homo sapiens OX=9606 GN=TPP1 PE=1 SV=2	0	6	2	2	563	0.0664274	0.00569828	122.1	77.9
P43251-2	Isoform 2 of Biotinidase OS=Homo sapiens OX=9606 GN=BTD	0	6	2	2	545	0.0679388	0.0032407	98.9	101.1
Q96NB2	Sideroflexin-2 OS=Homo sapiens OX=9606 GN=SFXN2 PE=1 SV=2	0	10	2	2	322	0.0709665	0.00494674	101.4	98.6
Q9Y2U8	Inner nuclear membrane protein Man1 OS=Homo sapiens OX=9606 GN=LEMD3 PE=1 SV=2	0	38	20	20	911	0.0724828	0.0032407	96.5	103.5
Q96KC8	DnaJ homolog subfamily C member 1 OS=Homo sapiens OX=9606 GN=DNAJC1 PE=1 SV=1	0	16	6	6	554	0.0724828	0.00179422	105	95
Q7Z7M0	Multiple epidermal growth factor-like domains protein 8 OS=Homo sapiens OX=9606 GN=MEGF8 PE=1 SV=2	0	11	17	17	2845	0.0724828	0.00202542	99	101
P28799	Progranulin OS=Homo sapiens OX=9606 GN=GRN PE=1 SV=2	0	12	3	3	593	0.0740006	0.00526822	98.3	101.7
P46977	Dolichyl-diphosphooligosaccharide--protein glycosyltransferase subunit STT3A OS=Homo sapiens OX=9606 GN=STT3A PE=1 SV=2	0	13	10	8	705	0.07552	0.00861078	99.1	100.9
Q9Y2H6	Fibronectin type-III domain-containing protein 3A OS=Homo sapiens OX=9606 GN=FNDC3A PE=1 SV=4	0	12	10	10	1198	0.07552	0.00663698	94.8	105.2
Q6UXM1	Leucine-rich repeats and immunoglobulin-like domains protein 3 OS=Homo sapiens OX=9606 GN=LRIG3 PE=2 SV=1	0	16	13	11	1119	0.0785637	0.00526822	95.5	104.5
O75882	Attractin OS=Homo sapiens OX=9606 GN=ATRN PE=1 SV=2	0	6	6	6	1429	0.0785637	0.00812934	99.8	100.2
O95476	CTD nuclear envelope phosphatase 1 OS=Homo sapiens OX=9606 GN=CTDNEP1 PE=1 SV=2	0.002	5	1	1	244	0.0785637	0.00861078	99.6	100.4
P28288	ATP-binding cassette sub-family D member 3 OS=Homo sapiens OX=9606 GN=ABCD3 PE=1 SV=1	0	27	14	14	659	0.0800879	0.0032407	94.2	105.8
Q5RI15-2	Isoform 2 of Cytochrome c oxidase assembly protein COX20, mitochondrial OS=Homo sapiens OX=9606 GN=COX20	0	20	2	2	130	0.0800879	0.00681627	91.5	108.5
P35556	Fibrillin-2 OS=Homo sapiens OX=9606 GN=FBN2 PE=1 SV=3	0	19	35	35	2912	0.0800879	0.00938096	97.1	102.9
Q96GX1	Tectonic-2 OS=Homo sapiens OX=9606 GN=TCTN2 PE=2 SV=1	0	12	5	5	697	0.0800879	0.00681627	95.2	104.8
P15848	Arylsulfatase B OS=Homo sapiens OX=9606 GN=ARSB PE=1 SV=1	0	6	2	2	533	0.0816138	0.00681627	97.7	102.3
Q8NBJ5	Procollagen galactosyltransferase 1 OS=Homo sapiens OX=9606 GN=COLGALT1 PE=1 SV=1	0	32	17	17	622	0.0831412	0.0104655	93.7	106.3
O43292	Glycosylphosphatidylinositol anchor attachment 1 protein OS=Homo sapiens OX=9606 GN=GPAA1 PE=1 SV=3	0	9	5	5	621	0.0831412	0.00735236	98.3	101.7
Q14257-2	Isoform 2 of Reticulocalbin-2 OS=Homo sapiens OX=9606 GN=RCN2	0	49	11	11	335	0.0846703	0.0104655	100.6	99.4
Q15904	V-type proton ATPase subunit S1 OS=Homo sapiens OX=9606 GN=ATP6AP1 PE=1 SV=2	0	15	6	6	470	0.0846703	0.00681627	93.1	106.9
P61769	Beta-2-microglobulin OS=Homo sapiens OX=9606 GN=B2M PE=1 SV=1	0.001	18	1	1	119	0.0877334	0.00912679	96.9	103.1
Q9BTX1	Nucleoporin NDC1 OS=Homo sapiens OX=9606 GN=NDC1 PE=1 SV=2	0	7	3	3	674	0.0877334	0.00681627	87.2	112.8
Q9UHG3	Prenylcysteine oxidase 1 OS=Homo sapiens OX=9606 GN=PCYOX1 PE=1 SV=3	0	25	11	11	505	0.0892673	0.00535755	95.1	104.9
Q99805	Transmembrane 9 superfamily member 2 OS=Homo sapiens OX=9606 GN=TM9SF2 PE=1 SV=1	0	15	7	7	663	0.0908029	0.00677611	97.6	102.4
Q9NS00	Glycoprotein-N-acetylgalactosamine 3-beta-galactosyltransferase 1 OS=Homo sapiens OX=9606 GN=C1GALT1 PE=1 SV=1	0	6	2	2	363	0.0908029	0.00681627	96.8	103.2
Q13445	Transmembrane emp24 domain-containing protein 1 OS=Homo sapiens OX=9606 GN=TMED1 PE=1 SV=1	0	17	3	3	227	0.0923402	0.00922386	95.7	104.3
P05141	ADP/ATP translocase 2 OS=Homo sapiens OX=9606 GN=SLC25A5 PE=1 SV=7	0	17	5	1	298	0.093879	0.0104655	96.7	103.3
Q7LGA3	Heparan sulfate 2-O-sulfotransferase 1 OS=Homo sapiens OX=9606 GN=HS2ST1 PE=1 SV=1	0	27	8	8	356	0.100051	0.00681627	97.1	102.9
A0A1W2PQ29	GPI transamidase component PIG-T OS=Homo sapiens OX=9606 GN=PIGT PE=1 SV=1	0	21	5	1	300	0.100051	0.00861078	102.9	97.1
Q9UHB9	Signal recognition particle subunit SRP68 OS=Homo sapiens OX=9606 GN=SRP68 PE=1 SV=2	0	14	7	7	627	0.103147	0.00681627	101.5	98.5
O75787	Renin receptor OS=Homo sapiens OX=9606 GN=ATP6AP2 PE=1 SV=2	0	13	3	3	350	0.103147	0.0104655	95.1	104.9
Q9H3N1	Thioredoxin-related transmembrane protein 1 OS=Homo sapiens OX=9606 GN=TMX1 PE=1 SV=1	0	30	9	9	280	0.106249	0.00681627	100.2	99.8
P60468	Protein transport protein Sec61 subunit beta OS=Homo sapiens OX=9606 GN=SEC61B PE=1 SV=2	0.001	10	1	1	96	0.106249	0.00681627	96.3	103.7
P13674	Prolyl 4-hydroxylase subunit alpha-1 OS=Homo sapiens OX=9606 GN=P4HA1 PE=1 SV=2	0	47	19	19	534	0.107803	0.0152249	97.4	102.6
Q6UWU2	Beta-galactosidase-1-like protein OS=Homo sapiens OX=9606 GN=GLB1L PE=2 SV=1	0	10	5	4	654	0.112475	0.0140499	98.9	101.1
Q9NZ01	Very-long-chain enoyl-CoA reductase OS=Homo sapiens OX=9606 GN=TECR PE=1 SV=1	0	9	3	3	308	0.112475	0.0110857	87.8	112.2
Q16891	MICOS complex subunit MIC60 OS=Homo sapiens OX=9606 GN=IMMT PE=1 SV=1	0	15	9	9	758	0.118727	0.00861078	95.4	104.6
Q86YB8	ERO1-like protein beta OS=Homo sapiens OX=9606 GN=ERO1B PE=1 SV=2	0	33	12	11	467	0.121863	0.0111296	98.3	101.7
Q6P1M0	Long-chain fatty acid transport protein 4 OS=Homo sapiens OX=9606 GN=SLC27A4 PE=1 SV=1	0	33	15	15	643	0.123434	0.0111296	97.9	102.1
O14681	Etoposide-induced protein 2.4 homolog OS=Homo sapiens OX=9606 GN=EI24 PE=1 SV=4	0	6	2	2	340	0.123434	0.0126165	93.9	106.1
Q14697-2	Isoform 2 of Neutral alpha-glucosidase AB OS=Homo sapiens OX=9606 GN=GANAB	0	51	36	36	966	0.125006	0.0173157	97	103
O95573	Long-chain-fatty-acid--CoA ligase 3 OS=Homo sapiens OX=9606 GN=ACSL3 PE=1 SV=3	0	36	18	16	720	0.125006	0.0104655	96.1	103.9
Q8NBU5	ATPase family AAA domain-containing protein 1 OS=Homo sapiens OX=9606 GN=ATAD1 PE=1 SV=1	0	22	6	6	361	0.125006	0.0118656	93	107
A0A087WT23	UBX domain-containing protein 8 OS=Homo sapiens OX=9606 GN=UBXN8 PE=1 SV=1	0	13	2	2	310	0.125006	0.0151589	98	102
Q96K12	Fatty acyl-CoA reductase 2 OS=Homo sapiens OX=9606 GN=FAR2 PE=1 SV=1	0	10	4	4	515	0.128156	0.0150261	86.9	113.1
B4DR61	Protein transport protein Sec61 subunit alpha isoform 1 OS=Homo sapiens OX=9606 GN=SEC61A1 PE=1 SV=1	0	11	3	2	482	0.129734	0.0108018	93.7	106.3
F8VX10	KAT8 regulatory NSL complex subunit 2 OS=Homo sapiens OX=9606 GN=KANSL2 PE=1 SV=1	0	7	4	4	675	0.129734	0.0133405	95.8	104.2
P02786	Transferrin receptor protein 1 OS=Homo sapiens OX=9606 GN=TFRC PE=1 SV=2	0	30	18	18	760	0.131313	0.0117654	95.5	104.5
O95249	Golgi SNAP receptor complex member 1 OS=Homo sapiens OX=9606 GN=GOSR1 PE=1 SV=1	0	10	2	2	250	0.132894	0.0152249	95.7	104.3
E9PI68	Signal peptidase complex subunit 2 OS=Homo sapiens OX=9606 GN=SPCS2 PE=1 SV=1	0	22	5	5	257	0.136062	0.0202679	95.3	104.7
P20645	Cation-dependent mannose-6-phosphate receptor OS=Homo sapiens OX=9606 GN=M6PR PE=1 SV=1	0	12	2	2	277	0.136062	0.0152249	88.5	111.5
O95631	Netrin-1 OS=Homo sapiens OX=9606 GN=NTN1 PE=1 SV=2	0	6	2	2	604	0.136062	0.0152249	95.3	104.7
Q9BY67-3	Isoform 3 of Cell adhesion molecule 1 OS=Homo sapiens OX=9606 GN=CADM1	0	13	3	3	471	0.139236	0.0152249	100.4	99.6
A0A0U1RQC9	Cellular tumor antigen p53 OS=Homo sapiens OX=9606 GN=TP53 PE=1 SV=1	0	30	7	7	410	0.140826	0.0176771	93	107
Q9BUR5	MICOS complex subunit MIC26 OS=Homo sapiens OX=9606 GN=APOO PE=1 SV=1	0	18	3	3	198	0.140826	0.0173157	96.5	103.5
Q53FV1	ORM1-like protein 2 OS=Homo sapiens OX=9606 GN=ORMDL2 PE=1 SV=2	0.003	10	1	1	153	0.14401	0.0226897	98.8	101.2
Q9NVI7-2	Isoform 2 of ATPase family AAA domain-containing protein 3A OS=Homo sapiens OX=9606 GN=ATAD3A	0	42	20	9	586	0.147202	0.0226897	93.7	106.3
Q13724	Mannosyl-oligosaccharide glucosidase OS=Homo sapiens OX=9606 GN=MOGS PE=1 SV=5	0	39	22	22	837	0.147202	0.0226897	95.6	104.4
X6R8A1	Carboxypeptidase OS=Homo sapiens OX=9606 GN=CTSA PE=1 SV=1	0	13	4	4	498	0.147202	0.0218117	91.2	108.8
Q9C0E8-4	Isoform 4 of Endoplasmic reticulum junction formation protein lunapark OS=Homo sapiens OX=9606 GN=LNPK	0	7	3	3	459	0.147202	0.0197901	93.2	106.8
P08572	Collagen alpha-2(IV) chain OS=Homo sapiens OX=9606 GN=COL4A2 PE=1 SV=4	0	5	5	5	1712	0.147202	0.0156419	98.8	101.2
Q00765	Receptor expression-enhancing protein 5 OS=Homo sapiens OX=9606 GN=REEP5 PE=1 SV=3	0	10	2	2	189	0.148801	0.0153482	94.6	105.4
Q6Y2X3	DnaJ homolog subfamily C member 14 OS=Homo sapiens OX=9606 GN=DNAJC14 PE=2 SV=2	0	8	5	5	702	0.148801	0.0226897	93.7	106.3
O75381	Peroxisomal membrane protein PEX14 OS=Homo sapiens OX=9606 GN=PEX14 PE=1 SV=1	0	31	7	7	377	0.152003	0.0156352	93.1	106.9
Q92542	Nicastrin OS=Homo sapiens OX=9606 GN=NCSTN PE=1 SV=2	0	11	7	7	709	0.153607	0.0162765	94.6	105.4
Q9HD45	Transmembrane 9 superfamily member 3 OS=Homo sapiens OX=9606 GN=TM9SF3 PE=1 SV=2	0	11	6	6	589	0.15682	0.0202679	90.3	109.7
P61165	Transmembrane protein 258 OS=Homo sapiens OX=9606 GN=TMEM258 PE=1 SV=1	0.001	10	1	1	79	0.161653	0.0153482	104.9	95.1
O60831	PRA1 family protein 2 OS=Homo sapiens OX=9606 GN=PRAF2 PE=1 SV=1	0.001	6	1	1	178	0.166503	0.0225501	94.2	105.8
P16870	Carboxypeptidase E OS=Homo sapiens OX=9606 GN=CPE PE=1 SV=1	0	11	3	3	476	0.168123	0.0197901	94.2	105.8
Q8NC56	LEM domain-containing protein 2 OS=Homo sapiens OX=9606 GN=LEMD2 PE=1 SV=1	0	20	6	6	503	0.171368	0.0197901	91.1	108.9
Q8NCR0	UDP-GalNAc:beta-1,3-N-acetylgalactosaminyltransferase 2 OS=Homo sapiens OX=9606 GN=B3GALNT2 PE=1 SV=1	0	5	2	2	500	0.171368	0.0226897	89.9	110.1
P07686	Beta-hexosaminidase subunit beta OS=Homo sapiens OX=9606 GN=HEXB PE=1 SV=3	0	22	9	8	556	0.174621	0.0197901	93.9	106.1
O60888-2	Isoform A of Protein CutA OS=Homo sapiens OX=9606 GN=CUTA	0	22	3	3	198	0.174621	0.0226769	104.7	95.3
Q9H6H4	Receptor expression-enhancing protein 4 OS=Homo sapiens OX=9606 GN=REEP4 PE=1 SV=1	0	25	4	4	257	0.179515	0.0226897	91.7	108.3
P12236	ADP/ATP translocase 3 OS=Homo sapiens OX=9606 GN=SLC25A6 PE=1 SV=4	0	22	6	2	298	0.186065	0.0218267	93.3	106.7
P34059	N-acetylgalactosamine-6-sulfatase OS=Homo sapiens OX=9606 GN=GALNS PE=1 SV=1	0	10	4	4	522	0.186065	0.0273183	93.6	106.4
P42167	Lamina-associated polypeptide 2, isoforms beta/gamma OS=Homo sapiens OX=9606 GN=TMPO PE=1 SV=2	0	44	12	6	454	0.189351	0.0273183	87.8	112.2
P35613	Basigin OS=Homo sapiens OX=9606 GN=BSG PE=1 SV=2	0	12	3	3	385	0.189351	0.0273183	93.7	106.3
Q8IXI1	Mitochondrial Rho GTPase 2 OS=Homo sapiens OX=9606 GN=RHOT2 PE=1 SV=2	0	17	7	6	618	0.190997	0.0273183	104.9	95.1
Q8N201	Integrator complex subunit 1 OS=Homo sapiens OX=9606 GN=INTS1 PE=1 SV=2	0	8	13	13	2190	0.190997	0.0273183	92.6	107.4
P07237	Protein disulfide-isomerase OS=Homo sapiens OX=9606 GN=P4HB PE=1 SV=3	0	41	15	15	508	0.192645	0.0273183	95.4	104.6
P54709	Sodium/potassium-transporting ATPase subunit beta-3 OS=Homo sapiens OX=9606 GN=ATP1B3 PE=1 SV=1	0	16	4	4	279	0.192645	0.0261843	92.3	107.7
Q8TED1	Probable glutathione peroxidase 8 OS=Homo sapiens OX=9606 GN=GPX8 PE=1 SV=2	0	15	3	3	209	0.192645	0.0268663	91.1	108.9
Q96HY6	DDRGK domain-containing protein 1 OS=Homo sapiens OX=9606 GN=DDRGK1 PE=1 SV=2	0	42	7	7	314	0.195946	0.0241145	95.4	104.6
Q8NBZ7-2	Isoform 2 of UDP-glucuronic acid decarboxylase 1 OS=Homo sapiens OX=9606 GN=UXS1	0	24	5	5	425	0.1976	0.0273183	95.5	104.5
P26572	Alpha-1,3-mannosyl-glycoprotein 2-beta-N-acetylglucosaminyltransferase OS=Homo sapiens OX=9606 GN=MGAT1 PE=1 SV=2	0	7	2	2	445	0.1976	0.0273183	93.8	106.2
O60568	Multifunctional procollagen lysine hydroxylase and glycosyltransferase LH3 OS=Homo sapiens OX=9606 GN=PLOD3 PE=1 SV=1	0	36	21	21	738	0.199255	0.0273183	91.8	108.2
Q7KYR7	Butyrophilin subfamily 2 member A1 OS=Homo sapiens OX=9606 GN=BTN2A1 PE=1 SV=3	0	10	3	3	527	0.199255	0.0273183	92.8	107.2
O94985-2	Isoform 2 of Calsyntenin-1 OS=Homo sapiens OX=9606 GN=CLSTN1	0	8	6	6	971	0.204233	0.0273183	95.6	104.4
P48651	Phosphatidylserine synthase 1 OS=Homo sapiens OX=9606 GN=PTDSS1 PE=1 SV=1	0	18	6	6	473	0.209228	0.0250984	96.9	103.1
Q8WTV0-2	Isoform 1 of Scavenger receptor class B member 1 OS=Homo sapiens OX=9606 GN=SCARB1	0	8	4	4	509	0.209228	0.0272235	93.1	106.9
P51571	Translocon-associated protein subunit delta OS=Homo sapiens OX=9606 GN=SSR4 PE=1 SV=1	0	31	4	4	173	0.212568	0.0273183	92.8	107.2
P50402	Emerin OS=Homo sapiens OX=9606 GN=EMD PE=1 SV=1	0	43	8	8	254	0.217591	0.0273183	94.2	105.8
Q9BSJ8-2	Isoform 2 of Extended synaptotagmin-1 OS=Homo sapiens OX=9606 GN=ESYT1	0	31	22	22	1114	0.21927	0.0273183	91.2	108.8
E9PLN8	VKc domain-containing protein (Fragment) OS=Homo sapiens OX=9606 PE=4 SV=1	0	8	1	1	166	0.222633	0.0273183	89.2	110.8
Q6DN12	Multiple C2 and transmembrane domain-containing protein 2 OS=Homo sapiens OX=9606 GN=MCTP2 PE=1 SV=3	0	5	3	3	878	0.224317	0.0273183	76.1	123.9
P60059	Protein transport protein Sec61 subunit gamma OS=Homo sapiens OX=9606 GN=SEC61G PE=1 SV=1	0	37	2	2	68	0.227692	0.0273183	92.4	107.6
C9IZQ1	Translocon-associated protein subunit alpha OS=Homo sapiens OX=9606 GN=SSR1 PE=1 SV=1	0	11	3	3	298	0.227692	0.027673	90.6	109.4
Q9HCN8	Stromal cell-derived factor 2-like protein 1 OS=Homo sapiens OX=9606 GN=SDF2L1 PE=1 SV=2	0	42	4	4	221	0.231075	0.0273183	98.2	101.8
Q8NBM4	Ubiquitin-associated domain-containing protein 2 OS=Homo sapiens OX=9606 GN=UBAC2 PE=1 SV=1	0	29	7	7	344	0.231075	0.0273183	93.3	106.7
Q9UDW1	Cytochrome b-c1 complex subunit 9 OS=Homo sapiens OX=9606 GN=UQCR10 PE=1 SV=3	0.004	27	1	1	63	0.232769	0.0275738	92.2	107.8
Q9BZF1	Oxysterol-binding protein-related protein 8 OS=Homo sapiens OX=9606 GN=OSBPL8 PE=1 SV=3	0	39	24	22	889	0.236164	0.0298009	90.5	109.5
Q14114	Low-density lipoprotein receptor-related protein 8 OS=Homo sapiens OX=9606 GN=LRP8 PE=1 SV=4	0	13	10	9	963	0.239566	0.0273183	89.5	110.5
A0A1B0GU03	Peptidase A1 domain-containing protein OS=Homo sapiens OX=9606 PE=1 SV=1	0	11	5	5	582	0.24127	0.0273183	90.5	109.5
O75915	PRA1 family protein 3 OS=Homo sapiens OX=9606 GN=ARL6IP5 PE=1 SV=1	0.001	11	1	1	188	0.246395	0.0273183	91.5	108.5
Q9BTV4	Transmembrane protein 43 OS=Homo sapiens OX=9606 GN=TMEM43 PE=1 SV=1	0	46	12	12	400	0.251539	0.0273183	82.6	117.4
Q07666	KH domain-containing, RNA-binding, signal transduction-associated protein 1 OS=Homo sapiens OX=9606 GN=KHDRBS1 PE=1 SV=1	0	10	4	4	443	0.254978	0.0273183	91.3	108.7
Q4G0M1	Erythroferrone OS=Homo sapiens OX=9606 GN=ERFE PE=2 SV=2	0	7	2	2	354	0.260152	0.0290889	91	109
H7BXI1	Extended synaptotagmin-2 OS=Homo sapiens OX=9606 GN=ESYT2 PE=1 SV=2	0	36	20	20	866	0.261881	0.0273183	95.4	104.6
Q8N5K1	CDGSH iron-sulfur domain-containing protein 2 OS=Homo sapiens OX=9606 GN=CISD2 PE=1 SV=1	0	20	2	2	135	0.263612	0.0321188	39.2	160.8
Q9UNL2-2	Isoform 2 of Translocon-associated protein subunit gamma OS=Homo sapiens OX=9606 GN=SSR3	0	7	1	1	198	0.270556	0.027673	90.6	109.4
Q99470	Stromal cell-derived factor 2 OS=Homo sapiens OX=9606 GN=SDF2 PE=1 SV=2	0	18	2	2	211	0.272297	0.0296162	94.4	105.6
Q6UXT9	Protein ABHD15 OS=Homo sapiens OX=9606 GN=ABHD15 PE=1 SV=2	0	7	2	2	468	0.272297	0.0273183	90.6	109.4
Q14494	Endoplasmic reticulum membrane sensor NFE2L1 OS=Homo sapiens OX=9606 GN=NFE2L1 PE=1 SV=1	0	14	8	8	772	0.274041	0.0323539	76.2	123.8
O60488	Long-chain-fatty-acid--CoA ligase 4 OS=Homo sapiens OX=9606 GN=ACSL4 PE=1 SV=2	0	8	4	2	711	0.28279	0.04319	90.2	109.8
Q14126	Desmoglein-2 OS=Homo sapiens OX=9606 GN=DSG2 PE=1 SV=2	0	6	4	4	1118	0.284546	0.0436046	96.2	103.8
Q9BVT8	Transmembrane and ubiquitin-like domain-containing protein 1 OS=Homo sapiens OX=9606 GN=TMUB1 PE=1 SV=1	0	35	5	5	246	0.288065	0.0361757	61.1	138.9
Q15293	Reticulocalbin-1 OS=Homo sapiens OX=9606 GN=RCN1 PE=1 SV=1	0	27	8	8	331	0.293359	0.0323539	88.5	111.5
Q86UP2	Kinectin OS=Homo sapiens OX=9606 GN=KTN1 PE=1 SV=1	0	34	40	40	1357	0.296899	0.053099	87.9	112.1
Q53GQ0	Very-long-chain 3-oxoacyl-CoA reductase OS=Homo sapiens OX=9606 GN=HSD17B12 PE=1 SV=2	0	34	7	7	312	0.300448	0.0321813	92.7	107.3
Q9BVK8	Transmembrane protein 147 OS=Homo sapiens OX=9606 GN=TMEM147 PE=1 SV=1	0	12	2	2	224	0.305788	0.0457104	86.8	113.2
O94905	Erlin-2 OS=Homo sapiens OX=9606 GN=ERLIN2 PE=1 SV=1	0	53	14	12	339	0.307573	0.0545145	89.6	110.4
A0A1W2PP11	Presenilins-associated rhomboid-like protein, mitochondrial OS=Homo sapiens OX=9606 GN=PARL PE=4 SV=1	0.001	5	1	1	408	0.307573	0.0273183	85.4	114.6
Q9HBJ0	Placenta-specific protein 1 OS=Homo sapiens OX=9606 GN=PLAC1 PE=2 SV=1	0.003	6	1	1	212	0.312939	0.0509619	89.2	110.8
Q8N2G8	GH3 domain-containing protein OS=Homo sapiens OX=9606 GN=GHDC PE=1 SV=2	0	7	3	3	530	0.318326	0.0457104	100.4	99.6
P55011	Solute carrier family 12 member 2 OS=Homo sapiens OX=9606 GN=SLC12A2 PE=1 SV=1	0	15	11	11	1212	0.323733	0.0519828	82.8	117.2
P57088	Transmembrane protein 33 OS=Homo sapiens OX=9606 GN=TMEM33 PE=1 SV=2	0	34	7	7	247	0.327348	0.0472743	89.5	110.5
Q96K19	E3 ubiquitin-protein ligase RNF170 OS=Homo sapiens OX=9606 GN=RNF170 PE=1 SV=2	0.001	5	1	1	258	0.32916	0.0517523	89.3	110.7
Q7Z4R8	UPF0669 protein C6orf120 OS=Homo sapiens OX=9606 GN=C6orf120 PE=1 SV=1	0	34	2	2	191	0.33825	0.052337	88.2	111.8
P08574	Cytochrome c1, heme protein, mitochondrial OS=Homo sapiens OX=9606 GN=CYC1 PE=1 SV=3	0	12	2	2	325	0.343732	0.0452304	85.8	114.2
Q12841	Follistatin-related protein 1 OS=Homo sapiens OX=9606 GN=FSTL1 PE=1 SV=1	0	24	6	6	308	0.345564	0.0556471	98.6	101.4
Q15650	Activating signal cointegrator 1 OS=Homo sapiens OX=9606 GN=TRIP4 PE=1 SV=4	0	11	5	5	581	0.347399	0.0545145	90.9	109.1
Q9BUV8-5	Isoform 5 of Uncharacterized protein RAB5IF OS=Homo sapiens OX=9606 GN=RAB5IF	0.006	10	1	1	143	0.347399	0.0504816	82.6	117.4
O15121	Sphingolipid delta(4)-desaturase DES1 OS=Homo sapiens OX=9606 GN=DEGS1 PE=1 SV=1	0.001	5	1	1	323	0.349235	0.0545145	88	112
Q14739	Delta(14)-sterol reductase LBR OS=Homo sapiens OX=9606 GN=LBR PE=1 SV=2	0	12	6	6	615	0.351074	0.0545145	86.4	113.6
Q8N6L1-2	Isoform 2 of Keratinocyte-associated protein 2 OS=Homo sapiens OX=9606 GN=KRTCAP2	0	10	1	1	162	0.351074	0.0573413	86.6	113.4
Q9Y2R0	Cytochrome c oxidase assembly factor 3 homolog, mitochondrial OS=Homo sapiens OX=9606 GN=COA3 PE=1 SV=1	0.003	9	1	1	106	0.351074	0.0641991	86.2	113.8
Q4ZIN3	Membralin OS=Homo sapiens OX=9606 GN=TMEM259 PE=1 SV=1	0	16	7	7	620	0.352916	0.0545145	85.3	114.7
Q9UM00	Calcium load-activated calcium channel OS=Homo sapiens OX=9606 GN=TMCO1 PE=1 SV=2	0	6	1	1	239	0.362158	0.0763298	87.5	112.5
Q13190	Syntaxin-5 OS=Homo sapiens OX=9606 GN=STX5 PE=1 SV=2	0	5	2	2	355	0.365871	0.0824291	89.2	110.8
Q9NVH0	Exonuclease 3'-5' domain-containing protein 2 OS=Homo sapiens OX=9606 GN=EXD2 PE=1 SV=2	0	21	9	9	621	0.373327	0.0605344	83.2	116.8
Q99595	Mitochondrial import inner membrane translocase subunit Tim17-A OS=Homo sapiens OX=9606 GN=TIMM17A PE=1 SV=1	0	12	1	1	171	0.37707	0.0545145	80.8	119.2
Q9H9S3	Protein transport protein Sec61 subunit alpha isoform 2 OS=Homo sapiens OX=9606 GN=SEC61A2 PE=2 SV=3	0	5	2	1	476	0.384584	0.0767395	86.7	113.3
Q96D05-2	Isoform 2 of Protein FAM241B OS=Homo sapiens OX=9606 GN=FAM241B	0.001	8	1	1	163	0.388355	0.0967715	86.6	113.4
Q8WVI0	Small integral membrane protein 4 OS=Homo sapiens OX=9606 GN=SMIM4 PE=1 SV=2	0.001	16	1	1	70	0.392137	0.0827194	84.8	115.2
O60830-2	Isoform 2 of Mitochondrial import inner membrane translocase subunit Tim17-B OS=Homo sapiens OX=9606 GN=TIMM17B	0	16	2	2	222	0.397828	0.0845467	83.1	116.9
Q04721	Neurogenic locus notch homolog protein 2 OS=Homo sapiens OX=9606 GN=NOTCH2 PE=1 SV=3	0	8	14	14	2471	0.397828	0.0630961	84.7	115.3
Q9NX00	Transmembrane protein 160 OS=Homo sapiens OX=9606 GN=TMEM160 PE=1 SV=1	0	13	2	2	188	0.39973	0.0824291	85.2	114.8
Q9NXE4-2	Isoform 2 of Sphingomyelin phosphodiesterase 4 OS=Homo sapiens OX=9606 GN=SMPD4	0	13	8	8	837	0.403542	0.105265	86	114
Q9BVK2	Probable dolichyl pyrophosphate Glc1Man9GlcNAc2 alpha-1,3-glucosyltransferase OS=Homo sapiens OX=9606 GN=ALG8 PE=1 SV=2	0	10	4	4	526	0.41889	0.112157	92.1	107.9
O00483	Cytochrome c oxidase subunit NDUFA4 OS=Homo sapiens OX=9606 GN=NDUFA4 PE=1 SV=1	0	27	2	2	81	0.426625	0.114279	83.2	116.8
Q96Q45-3	Isoform 3 of Transmembrane protein 237 OS=Homo sapiens OX=9606 GN=TMEM237	0	11	3	3	432	0.428566	0.1345	84.8	115.2
Q9UH99-2	Isoform 2 of SUN domain-containing protein 2 OS=Homo sapiens OX=9606 GN=SUN2	0	25	11	11	738	0.432455	0.0970969	84.2	115.8
Q71RG4	Transmembrane and ubiquitin-like domain-containing protein 2 OS=Homo sapiens OX=9606 GN=TMUB2 PE=1 SV=2	0	20	3	3	321	0.432455	0.13724	81.5	118.5
Q02978	Mitochondrial 2-oxoglutarate/malate carrier protein OS=Homo sapiens OX=9606 GN=SLC25A11 PE=1 SV=3	0	24	6	6	314	0.434403	0.147026	84	116
Q02742	Beta-1,3-galactosyl-O-glycosyl-glycoprotein beta-1,6-N-acetylglucosaminyltransferase OS=Homo sapiens OX=9606 GN=GCNT1 PE=1 SV=2	0	6	2	2	428	0.434403	0.088186	85.1	114.9
Q5SRD1	Putative mitochondrial import inner membrane translocase subunit Tim23B OS=Homo sapiens OX=9606 GN=TIMM23B PE=5 SV=2	0	18	3	3	257	0.440263	0.193776	84.1	115.9
Q13454	Tumor suppressor candidate 3 OS=Homo sapiens OX=9606 GN=TUSC3 PE=1 SV=1	0	7	2	2	348	0.440263	0.13724	83.6	116.4
Q5SNT2	Transmembrane protein 201 OS=Homo sapiens OX=9606 GN=TMEM201 PE=1 SV=1	0	5	3	3	666	0.471929	0.149092	130.6	69.4
Q86UE4	Protein LYRIC OS=Homo sapiens OX=9606 GN=MTDH PE=1 SV=2	0	26	12	12	582	0.475936	0.243244	82.8	117.2
Q9UJS0-2	Isoform 2 of Calcium-binding mitochondrial carrier protein Aralar2 OS=Homo sapiens OX=9606 GN=SLC25A13	0	13	7	7	676	0.486004	0.237382	84.7	115.3
Q3ZBS7	Uncharacterized protein OS=Bos taurus GN=VTN PE=2 SV=1	0	11	4	4	476	0.492079	0.204558	79.4	120.6
Q9HB66	Alternative protein MKKS OS=Homo sapiens OX=9606 GN=MKKS PE=1 SV=1	0.004	27	1	1	63	0.506353	0.131077	82.6	117.4
Q96HS1	Serine/threonine-protein phosphatase PGAM5, mitochondrial OS=Homo sapiens OX=9606 GN=PGAM5 PE=1 SV=2	0	32	8	8	289	0.514573	0.328485	86.1	113.9
Q14574	Desmocollin-3 OS=Homo sapiens OX=9606 GN=DSC3 PE=1 SV=3	0	15	8	8	896	0.520769	0.360278	85.9	114.1
Q9NYL4	Peptidyl-prolyl cis-trans isomerase FKBP11 OS=Homo sapiens OX=9606 GN=FKBP11 PE=1 SV=1	0	9	1	1	201	0.524915	0.218105	82.8	117.2
O75477	Erlin-1 OS=Homo sapiens OX=9606 GN=ERLIN1 PE=1 SV=2	0	46	13	11	348	0.526992	0.351872	88.2	111.8
O43819	Protein SCO2 homolog, mitochondrial OS=Homo sapiens OX=9606 GN=SCO2 PE=1 SV=3	0	17	2	2	266	0.554273	0.344375	79.2	120.8
Q9Y6K0	Choline/ethanolaminephosphotransferase 1 OS=Homo sapiens OX=9606 GN=CEPT1 PE=1 SV=1	0	9	2	2	416	0.573467	0.264904	95.5	104.5
Q6PI78	Transmembrane protein 65 OS=Homo sapiens OX=9606 GN=TMEM65 PE=1 SV=2	0	9	2	2	240	0.586406	0.181688	79.9	120.1
P13073	Cytochrome c oxidase subunit 4 isoform 1, mitochondrial OS=Homo sapiens OX=9606 GN=COX4I1 PE=1 SV=1	0	27	4	4	169	0.588574	0.341597	79	121
Q9H061	Transmembrane protein 126A OS=Homo sapiens OX=9606 GN=TMEM126A PE=1 SV=1	0	15	2	2	195	0.588574	0.193036	79.8	120.2
Q8NBQ5	Estradiol 17-beta-dehydrogenase 11 OS=Homo sapiens OX=9606 GN=HSD17B11 PE=1 SV=3	0	11	2	2	300	0.612637	0.18928	79.1	120.9
Q9NPI0	Transmembrane protein 138 OS=Homo sapiens OX=9606 GN=TMEM138 PE=1 SV=1	0.005	9	1	1	162	0.612637	0.198622	86.5	113.5
H0UI06	Cytochrome c oxidase subunit 7A2, mitochondrial OS=Homo sapiens OX=9606 GN=COX7A2 PE=1 SV=1	0.002	11	1	1	115	0.634867	0.534303	78.3	121.7
Q96TA2	ATP-dependent zinc metalloprotease YME1L1 OS=Homo sapiens OX=9606 GN=YME1L1 PE=1 SV=2	0	25	14	14	773	0.637109	0.365028	75.4	124.6
Q9NPF0	CD320 antigen OS=Homo sapiens OX=9606 GN=CD320 PE=1 SV=1	0.001	5	1	1	282	0.662004	0.283892	75.2	124.8
Q96SK2-2	Isoform 2 of Transmembrane protein 209 OS=Homo sapiens OX=9606 GN=TMEM209	0	13	5	1	560	0.666576	0.559159	81.7	118.3
H0YMV8	40S ribosomal protein S27 OS=Homo sapiens OX=9606 GN=RPS27L PE=1 SV=1	0.003	12	1	1	100	0.673463	0.635792	77	123
H0YI09	Methyltransferase-like protein 7A (Fragment) OS=Homo sapiens OX=9606 GN=METTL7A PE=1 SV=1	0	11	2	2	244	0.680382	0.629041	74	126
P00403	Cytochrome c oxidase subunit 2 OS=Homo sapiens OX=9606 GN=MT-CO2 PE=1 SV=1	0	20	3	3	227	0.682696	0.581058	77.2	122.8
Q15043	Zinc transporter ZIP14 OS=Homo sapiens OX=9606 GN=SLC39A14 PE=1 SV=3	0	7	2	2	492	0.687335	0.373489	78.2	121.8
Q6P4A7	Sideroflexin-4 OS=Homo sapiens OX=9606 GN=SFXN4 PE=1 SV=1	0	8	2	2	337	0.691989	0.532291	75.7	124.3
Q9P2E9	Ribosome-binding protein 1 OS=Homo sapiens OX=9606 GN=RRBP1 PE=1 SV=5	0	22	21	21	1410	0.694321	0.596906	74.7	125.3
Q9NPF2	Carbohydrate sulfotransferase 11 OS=Homo sapiens OX=9606 GN=CHST11 PE=1 SV=1	0.006	7	1	1	352	0.694321	0.253369	76.4	123.6
Q7Z7H5	Transmembrane emp24 domain-containing protein 4 OS=Homo sapiens OX=9606 GN=TMED4 PE=1 SV=1	0	25	4	3	227	0.739372	0.676573	66.3	133.7
Q9Y4W6	AFG3-like protein 2 OS=Homo sapiens OX=9606 GN=AFG3L2 PE=1 SV=2	0	19	11	11	797	0.773491	0.796645	71.8	128.2
P04035-3	Isoform 3 of 3-hydroxy-3-methylglutaryl-coenzyme A reductase OS=Homo sapiens OX=9606 GN=HMGCR	0	9	6	6	908	0.818579	1.01957	60.9	139.1
H3BN98	Uncharacterized protein (Fragment) OS=Homo sapiens OX=9606 PE=4 SV=2	0	16	4	4	237	0.935117	1.34367	71.6	128.4
P02769	Serum albumin OS=Bos taurus GN=ALB PE=1 SV=4	0	10	5	5	607	0.982791	1.66692	56.6	143.4
P61626	Lysozyme C OS=Homo sapiens OX=9606 GN=LYZ PE=1 SV=1	0.002	8	1	1	148	1.46993	4.97263	52.8	147.2
P02788	Lactotransferrin OS=Homo sapiens OX=9606 GN=LTF PE=1 SV=6	0	49	25	25	710	3.29336	15.3133	13.8	186.2
Q92504	Zinc transporter SLC39A7 OS=Homo sapiens OX=9606 GN=SLC39A7 PE=1 SV=2	0	6	1	1	469	3.4112	15.3133	17.2	182.8
